# Supplementary material for: Luminescent characteristics and mitochondrial COI barcodes of nine cohabitated Taiwanese fireflies
Source: PeerJ. 2022 Oct 28;10:e14195. doi: 10.7717/peerj.14195 (PMC9620971; doi:10.7717/peerj.14195)
Supplement: Supplemental Information 2 [file peerj-10-14195-s002.xlsx]

## Sheet: morphological measurements
morphological measurements
species serial number	species	sex	TL: body length (mm)	PL: pronotum length (mm)	PW: pronotum width (mm)	EL: front wing length (mm)	EW: front wing width (mm)
170610BF11	Abscondita chinensis	female	10.21	2.01	2.85	7.53	3.82
170610BF8	Abscondita chinensis	female	10.83	2.16	3.34	8.72	4.02
170610BF6	Abscondita chinensis	female	10.43	1.91	3.11	8.11	3.8
170610BM5	Abscondita chinensis	male	9.43	2	2.79	7.31	3.27
170610river4BM10	Abscondita chinensis	male	9.72	2.09	2.87	7.49	3.31
170521BFa1	Abscondita cerata	female	10.21	2.06	3.45	7.9	3.93
170521BF2	Abscondita cerata	female	9.74	1.86	3.17	7.79	3.99
170508BE01gBFa1	Abscondita cerata	female	10.98	1.94	3.16	7.96	4.2
170508BE01gBFa2	Abscondita cerata	female	9.11	1.85	3.05	7.48	4.07
170508BE01BFa3	Abscondita cerata	female	9.98	2.1	3.01	7.69	3.96
170507BE01BFa1	Abscondita cerata	female	10.01	2.12	2.98	7.44	3.97
170501BF4	Abscondita cerata	female	9.71	1.84	2.94	7.26	3.98
170508BFa1	Abscondita cerata	female	10.49	2.02	3.21	8.45	4.66
170508LiflyBFa4	Abscondita cerata	female	11.27	2.42	3.59	9.02	4.37
170508RFa7	Abscondita cerata	female	10.35	2.06	3.33	8.35	3.72
170508RFaLig5	Abscondita cerata	female	9.85	1.98	3.09	7.45	4.06
170508RFa8	Abscondita cerata	female	7.55	1.59	2.29	5.88	2.83
170518Li02gBFa6	Abscondita cerata	female	9.66	1.96	3.07	7.39	4.04
170518BFa1	Abscondita cerata	female	9.73	2.01	2.82	7.35	3.71
170518NKgBFa2	Abscondita cerata	female	10.22	2.1	3.36	7.96	4.25
170513BFa1	Abscondita cerata	female	9.52	2.07	2.97	7.12	3.83
170428BFa1	Abscondita cerata	female	10.2	2.28	3.17	7.97	3.94
170501BF1	Abscondita cerata	female	11.31	2.35	3.32	8.36	4.35
170508BF1	Abscondita cerata	female	10.04	2.07	3.11	7.29	3.81
170429NKF1	Abscondita cerata	female	11.1	2.2	3.36	8.42	4.19
170429NKF2b	Abscondita cerata	female	10.09	1.9	3.42	7.81	4.37
170501NKF3	Abscondita cerata	female	9.98	1.85	3.12	7.97	4.05
170513River4fly-BF1	Abscondita cerata	female	10.22	2.08	3.71	8.12	3.95
170513River4ground-BF2	Abscondita cerata	female	9.79	1.93	3.42	8.27	4.38
170517NKgroundBF1	Abscondita cerata	female	9.63	1.73	3.08	7.9	4.03
170517NKgroundBF2	Abscondita cerata	female	9.95	1.86	2.91	7.58	4.24
170517NKgroundBF3	Abscondita cerata	female	10.04	2.24	3.14	7.78	3.96
170517NKgroundBF4	Abscondita cerata	female	9.52	2.06	2.67	7.46	4.43
170511BMa1	Abscondita cerata	male	9.86	2.14	2.99	7.14	3.52
170511BMa2	Abscondita cerata	male	9.3	1.91	2.83	7.04	3.45
170511BMa3	Abscondita cerata	male	9.78	1.98	2.89	7.63	3.49
170511BMa4	Abscondita cerata	male	9.61	2.01	2.96	7.09	3.39
170511BMa5	Abscondita cerata	male	9.66	1.96	2.98	7.57	3.89
170511BMa6	Abscondita cerata	male	9.44	1.99	3.07	7.17	3.53
170501BMa1	Abscondita cerata	male	9.63	1.95	2.94	7.3	3.65
170501BMa2	Abscondita cerata	male	9.51	2.14	2.97	7.56	3.84
170501BMa3	Abscondita cerata	male	9.86	2.17	2.95	7.68	3.66
170501BMa4	Abscondita cerata	male	9.42	1.54	2.69	7.35	3.51
170507BMa1BE01	Abscondita cerata	male	9.69	1.99	2.93	7.92	3.63
170513river04groundBMa1	Abscondita cerata	male	8.68	1.77	2.44	6.57	3.38
170508Li02flyBMa1	Abscondita cerata	male	9.17	1.83	2.64	7.07	3.15
170428M1-Li02ground	Abscondita cerata	male	9.58	2.18	2.85	7.6	3.67
170428M2-BE01ground	Abscondita cerata	male	9.24	1.85	2.73	6.88	3.54
170511NKflashM1	Abscondita cerata	male	9.32	2.38	2.92	7.37	3.69
170511NKflashM2	Abscondita cerata	male	9.36	1.89	2.56	7.16	3.72
170511NKflashM3	Abscondita cerata	male	9.5	1.86	2.76	7.28	3.46
170509NKflashM4	Abscondita cerata	male	8.6	1.58	2.99	7.05	3.62
170513River4ground-BM1	Abscondita cerata	male	8.96	1.86	2.46	7.53	3.62
170513River4ground-BM2	Abscondita cerata	male	9.2	1.98	3.12	7.92	3.34
170513River4ground-BM3	Abscondita cerata	male	9.22	2.09	2.38	8.12	3.74
170513River4ground-BM5	Abscondita cerata	male	9.16	1.78	2.12	7.19	3.26
170511NKfly-BM6	Abscondita cerata	male	9.59	1.76	2.79	8.07	3.64
170513river04ground-BM4	Abscondita cerata	male	8.64	1.73	2.64	7.32	3.07
170513river04fly-BM1	Abscondita cerata	male	9.68	2.08	2.41	7.64	3.42
170513river04fly-BM2	Abscondita cerata	male	9.59	2.25	2.81	7.49	3.12
170517NKgroundBM1	Abscondita cerata	male	9.22	1.97	2.84	7.29	3.69
170517NKgroundBM2	Abscondita cerata	male	9.47	1.74	2.54	7.89	4.15
170517NKgroundBM3	Abscondita cerata	male	9.63	2.16	2.69	7.24	3.68
170508YF1	Aquatica ficta	female	8.71	1.91	2.73	6.9	3.29
170507YF	Aquatica ficta	female	10.98	2.1	3.49	8.74	3.94
170610YF7	Aquatica ficta	female	10.3	2.1	3.39	7.94	3.97
170813Li02YF2	Aquatica ficta	female	8.11	1.89	2.74	6.26	3.05
170813river04groundYF1	Aquatica ficta	female	9.39	2.15	2.78	7.47	4.08
170720Li02flyYM2	Aquatica ficta	male	9.11	1.67	2.88	7.35	3.37
170610YM2	Aquatica ficta	male	8.8	1.96	2.63	6.68	3.2
170610YM1	Aquatica ficta	male	8.11	1.6	2.33	5.75	3.18
170513YM2	Aquatica ficta	male	7.53	1.7	2.28	6.03	2.7
170507YM2	Aquatica ficta	male	8.4	1.79	2.49	6.28	3.01
170508river04groundYM1	Aquatica ficta	male	9.02	1.87	2.68	6.67	3.14
170513YM1	Aquatica ficta	male	8.08	1.74	2.55	6.26	2.92
170508river04YM1	Aquatica ficta	male	8.04	1.69	2.68	6.61	2.98
170507YM2	Aquatica ficta	male	10.23	2.04	3.35	8.05	3.95
170508YM2	Aquatica ficta	male	9.18	1.7	2.87	6.71	3.44
170720river4flyYM3	Aquatica ficta	male	8.61	1.76	2.63	6.51	3.17
170720river4flyYM1	Aquatica ficta	male	9.04	1.89	2.71	7.02	3.21
170813river04YM9	Aquatica ficta	male	8.52	2.11	2.33	6.6	3.37
170813Li02YM2	Aquatica ficta	male	8.02	1.87	2.47	5.91	3.11
170813Li02YM5	Aquatica ficta	male	8.35	1.46	2.55	6.5	2.95
170430RF2	Luciola kagiana	female	10.52	2.08	3.06	8.65	3.85
170501XM1	Luciola kagiana	male	10.58	2.09	2.96	8.33	3.61
170428XM7	Luciola kagiana	male	10.26	1.94	3.07	8.4	3.55
170501RM	Luciola kagiana	male	9.85	1.93	3.15	7.79	3.52
170517XM1	Luciola kagiana	male	9.51	2.11	2.82	7.64	3.59
170517XM2	Luciola kagiana	male	8.8	1.73	2.62	7.04	3.37
170517XM3	Luciola kagiana	male	9.07	1.85	2.71	7.62	3.13
170721NKSBF1	Luciola curtithorax	female	6.78	1.09	2.11	5.03	2.51
170526SBF6	Luciola curtithorax	female	6.56	1.47	2.05	5	2.7
170721NKSBM1	Luciola curtithorax	male	6.14	0.76	1.97	4.78	2.13
170721NKSBM2	Luciola curtithorax	male	6.31	0.84	1.94	4.74	2.26
170610SBM3	Luciola curtithorax	male	5.85	1.21	1.57	4.02	2.07
170429SBM	Luciola filiformis	male	5.93	1.26	1.53	4.63	2.07
170720Li02flySBF1	Curtos sauteri	female	6.17	0.99	1.71	4.69	2.15
170610SBF4	Curtos sauteri	female	7.07	1.43	2.29	5.61	2.65
170813Li02SBM3	Curtos sauteri	female	6.86	1.5	1.99	5.63	2.55
170813Li02SBM1	Curtos sauteri	female	5.61	1.18	1.54	4.34	2.51
170521LI02flySBM1	Curtos sauteri	male	6.13	1.13	1.83	4.87	2.09
170813Li02M5	Curtos costipennis	female	7.32	1.68	2.26	5.72	2.54

## Sheet: light spectrum
Lamda max spectrum of fireflies
location	sample	species	sex	Lamda max(nm)	gender-av	ste	total-av	ste
Nanzhuang, Miaoli	firefly170513river04fly-BF1	Abscondita cerata	female	560	562.176	0.439211	563.089	0.276746
Nanzhuang, Miaoli	170521LI02flyBF2	Abscondita cerata	female	560
Nanzhuang, Miaoli	170521LI02flyBF4	Abscondita cerata	female	560
Nanzhuang, Miaoli	170522LI02flyBF1	Abscondita cerata	female	560
Nanzhuang, Miaoli	170521LI02flyBF1	Abscondita cerata	female	561
Nanzhuang, Miaoli	170521LI02flyBF3	Abscondita cerata	female	563
Nanzhuang, Miaoli	170513River4fly_BF1	Abscondita cerata	female	565
Nanzhuang, Miaoli	170513River4ground_BF2	Abscondita cerata	female	565
Nankang, Taipei	170517NKgroundBF3	Abscondita cerata	female	561
Nankang, Taipei	170517NKgroundBF1	Abscondita cerata	female	562
Nankang, Taipei	170517NKgroundBF4	Abscondita cerata	female	562
Nankang, Taipei	170517NKgroundBF2	Abscondita cerata	female	563
Nankang, Taipei	female0501F3	Abscondita cerata	female	561
Nankang, Taipei	female0501F4	Abscondita cerata	female	562
Nankang, Taipei	female0501F1	Abscondita cerata	female	563
Nankang, Taipei	female0429F2b	Abscondita cerata	female	564
Nankang, Taipei	female0429F1	Abscondita cerata	female	565
Nanzhuang, Miaoli	firefly170513river04ground-BM4	Abscondita cerata	male	563	563.643	0.317956
Nanzhuang, Miaoli	firefly170513river04fly-BM1	Abscondita cerata	male	563
Nanzhuang, Miaoli	firefly170513river04fly-BM2	Abscondita cerata	male	564
Nanzhuang, Miaoli	170521LI02flyBM1	Abscondita cerata	male	564
Nanzhuang, Miaoli	170513River4ground_BM1	Abscondita cerata	male	565
Nanzhuang, Miaoli	170513River4ground_BM2	Abscondita cerata	male	565
Nanzhuang, Miaoli	170513River4ground_BM3	Abscondita cerata	male	565
Nanzhuang, Miaoli	170513River4ground_BM4	Abscondita cerata	male	565
Nanzhuang, Miaoli	170513River4ground_BM5	Abscondita cerata	male	565
Nanzhuang, Miaoli	male0428M2_BE01ground	Abscondita cerata	male	564
Nanzhuang, Miaoli	male0428M3_BE01ground	Abscondita cerata	male	564
Nanzhuang, Miaoli	male0428M5_LIground	Abscondita cerata	male	564
Nanzhuang, Miaoli	male0428M1_LI02ground	Abscondita cerata	male	566
Nanzhuang, Miaoli	170522LI02flyBM1	Abscondita cerata	male	560
Nankang, Taipei	firefly170511NangGangfly-BM6	Abscondita cerata	male	560
Nankang, Taipei	170517NKgroundBM2	Abscondita cerata	male	560
Nankang, Taipei	170517NKgroundBM3	Abscondita cerata	male	562
Nankang, Taipei	170517NKgroundBM1	Abscondita cerata	male	563
Nankang, Taipei	170511flashM1	Abscondita cerata	male	565
Nankang, Taipei	170511flashM2	Abscondita cerata	male	565
Nankang, Taipei	170511flashM3	Abscondita cerata	male	565
Nankang, Taipei	170509flashM4	Abscondita cerata	male	565
Nankang, Taipei	170526NKfly_BM1	Abscondita cerata	male	562
Nankang, Taipei	170526NKfly_BM2	Abscondita cerata	male	563
Nankang, Taipei	170526NKfly_BM3	Abscondita cerata	male	563
Nankang, Taipei	170526NKfly_BM4	Abscondita cerata	male	563
Nankang, Taipei	170526NKfly_BM5	Abscondita cerata	male	563
Nankang, Taipei	male0420M4	Abscondita cerata	male	566
Nanzhuang, Miaoli	170610River04_BF11	Abscondita chinensis	female	571	571.333	0.333333	571.6	0.244949
Nanzhuang, Miaoli	170610River04_BF8	Abscondita chinensis	female	571
Nanzhuang, Miaoli	170610River04_BF6	Abscondita chinensis	female	572
Nanzhuang, Miaoli	170610River04_BM10	Abscondita chinensis	male	572	572	0
Nanzhuang, Miaoli	170610River04_BM5	Abscondita chinensis	male	572
Nanzhuang, Miaoli	170610River04_BF7	Aquatica ficta	female	564	564	0.547723	564.318	0.231561
Nanzhuang, Miaoli	170813river4_YF3	Aquatica ficta	female	562
Nanzhuang, Miaoli	170813river4_YF1	Aquatica ficta	female	565
Nanzhuang, Miaoli	170813river4_YF4	Aquatica ficta	female	565
Nanzhuang, Miaoli	170813Li02_YF2	Aquatica ficta	female	564
Nanzhuang, Miaoli	firefly170513river04fly-YM1	Aquatica ficta	male	562	564.412	0.258087
Nanzhuang, Miaoli	firefly170508river04ground-YM1	Aquatica ficta	male	564
Nanzhuang, Miaoli	170610River04_YM1	Aquatica ficta	male	564
Nanzhuang, Miaoli	170610River04_YM2	Aquatica ficta	male	565
Nanzhuang, Miaoli	170720River04YM1	Aquatica ficta	male	564
Nanzhuang, Miaoli	170720River04YM2	Aquatica ficta	male	565
Nanzhuang, Miaoli	170720River04YM3	Aquatica ficta	male	565
Nanzhuang, Miaoli	170813Li02_YM5	Aquatica ficta	male	563
Nanzhuang, Miaoli	170813river4_YM1	Aquatica ficta	male	564
Nanzhuang, Miaoli	170813Li02_YM2	Aquatica ficta	male	564
Nanzhuang, Miaoli	170813river4_YM3	Aquatica ficta	male	564
Nanzhuang, Miaoli	170813river4_YM7	Aquatica ficta	male	564
Nanzhuang, Miaoli	170813river4_YM4	Aquatica ficta	male	565
Nanzhuang, Miaoli	170813river4_YM6	Aquatica ficta	male	565
Nanzhuang, Miaoli	170813river4_YM8	Aquatica ficta	male	565
Nanzhuang, Miaoli	170813river4_YM9	Aquatica ficta	male	565
Nankang, Taipei	170812NKfly_YM1	Aquatica ficta	male	567
Nanzhuang, Miaoli	170813river4_M5	Curtos costipennis	male	554
Nanzhuang, Miaoli	170521LI02flySBF1	Curtos sauteri	female	554	554	0.316228	553.5	0.422577
Nanzhuang, Miaoli	170610River04_BF9	Curtos sauteri	female	553
Nanzhuang, Miaoli	170610River04_BF4	Curtos sauteri	female	554
Nanzhuang, Miaoli	170720Li02SBF1	Curtos sauteri	female	555
Nanzhuang, Miaoli	170813Li02_SBM3	Curtos sauteri	female	554
Nanzhuang, Miaoli	170521LI02flySBM1	Curtos sauteri	male	553	552.667	0.881917
Nanzhuang, Miaoli	170522LI02flySBM1	Curtos sauteri	male	554
Nanzhuang, Miaoli	170813Li02_SBM1	Curtos sauteri	male	551
Nankang, Taipei	170518NKflySBM4	L. filiformis	male	567	567.333	0.224733
Nankang, Taipei	170529NK_SBM10	L. filiformis	male	567
Nankang, Taipei	170529NK_SBM4	L. filiformis	male	567
Nankang, Taipei	170601NK_SBM13	L. filiformis	male	567
Nankang, Taipei	170601NK_SBM2	L. filiformis	male	567
Nankang, Taipei	170601NK_SBM3	L. filiformis	male	567
Nankang, Taipei	170601NK_SBM4	L. filiformis	male	567
Nankang, Taipei	170601NK_SBM5	L. filiformis	male	567
Nankang, Taipei	170529NK_SBM11	L. filiformis	male	567
Nankang, Taipei	170529NK_SBM17	L. filiformis	male	567
Nankang, Taipei	170601NK_SBM10	L. filiformis	male	569
Nankang, Taipei	170529NK_SBM5	L. filiformis	male	569
Nankang, Taipei	170526NKground_SBF4	Luciola curtithorax	female	567	566.25	0.350865	570.5	0.512642
Nankang, Taipei	170526NKground_SBF5	Luciola curtithorax	female	567
Nankang, Taipei	170526NKground_SBF6	Luciola curtithorax	female	567
Nankang, Taipei	170526NKground_SBF9	Luciola curtithorax	female	567
Nankang, Taipei	170526NKground_SBF13	Luciola curtithorax	female	567
Nankang, Taipei	170518NKflySBF1	Luciola curtithorax	female	567
Nankang, Taipei	170601NK_SBF1	Luciola curtithorax	female	564
Nankang, Taipei	170601NK_SBF11	Luciola curtithorax	female	564
Nankang, Taipei	170529NK_SBF15	Luciola curtithorax	female	565
Nankang, Taipei	170529NK_SBF8	Luciola curtithorax	female	566
Nankang, Taipei	170529NK_SBF3	Luciola curtithorax	female	567
Nankang, Taipei	170721NKfly_SBF1	Luciola curtithorax	female	567
Nankang, Taipei	170526NKground_SRM1	Luciola curtithorax	male	572	572.462	0.236843
Nankang, Taipei	170526NKground_SRM2	Luciola curtithorax	male	573
Nankang, Taipei	170526NKground_SBM3	Luciola curtithorax	male	573
Nankang, Taipei	170526NKground_SBM7	Luciola curtithorax	male	573
Nankang, Taipei	170526NKground_SBM8	Luciola curtithorax	male	573
Nankang, Taipei	170526NKground_SBM10	Luciola curtithorax	male	573
Nankang, Taipei	170526NKground_SBM11	Luciola curtithorax	male	573
Nankang, Taipei	170526NKground_SBM12	Luciola curtithorax	male	573
Nankang, Taipei	170518NKflySBM5	Luciola curtithorax	male	570
Nankang, Taipei	170518NKflySBM2	Luciola curtithorax	male	572
Nankang, Taipei	170518NKflySBM1	Luciola curtithorax	male	573
Nankang, Taipei	170518NKflySBM3	Luciola curtithorax	male	573
Nankang, Taipei	170529NK_SBM6	Luciola curtithorax	male	572
Nankang, Taipei	170601NK_SBM6	Luciola curtithorax	male	572
Nankang, Taipei	170601NK_SBM8	Luciola curtithorax	male	572
Nankang, Taipei	170529NK_SBM1	Luciola curtithorax	male	573
Nankang, Taipei	170529NK_SBM13	Luciola curtithorax	male	573
Nankang, Taipei	170529NK_SBM19	Luciola curtithorax	male	573
Nankang, Taipei	170529NK_SBM2	Luciola curtithorax	male	573
Nankang, Taipei	170601NK_SBM12	Luciola curtithorax	male	573
Nankang, Taipei	170529NK_SBM18	Luciola curtithorax	male	570
Nankang, Taipei	170529NK_SBM14	Luciola curtithorax	male	571
Nankang, Taipei	170529NK_SBM16	Luciola curtithorax	male	571
Nankang, Taipei	170529NK_SBM9	Luciola curtithorax	male	571
Nankang, Taipei	170721NKground_SBM1	Luciola curtithorax	male	573
Nankang, Taipei	170721NKground_SBM2	Luciola curtithorax	male	576
Nanzhuang, Miaoli	170610River04_SBM3	Luciola filiformis	male	572
Nankang, Taipei	female0430F1bredfly	Luciola kagiana	female	574	574.333	0.333333	574.167	0.477261
Nankang, Taipei	female0501F5bredfly	Luciola kagiana	female	574
Nankang, Taipei	female0430F2bredfly	Luciola kagiana	female	575
Nanzhuang, Miaoli	male0428M4redfly_BE01fly	Luciola kagiana	male	572	574	1
Nankang, Taipei	170517NKflyXM1	Luciola kagiana	male	575
Nankang, Taipei	170517NKflyXM2	Luciola kagiana	male	575
Nanzhuang, Miaoli	170813river4_A1	Pyrocoelia praetexta	larva	552	552.667	0.333333
Nanzhuang, Miaoli	170813river4_A2	Pyrocoelia praetexta	larva	553
Nanzhuang, Miaoli	170813river4_A3	Pyrocoelia praetexta	larva	553

## Sheet: light spectrum & intensity
light spectrum & intensity of fireflies
location	sample	species	sex	Lamda max(nm)	average	ste	maximum light intensity(nW/cm²)	average	ste	max
Nanzhuang, Miaoli	170610River04_BF7	Aquatica ficta	female	564	564	0.547723	315	569.4	101.12	850
Nanzhuang, Miaoli	170813river4_YF3	Aquatica ficta	female	562			850
Nanzhuang, Miaoli	170813river4_YF1	Aquatica ficta	female	565			574
Nanzhuang, Miaoli	170813river4_YF4	Aquatica ficta	female	565			380
Nanzhuang, Miaoli	170813Li02_YF2	Aquatica ficta	female	564			728
Nanzhuang, Miaoli	firefly170513river04fly-YM1	Aquatica ficta	male	562	564.25	0.214087	135	508.125	73.336	1102
Nanzhuang, Miaoli	firefly170508river04ground-YM1	Aquatica ficta	male	564			103.7
Nanzhuang, Miaoli	170610River04_YM1	Aquatica ficta	male	564			447.7
Nanzhuang, Miaoli	170610River04_YM2	Aquatica ficta	male	565			210.6
Nanzhuang, Miaoli	170720River04YM1	Aquatica ficta	male	564			575
Nanzhuang, Miaoli	170720River04YM2	Aquatica ficta	male	565			1102
Nanzhuang, Miaoli	170720River04YM3	Aquatica ficta	male	565			490
Nanzhuang, Miaoli	170813Li02_YM5	Aquatica ficta	male	563			442
Nanzhuang, Miaoli	170813river4_YM1	Aquatica ficta	male	564			406
Nanzhuang, Miaoli	170813Li02_YM2	Aquatica ficta	male	564			231
Nanzhuang, Miaoli	170813river4_YM3	Aquatica ficta	male	564			380
Nanzhuang, Miaoli	170813river4_YM7	Aquatica ficta	male	564			734
Nanzhuang, Miaoli	170813river4_YM4	Aquatica ficta	male	565			456
Nanzhuang, Miaoli	170813river4_YM6	Aquatica ficta	male	565			580
Nanzhuang, Miaoli	170813river4_YM8	Aquatica ficta	male	565			1050
Nanzhuang, Miaoli	170813river4_YM9	Aquatica ficta	male	565			787
Nanzhuang, Miaoli	170610River04_BF11	Abscondita chinensis	female	571	571.333	0.333333	329.7	245.7	83.9	329.7
Nanzhuang, Miaoli	170610River04_BF8	Abscondita chinensis	female	571			329.5
Nanzhuang, Miaoli	170610River04_BF6	Abscondita chinensis	female	572			77.9
Nanzhuang, Miaoli	170610River04_BM10	Abscondita chinensis	male	572	572	0	NA	332.1	-	332.1
Nanzhuang, Miaoli	170610River04_BM5	Abscondita chinensis	male	572			332.1
Nanzhuang, Miaoli	170521LI02flySBF1	Curtos sauteri	female	554	554	0.316228	294.5	187.74	55.72	349.3
Nanzhuang, Miaoli	170610River04_BF9	Curtos sauteri	female	553			78.9
Nanzhuang, Miaoli	170610River04_BF4	Curtos sauteri	female	554			349.3
Nanzhuang, Miaoli	170720Li02SBF1	Curtos sauteri	female	555			112
Nanzhuang, Miaoli	170813Li02_SBM3	Curtos sauteri	female	554			104
Nanzhuang, Miaoli	170521LI02flySBM1	Curtos sauteri	male	553	552.667	0.881917	536.7	347.267	95.949	536.7
Nanzhuang, Miaoli	170522LI02flySBM1	Curtos sauteri	male	554			279.1
Nanzhuang, Miaoli	170813Li02_SBM1	Curtos sauteri	male	551			226
Nanzhuang, Miaoli	male0428M4redfly_BE01fly	Luciola curtithorax	male	572	572		NA
Nanzhuang, Miaoli	170610River04_SBM3	Luciola filiformis	male	572			52.2
Nanzhuang, Miaoli	firefly170513river04fly-BF1	Abscondita cerata	female	560	561.75	0.796196	130	101.956	18.5092	187
Nanzhuang, Miaoli	170521LI02flyBF2	Abscondita cerata	female	560			74.7
Nanzhuang, Miaoli	170521LI02flyBF4	Abscondita cerata	female	560			66.8
Nanzhuang, Miaoli	170522LI02flyBF1	Abscondita cerata	female	560			147.9
Nanzhuang, Miaoli	170521LI02flyBF1	Abscondita cerata	female	561			57.9
Nanzhuang, Miaoli	170521LI02flyBF3	Abscondita cerata	female	563			32.35
Nanzhuang, Miaoli	170513River4fly_BF1	Abscondita cerata	female	565			187
Nanzhuang, Miaoli	170513River4ground_BF2	Abscondita cerata	female	565			119
Nanzhuang, Miaoli	firefly170513river04ground-BM4	Abscondita cerata	male	563	564.071	0.384655	164.9	512.389	198.319	2048
Nanzhuang, Miaoli	firefly170513river04fly-BM1	Abscondita cerata	male	563			2048
Nanzhuang, Miaoli	firefly170513river04fly-BM2	Abscondita cerata	male	564			298.2
Nanzhuang, Miaoli	170521LI02flyBM1	Abscondita cerata	male	564			62.4
Nanzhuang, Miaoli	170513River4ground_BM1	Abscondita cerata	male	565			270
Nanzhuang, Miaoli	170513River4ground_BM2	Abscondita cerata	male	565			413
Nanzhuang, Miaoli	170513River4ground_BM3	Abscondita cerata	male	565			473
Nanzhuang, Miaoli	170513River4ground_BM4	Abscondita cerata	male	565			551
Nanzhuang, Miaoli	170513River4ground_BM5	Abscondita cerata	male	565			331
Nanzhuang, Miaoli	male0428M2_BE01ground	Abscondita cerata	male	564			NA
Nanzhuang, Miaoli	male0428M3_BE01ground	Abscondita cerata	male	564			NA
Nanzhuang, Miaoli	male0428M5_LIground	Abscondita cerata	male	564			NA
Nanzhuang, Miaoli	male0428M1_LI02ground	Abscondita cerata	male	566			NA
Nanzhuang, Miaoli	170522LI02flyBM1	Abscondita cerata	male	560
Nanzhuang, Miaoli	170813river4_M5	Curtos costipennis	male	554			462
Nanzhuang, Miaoli	170813river4_A1	Pyrocoelia praetexta	larva	552	552.667	0.333333
Nanzhuang, Miaoli	170813river4_A2	Pyrocoelia praetexta	larva	553
Nanzhuang, Miaoli	170813river4_A3	Pyrocoelia praetexta	larva	553
Nankang, Taipei	170526NKground_SRM1	Luciola curtithorax	male	572	572.462	0.236843	772.6	356.111	47.9613	814.1
Nankang, Taipei	170526NKground_SRM2	Luciola curtithorax	male	573			0.4776
Nankang, Taipei	170526NKground_SBM3	Luciola curtithorax	male	573			649.6
Nankang, Taipei	170526NKground_SBM7	Luciola curtithorax	male	573			292.7
Nankang, Taipei	170526NKground_SBM8	Luciola curtithorax	male	573			250
Nankang, Taipei	170526NKground_SBM10	Luciola curtithorax	male	573			290.5
Nankang, Taipei	170526NKground_SBM11	Luciola curtithorax	male	573			492.4
Nankang, Taipei	170526NKground_SBM12	Luciola curtithorax	male	573			329.7
Nankang, Taipei	170518NKflySBM5	Luciola curtithorax	male	570			27.91
Nankang, Taipei	170518NKflySBM2	Luciola curtithorax	male	572			318.8
Nankang, Taipei	170518NKflySBM1	Luciola curtithorax	male	573			275.9
Nankang, Taipei	170518NKflySBM3	Luciola curtithorax	male	573			91
Nankang, Taipei	170529NK_SBM6	Luciola curtithorax	male	572			13.2
Nankang, Taipei	170601NK_SBM6	Luciola curtithorax	male	572			432.9
Nankang, Taipei	170601NK_SBM8	Luciola curtithorax	male	572			224.5
Nankang, Taipei	170529NK_SBM1	Luciola curtithorax	male	573			263.9
Nankang, Taipei	170529NK_SBM13	Luciola curtithorax	male	573			697.6
Nankang, Taipei	170529NK_SBM19	Luciola curtithorax	male	573			486.1
Nankang, Taipei	170529NK_SBM2	Luciola curtithorax	male	573			598.6
Nankang, Taipei	170601NK_SBM12	Luciola curtithorax	male	573			814.1
Nankang, Taipei	170529NK_SBM18	Luciola curtithorax	male	570			174.2
Nankang, Taipei	170529NK_SBM14	Luciola curtithorax	male	571			39.1
Nankang, Taipei	170529NK_SBM16	Luciola curtithorax	male	571			313.7
Nankang, Taipei	170529NK_SBM9	Luciola curtithorax	male	571			341.4
Nankang, Taipei	170721NKground_SBM1	Luciola curtithorax	male	573			275
Nankang, Taipei	170721NKground_SBM2	Luciola curtithorax	male	576			793
Nankang, Taipei	170526NKground_SBF4	Luciola curtithorax	female	567	566.25	0.350865	29.02	157.909	30.4349	301.3
Nankang, Taipei	170526NKground_SBF5	Luciola curtithorax	female	567			278.6
Nankang, Taipei	170526NKground_SBF6	Luciola curtithorax	female	567			25.87
Nankang, Taipei	170526NKground_SBF9	Luciola curtithorax	female	567			291.6
Nankang, Taipei	170526NKground_SBF13	Luciola curtithorax	female	567			232.6
Nankang, Taipei	170518NKflySBF1	Luciola curtithorax	female	567			30.52
Nankang, Taipei	170601NK_SBF1	Luciola curtithorax	female	564			138.2
Nankang, Taipei	170601NK_SBF11	Luciola curtithorax	female	564			57.1
Nankang, Taipei	170529NK_SBF15	Luciola curtithorax	female	565			186.9
Nankang, Taipei	170529NK_SBF8	Luciola curtithorax	female	566			193.2
Nankang, Taipei	170529NK_SBF3	Luciola curtithorax	female	567			301.3
Nankang, Taipei	170721NKfly_SBF1	Luciola curtithorax	female	567			130
Nankang, Taipei	female0430F1bredfly	Luciola curtithorax	female	574	574.333	0.333333	NA
Nankang, Taipei	female0501F5bredfly	Luciola curtithorax	female	574			NA
Nankang, Taipei	female0430F2bredfly	Luciola curtithorax	female	575			NA
Nankang, Taipei	170517NKflyXM1	Luciola curtithorax	male	575	575	0	10.2	5.43	4.77	10.2
Nankang, Taipei	170517NKflyXM2	Luciola curtithorax	male	575			0.66
Nankang, Taipei	170518NKflySBM4	Luciola filiformis	male	567	567.333	0.224733	14.35	182.079	31.1618	323.8
Nankang, Taipei	170529NK_SBM10	Luciola filiformis	male	567			322.2
Nankang, Taipei	170529NK_SBM4	Luciola filiformis	male	567			283.3
Nankang, Taipei	170601NK_SBM13	Luciola filiformis	male	567			53.2
Nankang, Taipei	170601NK_SBM2	Luciola filiformis	male	567			176.9
Nankang, Taipei	170601NK_SBM3	Luciola filiformis	male	567			173.2
Nankang, Taipei	170601NK_SBM4	Luciola filiformis	male	567			323.8
Nankang, Taipei	170601NK_SBM5	Luciola filiformis	male	567			140.8
Nankang, Taipei	170529NK_SBM11	Luciola filiformis	male	567			120.7
Nankang, Taipei	170529NK_SBM17	Luciola filiformis	male	567			302.5
Nankang, Taipei	170601NK_SBM10	Luciola filiformis	male	569			68.7
Nankang, Taipei	170529NK_SBM5	Luciola filiformis	male	569			205.3
Nankang, Taipei	170517NKgroundBF3	Abscondita cerata	female	561	562.25	0.444444	282.2	164.55	40.5744	282.2
Nankang, Taipei	170517NKgroundBF1	Abscondita cerata	female	562			104.6
Nankang, Taipei	170517NKgroundBF4	Abscondita cerata	female	562			153.8
Nankang, Taipei	170517NKgroundBF2	Abscondita cerata	female	563			117.6
Nankang, Taipei	female0501F3	Abscondita cerata	female	561
Nankang, Taipei	female0501F4	Abscondita cerata	female	562
Nankang, Taipei	female0501F1	Abscondita cerata	female	563
Nankang, Taipei	female0429F2b	Abscondita cerata	female	564
Nankang, Taipei	female0429F1	Abscondita cerata	female	565
Nankang, Taipei	firefly170511NangGangfly-BM6	Abscondita cerata	male	560	563.214	0.493681	1065	333.393	91.2579	1065
Nankang, Taipei	170517NKgroundBM2	Abscondita cerata	male	560			294.2
Nankang, Taipei	170517NKgroundBM3	Abscondita cerata	male	562			106.5
Nankang, Taipei	170517NKgroundBM1	Abscondita cerata	male	563			677.4
Nankang, Taipei	170511flashM1	Abscondita cerata	male	565			198.6
Nankang, Taipei	170511flashM2	Abscondita cerata	male	565			11.9
Nankang, Taipei	170511flashM3	Abscondita cerata	male	565			0.95
Nankang, Taipei	170509flashM4	Abscondita cerata	male	565			9.46
Nankang, Taipei	170526NKfly_BM1	Abscondita cerata	male	562			702.2
Nankang, Taipei	170526NKfly_BM2	Abscondita cerata	male	563			106.6
Nankang, Taipei	170526NKfly_BM3	Abscondita cerata	male	563			585.9
Nankang, Taipei	170526NKfly_BM4	Abscondita cerata	male	563			297.6
Nankang, Taipei	170526NKfly_BM5	Abscondita cerata	male	563			277.8
Nankang, Taipei	male0420M4	Abscondita cerata	male	566			NA
Nankang, Taipei	170812NKfly_YM1	Aquatica ficta	male	567			807

## Sheet: temperature, relative humidity
A. Nankang, Taipei:
activity	Temp-av	temp-std	RH-av	Rh-std	Intensity, Lux-av	Int-std		interval	Temp(°C)	RH (%)	Intensity (Lux)				HOBO U12-012
twilight	25.0044	0.731679	84.019	3.4861	58.6224	30.4654	2017-04-20	18:18-18:30	25.0±0.73	84.02±3.49	58.6±30.5				20034486
start flash/flying	22.6116	0.135593	95.7859	0.467109	4.68618	2.36553	2017-04-20	18:30-19:00	22.6±0.14	95.79±0.47	4.69±2.37				Pat. #6826664
A. Nankang, Taipei:															data logger
activity	Temp-av	temp-std	RH-av	Rh-std	Intensity, Lux-av	Int-std		interval	Temp(°C)	RH (%)	Intensity (Lux)				temp/RH/light/ext channel
twilight	19.8	1.08419	76.9	4.37833	390.8	249.655	2017-04-29	17:59-18:25	19.8±1.08	76.9±4.38	390.8±249.7
start flash/flying	17.1	0.825329	87.3	1.67005	5.4	3.09416	2017-04-29	18:30-19:30	17.1±0.83	87.3±1.67	5.40±3.09
A. Nankang, Taipei:
activity	Temp-av	temp-std	RH-av	Rh-std	Intensity, Lux-av	Int-std		interval	Temp(°C)	RH (%)	Intensity (Lux)
twilight	23.2111	0.36145	81.7914	1.83243	68.0578	21.0258	2017-05-01	18:22-18:30	23.2±0.36	81.8±1.83	68.1±21.0
start flash/flying	21.2385	0.45389	91.9587	2.41084	7.63415	6.9097	2017-05-01	18:30-19:30	21.2±0.45	92.0±2.41	7.63±6.91
A. Nankang, Taipei:
activity	Temp-av	temp-std	RH-av	Rh-std	Intensity, Lux-av	Int-std		interval	Temp(°C)	RH (%)	Intensity (Lux)
twilight	23.414	0.80965	86.6167	4.36427	328.913	306.42	2017-05-18	18:05-18:40	23.4±0.81	86.6±4.36	328.9±306.4
start flash/flying	22.2805	0.17194	92.8717	0.94468	7.613	4.76394	2017-05-18	18:40-19:30	22.3±0.17	92.9±0.94	7.61±4.76
	1.1335		-6.255
B. Nanzhuang, Miaoli:
activity	Temp-av	temp-std	RH-av	Rh-std	Intensity, Lux-av	Int-std		interval	Temp(°C)	RH (%)	Intensity (Lux)
twilight	20.33	0.46	71.15	1.85	122.53	26.3	2017-04-28	18:26-18:30	20.3±0.46	71.2±1.85	122.5±26.3
start flash/flying	17.89	0.87	86.64	4.04	5.94	3.47	2017-04-28	19:00-19:30	17.9±0.87	86.6±4.04	5.94±3.47
B. Nanzhuang, Miaoli:
activity	Temp-av	temp-std	RH-av	Rh-std	Intensity, Lux-av	Int-std		interval	Temp(°C)	RH (%)	Intensity (Lux)
twilight	23.7	0.37	91.65	0.93	289.37	233.33	2017-05-07	18:00-18:39	23.7±0.37	91.7±0.93	289.4±233.3
start flash/flying	22.67	0.4	94.82	1.23	6.12	3.61	2017-05-07	18:40-19:40	22.7±0.40	94.8±1.23	6.12±3.61
B. Nanzhuang, Miaoli:
activity	Temp-av	temp-std	RH-av	Rh-std	Intensity, Lux-av	Int-std		interval	Temp(°C)	RH (%)	Intensity (Lux)
twilight	22.81	0.12	92.91	0.41	76.1	52.2	2017-05-08	18:00-18:36	22.8±0.12	92.9±0.41	76.1±52.2
start flash/flying	22	0.29	95.06	0.73	6.35	3.69	2017-05-08	18:37-20:00	22.0±0.29	95.1±0.73	6.35±3.69
Date	Activity	Temp(°C)	RH (%)	Intensity (Lux)
A. Nankang, Taipei:
2017-04-20	twilight	25.0±0.73	84.0±3.49	58.6±30.5
	start flash/flying	22.6±0.14	95.8±0.47	4.69±2.37
2017-04-29	twilight	19.8±1.08	76.9±4.38	390.8±249.7
	start flash/flying	17.1±0.83	87.3±1.67	5.40±3.09		17.1-25.0
2017-05-01	twilight	23.2±0.36	81.8±1.83	68.1±21.0
	start flash/flying	21.2±0.45	92.0±2.41	7.63±6.91
2017-05-18	twilight	23.4±0.81	86.6±4.36	328.9±306.4
	start flash/flying	22.3±0.17	92.9±0.94	7.61±4.76
B. Nanzhuang, Miaoli:
2017-04-28	twilight	20.3±0.46	71.2±1.85	122.5±26.3
	start flash/flying	17.9±0.87	86.6±4.04	5.94±3.47
2017-05-07	twilight	23.7±0.37	91.7±0.93	289.4±233.3		17.9-23.7
	start flash/flying	22.7±0.40	94.8±1.23	6.12±3.61
2017-05-08	twilight	22.8±0.12	92.9±0.41	76.1±52.2
	start flash/flying	22.0±0.29	95.1±0.73	6.35±3.69

## Sheet: 20170420_NangGang
20034486_20170420_NangGang&6VLE
Plot Title: 20034486_20170420_NangGang
#	Date Time, GMT+08:00	Temp, °C (LGR S/N: 20034486, SEN S/N: 20034486)	RH, % (LGR S/N: 20034486, SEN S/N: 20034486)	Intensity, Lux (LGR S/N: 20034486, SEN S/N: 20034486)	End Of File (LGR S/N: 20034486)	Temp-av	temp-std	RH-av	Rh-std	Intensity, Lux-av	Int-std
1082	18:18:01	26.524	74.808	11.8		25.0044	0.731679	84.019	3.4861	58.6224	30.4654
1083	18:18:02	26.524	74.984	11.8
1084	18:18:03	26.524	75.425	138
1085	18:18:04	26.524	76.07	224.7
1086	18:18:05	26.524	76.362	145.8
1087	18:18:06	26.5	76.533	185.3
1088	18:18:07	26.524	76.713	138
1089	18:18:08	26.524	76.801	82.8
1090	18:18:09	26.5	77.088	145.8
1091	18:18:10	26.5	77.234	153.7
1092	18:18:11	26.5	77.408	114.3
1093	18:18:12	26.5	77.7	106.4
1094	18:18:13	26.5	77.961	114.3
1095	18:18:14	26.5	78.165	51.2
1096	18:18:15	26.524	78.286	59.1
1097	18:18:16	26.5	78.31	43.4
1098	18:18:17	26.5	78.31	59.1
1099	18:18:18	26.5	78.339	59.1
1100	18:18:19	26.5	78.513	130.1
1101	18:18:20	26.5	78.774	122.2
1102	18:18:21	26.475	78.914	122.2
1103	18:18:22	26.475	79.03	138
1104	18:18:23	26.475	79.261	138
1105	18:18:24	26.475	79.464	153.7
1106	18:18:25	26.475	79.493	145.8
1107	18:18:26	26.475	79.55	153.7
1108	18:18:27	26.475	79.377	153.7
1109	18:18:28	26.475	79.319	153.7
1110	18:18:29	26.451	79.43	138
1111	18:18:30	26.475	79.521	122.2
1112	18:18:31	26.451	79.603	122.2
1113	18:18:32	26.451	79.632	114.3
1114	18:18:33	26.451	79.603	114.3
1115	18:18:34	26.451	79.516	106.4
1116	18:18:35	26.451	79.516	106.4
1117	18:18:36	26.451	79.488	59.1
1118	18:18:37	26.451	79.459	35.5
1119	18:18:38	26.426	79.511	59.1
1120	18:18:39	26.426	79.829	90.7
1121	18:18:40	26.426	79.916	59.1
1122	18:18:41	26.426	79.887	35.5
1123	18:18:42	26.426	79.858	59.1
1124	18:18:43	26.402	79.766	74.9
1125	18:18:44	26.378	79.761	74.9
1126	18:18:45	26.378	79.819	82.8
1127	18:18:46	26.378	79.79	90.7
1128	18:18:47	26.353	79.756	90.7
1129	18:18:48	26.329	79.722	74.9
1130	18:18:49	26.329	79.578	59.1
1131	18:18:50	26.329	79.578	35.5
1132	18:18:51	26.304	79.515	27.6
1133	18:18:52	26.304	79.486	51.2
1134	18:18:53	26.304	79.457	74.9
1135	18:18:54	26.304	79.37	59.1
1136	18:18:55	26.304	79.226	43.4
1137	18:18:56	26.28	79.134	3.9
1138	18:18:57	26.28	79.047	74.9
1139	18:18:58	26.28	78.96	3.9
1140	18:18:59	26.28	78.902	11.8
1141	18:19:00	26.256	78.868	27.6
1142	18:19:01	26.256	78.868	51.2
1143	18:19:02	26.256	78.811	67
1144	18:19:03	26.256	78.782	106.4
1145	18:19:04	26.231	78.748	90.7
1146	18:19:05	26.231	78.69	98.5
1147	18:19:06	26.231	78.632	114.3
1148	18:19:07	26.231	78.574	106.4
1149	18:19:08	26.207	78.511	74.9
1150	18:19:09	26.207	78.482	35.5
1151	18:19:10	26.207	78.482	19.7
1152	18:19:11	26.207	78.54	19.7
1153	18:19:12	26.182	78.622	35.5
1154	18:19:13	26.182	78.68	43.4
1155	18:19:14	26.158	78.733	59.1
1156	18:19:15	26.158	78.79	67
1157	18:19:16	26.158	78.79	67
1158	18:19:17	26.158	78.79	67
1159	18:19:18	26.158	78.79	82.8
1160	18:19:19	26.134	78.785	74.9
1161	18:19:20	26.109	78.78	59.1
1162	18:19:21	26.085	78.891	74.9
1163	18:19:22	26.085	79.007	82.8
1164	18:19:23	26.085	79.065	106.4
1165	18:19:24	26.061	79.059	106.4
1166	18:19:25	26.061	79.002	67
1167	18:19:26	26.036	78.852	67
1168	18:19:27	26.036	78.707	43.4
1169	18:19:28	26.012	78.587	59.1
1170	18:19:29	26.012	78.442	59.1
1171	18:19:30	26.012	78.355	27.6
1172	18:19:31	25.987	78.292	35.5
1173	18:19:32	25.987	78.205	27.6
1174	18:19:33	25.963	78.113	3.9
1175	18:19:34	25.963	77.997	3.9
1176	18:19:35	25.963	77.881	11.8
1177	18:19:36	25.963	77.707	11.8
1178	18:19:37	25.963	77.561	3.9
1179	18:19:38	25.914	77.435	3.9
1180	18:19:39	25.914	77.348	3.9
1181	18:19:40	25.914	77.319	43.4
1182	18:19:41	25.914	77.29	19.7
1183	18:19:42	25.89	77.256	35.5
1184	18:19:43	25.89	77.168	59.1
1185	18:19:44	25.89	77.168	67
1186	18:19:45	25.866	77.251	35.5
1187	18:19:46	25.841	77.304	74.9
1188	18:19:47	25.841	77.333	51.2
1189	18:19:48	25.841	77.333	74.9
1190	18:19:49	25.841	77.391	82.8
1191	18:19:50	25.841	77.478	82.8
1192	18:19:51	25.841	77.566	90.7
1193	18:19:52	25.841	77.653	90.7
1194	18:19:53	25.841	77.711	106.4
1195	18:19:54	25.841	77.74	43.4
1196	18:19:55	25.817	77.793	114.3
1197	18:19:56	25.817	77.793	122.2
1198	18:19:57	25.817	77.822	130.1
1199	18:19:58	25.817	77.851	114.3
1200	18:19:59	25.817	77.88	114.3
1201	18:20:00	25.817	77.938	114.3
1202	18:20:01	25.817	77.996	114.3
1203	18:20:02	25.817	78.141	122.2
1204	18:20:03	25.817	78.402	122.2
1205	18:20:04	25.793	78.628	114.3
1206	18:20:05	25.793	78.773	106.4
1207	18:20:06	25.793	78.946	106.4
1208	18:20:07	25.793	79.033	27.6
1209	18:20:08	25.793	79.062	35.5
1210	18:20:09	25.768	79.057	138
1211	18:20:10	25.768	79.085	35.5
1212	18:20:11	25.768	79.143	51.2
1213	18:20:12	25.744	79.282	59.1
1214	18:20:13	25.744	79.398	82.8
1215	18:20:14	25.744	79.571	90.7
1216	18:20:15	25.744	79.744	98.5
1217	18:20:16	25.744	79.859	106.4
1218	18:20:17	25.744	79.916	106.4
1219	18:20:18	25.744	79.916	106.4
1220	18:20:19	25.744	79.916	106.4
1221	18:20:20	25.72	79.911	98.5
1222	18:20:21	25.72	79.911	106.4
1223	18:20:22	25.72	79.911	106.4
1224	18:20:23	25.72	79.969	98.5
1225	18:20:24	25.72	79.969	98.5
1226	18:20:25	25.695	79.992	98.5
1227	18:20:26	25.72	80.026	98.5
1228	18:20:27	25.695	80.021	98.5
1229	18:20:28	25.695	80.021	98.5
1230	18:20:29	25.695	79.992	98.5
1231	18:20:30	25.695	80.021	98.5
1232	18:20:31	25.695	80.021	98.5
1233	18:20:32	25.671	80.074	98.5
1234	18:20:33	25.671	80.102	98.5
1235	18:20:34	25.671	80.16	98.5
1236	18:20:35	25.671	80.189	98.5
1237	18:20:36	25.671	80.246	98.5
1238	18:20:37	25.671	80.332	98.5
1239	18:20:38	25.647	80.413	98.5
1240	18:20:39	25.647	80.442	98.5
1241	18:20:40	25.647	80.471	98.5
1242	18:20:41	25.647	80.528	98.5
1243	18:20:42	25.647	80.557	98.5
1244	18:20:43	25.623	80.609	98.5
1245	18:20:44	25.623	80.666	98.5
1246	18:20:45	25.623	80.724	98.5
1247	18:20:46	25.623	80.752	98.5
1248	18:20:47	25.623	80.781	98.5
1249	18:20:48	25.598	80.805	98.5
1250	18:20:49	25.598	80.862	98.5
1251	18:20:50	25.598	80.862	98.5
1252	18:20:51	25.598	80.891	90.7
1253	18:20:52	25.598	80.919	90.7
1254	18:20:53	25.574	80.914	90.7
1255	18:20:54	25.574	80.971	82.8
1256	18:20:55	25.574	81	82.8
1257	18:20:56	25.574	81.029	90.7
1258	18:20:57	25.574	81.086	90.7
1259	18:20:58	25.574	81.086	90.7
1260	18:20:59	25.574	81.115	90.7
1261	18:21:00	25.55	81.138	90.7
1262	18:21:01	25.55	81.138	90.7
1263	18:21:02	25.55	81.138	74.9
1264	18:21:03	25.525	81.19	82.8
1265	18:21:04	25.525	81.219	82.8
1266	18:21:05	25.525	81.219	82.8
1267	18:21:06	25.525	81.247	82.8
1268	18:21:07	25.525	81.247	82.8
1269	18:21:08	25.525	81.247	90.7
1270	18:21:09	25.525	81.276	90.7
1271	18:21:10	25.501	81.328	82.8
1272	18:21:11	25.501	81.385	90.7
1273	18:21:12	25.501	81.414	90.7
1274	18:21:13	25.501	81.471	90.7
1275	18:21:14	25.477	81.523	90.7
1276	18:21:15	25.501	81.557	90.7
1277	18:21:16	25.477	81.58	82.8
1278	18:21:17	25.477	81.58	82.8
1279	18:21:18	25.477	81.637	74.9
1280	18:21:19	25.477	81.666	74.9
1281	18:21:20	25.477	81.694	82.8
1282	18:21:21	25.453	81.746	82.8
1283	18:21:22	25.453	81.746	82.8
1284	18:21:23	25.453	81.775	90.7
1285	18:21:24	25.453	81.775	90.7
1286	18:21:25	25.453	81.803	82.8
1287	18:21:26	25.453	81.803	90.7
1288	18:21:27	25.428	81.826	90.7
1289	18:21:28	25.428	81.855	90.7
1290	18:21:29	25.428	81.855	82.8
1291	18:21:30	25.428	81.883	82.8
1292	18:21:31	25.428	81.912	90.7
1293	18:21:32	25.404	81.992	90.7
1294	18:21:33	25.404	82.021	82.8
1295	18:21:34	25.404	82.106	82.8
1296	18:21:35	25.404	82.106	82.8
1297	18:21:36	25.404	82.135	82.8
1298	18:21:37	25.404	82.163	82.8
1299	18:21:38	25.404	82.192	82.8
1300	18:21:39	25.38	82.215	82.8
1301	18:21:40	25.38	82.244	82.8
1302	18:21:41	25.38	82.244	82.8
1303	18:21:42	25.38	82.244	82.8
1304	18:21:43	25.38	82.215	82.8
1305	18:21:44	25.38	82.244	82.8
1306	18:21:45	25.355	82.238	82.8
1307	18:21:46	25.355	82.238	82.8
1308	18:21:47	25.355	82.238	82.8
1309	18:21:48	25.355	82.238	82.8
1310	18:21:49	25.355	82.238	82.8
1311	18:21:50	25.331	82.29	82.8
1312	18:21:51	25.331	82.318	82.8
1313	18:21:52	25.331	82.347	82.8
1314	18:21:53	25.331	82.375	82.8
1315	18:21:54	25.331	82.404	82.8
1316	18:21:55	25.331	82.404	82.8
1317	18:21:56	25.331	82.432	82.8
1318	18:21:57	25.307	82.455	82.8
1319	18:21:58	25.307	82.512	82.8
1320	18:21:59	25.307	82.569	82.8
1321	18:22:00	25.307	82.598	82.8
1322	18:22:01	25.307	82.626	82.8
1323	18:22:02	25.307	82.655	82.8
1324	18:22:03	25.283	82.649	82.8
1325	18:22:04	25.283	82.678	82.8
1326	18:22:05	25.283	82.678	82.8
1327	18:22:06	25.283	82.678	82.8
1328	18:22:07	25.283	82.706	82.8
1329	18:22:08	25.283	82.706	82.8
1330	18:22:09	25.258	82.672	74.9
1331	18:22:10	25.258	82.672	74.9
1332	18:22:11	25.258	82.701	82.8
1333	18:22:12	25.258	82.672	82.8
1334	18:22:13	25.258	82.701	82.8
1335	18:22:14	25.234	82.696	74.9
1336	18:22:15	25.234	82.724	82.8
1337	18:22:16	25.234	82.724	82.8
1338	18:22:17	25.234	82.752	82.8
1339	18:22:18	25.234	82.781	82.8
1340	18:22:19	25.234	82.838	74.9
1341	18:22:20	25.234	82.894	74.9
1342	18:22:21	25.234	82.951	74.9
1343	18:22:22	25.21	82.974	74.9
1344	18:22:23	25.21	83.003	74.9
1345	18:22:24	25.21	83.059	67
1346	18:22:25	25.21	83.088	74.9
1347	18:22:26	25.21	83.059	74.9
1348	18:22:27	25.21	83.059	74.9
1349	18:22:28	25.186	83.054	74.9
1350	18:22:29	25.186	83.082	74.9
1351	18:22:30	25.186	83.111	74.9
1352	18:22:31	25.186	83.139	74.9
1353	18:22:32	25.186	83.167	67
1354	18:22:33	25.186	83.224	74.9
1355	18:22:34	25.186	83.253	74.9
1356	18:22:35	25.162	83.247	74.9
1357	18:22:36	25.162	83.276	74.9
1358	18:22:37	25.162	83.276	74.9
1359	18:22:38	25.162	83.304	74.9
1360	18:22:39	25.162	83.332	74.9
1361	18:22:40	25.162	83.332	74.9
1362	18:22:41	25.162	83.389	74.9
1363	18:22:42	25.137	83.384	74.9
1364	18:22:43	25.137	83.44	74.9
1365	18:22:44	25.137	83.469	74.9
1366	18:22:45	25.137	83.469	74.9
1367	18:22:46	25.137	83.525	74.9
1368	18:22:47	25.137	83.553	74.9
1369	18:22:48	25.113	83.605	74.9
1370	18:22:49	25.113	83.661	74.9
1371	18:22:50	25.113	83.69	74.9
1372	18:22:51	25.113	83.718	74.9
1373	18:22:52	25.113	83.746	74.9
1374	18:22:53	25.113	83.803	74.9
1375	18:22:54	25.113	83.831	74.9
1376	18:22:55	25.089	83.882	74.9
1377	18:22:56	25.089	83.939	74.9
1378	18:22:57	25.089	83.939	74.9
1379	18:22:58	25.089	83.939	74.9
1380	18:22:59	25.089	83.939	74.9
1381	18:23:00	25.089	83.995	74.9
1382	18:23:01	25.065	83.99	74.9
1383	18:23:02	25.065	84.018	74.9
1384	18:23:03	25.065	84.046	74.9
1385	18:23:04	25.065	84.046	74.9
1386	18:23:05	25.065	84.046	67
1387	18:23:06	25.065	84.046	67
1388	18:23:07	25.065	84.046	67
1389	18:23:08	25.04	84.041	67
1390	18:23:09	25.04	84.041	67
1391	18:23:10	25.04	84.041	59.1
1392	18:23:11	25.04	84.041	67
1393	18:23:12	25.04	84.069	67
1394	18:23:13	25.04	84.041	67
1395	18:23:14	25.04	84.013	67
1396	18:23:15	25.016	84.036	67
1397	18:23:16	25.016	84.064	59.1
1398	18:23:17	25.016	84.064	59.1
1399	18:23:18	25.016	84.092	67
1400	18:23:19	25.016	84.092	67
1401	18:23:20	25.016	84.092	67
1402	18:23:21	25.016	84.149	67
1403	18:23:22	24.992	84.143	67
1404	18:23:23	24.992	84.171	67
1405	18:23:24	24.992	84.171	67
1406	18:23:25	24.992	84.143	67
1407	18:23:26	24.992	84.171	67
1408	18:23:27	24.968	84.194	67
1409	18:23:28	24.968	84.194	67
1410	18:23:29	24.968	84.222	67
1411	18:23:30	24.968	84.251	67
1412	18:23:31	24.944	84.245	67
1413	18:23:32	24.944	84.273	67
1414	18:23:33	24.944	84.273	67
1415	18:23:34	24.944	84.302	59.1
1416	18:23:35	24.944	84.302	67
1417	18:23:36	24.944	84.302	67
1418	18:23:37	24.944	84.273	67
1419	18:23:38	24.919	84.296	67
1420	18:23:39	24.919	84.296	67
1421	18:23:40	24.919	84.353	67
1422	18:23:41	24.919	84.381	67
1423	18:23:42	24.919	84.437	67
1424	18:23:43	24.919	84.465	67
1425	18:23:44	24.919	84.522	67
1426	18:23:45	24.919	84.522	67
1427	18:23:46	24.895	84.516	67
1428	18:23:47	24.895	84.516	67
1429	18:23:48	24.895	84.545	67
1430	18:23:49	24.895	84.573	67
1431	18:23:50	24.895	84.601	67
1432	18:23:51	24.895	84.601	67
1433	18:23:52	24.895	84.629	67
1434	18:23:53	24.895	84.685	67
1435	18:23:54	24.871	84.68	67
1436	18:23:55	24.871	84.736	67
1437	18:23:56	24.871	84.764	67
1438	18:23:57	24.871	84.793	67
1439	18:23:58	24.871	84.821	67
1440	18:23:59	24.871	84.849	67
1441	18:24:00	24.871	84.849	67
1442	18:24:01	24.871	84.877	67
1443	18:24:02	24.847	84.9	67
1444	18:24:03	24.847	84.9	67
1445	18:24:04	24.847	84.9	67
1446	18:24:05	24.847	84.928	59.1
1447	18:24:06	24.847	84.928	67
1448	18:24:07	24.847	84.928	67
1449	18:24:08	24.847	84.956	59.1
1450	18:24:09	24.823	84.95	59.1
1451	18:24:10	24.823	84.979	59.1
1452	18:24:11	24.823	85.007	59.1
1453	18:24:12	24.823	85.063	59.1
1454	18:24:13	24.823	85.091	59.1
1455	18:24:14	24.823	85.119	67
1456	18:24:15	24.823	85.119	59.1
1457	18:24:16	24.823	85.119	59.1
1458	18:24:17	24.798	85.142	59.1
1459	18:24:18	24.798	85.142	59.1
1460	18:24:19	24.798	85.142	59.1
1461	18:24:20	24.798	85.17	59.1
1462	18:24:21	24.798	85.17	59.1
1463	18:24:22	24.798	85.198	59.1
1464	18:24:23	24.798	85.198	59.1
1465	18:24:24	24.798	85.17	59.1
1466	18:24:25	24.798	85.142	59.1
1467	18:24:26	24.774	85.136	59.1
1468	18:24:27	24.774	85.136	59.1
1469	18:24:28	24.774	85.136	59.1
1470	18:24:29	24.774	85.136	59.1
1471	18:24:30	24.774	85.108	59.1
1472	18:24:31	24.774	85.136	59.1
1473	18:24:32	24.774	85.136	59.1
1474	18:24:33	24.75	85.131	59.1
1475	18:24:34	24.75	85.131	59.1
1476	18:24:35	24.75	85.159	59.1
1477	18:24:36	24.75	85.187	59.1
1478	18:24:37	24.75	85.215	59.1
1479	18:24:38	24.75	85.243	59.1
1480	18:24:39	24.75	85.271	59.1
1481	18:24:40	24.75	85.271	59.1
1482	18:24:41	24.726	85.294	51.2
1483	18:24:42	24.75	85.299	59.1
1484	18:24:43	24.726	85.322	59.1
1485	18:24:44	24.726	85.322	59.1
1486	18:24:45	24.726	85.322	59.1
1487	18:24:46	24.726	85.322	59.1
1488	18:24:47	24.726	85.322	59.1
1489	18:24:48	24.726	85.322	51.2
1490	18:24:49	24.702	85.317	59.1
1491	18:24:50	24.726	85.35	51.2
1492	18:24:51	24.702	85.345	59.1
1493	18:24:52	24.702	85.345	51.2
1494	18:24:53	24.702	85.345	51.2
1495	18:24:54	24.702	85.317	51.2
1496	18:24:55	24.702	85.317	51.2
1497	18:24:56	24.702	85.26	51.2
1498	18:24:57	24.702	85.232	51.2
1499	18:24:58	24.677	85.227	51.2
1500	18:24:59	24.677	85.199	51.2
1501	18:25:00	24.677	85.199	51.2
1502	18:25:01	24.677	85.199	51.2
1503	18:25:02	24.677	85.143	51.2
1504	18:25:03	24.677	85.143	51.2
1505	18:25:04	24.677	85.115	51.2
1506	18:25:05	24.677	85.086	51.2
1507	18:25:06	24.677	85.086	51.2
1508	18:25:07	24.677	85.115	51.2
1509	18:25:08	24.653	85.109	51.2
1510	18:25:09	24.653	85.137	51.2
1511	18:25:10	24.677	85.171	51.2
1512	18:25:11	24.653	85.193	51.2
1513	18:25:12	24.653	85.249	51.2
1514	18:25:13	24.653	85.362	51.2
1515	18:25:14	24.653	85.446	51.2
1516	18:25:15	24.653	85.558	51.2
1517	18:25:16	24.653	85.642	51.2
1518	18:25:17	24.653	85.726	51.2
1519	18:25:18	24.653	85.81	51.2
1520	18:25:19	24.653	85.894	51.2
1521	18:25:20	24.653	85.95	51.2
1522	18:25:21	24.653	86.006	51.2
1523	18:25:22	24.653	86.062	51.2
1524	18:25:23	24.629	86.084	51.2
1525	18:25:24	24.629	86.112	51.2
1526	18:25:25	24.629	86.14	51.2
1527	18:25:26	24.629	86.168	51.2
1528	18:25:27	24.629	86.196	51.2
1529	18:25:28	24.629	86.196	51.2
1530	18:25:29	24.605	86.191	51.2
1531	18:25:30	24.605	86.191	43.4
1532	18:25:31	24.605	86.191	51.2
1533	18:25:32	24.605	86.191	51.2
1534	18:25:33	24.605	86.191	51.2
1535	18:25:34	24.605	86.163	43.4
1536	18:25:35	24.605	86.191	51.2
1537	18:25:36	24.605	86.191	51.2
1538	18:25:37	24.605	86.219	43.4
1539	18:25:38	24.605	86.247	43.4
1540	18:25:39	24.605	86.247	43.4
1541	18:25:40	24.605	86.303	51.2
1542	18:25:41	24.581	86.297	43.4
1543	18:25:42	24.581	86.325	43.4
1544	18:25:43	24.581	86.353	43.4
1545	18:25:44	24.581	86.353	43.4
1546	18:25:45	24.581	86.381	43.4
1547	18:25:46	24.581	86.409	43.4
1548	18:25:47	24.581	86.465	43.4
1549	18:25:48	24.557	86.459	43.4
1550	18:25:49	24.557	86.459	43.4
1551	18:25:50	24.557	86.487	43.4
1552	18:25:51	24.557	86.515	43.4
1553	18:25:52	24.557	86.515	43.4
1554	18:25:53	24.557	86.515	43.4
1555	18:25:54	24.557	86.543	43.4
1556	18:25:55	24.557	86.571	43.4
1557	18:25:56	24.532	86.565	43.4
1558	18:25:57	24.557	86.571	43.4
1559	18:25:58	24.532	86.593	43.4
1560	18:25:59	24.532	86.565	43.4
1561	18:26:00	24.532	86.593	43.4
1562	18:26:01	24.532	86.593	43.4
1563	18:26:02	24.532	86.621	43.4
1564	18:26:03	24.508	86.615	43.4
1565	18:26:04	24.508	86.643	43.4
1566	18:26:05	24.508	86.671	43.4
1567	18:26:06	24.508	86.699	43.4
1568	18:26:07	24.508	86.727	43.4
1569	18:26:08	24.508	86.727	43.4
1570	18:26:09	24.508	86.727	43.4
1571	18:26:10	24.508	86.755	43.4
1572	18:26:11	24.508	86.727	43.4
1573	18:26:12	24.508	86.755	43.4
1574	18:26:13	24.484	86.721	43.4
1575	18:26:14	24.484	86.721	43.4
1576	18:26:15	24.484	86.721	43.4
1577	18:26:16	24.484	86.777	43.4
1578	18:26:17	24.484	86.777	35.5
1579	18:26:18	24.484	86.833	43.4
1580	18:26:19	24.484	86.861	43.4
1581	18:26:20	24.484	86.833	35.5
1582	18:26:21	24.46	86.855	35.5
1583	18:26:22	24.46	86.883	43.4
1584	18:26:23	24.46	86.883	35.5
1585	18:26:24	24.46	86.883	43.4
1586	18:26:25	24.46	86.911	43.4
1587	18:26:26	24.436	86.933	35.5
1588	18:26:27	24.46	86.939	43.4
1589	18:26:28	24.436	86.933	35.5
1590	18:26:29	24.436	86.933	35.5
1591	18:26:30	24.436	86.905	35.5
1592	18:26:31	24.436	86.933	35.5
1593	18:26:32	24.436	86.933	35.5
1594	18:26:33	24.436	86.933	35.5
1595	18:26:34	24.436	86.933	43.4
1596	18:26:35	24.436	86.933	35.5
1597	18:26:36	24.436	86.933	35.5
1598	18:26:37	24.412	86.928	35.5
1599	18:26:38	24.412	86.928	35.5
1600	18:26:39	24.412	86.928	35.5
1601	18:26:40	24.412	86.928	35.5
1602	18:26:41	24.412	86.928	35.5
1603	18:26:42	24.412	86.928	35.5
1604	18:26:43	24.412	86.928	35.5
1605	18:26:44	24.412	86.928	35.5
1606	18:26:45	24.412	86.928	35.5
1607	18:26:46	24.388	86.922	35.5
1608	18:26:47	24.388	86.978	35.5
1609	18:26:48	24.388	86.978	35.5
1610	18:26:49	24.388	86.978	35.5
1611	18:26:50	24.388	86.978	35.5
1612	18:26:51	24.388	86.978	35.5
1613	18:26:52	24.388	86.978	35.5
1614	18:26:53	24.388	86.978	35.5
1615	18:26:54	24.363	86.972	35.5
1616	18:26:55	24.363	86.944	35.5
1617	18:26:56	24.363	86.944	35.5
1618	18:26:57	24.363	86.972	35.5
1619	18:26:58	24.363	86.972	35.5
1620	18:26:59	24.363	86.972	35.5
1621	18:27:00	24.363	86.972	35.5
1622	18:27:01	24.363	87	35.5
1623	18:27:02	24.363	87.028	35.5
1624	18:27:03	24.339	87.05	35.5
1625	18:27:04	24.339	87.05	35.5
1626	18:27:05	24.339	87.078	35.5
1627	18:27:06	24.339	87.078	35.5
1628	18:27:07	24.339	87.078	35.5
1629	18:27:08	24.339	87.078	35.5
1630	18:27:09	24.339	87.078	35.5
1631	18:27:10	24.339	87.078	35.5
1632	18:27:11	24.339	87.078	35.5
1633	18:27:12	24.339	87.106	35.5
1634	18:27:13	24.339	87.134	35.5
1635	18:27:14	24.339	87.134	35.5
1636	18:27:15	24.315	87.184	35.5
1637	18:27:16	24.315	87.184	35.5
1638	18:27:17	24.315	87.211	35.5
1639	18:27:18	24.315	87.211	35.5
1640	18:27:19	24.315	87.211	35.5
1641	18:27:20	24.315	87.239	35.5
1642	18:27:21	24.315	87.239	35.5
1643	18:27:22	24.315	87.239	35.5
1644	18:27:23	24.315	87.239	35.5
1645	18:27:24	24.315	87.267	35.5
1646	18:27:25	24.315	87.295	35.5
1647	18:27:26	24.291	87.317	35.5
1648	18:27:27	24.291	87.317	35.5
1649	18:27:28	24.291	87.345	35.5
1650	18:27:29	24.291	87.373	27.6
1651	18:27:30	24.291	87.373	35.5
1652	18:27:31	24.291	87.4	35.5
1653	18:27:32	24.291	87.4	35.5
1654	18:27:33	24.291	87.4	35.5
1655	18:27:34	24.291	87.428	35.5
1656	18:27:35	24.291	87.428	35.5
1657	18:27:36	24.267	87.45	35.5
1658	18:27:37	24.267	87.45	27.6
1659	18:27:38	24.267	87.45	27.6
1660	18:27:39	24.267	87.423	27.6
1661	18:27:40	24.267	87.423	35.5
1662	18:27:41	24.267	87.395	35.5
1663	18:27:42	24.267	87.395	35.5
1664	18:27:43	24.267	87.395	35.5
1665	18:27:44	24.267	87.395	27.6
1666	18:27:45	24.243	87.389	27.6
1667	18:27:46	24.243	87.389	35.5
1668	18:27:47	24.243	87.361	27.6
1669	18:27:48	24.243	87.361	27.6
1670	18:27:49	24.243	87.389	35.5
1671	18:27:50	24.243	87.389	27.6
1672	18:27:51	24.243	87.389	27.6
1673	18:27:52	24.243	87.389	27.6
1674	18:27:53	24.243	87.389	27.6
1675	18:27:54	24.243	87.389	27.6
1676	18:27:55	24.243	87.389	27.6
1677	18:27:56	24.243	87.389	27.6
1678	18:27:57	24.243	87.389	27.6
1679	18:27:58	24.243	87.389	27.6
1680	18:27:59	24.219	87.384	27.6
1681	18:28:00	24.219	87.356	27.6
1682	18:28:01	24.219	87.384	27.6
1683	18:28:02	24.219	87.356	27.6
1684	18:28:03	24.219	87.356	27.6
1685	18:28:04	24.243	87.389	27.6
1686	18:28:05	24.219	87.384	27.6
1687	18:28:06	24.219	87.411	27.6
1688	18:28:07	24.219	87.439	27.6
1689	18:28:08	24.219	87.467	27.6
1690	18:28:09	24.219	87.495	27.6
1691	18:28:10	24.219	87.495	27.6
1692	18:28:11	24.219	87.523	27.6
1693	18:28:12	24.219	87.55	27.6
1694	18:28:13	24.219	87.55	27.6
1695	18:28:14	24.219	87.578	27.6
1696	18:28:15	24.195	87.6	27.6
1697	18:28:16	24.219	87.634	27.6
1698	18:28:17	24.195	87.656	27.6
1699	18:28:18	24.195	87.656	27.6
1700	18:28:19	24.195	87.683	27.6
1701	18:28:20	24.195	87.683	27.6
1702	18:28:21	24.195	87.711	27.6
1703	18:28:22	24.195	87.739	27.6
1704	18:28:23	24.195	87.767	27.6
1705	18:28:24	24.195	87.767	27.6
1706	18:28:25	24.195	87.794	27.6
1707	18:28:26	24.195	87.822	27.6
1708	18:28:27	24.171	87.816	27.6
1709	18:28:28	24.171	87.872	27.6
1710	18:28:29	24.171	87.927	27.6
1711	18:28:30	24.171	87.927	27.6
1712	18:28:31	24.171	87.983	27.6
1713	18:28:32	24.171	87.983	27.6
1714	18:28:33	24.171	88.038	27.6
1715	18:28:34	24.171	88.038	27.6
1716	18:28:35	24.171	88.066	27.6
1717	18:28:36	24.171	88.093	27.6
1718	18:28:37	24.146	88.088	27.6
1719	18:28:38	24.146	88.088	27.6
1720	18:28:39	24.146	88.116	27.6
1721	18:28:40	24.146	88.116	27.6
1722	18:28:41	24.146	88.143	27.6
1723	18:28:42	24.146	88.116	27.6
1724	18:28:43	24.146	88.143	27.6
1725	18:28:44	24.146	88.116	27.6
1726	18:28:45	24.146	88.143	27.6
1727	18:28:46	24.122	88.11	27.6
1728	18:28:47	24.122	88.138	27.6
1729	18:28:48	24.146	88.143	27.6
1730	18:28:49	24.122	88.138	27.6
1731	18:28:50	24.122	88.138	27.6
1732	18:28:51	24.122	88.138	27.6
1733	18:28:52	24.122	88.138	27.6
1734	18:28:53	24.122	88.138	19.7
1735	18:28:54	24.122	88.165	19.7
1736	18:28:55	24.122	88.193	27.6
1737	18:28:56	24.122	88.193	27.6
1738	18:28:57	24.122	88.193	19.7
1739	18:28:58	24.098	88.215	27.6
1740	18:28:59	24.122	88.248	19.7
1741	18:29:00	24.098	88.243	19.7
1742	18:29:01	24.098	88.27	27.6
1743	18:29:02	24.098	88.298	19.7
1744	18:29:03	24.098	88.298	19.7
1745	18:29:04	24.098	88.353	27.6
1746	18:29:05	24.098	88.381	27.6
1747	18:29:06	24.098	88.408	19.7
1748	18:29:07	24.098	88.436	19.7
1749	18:29:08	24.098	88.464	19.7
1750	18:29:09	24.074	88.486	19.7
1751	18:29:10	24.074	88.513	19.7
1752	18:29:11	24.074	88.513	19.7
1753	18:29:12	24.074	88.541	27.6
1754	18:29:13	24.074	88.569	19.7
1755	18:29:14	24.074	88.569	19.7
1756	18:29:15	24.074	88.596	19.7
1757	18:29:16	24.074	88.624	19.7
1758	18:29:17	24.074	88.651	19.7
1759	18:29:18	24.074	88.651	19.7
1760	18:29:19	24.074	88.679	19.7
1761	18:29:20	24.074	88.679	19.7
1762	18:29:21	24.05	88.673	19.7
1763	18:29:22	24.05	88.701	19.7
1764	18:29:23	24.05	88.701	19.7
1765	18:29:24	24.05	88.701	19.7
1766	18:29:25	24.05	88.729	19.7
1767	18:29:26	24.05	88.729	19.7
1768	18:29:27	24.05	88.729	19.7
1769	18:29:28	24.05	88.756	19.7
1770	18:29:29	24.05	88.756	19.7
1771	18:29:30	24.05	88.784	19.7
1772	18:29:31	24.05	88.784	19.7
1773	18:29:32	24.026	88.778	19.7
1774	18:29:33	24.026	88.778	19.7
1775	18:29:34	24.026	88.778	19.7
1776	18:29:35	24.026	88.778	19.7
1777	18:29:36	24.026	88.778	19.7
1778	18:29:37	24.026	88.778	19.7
1779	18:29:38	24.026	88.778	19.7
1780	18:29:39	24.026	88.751	19.7
1781	18:29:40	24.026	88.778	19.7
1782	18:29:41	24.026	88.751	19.7
1783	18:29:42	24.026	88.751	19.7
1784	18:29:43	24.002	88.717	19.7
1785	18:29:44	24.002	88.717	19.7
1786	18:29:45	24.002	88.662	19.7
1787	18:29:46	24.002	88.662	19.7
1788	18:29:47	24.002	88.634	19.7
1789	18:29:48	24.002	88.634	19.7
1790	18:29:49	24.002	88.607	19.7
1791	18:29:50	24.002	88.607	19.7
1792	18:29:51	24.002	88.634	19.7
1793	18:29:52	24.002	88.634	19.7
1794	18:29:53	24.002	88.634	19.7
1795	18:29:54	24.002	88.634	19.7
1796	18:29:55	23.978	88.656	19.7
1797	18:29:56	23.978	88.656	19.7
1798	18:29:57	23.978	88.656	19.7
1799	18:29:58	23.978	88.656	19.7
1800	18:29:59	23.978	88.656	19.7
1801	18:30:00	23.978	88.656	19.7		Temp-av	temp-std	RH-av	Rh-std	Intensity, Lux-av	Int-std
1802	18:30:01	23.978	88.712	19.7		23.3251	0.330521	92.5237	1.57663	6.5645	4.21743
1803	18:30:02	23.978	88.712	19.7
1804	18:30:03	23.978	88.712	19.7
1805	18:30:04	23.978	88.684	19.7
1806	18:30:05	23.978	88.684	19.7
1807	18:30:06	23.954	88.651	19.7
1808	18:30:07	23.978	88.656	19.7
1809	18:30:08	23.954	88.651	19.7
1810	18:30:09	23.954	88.595	19.7
1811	18:30:10	23.954	88.595	19.7
1812	18:30:11	23.954	88.568	19.7
1813	18:30:12	23.954	88.54	19.7
1814	18:30:13	23.954	88.513	19.7
1815	18:30:14	23.954	88.513	19.7
1816	18:30:15	23.954	88.485	19.7
1817	18:30:16	23.954	88.485	19.7
1818	18:30:17	23.954	88.485	19.7
1819	18:30:18	23.954	88.513	19.7
1820	18:30:19	23.954	88.513	19.7
1821	18:30:20	23.954	88.54	19.7
1822	18:30:21	23.954	88.54	19.7
1823	18:30:22	23.954	88.54	19.7
1824	18:30:23	23.954	88.54	19.7
1825	18:30:24	23.954	88.568	19.7
1826	18:30:25	23.93	88.562	19.7
1827	18:30:26	23.93	88.59	19.7
1828	18:30:27	23.93	88.59	19.7
1829	18:30:28	23.93	88.59	19.7
1830	18:30:29	23.954	88.595	19.7
1831	18:30:30	23.93	88.59	19.7
1832	18:30:31	23.93	88.562	19.7
1833	18:30:32	23.93	88.59	19.7
1834	18:30:33	23.93	88.59	19.7
1835	18:30:34	23.93	88.59	19.7
1836	18:30:35	23.93	88.617	19.7
1837	18:30:36	23.93	88.645	19.7
1838	18:30:37	23.93	88.645	19.7
1839	18:30:38	23.93	88.673	19.7
1840	18:30:39	23.93	88.7	19.7
1841	18:30:40	23.93	88.7	19.7
1842	18:30:41	23.93	88.755	19.7
1843	18:30:42	23.93	88.783	19.7
1844	18:30:43	23.93	88.811	19.7
1845	18:30:44	23.93	88.866	11.8
1846	18:30:45	23.93	88.921	19.7
1847	18:30:46	23.93	89.031	19.7
1848	18:30:47	23.93	89.114	19.7
1849	18:30:48	23.93	89.196	19.7
1850	18:30:49	23.93	89.306	11.8
1851	18:30:50	23.93	89.362	19.7
1852	18:30:51	23.93	89.472	19.7
1853	18:30:52	23.93	89.499	19.7
1854	18:30:53	23.93	89.554	19.7
1855	18:30:54	23.93	89.582	19.7
1856	18:30:55	23.93	89.609	19.7
1857	18:30:56	23.905	89.603	11.8
1858	18:30:57	23.905	89.631	11.8
1859	18:30:58	23.93	89.637	11.8
1860	18:30:59	23.905	89.631	11.8
1861	18:31:00	23.905	89.686	11.8
1862	18:31:01	23.905	89.686	11.8
1863	18:31:02	23.905	89.686	19.7
1864	18:31:03	23.905	89.713	11.8
1865	18:31:04	23.905	89.713	19.7
1866	18:31:05	23.905	89.741	11.8
1867	18:31:06	23.905	89.741	11.8
1868	18:31:07	23.905	89.741	19.7
1869	18:31:08	23.905	89.713	11.8
1870	18:31:09	23.881	89.707	19.7
1871	18:31:10	23.905	89.713	11.8
1872	18:31:11	23.881	89.735	11.8
1873	18:31:12	23.881	89.707	11.8
1874	18:31:13	23.881	89.707	11.8
1875	18:31:14	23.881	89.735	11.8
1876	18:31:15	23.881	89.707	11.8
1877	18:31:16	23.881	89.707	11.8
1878	18:31:17	23.881	89.68	11.8
1879	18:31:18	23.881	89.68	11.8
1880	18:31:19	23.857	89.674	11.8
1881	18:31:20	23.857	89.674	3.9
1882	18:31:21	23.857	89.674	11.8
1883	18:31:22	23.857	89.702	11.8
1884	18:31:23	23.857	89.757	11.8
1885	18:31:24	23.857	89.757	3.9
1886	18:31:25	23.857	89.784	3.9
1887	18:31:26	23.857	89.757	3.9
1888	18:31:27	23.857	89.784	11.8
1889	18:31:28	23.857	89.839	3.9
1890	18:31:29	23.857	89.894	3.9
1891	18:31:30	23.857	89.894	3.9
1892	18:31:31	23.857	89.894	3.9
1893	18:31:32	23.857	89.921	11.8
1894	18:31:33	23.857	89.894	3.9
1895	18:31:34	23.857	89.949	3.9
1896	18:31:35	23.857	89.976	3.9
1897	18:31:36	23.857	90.004	3.9
1898	18:31:37	23.833	90.053	3.9
1899	18:31:38	23.833	90.08	11.8
1900	18:31:39	23.833	90.108	3.9
1901	18:31:40	23.833	90.162	3.9
1902	18:31:41	23.833	90.19	11.8
1903	18:31:42	23.833	90.245	3.9
1904	18:31:43	23.833	90.272	3.9
1905	18:31:44	23.833	90.327	3.9
1906	18:31:45	23.833	90.354	3.9
1907	18:31:46	23.833	90.382	3.9
1908	18:31:47	23.833	90.436	3.9
1909	18:31:48	23.833	90.436	3.9
1910	18:31:49	23.833	90.491	11.8
1911	18:31:50	23.833	90.519	3.9
1912	18:31:51	23.833	90.519	3.9
1913	18:31:52	23.833	90.546	11.8
1914	18:31:53	23.833	90.546	3.9
1915	18:31:54	23.833	90.573	3.9
1916	18:31:55	23.833	90.573	3.9
1917	18:31:56	23.833	90.601	3.9
1918	18:31:57	23.833	90.601	3.9
1919	18:31:58	23.833	90.628	3.9
1920	18:31:59	23.833	90.655	3.9
1921	18:32:00	23.833	90.655	3.9
1922	18:32:01	23.833	90.655	3.9
1923	18:32:02	23.833	90.71	3.9
1924	18:32:03	23.833	90.71	3.9
1925	18:32:04	23.833	90.71	3.9
1926	18:32:05	23.833	90.737	11.8
1927	18:32:06	23.833	90.765	3.9
1928	18:32:07	23.833	90.765	3.9
1929	18:32:08	23.833	90.792	11.8
1930	18:32:09	23.833	90.765	3.9
1931	18:32:10	23.833	90.792	3.9
1932	18:32:11	23.833	90.792	3.9
1933	18:32:12	23.833	90.765	3.9
1934	18:32:13	23.833	90.765	3.9
1935	18:32:14	23.833	90.765	3.9
1936	18:32:15	23.833	90.765	3.9
1937	18:32:16	23.833	90.765	3.9
1938	18:32:17	23.833	90.765	3.9
1939	18:32:18	23.833	90.765	3.9
1940	18:32:19	23.833	90.765	11.8
1941	18:32:20	23.833	90.71	11.8
1942	18:32:21	23.833	90.71	11.8
1943	18:32:22	23.833	90.683	11.8
1944	18:32:23	23.833	90.655	11.8
1945	18:32:24	23.833	90.655	11.8
1946	18:32:25	23.833	90.601	11.8
1947	18:32:26	23.833	90.628	11.8
1948	18:32:27	23.833	90.601	11.8
1949	18:32:28	23.833	90.628	11.8
1950	18:32:29	23.833	90.628	11.8
1951	18:32:30	23.833	90.601	11.8
1952	18:32:31	23.833	90.628	11.8
1953	18:32:32	23.833	90.655	11.8
1954	18:32:33	23.833	90.628	11.8
1955	18:32:34	23.833	90.628	11.8
1956	18:32:35	23.833	90.628	11.8
1957	18:32:36	23.833	90.628	11.8
1958	18:32:37	23.833	90.601	11.8
1959	18:32:38	23.833	90.628	11.8
1960	18:32:39	23.833	90.601	11.8
1961	18:32:40	23.833	90.601	11.8
1962	18:32:41	23.833	90.601	11.8
1963	18:32:42	23.833	90.601	11.8
1964	18:32:43	23.833	90.573	11.8
1965	18:32:44	23.833	90.573	11.8
1966	18:32:45	23.833	90.546	11.8
1967	18:32:46	23.833	90.519	11.8
1968	18:32:47	23.833	90.491	11.8
1969	18:32:48	23.833	90.491	11.8
1970	18:32:49	23.833	90.464	11.8
1971	18:32:50	23.833	90.436	11.8
1972	18:32:51	23.833	90.436	11.8
1973	18:32:52	23.833	90.436	11.8
1974	18:32:53	23.833	90.436	11.8
1975	18:32:54	23.833	90.409	11.8
1976	18:32:55	23.833	90.409	11.8
1977	18:32:56	23.833	90.409	11.8
1978	18:32:57	23.833	90.409	11.8
1979	18:32:58	23.833	90.436	11.8
1980	18:32:59	23.833	90.436	11.8
1981	18:33:00	23.833	90.464	11.8
1982	18:33:01	23.833	90.464	11.8
1983	18:33:02	23.833	90.491	11.8
1984	18:33:03	23.833	90.491	11.8
1985	18:33:04	23.833	90.546	11.8
1986	18:33:05	23.833	90.546	11.8
1987	18:33:06	23.833	90.573	11.8
1988	18:33:07	23.833	90.601	11.8
1989	18:33:08	23.833	90.601	11.8
1990	18:33:09	23.833	90.628	11.8
1991	18:33:10	23.833	90.655	11.8
1992	18:33:11	23.833	90.655	11.8
1993	18:33:12	23.833	90.655	11.8
1994	18:33:13	23.857	90.716	11.8
1995	18:33:14	23.833	90.71	11.8
1996	18:33:15	23.833	90.71	11.8
1997	18:33:16	23.833	90.71	11.8
1998	18:33:17	23.833	90.71	11.8
1999	18:33:18	23.833	90.71	11.8
2000	18:33:19	23.833	90.71	11.8
2001	18:33:20	23.833	90.71	11.8
2002	18:33:21	23.833	90.71	11.8
2003	18:33:22	23.833	90.71	11.8
2004	18:33:23	23.833	90.71	11.8
2005	18:33:24	23.833	90.71	11.8
2006	18:33:25	23.833	90.683	11.8
2007	18:33:26	23.833	90.683	11.8
2008	18:33:27	23.833	90.655	11.8
2009	18:33:28	23.833	90.655	11.8
2010	18:33:29	23.833	90.655	11.8
2011	18:33:30	23.833	90.655	11.8
2012	18:33:31	23.833	90.683	11.8
2013	18:33:32	23.833	90.71	11.8
2014	18:33:33	23.833	90.71	11.8
2015	18:33:34	23.833	90.71	11.8
2016	18:33:35	23.833	90.737	11.8
2017	18:33:36	23.833	90.71	11.8
2018	18:33:37	23.833	90.737	11.8
2019	18:33:38	23.833	90.71	11.8
2020	18:33:39	23.833	90.737	11.8
2021	18:33:40	23.833	90.765	11.8
2022	18:33:41	23.833	90.765	11.8
2023	18:33:42	23.833	90.765	11.8
2024	18:33:43	23.833	90.765	11.8
2025	18:33:44	23.833	90.819	11.8
2026	18:33:45	23.833	90.819	11.8
2027	18:33:46	23.833	90.819	11.8
2028	18:33:47	23.833	90.847	11.8
2029	18:33:48	23.833	90.847	11.8
2030	18:33:49	23.833	90.847	11.8
2031	18:33:50	23.833	90.874	11.8
2032	18:33:51	23.833	90.847	11.8
2033	18:33:52	23.833	90.874	11.8
2034	18:33:53	23.833	90.874	11.8
2035	18:33:54	23.833	90.874	11.8
2036	18:33:55	23.833	90.874	11.8
2037	18:33:56	23.833	90.929	11.8
2038	18:33:57	23.833	90.929	11.8
2039	18:33:58	23.833	90.929	11.8
2040	18:33:59	23.833	90.929	11.8
2041	18:34:00	23.833	90.929	11.8
2042	18:34:01	23.833	90.956	11.8
2043	18:34:02	23.833	90.929	11.8
2044	18:34:03	23.833	90.929	11.8
2045	18:34:04	23.833	90.929	11.8
2046	18:34:05	23.809	90.923	11.8
2047	18:34:06	23.809	90.95	11.8
2048	18:34:07	23.809	90.978	11.8
2049	18:34:08	23.809	90.95	11.8
2050	18:34:09	23.809	90.95	11.8
2051	18:34:10	23.809	90.95	11.8
2052	18:34:11	23.809	90.95	11.8
2053	18:34:12	23.809	90.923	11.8
2054	18:34:13	23.809	90.923	3.9
2055	18:34:14	23.809	90.923	11.8
2056	18:34:15	23.809	90.923	3.9
2057	18:34:16	23.809	90.923	11.8
2058	18:34:17	23.809	90.923	11.8
2059	18:34:18	23.809	90.923	11.8
2060	18:34:19	23.809	90.896	11.8
2061	18:34:20	23.809	90.868	11.8
2062	18:34:21	23.809	90.868	11.8
2063	18:34:22	23.809	90.868	11.8
2064	18:34:23	23.809	90.868	11.8
2065	18:34:24	23.809	90.923	11.8
2066	18:34:25	23.809	90.978	11.8
2067	18:34:26	23.809	90.978	11.8
2068	18:34:27	23.809	90.978	11.8
2069	18:34:28	23.809	90.923	11.8
2070	18:34:29	23.809	90.896	11.8
2071	18:34:30	23.809	90.868	11.8
2072	18:34:31	23.809	90.841	11.8
2073	18:34:32	23.809	90.814	11.8
2074	18:34:33	23.809	90.814	3.9
2075	18:34:34	23.809	90.786	11.8
2076	18:34:35	23.809	90.759	11.8
2077	18:34:36	23.809	90.759	11.8
2078	18:34:37	23.809	90.759	11.8
2079	18:34:38	23.785	90.753	11.8
2080	18:34:39	23.809	90.732	11.8
2081	18:34:40	23.785	90.726	11.8
2082	18:34:41	23.785	90.726	11.8
2083	18:34:42	23.785	90.726	11.8
2084	18:34:43	23.785	90.698	11.8
2085	18:34:44	23.785	90.698	11.8
2086	18:34:45	23.785	90.726	11.8
2087	18:34:46	23.785	90.698	11.8
2088	18:34:47	23.785	90.698	11.8
2089	18:34:48	23.785	90.698	11.8
2090	18:34:49	23.785	90.698	11.8
2091	18:34:50	23.785	90.671	11.8
2092	18:34:51	23.785	90.644	11.8
2093	18:34:52	23.785	90.644	11.8
2094	18:34:53	23.785	90.644	3.9
2095	18:34:54	23.785	90.644	11.8
2096	18:34:55	23.785	90.644	11.8
2097	18:34:56	23.785	90.644	11.8
2098	18:34:57	23.785	90.616	11.8
2099	18:34:58	23.785	90.616	11.8
2100	18:34:59	23.785	90.644	11.8
2101	18:35:00	23.785	90.644	11.8
2102	18:35:01	23.785	90.644	11.8
2103	18:35:02	23.785	90.644	11.8
2104	18:35:03	23.785	90.644	11.8
2105	18:35:04	23.785	90.644	11.8
2106	18:35:05	23.785	90.644	11.8
2107	18:35:06	23.761	90.693	11.8
2108	18:35:07	23.785	90.671	3.9
2109	18:35:08	23.761	90.693	11.8
2110	18:35:09	23.761	90.693	11.8
2111	18:35:10	23.785	90.698	3.9
2112	18:35:11	23.761	90.72	3.9
2113	18:35:12	23.761	90.72	11.8
2114	18:35:13	23.761	90.747	11.8
2115	18:35:14	23.761	90.747	11.8
2116	18:35:15	23.761	90.747	11.8
2117	18:35:16	23.761	90.747	11.8
2118	18:35:17	23.761	90.775	11.8
2119	18:35:18	23.761	90.775	11.8
2120	18:35:19	23.761	90.775	11.8
2121	18:35:20	23.761	90.802	11.8
2122	18:35:21	23.761	90.802	11.8
2123	18:35:22	23.761	90.802	11.8
2124	18:35:23	23.761	90.802	11.8
2125	18:35:24	23.761	90.802	11.8
2126	18:35:25	23.761	90.802	3.9
2127	18:35:26	23.761	90.802	11.8
2128	18:35:27	23.761	90.829	11.8
2129	18:35:28	23.761	90.857	11.8
2130	18:35:29	23.761	90.857	11.8
2131	18:35:30	23.761	90.857	11.8
2132	18:35:31	23.761	90.857	11.8
2133	18:35:32	23.761	90.857	11.8
2134	18:35:33	23.761	90.857	11.8
2135	18:35:34	23.737	90.851	11.8
2136	18:35:35	23.761	90.857	11.8
2137	18:35:36	23.737	90.851	11.8
2138	18:35:37	23.761	90.857	11.8
2139	18:35:38	23.737	90.851	11.8
2140	18:35:39	23.737	90.851	11.8
2141	18:35:40	23.737	90.851	11.8
2142	18:35:41	23.737	90.851	11.8
2143	18:35:42	23.737	90.878	3.9
2144	18:35:43	23.737	90.878	11.8
2145	18:35:44	23.737	90.878	11.8
2146	18:35:45	23.737	90.878	11.8
2147	18:35:46	23.737	90.878	11.8
2148	18:35:47	23.737	90.878	11.8
2149	18:35:48	23.737	90.851	11.8
2150	18:35:49	23.737	90.878	11.8
2151	18:35:50	23.737	90.851	3.9
2152	18:35:51	23.737	90.851	3.9
2153	18:35:52	23.737	90.851	3.9
2154	18:35:53	23.737	90.851	3.9
2155	18:35:54	23.737	90.823	11.8
2156	18:35:55	23.737	90.823	11.8
2157	18:35:56	23.737	90.796	11.8
2158	18:35:57	23.737	90.796	11.8
2159	18:35:58	23.737	90.796	11.8
2160	18:35:59	23.737	90.796	3.9
2161	18:36:00	23.737	90.796	3.9
2162	18:36:01	23.737	90.796	11.8
2163	18:36:02	23.713	90.79	11.8
2164	18:36:03	23.737	90.796	3.9
2165	18:36:04	23.737	90.796	11.8
2166	18:36:05	23.713	90.79	11.8
2167	18:36:06	23.713	90.79	3.9
2168	18:36:07	23.713	90.79	3.9
2169	18:36:08	23.713	90.79	11.8
2170	18:36:09	23.713	90.818	3.9
2171	18:36:10	23.713	90.845	11.8
2172	18:36:11	23.713	90.845	3.9
2173	18:36:12	23.713	90.845	11.8
2174	18:36:13	23.713	90.872	11.8
2175	18:36:14	23.713	90.9	11.8
2176	18:36:15	23.713	90.872	11.8
2177	18:36:16	23.713	90.9	11.8
2178	18:36:17	23.713	90.9	11.8
2179	18:36:18	23.713	90.9	3.9
2180	18:36:19	23.713	90.9	11.8
2181	18:36:20	23.713	90.9	11.8
2182	18:36:21	23.713	90.9	11.8
2183	18:36:22	23.713	90.9	11.8
2184	18:36:23	23.713	90.9	11.8
2185	18:36:24	23.713	90.9	11.8
2186	18:36:25	23.713	90.9	3.9
2187	18:36:26	23.713	90.9	11.8
2188	18:36:27	23.713	90.872	3.9
2189	18:36:28	23.713	90.9	11.8
2190	18:36:29	23.713	90.9	11.8
2191	18:36:30	23.713	90.9	3.9
2192	18:36:31	23.713	90.9	11.8
2193	18:36:32	23.689	90.866	3.9
2194	18:36:33	23.713	90.872	11.8
2195	18:36:34	23.689	90.866	3.9
2196	18:36:35	23.689	90.866	11.8
2197	18:36:36	23.689	90.866	11.8
2198	18:36:37	23.689	90.894	11.8
2199	18:36:38	23.689	90.894	11.8
2200	18:36:39	23.689	90.894	11.8
2201	18:36:40	23.689	90.894	11.8
2202	18:36:41	23.689	90.894	11.8
2203	18:36:42	23.689	90.866	11.8
2204	18:36:43	23.689	90.866	11.8
2205	18:36:44	23.689	90.839	3.9
2206	18:36:45	23.689	90.839	11.8
2207	18:36:46	23.689	90.839	3.9
2208	18:36:47	23.689	90.839	11.8
2209	18:36:48	23.689	90.839	11.8
2210	18:36:49	23.689	90.839	11.8
2211	18:36:50	23.689	90.839	11.8
2212	18:36:51	23.689	90.839	3.9
2213	18:36:52	23.689	90.839	11.8
2214	18:36:53	23.689	90.839	11.8
2215	18:36:54	23.689	90.839	3.9
2216	18:36:55	23.689	90.839	3.9
2217	18:36:56	23.665	90.833	11.8
2218	18:36:57	23.665	90.833	11.8
2219	18:36:58	23.665	90.861	11.8
2220	18:36:59	23.665	90.861	11.8
2221	18:37:00	23.665	90.861	11.8
2222	18:37:01	23.665	90.888	3.9
2223	18:37:02	23.665	90.888	11.8
2224	18:37:03	23.665	90.888	3.9
2225	18:37:04	23.665	90.915	11.8
2226	18:37:05	23.665	90.888	11.8
2227	18:37:06	23.665	90.888	11.8
2228	18:37:07	23.665	90.915	3.9
2229	18:37:08	23.665	90.942	3.9
2230	18:37:09	23.665	90.942	11.8
2231	18:37:10	23.665	90.942	11.8
2232	18:37:11	23.665	90.942	11.8
2233	18:37:12	23.665	90.942	11.8
2234	18:37:13	23.665	90.942	11.8
2235	18:37:14	23.665	90.942	11.8
2236	18:37:15	23.665	90.97	11.8
2237	18:37:16	23.665	90.97	11.8
2238	18:37:17	23.665	90.997	3.9
2239	18:37:18	23.665	90.997	3.9
2240	18:37:19	23.665	90.997	3.9
2241	18:37:20	23.665	90.997	3.9
2242	18:37:21	23.665	90.997	3.9
2243	18:37:22	23.665	90.997	3.9
2244	18:37:23	23.665	90.997	11.8
2245	18:37:24	23.665	90.997	11.8
2246	18:37:25	23.665	91.024	11.8
2247	18:37:26	23.665	91.024	11.8
2248	18:37:27	23.665	90.997	11.8
2249	18:37:28	23.665	90.997	3.9
2250	18:37:29	23.665	91.024	11.8
2251	18:37:30	23.665	90.997	3.9
2252	18:37:31	23.665	90.997	11.8
2253	18:37:32	23.641	90.991	3.9
2254	18:37:33	23.641	90.991	3.9
2255	18:37:34	23.641	90.991	11.8
2256	18:37:35	23.641	90.991	11.8
2257	18:37:36	23.641	90.991	11.8
2258	18:37:37	23.641	90.991	11.8
2259	18:37:38	23.641	90.991	11.8
2260	18:37:39	23.641	90.991	11.8
2261	18:37:40	23.641	90.991	11.8
2262	18:37:41	23.641	90.991	11.8
2263	18:37:42	23.641	90.991	11.8
2264	18:37:43	23.641	91.019	11.8
2265	18:37:44	23.641	91.019	11.8
2266	18:37:45	23.641	91.046	11.8
2267	18:37:46	23.641	91.046	3.9
2268	18:37:47	23.641	91.073	11.8
2269	18:37:48	23.641	91.073	3.9
2270	18:37:49	23.641	91.073	3.9
2271	18:37:50	23.641	91.073	3.9
2272	18:37:51	23.641	91.1	11.8
2273	18:37:52	23.641	91.073	3.9
2274	18:37:53	23.641	91.073	3.9
2275	18:37:54	23.641	91.073	11.8
2276	18:37:55	23.641	91.046	3.9
2277	18:37:56	23.641	91.046	3.9
2278	18:37:57	23.641	91.046	11.8
2279	18:37:58	23.641	90.991	3.9
2280	18:37:59	23.641	90.991	3.9
2281	18:38:00	23.617	90.985	3.9
2282	18:38:01	23.617	90.985	11.8
2283	18:38:02	23.617	90.985	11.8
2284	18:38:03	23.641	91.019	3.9
2285	18:38:04	23.617	91.04	11.8
2286	18:38:05	23.617	91.04	11.8
2287	18:38:06	23.617	91.04	3.9
2288	18:38:07	23.617	91.067	3.9
2289	18:38:08	23.617	91.095	11.8
2290	18:38:09	23.617	91.095	11.8
2291	18:38:10	23.617	91.095	3.9
2292	18:38:11	23.617	91.122	3.9
2293	18:38:12	23.617	91.149	11.8
2294	18:38:13	23.617	91.176	11.8
2295	18:38:14	23.617	91.176	11.8
2296	18:38:15	23.617	91.204	3.9
2297	18:38:16	23.617	91.231	11.8
2298	18:38:17	23.617	91.258	11.8
2299	18:38:18	23.617	91.258	11.8
2300	18:38:19	23.617	91.258	11.8
2301	18:38:20	23.617	91.258	11.8
2302	18:38:21	23.617	91.258	11.8
2303	18:38:22	23.617	91.258	11.8
2304	18:38:23	23.617	91.258	11.8
2305	18:38:24	23.617	91.258	3.9
2306	18:38:25	23.617	91.258	3.9
2307	18:38:26	23.617	91.258	3.9
2308	18:38:27	23.593	91.28	3.9
2309	18:38:28	23.617	91.313	11.8
2310	18:38:29	23.617	91.313	11.8
2311	18:38:30	23.617	91.313	3.9
2312	18:38:31	23.593	91.307	11.8
2313	18:38:32	23.593	91.307	11.8
2314	18:38:33	23.593	91.307	11.8
2315	18:38:34	23.593	91.334	3.9
2316	18:38:35	23.593	91.361	11.8
2317	18:38:36	23.593	91.389	3.9
2318	18:38:37	23.593	91.416	3.9
2319	18:38:38	23.617	91.476	3.9
2320	18:38:39	23.593	91.47	11.8
2321	18:38:40	23.593	91.47	11.8
2322	18:38:41	23.593	91.498	11.8
2323	18:38:42	23.593	91.525	11.8
2324	18:38:43	23.593	91.525	11.8
2325	18:38:44	23.593	91.579	11.8
2326	18:38:45	23.593	91.552	3.9
2327	18:38:46	23.593	91.579	11.8
2328	18:38:47	23.593	91.579	11.8
2329	18:38:48	23.593	91.579	3.9
2330	18:38:49	23.593	91.579	3.9
2331	18:38:50	23.593	91.579	11.8
2332	18:38:51	23.593	91.579	11.8
2333	18:38:52	23.593	91.579	11.8
2334	18:38:53	23.593	91.579	3.9
2335	18:38:54	23.593	91.579	11.8
2336	18:38:55	23.593	91.579	3.9
2337	18:38:56	23.593	91.579	3.9
2338	18:38:57	23.569	91.573	11.8
2339	18:38:58	23.593	91.579	11.8
2340	18:38:59	23.569	91.573	3.9
2341	18:39:00	23.569	91.573	11.8
2342	18:39:01	23.569	91.546	11.8
2343	18:39:02	23.569	91.546	11.8
2344	18:39:03	23.569	91.519	11.8
2345	18:39:04	23.569	91.519	11.8
2346	18:39:05	23.569	91.519	11.8
2347	18:39:06	23.569	91.519	3.9
2348	18:39:07	23.569	91.519	3.9
2349	18:39:08	23.569	91.519	3.9
2350	18:39:09	23.569	91.519	3.9
2351	18:39:10	23.569	91.519	3.9
2352	18:39:11	23.569	91.519	11.8
2353	18:39:12	23.569	91.519	3.9
2354	18:39:13	23.569	91.519	11.8
2355	18:39:14	23.569	91.546	11.8
2356	18:39:15	23.569	91.573	11.8
2357	18:39:16	23.569	91.573	3.9
2358	18:39:17	23.569	91.601	11.8
2359	18:39:18	23.569	91.628	3.9
2360	18:39:19	23.569	91.628	11.8
2361	18:39:20	23.569	91.628	3.9
2362	18:39:21	23.569	91.628	3.9
2363	18:39:22	23.545	91.649	3.9
2364	18:39:23	23.545	91.649	3.9
2365	18:39:24	23.545	91.676	3.9
2366	18:39:25	23.545	91.676	3.9
2367	18:39:26	23.545	91.676	3.9
2368	18:39:27	23.545	91.676	3.9
2369	18:39:28	23.545	91.676	3.9
2370	18:39:29	23.545	91.676	11.8
2371	18:39:30	23.545	91.676	3.9
2372	18:39:31	23.545	91.676	3.9
2373	18:39:32	23.545	91.676	3.9
2374	18:39:33	23.545	91.676	3.9
2375	18:39:34	23.545	91.676	3.9
2376	18:39:35	23.545	91.676	3.9
2377	18:39:36	23.545	91.676	3.9
2378	18:39:37	23.545	91.676	11.8
2379	18:39:38	23.521	91.67	11.8
2380	18:39:39	23.545	91.649	3.9
2381	18:39:40	23.521	91.67	11.8
2382	18:39:41	23.521	91.67	3.9
2383	18:39:42	23.521	91.67	11.8
2384	18:39:43	23.521	91.67	11.8
2385	18:39:44	23.521	91.67	11.8
2386	18:39:45	23.521	91.698	11.8
2387	18:39:46	23.521	91.698	11.8
2388	18:39:47	23.521	91.698	11.8
2389	18:39:48	23.521	91.698	11.8
2390	18:39:49	23.521	91.698	11.8
2391	18:39:50	23.521	91.698	11.8
2392	18:39:51	23.521	91.725	3.9
2393	18:39:52	23.521	91.725	3.9
2394	18:39:53	23.521	91.725	3.9
2395	18:39:54	23.521	91.725	11.8
2396	18:39:55	23.521	91.725	3.9
2397	18:39:56	23.497	91.719	3.9
2398	18:39:57	23.521	91.725	11.8
2399	18:39:58	23.497	91.719	11.8
2400	18:39:59	23.497	91.746	3.9
2401	18:40:00	23.497	91.719	3.9
2402	18:40:01	23.497	91.719	3.9
2403	18:40:02	23.497	91.719	11.8
2404	18:40:03	23.497	91.719	11.8
2405	18:40:04	23.497	91.719	3.9
2406	18:40:05	23.497	91.719	3.9
2407	18:40:06	23.497	91.719	3.9
2408	18:40:07	23.497	91.719	3.9
2409	18:40:08	23.497	91.719	3.9
2410	18:40:09	23.497	91.692	11.8
2411	18:40:10	23.497	91.719	3.9
2412	18:40:11	23.497	91.719	3.9
2413	18:40:12	23.497	91.719	11.8
2414	18:40:13	23.497	91.719	3.9
2415	18:40:14	23.472	91.713	11.8
2416	18:40:15	23.472	91.713	11.8
2417	18:40:16	23.472	91.713	11.8
2418	18:40:17	23.472	91.767	3.9
2419	18:40:18	23.472	91.767	3.9
2420	18:40:19	23.472	91.767	3.9
2421	18:40:20	23.472	91.767	3.9
2422	18:40:21	23.472	91.767	3.9
2423	18:40:22	23.472	91.74	3.9
2424	18:40:23	23.472	91.713	3.9
2425	18:40:24	23.472	91.713	11.8
2426	18:40:25	23.472	91.713	3.9
2427	18:40:26	23.472	91.713	3.9
2428	18:40:27	23.472	91.713	11.8
2429	18:40:28	23.472	91.713	3.9
2430	18:40:29	23.472	91.713	3.9
2431	18:40:30	23.472	91.713	3.9
2432	18:40:31	23.472	91.713	11.8
2433	18:40:32	23.472	91.713	3.9
2434	18:40:33	23.472	91.686	11.8
2435	18:40:34	23.448	91.707	3.9
2436	18:40:35	23.448	91.707	3.9
2437	18:40:36	23.472	91.713	3.9
2438	18:40:37	23.448	91.707	3.9
2439	18:40:38	23.448	91.734	3.9
2440	18:40:39	23.448	91.734	3.9
2441	18:40:40	23.448	91.761	3.9
2442	18:40:41	23.448	91.734	3.9
2443	18:40:42	23.448	91.761	3.9
2444	18:40:43	23.448	91.761	3.9
2445	18:40:44	23.448	91.761	3.9
2446	18:40:45	23.448	91.761	3.9
2447	18:40:46	23.448	91.761	11.8
2448	18:40:47	23.448	91.761	3.9
2449	18:40:48	23.448	91.789	11.8
2450	18:40:49	23.448	91.789	11.8
2451	18:40:50	23.448	91.789	11.8
2452	18:40:51	23.448	91.761	11.8
2453	18:40:52	23.448	91.789	3.9
2454	18:40:53	23.448	91.789	3.9
2455	18:40:54	23.424	91.81	3.9
2456	18:40:55	23.448	91.816	3.9
2457	18:40:56	23.448	91.843	3.9
2458	18:40:57	23.424	91.864	3.9
2459	18:40:58	23.424	91.864	3.9
2460	18:40:59	23.424	91.864	11.8
2461	18:41:00	23.424	91.864	11.8
2462	18:41:01	23.424	91.864	11.8
2463	18:41:02	23.424	91.864	3.9
2464	18:41:03	23.424	91.864	3.9
2465	18:41:04	23.424	91.891	3.9
2466	18:41:05	23.424	91.891	11.8
2467	18:41:06	23.424	91.919	3.9
2468	18:41:07	23.424	91.919	3.9
2469	18:41:08	23.424	91.919	3.9
2470	18:41:09	23.424	91.919	11.8
2471	18:41:10	23.424	91.919	3.9
2472	18:41:11	23.424	91.919	3.9
2473	18:41:12	23.424	91.919	3.9
2474	18:41:13	23.424	91.919	3.9
2475	18:41:14	23.424	91.891	3.9
2476	18:41:15	23.424	91.891	3.9
2477	18:41:16	23.4	91.886	3.9
2478	18:41:17	23.4	91.858	3.9
2479	18:41:18	23.4	91.858	3.9
2480	18:41:19	23.4	91.858	3.9
2481	18:41:20	23.4	91.858	11.8
2482	18:41:21	23.4	91.858	3.9
2483	18:41:22	23.4	91.858	3.9
2484	18:41:23	23.4	91.858	11.8
2485	18:41:24	23.4	91.858	3.9
2486	18:41:25	23.4	91.858	3.9
2487	18:41:26	23.4	91.858	3.9
2488	18:41:27	23.4	91.858	3.9
2489	18:41:28	23.4	91.858	3.9
2490	18:41:29	23.4	91.858	3.9
2491	18:41:30	23.4	91.858	3.9
2492	18:41:31	23.4	91.858	3.9
2493	18:41:32	23.4	91.858	3.9
2494	18:41:33	23.376	91.852	3.9
2495	18:41:34	23.376	91.852	11.8
2496	18:41:35	23.376	91.852	3.9
2497	18:41:36	23.4	91.858	3.9
2498	18:41:37	23.4	91.886	3.9
2499	18:41:38	23.4	91.858	3.9
2500	18:41:39	23.376	91.88	3.9
2501	18:41:40	23.376	91.852	3.9
2502	18:41:41	23.376	91.88	3.9
2503	18:41:42	23.376	91.88	11.8
2504	18:41:43	23.376	91.907	11.8
2505	18:41:44	23.376	91.907	11.8
2506	18:41:45	23.376	91.907	11.8
2507	18:41:46	23.376	91.907	11.8
2508	18:41:47	23.376	91.88	3.9
2509	18:41:48	23.376	91.907	11.8
2510	18:41:49	23.376	91.907	3.9
2511	18:41:50	23.376	91.907	3.9
2512	18:41:51	23.376	91.907	11.8
2513	18:41:52	23.376	91.907	3.9
2514	18:41:53	23.376	91.907	3.9
2515	18:41:54	23.376	91.934	3.9
2516	18:41:55	23.376	91.934	3.9
2517	18:41:56	23.376	91.961	3.9
2518	18:41:57	23.376	91.961	3.9
2519	18:41:58	23.376	91.961	3.9
2520	18:41:59	23.376	91.988	3.9
2521	18:42:00	23.376	91.988	3.9
2522	18:42:01	23.376	92.015	3.9
2523	18:42:02	23.376	92.015	3.9
2524	18:42:03	23.352	92.037	3.9
2525	18:42:04	23.376	92.043	3.9
2526	18:42:05	23.376	92.043	3.9
2527	18:42:06	23.352	92.037	3.9
2528	18:42:07	23.352	92.037	3.9
2529	18:42:08	23.352	92.064	3.9
2530	18:42:09	23.352	92.064	3.9
2531	18:42:10	23.352	92.064	11.8
2532	18:42:11	23.352	92.091	3.9
2533	18:42:12	23.352	92.064	3.9
2534	18:42:13	23.352	92.091	3.9
2535	18:42:14	23.352	92.064	3.9
2536	18:42:15	23.352	92.064	3.9
2537	18:42:16	23.352	92.064	3.9
2538	18:42:17	23.352	92.064	3.9
2539	18:42:18	23.352	92.037	3.9
2540	18:42:19	23.352	92.064	3.9
2541	18:42:20	23.352	92.064	3.9
2542	18:42:21	23.352	92.064	3.9
2543	18:42:22	23.352	92.064	3.9
2544	18:42:23	23.352	92.064	3.9
2545	18:42:24	23.352	92.091	3.9
2546	18:42:25	23.352	92.091	3.9
2547	18:42:26	23.352	92.118	3.9
2548	18:42:27	23.352	92.118	3.9
2549	18:42:28	23.352	92.145	3.9
2550	18:42:29	23.352	92.145	11.8
2551	18:42:30	23.352	92.172	3.9
2552	18:42:31	23.352	92.172	3.9
2553	18:42:32	23.352	92.145	3.9
2554	18:42:33	23.352	92.118	3.9
2555	18:42:34	23.352	92.118	3.9
2556	18:42:35	23.352	92.091	3.9
2557	18:42:36	23.352	92.064	3.9
2558	18:42:37	23.352	92.064	3.9
2559	18:42:38	23.352	92.064	3.9
2560	18:42:39	23.352	92.064	3.9
2561	18:42:40	23.352	92.091	11.8
2562	18:42:41	23.352	92.118	3.9
2563	18:42:42	23.352	92.172	3.9
2564	18:42:43	23.352	92.199	3.9
2565	18:42:44	23.352	92.254	3.9
2566	18:42:45	23.352	92.281	3.9
2567	18:42:46	23.352	92.335	3.9
2568	18:42:47	23.352	92.335	11.8
2569	18:42:48	23.352	92.389	3.9
2570	18:42:49	23.352	92.362	3.9
2571	18:42:50	23.352	92.389	3.9
2572	18:42:51	23.352	92.416	3.9
2573	18:42:52	23.352	92.47	3.9
2574	18:42:53	23.352	92.498	3.9
2575	18:42:54	23.352	92.552	3.9
2576	18:42:55	23.352	92.579	3.9
2577	18:42:56	23.352	92.606	3.9
2578	18:42:57	23.352	92.633	3.9
2579	18:42:58	23.352	92.66	3.9
2580	18:42:59	23.352	92.633	3.9
2581	18:43:00	23.352	92.606	3.9
2582	18:43:01	23.352	92.552	3.9
2583	18:43:02	23.328	92.492	3.9
2584	18:43:03	23.328	92.437	11.8
2585	18:43:04	23.328	92.329	3.9
2586	18:43:05	23.328	92.221	11.8
2587	18:43:06	23.328	92.058	3.9
2588	18:43:07	23.304	91.943	3.9
2589	18:43:08	23.304	91.835	3.9
2590	18:43:09	23.304	91.726	3.9
2591	18:43:10	23.304	91.617	3.9
2592	18:43:11	23.304	91.563	3.9
2593	18:43:12	23.304	91.509	3.9
2594	18:43:13	23.304	91.509	3.9
2595	18:43:14	23.304	91.454	11.8
2596	18:43:15	23.304	91.454	3.9
2597	18:43:16	23.304	91.454	3.9
2598	18:43:17	23.304	91.454	3.9
2599	18:43:18	23.304	91.509	3.9
2600	18:43:19	23.304	91.536	3.9
2601	18:43:20	23.304	91.536	3.9
2602	18:43:21	23.304	91.563	3.9
2603	18:43:22	23.304	91.563	3.9
2604	18:43:23	23.304	91.59	3.9
2605	18:43:24	23.304	91.617	3.9
2606	18:43:25	23.304	91.672	3.9
2607	18:43:26	23.304	91.672	3.9
2608	18:43:27	23.304	91.699	3.9
2609	18:43:28	23.304	91.726	3.9
2610	18:43:29	23.304	91.78	3.9
2611	18:43:30	23.304	91.835	3.9
2612	18:43:31	23.304	91.835	3.9
2613	18:43:32	23.304	91.889	3.9
2614	18:43:33	23.304	91.889	3.9
2615	18:43:34	23.304	91.889	3.9
2616	18:43:35	23.304	91.943	11.8
2617	18:43:36	23.304	91.971	3.9
2618	18:43:37	23.304	91.998	3.9
2619	18:43:38	23.304	92.052	3.9
2620	18:43:39	23.304	92.052	3.9
2621	18:43:40	23.304	91.998	3.9
2622	18:43:41	23.28	91.992	3.9
2623	18:43:42	23.304	91.998	3.9
2624	18:43:43	23.304	91.998	3.9
2625	18:43:44	23.28	91.992	11.8
2626	18:43:45	23.304	91.998	3.9
2627	18:43:46	23.28	91.965	3.9
2628	18:43:47	23.304	91.971	3.9
2629	18:43:48	23.304	91.943	3.9
2630	18:43:49	23.304	91.998	3.9
2631	18:43:50	23.304	92.025	11.8
2632	18:43:51	23.28	91.992	3.9
2633	18:43:52	23.28	91.992	3.9
2634	18:43:53	23.28	91.992	3.9
2635	18:43:54	23.28	91.992	3.9
2636	18:43:55	23.28	91.992	3.9
2637	18:43:56	23.28	91.992	3.9
2638	18:43:57	23.28	91.992	3.9
2639	18:43:58	23.28	91.992	3.9
2640	18:43:59	23.28	91.992	3.9
2641	18:44:00	23.28	92.019	3.9
2642	18:44:01	23.28	92.046	3.9
2643	18:44:02	23.28	92.046	3.9
2644	18:44:03	23.28	92.1	3.9
2645	18:44:04	23.28	92.1	3.9
2646	18:44:05	23.28	92.127	3.9
2647	18:44:06	23.28	92.155	11.8
2648	18:44:07	23.28	92.155	3.9
2649	18:44:08	23.28	92.209	3.9
2650	18:44:09	23.28	92.209	3.9
2651	18:44:10	23.28	92.209	11.8
2652	18:44:11	23.28	92.209	3.9
2653	18:44:12	23.28	92.209	3.9
2654	18:44:13	23.28	92.209	3.9
2655	18:44:14	23.28	92.209	3.9
2656	18:44:15	23.28	92.209	3.9
2657	18:44:16	23.28	92.209	11.8
2658	18:44:17	23.28	92.182	3.9
2659	18:44:18	23.28	92.182	3.9
2660	18:44:19	23.28	92.155	3.9
2661	18:44:20	23.28	92.155	3.9
2662	18:44:21	23.28	92.155	3.9
2663	18:44:22	23.28	92.127	11.8
2664	18:44:23	23.28	92.1	3.9
2665	18:44:24	23.256	92.094	3.9
2666	18:44:25	23.28	92.1	3.9
2667	18:44:26	23.28	92.1	3.9
2668	18:44:27	23.28	92.1	3.9
2669	18:44:28	23.28	92.1	3.9
2670	18:44:29	23.256	92.121	3.9
2671	18:44:30	23.256	92.121	3.9
2672	18:44:31	23.256	92.149	3.9
2673	18:44:32	23.256	92.149	3.9
2674	18:44:33	23.256	92.149	11.8
2675	18:44:34	23.256	92.149	3.9
2676	18:44:35	23.256	92.176	3.9
2677	18:44:36	23.256	92.176	3.9
2678	18:44:37	23.256	92.149	3.9
2679	18:44:38	23.256	92.176	3.9
2680	18:44:39	23.256	92.176	3.9
2681	18:44:40	23.256	92.149	3.9
2682	18:44:41	23.256	92.149	11.8
2683	18:44:42	23.256	92.149	3.9
2684	18:44:43	23.256	92.149	3.9
2685	18:44:44	23.256	92.149	3.9
2686	18:44:45	23.256	92.149	3.9
2687	18:44:46	23.256	92.149	3.9
2688	18:44:47	23.256	92.149	3.9
2689	18:44:48	23.256	92.149	3.9
2690	18:44:49	23.256	92.149	3.9
2691	18:44:50	23.256	92.149	11.8
2692	18:44:51	23.256	92.176	3.9
2693	18:44:52	23.256	92.203	3.9
2694	18:44:53	23.256	92.203	3.9
2695	18:44:54	23.256	92.23	3.9
2696	18:44:55	23.256	92.257	3.9
2697	18:44:56	23.256	92.203	3.9
2698	18:44:57	23.256	92.257	3.9
2699	18:44:58	23.256	92.257	3.9
2700	18:44:59	23.232	92.251	3.9
2701	18:45:00	23.232	92.278	11.8
2702	18:45:01	23.232	92.251	3.9
2703	18:45:02	23.232	92.278	3.9
2704	18:45:03	23.232	92.278	11.8
2705	18:45:04	23.232	92.278	3.9
2706	18:45:05	23.256	92.311	3.9
2707	18:45:06	23.232	92.305	3.9
2708	18:45:07	23.232	92.305	3.9
2709	18:45:08	23.232	92.36	3.9
2710	18:45:09	23.232	92.36	3.9
2711	18:45:10	23.232	92.36	11.8
2712	18:45:11	23.232	92.36	3.9
2713	18:45:12	23.232	92.36	11.8
2714	18:45:13	23.232	92.414	3.9
2715	18:45:14	23.232	92.387	3.9
2716	18:45:15	23.232	92.387	11.8
2717	18:45:16	23.232	92.414	3.9
2718	18:45:17	23.232	92.414	3.9
2719	18:45:18	23.232	92.414	3.9
2720	18:45:19	23.232	92.414	3.9
2721	18:45:20	23.232	92.414	3.9
2722	18:45:21	23.232	92.414	11.8
2723	18:45:22	23.232	92.414	3.9
2724	18:45:23	23.232	92.414	3.9
2725	18:45:24	23.232	92.414	3.9
2726	18:45:25	23.232	92.441	3.9
2727	18:45:26	23.232	92.414	3.9
2728	18:45:27	23.232	92.414	11.8
2729	18:45:28	23.232	92.441	3.9
2730	18:45:29	23.232	92.441	3.9
2731	18:45:30	23.232	92.414	3.9
2732	18:45:31	23.208	92.408	3.9
2733	18:45:32	23.232	92.414	3.9
2734	18:45:33	23.208	92.408	3.9
2735	18:45:34	23.208	92.408	3.9
2736	18:45:35	23.232	92.414	3.9
2737	18:45:36	23.208	92.408	3.9
2738	18:45:37	23.208	92.408	3.9
2739	18:45:38	23.208	92.408	3.9
2740	18:45:39	23.208	92.435	3.9
2741	18:45:40	23.208	92.435	11.8
2742	18:45:41	23.208	92.435	3.9
2743	18:45:42	23.208	92.435	3.9
2744	18:45:43	23.208	92.435	3.9
2745	18:45:44	23.208	92.435	3.9
2746	18:45:45	23.208	92.408	3.9
2747	18:45:46	23.208	92.408	3.9
2748	18:45:47	23.208	92.435	3.9
2749	18:45:48	23.208	92.435	3.9
2750	18:45:49	23.208	92.435	3.9
2751	18:45:50	23.208	92.462	3.9
2752	18:45:51	23.208	92.462	3.9
2753	18:45:52	23.208	92.462	3.9
2754	18:45:53	23.208	92.489	3.9
2755	18:45:54	23.208	92.489	3.9
2756	18:45:55	23.208	92.516	3.9
2757	18:45:56	23.208	92.516	3.9
2758	18:45:57	23.208	92.543	3.9
2759	18:45:58	23.208	92.543	3.9
2760	18:45:59	23.208	92.57	3.9
2761	18:46:00	23.208	92.57	3.9
2762	18:46:01	23.208	92.57	3.9
2763	18:46:02	23.208	92.57	3.9
2764	18:46:03	23.208	92.57	3.9
2765	18:46:04	23.208	92.624	3.9
2766	18:46:05	23.208	92.624	3.9
2767	18:46:06	23.184	92.618	3.9
2768	18:46:07	23.208	92.624	3.9
2769	18:46:08	23.208	92.624	3.9
2770	18:46:09	23.208	92.624	3.9
2771	18:46:10	23.208	92.651	3.9
2772	18:46:11	23.208	92.678	3.9
2773	18:46:12	23.208	92.678	3.9
2774	18:46:13	23.208	92.705	3.9
2775	18:46:14	23.208	92.732	3.9
2776	18:46:15	23.208	92.732	3.9
2777	18:46:16	23.208	92.787	3.9
2778	18:46:17	23.208	92.787	3.9
2779	18:46:18	23.208	92.787	3.9
2780	18:46:19	23.208	92.841	3.9
2781	18:46:20	23.208	92.841	3.9
2782	18:46:21	23.208	92.841	3.9
2783	18:46:22	23.184	92.835	3.9
2784	18:46:23	23.208	92.868	3.9
2785	18:46:24	23.184	92.862	11.8
2786	18:46:25	23.208	92.868	3.9
2787	18:46:26	23.184	92.889	3.9
2788	18:46:27	23.184	92.889	11.8
2789	18:46:28	23.184	92.889	3.9
2790	18:46:29	23.184	92.889	3.9
2791	18:46:30	23.184	92.889	11.8
2792	18:46:31	23.184	92.889	3.9
2793	18:46:32	23.184	92.889	3.9
2794	18:46:33	23.184	92.889	3.9
2795	18:46:34	23.184	92.916	3.9
2796	18:46:35	23.184	92.889	3.9
2797	18:46:36	23.184	92.916	3.9
2798	18:46:37	23.184	92.916	3.9
2799	18:46:38	23.184	92.916	3.9
2800	18:46:39	23.184	92.916	3.9
2801	18:46:40	23.184	92.943	3.9
2802	18:46:41	23.184	92.916	3.9
2803	18:46:42	23.184	92.916	3.9
2804	18:46:43	23.184	92.889	3.9
2805	18:46:44	23.16	92.883	3.9
2806	18:46:45	23.184	92.889	11.8
2807	18:46:46	23.16	92.883	3.9
2808	18:46:47	23.16	92.883	3.9
2809	18:46:48	23.16	92.883	11.8
2810	18:46:49	23.184	92.889	3.9
2811	18:46:50	23.16	92.937	3.9
2812	18:46:51	23.16	92.937	3.9
2813	18:46:52	23.16	92.937	3.9
2814	18:46:53	23.16	92.937	3.9
2815	18:46:54	23.16	92.937	3.9
2816	18:46:55	23.16	92.937	3.9
2817	18:46:56	23.16	92.937	3.9
2818	18:46:57	23.16	92.937	3.9
2819	18:46:58	23.16	92.937	3.9
2820	18:46:59	23.16	92.937	3.9
2821	18:47:00	23.16	92.964	3.9
2822	18:47:01	23.16	92.964	3.9
2823	18:47:02	23.16	92.991	3.9
2824	18:47:03	23.16	92.964	3.9
2825	18:47:04	23.16	92.991	3.9
2826	18:47:05	23.16	92.991	3.9
2827	18:47:06	23.16	92.991	3.9
2828	18:47:07	23.16	93.018	3.9
2829	18:47:08	23.16	93.045	3.9
2830	18:47:09	23.16	93.045	3.9
2831	18:47:10	23.16	93.099	3.9
2832	18:47:11	23.16	93.099	3.9
2833	18:47:12	23.16	93.126	3.9
2834	18:47:13	23.16	93.153	3.9
2835	18:47:14	23.16	93.153	3.9
2836	18:47:15	23.16	93.153	3.9
2837	18:47:16	23.16	93.153	3.9
2838	18:47:17	23.16	93.18	3.9
2839	18:47:18	23.16	93.18	3.9
2840	18:47:19	23.16	93.207	3.9
2841	18:47:20	23.16	93.207	3.9
2842	18:47:21	23.16	93.207	3.9
2843	18:47:22	23.16	93.207	3.9
2844	18:47:23	23.16	93.207	3.9
2845	18:47:24	23.16	93.234	3.9
2846	18:47:25	23.16	93.261	3.9
2847	18:47:26	23.136	93.255	3.9
2848	18:47:27	23.16	93.261	11.8
2849	18:47:28	23.16	93.288	3.9
2850	18:47:29	23.16	93.315	3.9
2851	18:47:30	23.136	93.309	3.9
2852	18:47:31	23.136	93.309	3.9
2853	18:47:32	23.136	93.309	3.9
2854	18:47:33	23.136	93.309	3.9
2855	18:47:34	23.136	93.336	3.9
2856	18:47:35	23.136	93.363	3.9
2857	18:47:36	23.136	93.363	3.9
2858	18:47:37	23.136	93.363	3.9
2859	18:47:38	23.136	93.363	3.9
2860	18:47:39	23.136	93.363	3.9
2861	18:47:40	23.136	93.39	3.9
2862	18:47:41	23.136	93.417	3.9
2863	18:47:42	23.136	93.417	3.9
2864	18:47:43	23.136	93.417	11.8
2865	18:47:44	23.136	93.417	11.8
2866	18:47:45	23.136	93.443	3.9
2867	18:47:46	23.136	93.443	3.9
2868	18:47:47	23.136	93.47	3.9
2869	18:47:48	23.136	93.443	3.9
2870	18:47:49	23.136	93.443	3.9
2871	18:47:50	23.136	93.47	3.9
2872	18:47:51	23.136	93.47	3.9
2873	18:47:52	23.136	93.47	3.9
2874	18:47:53	23.112	93.464	3.9
2875	18:47:54	23.136	93.47	3.9
2876	18:47:55	23.136	93.47	3.9
2877	18:47:56	23.136	93.47	3.9
2878	18:47:57	23.136	93.47	3.9
2879	18:47:58	23.112	93.518	3.9
2880	18:47:59	23.136	93.497	3.9
2881	18:48:00	23.136	93.524	11.8
2882	18:48:01	23.112	93.518	11.8
2883	18:48:02	23.136	93.524	3.9
2884	18:48:03	23.136	93.578	3.9
2885	18:48:04	23.112	93.545	3.9
2886	18:48:05	23.112	93.545	3.9
2887	18:48:06	23.112	93.572	3.9
2888	18:48:07	23.112	93.572	3.9
2889	18:48:08	23.112	93.572	3.9
2890	18:48:09	23.112	93.518	3.9
2891	18:48:10	23.112	93.545	3.9
2892	18:48:11	23.112	93.518	3.9
2893	18:48:12	23.112	93.518	3.9
2894	18:48:13	23.112	93.518	3.9
2895	18:48:14	23.112	93.518	3.9
2896	18:48:15	23.112	93.518	3.9
2897	18:48:16	23.112	93.491	3.9
2898	18:48:17	23.112	93.491	3.9
2899	18:48:18	23.112	93.518	3.9
2900	18:48:19	23.112	93.518	3.9
2901	18:48:20	23.112	93.518	3.9
2902	18:48:21	23.112	93.518	3.9
2903	18:48:22	23.112	93.518	3.9
2904	18:48:23	23.112	93.518	3.9
2905	18:48:24	23.112	93.491	3.9
2906	18:48:25	23.112	93.491	3.9
2907	18:48:26	23.112	93.464	3.9
2908	18:48:27	23.112	93.437	3.9
2909	18:48:28	23.112	93.411	3.9
2910	18:48:29	23.112	93.384	3.9
2911	18:48:30	23.112	93.384	3.9
2912	18:48:31	23.112	93.357	3.9
2913	18:48:32	23.112	93.33	3.9
2914	18:48:33	23.112	93.33	3.9
2915	18:48:34	23.112	93.33	3.9
2916	18:48:35	23.112	93.303	3.9
2917	18:48:36	23.112	93.303	3.9
2918	18:48:37	23.112	93.303	3.9
2919	18:48:38	23.112	93.303	3.9
2920	18:48:39	23.112	93.33	3.9
2921	18:48:40	23.112	93.303	3.9
2922	18:48:41	23.112	93.33	3.9
2923	18:48:42	23.112	93.33	3.9
2924	18:48:43	23.112	93.33	3.9
2925	18:48:44	23.112	93.357	3.9
2926	18:48:45	23.112	93.357	3.9
2927	18:48:46	23.112	93.357	3.9
2928	18:48:47	23.112	93.357	3.9
2929	18:48:48	23.112	93.384	11.8
2930	18:48:49	23.112	93.411	3.9
2931	18:48:50	23.112	93.411	3.9
2932	18:48:51	23.112	93.411	3.9
2933	18:48:52	23.112	93.437	3.9
2934	18:48:53	23.112	93.437	3.9
2935	18:48:54	23.112	93.464	3.9
2936	18:48:55	23.112	93.464	3.9
2937	18:48:56	23.112	93.464	3.9
2938	18:48:57	23.112	93.464	3.9
2939	18:48:58	23.112	93.491	3.9
2940	18:48:59	23.112	93.518	3.9
2941	18:49:00	23.112	93.518	11.8
2942	18:49:01	23.112	93.518	3.9
2943	18:49:02	23.112	93.545	3.9
2944	18:49:03	23.112	93.572	3.9
2945	18:49:04	23.112	93.572	3.9
2946	18:49:05	23.112	93.572	3.9
2947	18:49:06	23.112	93.599	11.8
2948	18:49:07	23.112	93.626	3.9
2949	18:49:08	23.112	93.626	3.9
2950	18:49:09	23.112	93.626	3.9
2951	18:49:10	23.112	93.653	11.8
2952	18:49:11	23.112	93.653	11.8
2953	18:49:12	23.112	93.68	3.9
2954	18:49:13	23.112	93.68	3.9
2955	18:49:14	23.112	93.707	3.9
2956	18:49:15	23.112	93.68	3.9
2957	18:49:16	23.112	93.707	3.9
2958	18:49:17	23.112	93.707	3.9
2959	18:49:18	23.112	93.707	3.9
2960	18:49:19	23.112	93.734	11.8
2961	18:49:20	23.112	93.734	11.8
2962	18:49:21	23.112	93.734	3.9
2963	18:49:22	23.112	93.788	3.9
2964	18:49:23	23.112	93.788	3.9
2965	18:49:24	23.112	93.788	3.9
2966	18:49:25	23.112	93.788	11.8
2967	18:49:26	23.112	93.788	3.9
2968	18:49:27	23.112	93.788	3.9
2969	18:49:28	23.112	93.788	3.9
2970	18:49:29	23.112	93.788	3.9
2971	18:49:30	23.112	93.788	3.9
2972	18:49:31	23.112	93.788	3.9
2973	18:49:32	23.112	93.788	3.9
2974	18:49:33	23.112	93.788	3.9
2975	18:49:34	23.112	93.788	3.9
2976	18:49:35	23.112	93.788	11.8
2977	18:49:36	23.112	93.788	3.9
2978	18:49:37	23.112	93.788	3.9
2979	18:49:38	23.112	93.788	3.9
2980	18:49:39	23.112	93.788	3.9
2981	18:49:40	23.112	93.788	3.9
2982	18:49:41	23.112	93.814	3.9
2983	18:49:42	23.112	93.814	3.9
2984	18:49:43	23.112	93.814	3.9
2985	18:49:44	23.112	93.814	3.9
2986	18:49:45	23.112	93.814	3.9
2987	18:49:46	23.112	93.814	3.9
2988	18:49:47	23.112	93.814	3.9
2989	18:49:48	23.112	93.814	3.9
2990	18:49:49	23.112	93.814	3.9
2991	18:49:50	23.112	93.814	3.9
2992	18:49:51	23.112	93.841	3.9
2993	18:49:52	23.112	93.841	3.9
2994	18:49:53	23.112	93.814	3.9
2995	18:49:54	23.112	93.841	3.9
2996	18:49:55	23.112	93.841	11.8
2997	18:49:56	23.112	93.841	3.9
2998	18:49:57	23.112	93.841	3.9
2999	18:49:58	23.112	93.841	11.8
3000	18:49:59	23.112	93.841	3.9
3001	18:50:00	23.112	93.841	3.9
3002	18:50:01	23.112	93.814	3.9
3003	18:50:02	23.112	93.788	3.9
3004	18:50:03	23.112	93.788	3.9
3005	18:50:04	23.112	93.788	3.9
3006	18:50:05	23.112	93.788	3.9
3007	18:50:06	23.112	93.788	3.9
3008	18:50:07	23.112	93.788	3.9
3009	18:50:08	23.112	93.788	3.9
3010	18:50:09	23.112	93.788	11.8
3011	18:50:10	23.112	93.761	3.9
3012	18:50:11	23.112	93.788	3.9
3013	18:50:12	23.112	93.761	3.9
3014	18:50:13	23.112	93.761	3.9
3015	18:50:14	23.112	93.734	11.8
3016	18:50:15	23.112	93.734	3.9
3017	18:50:16	23.112	93.734	3.9
3018	18:50:17	23.112	93.734	11.8
3019	18:50:18	23.112	93.734	3.9
3020	18:50:19	23.088	93.728	3.9
3021	18:50:20	23.112	93.707	3.9
3022	18:50:21	23.112	93.707	3.9
3023	18:50:22	23.112	93.68	3.9
3024	18:50:23	23.088	93.674	3.9
3025	18:50:24	23.112	93.68	3.9
3026	18:50:25	23.088	93.647	3.9
3027	18:50:26	23.112	93.626	3.9
3028	18:50:27	23.112	93.599	3.9
3029	18:50:28	23.112	93.572	3.9
3030	18:50:29	23.112	93.572	3.9
3031	18:50:30	23.088	93.539	3.9
3032	18:50:31	23.088	93.512	3.9
3033	18:50:32	23.112	93.518	3.9
3034	18:50:33	23.112	93.491	11.8
3035	18:50:34	23.112	93.464	3.9
3036	18:50:35	23.112	93.464	3.9
3037	18:50:36	23.112	93.464	3.9
3038	18:50:37	23.112	93.437	3.9
3039	18:50:38	23.112	93.437	3.9
3040	18:50:39	23.112	93.411	3.9
3041	18:50:40	23.112	93.411	3.9
3042	18:50:41	23.112	93.411	3.9
3043	18:50:42	23.112	93.411	3.9
3044	18:50:43	23.112	93.411	3.9
3045	18:50:44	23.112	93.437	3.9
3046	18:50:45	23.112	93.464	3.9
3047	18:50:46	23.112	93.464	3.9
3048	18:50:47	23.112	93.464	3.9
3049	18:50:48	23.112	93.491	11.8
3050	18:50:49	23.112	93.518	3.9
3051	18:50:50	23.112	93.572	3.9
3052	18:50:51	23.136	93.605	3.9
3053	18:50:52	23.112	93.626	3.9
3054	18:50:53	23.112	93.68	3.9
3055	18:50:54	23.112	93.68	3.9
3056	18:50:55	23.112	93.707	3.9
3057	18:50:56	23.112	93.734	3.9
3058	18:50:57	23.112	93.734	3.9
3059	18:50:58	23.112	93.734	3.9
3060	18:50:59	23.112	93.734	3.9
3061	18:51:00	23.112	93.734	3.9
3062	18:51:01	23.112	93.761	3.9
3063	18:51:02	23.112	93.761	3.9
3064	18:51:03	23.112	93.734	3.9
3065	18:51:04	23.112	93.734	3.9
3066	18:51:05	23.112	93.734	11.8
3067	18:51:06	23.112	93.734	3.9
3068	18:51:07	23.112	93.734	3.9
3069	18:51:08	23.112	93.761	3.9
3070	18:51:09	23.112	93.788	11.8
3071	18:51:10	23.112	93.788	3.9
3072	18:51:11	23.112	93.788	3.9
3073	18:51:12	23.112	93.788	11.8
3074	18:51:13	23.112	93.788	3.9
3075	18:51:14	23.112	93.814	3.9
3076	18:51:15	23.112	93.788	3.9
3077	18:51:16	23.112	93.788	3.9
3078	18:51:17	23.112	93.788	3.9
[truncated: 4,507 more rows]

## Sheet: 20170428_MiaoLi
20034486_20170428_MiaoLi
#	Date Time, GMT+08:00	Temp, °C (LGR S/N: 20034486, SEN S/N: 20034486)	RH, % (LGR S/N: 20034486, SEN S/N: 20034486)	Intensity, Lux (LGR S/N: 20034486, SEN S/N: 20034486)
504	17:23:50	23.713	55.357	3654.1
505	17:24:00	23.665	59.562	3733
506	17:24:10	23.665	62.439	4127.1
507	17:24:20	23.593	62.762	4537.1
508	17:24:30	23.472	59.624	2857.9
509	17:24:40	23.4	57.64	3401.8
510	17:24:50	23.352	57.849	2566.2
511	17:25:00	23.328	59.448	3512.2
512	17:25:10	23.232	59.187	3811.8			time	Temp-av	temp-std	RH-av	Rh-std	Intensity, Lux-av	Int-std	date	interval
513	17:25:20	23.16	56.148	3346.7			before	25	0.73	84.02	3.49	58.62	30.47	4/20/2017	18:18-18:30
514	17:25:30	23.136	57.786	2842.1			flash	22.61	0.14	95.79	0.47	4.69	2.37	4/20/2017	19:00-19:30
515	17:25:40	23.064	57.867	1407.3			fly	24.19	0.08	88.19	0.34	82.8	0	4/20/2017	19:45-19:47
516	17:25:50	22.968	55.778	5404.3
517	17:26:00	22.848	52.543	7201.8
518	17:26:10	22.729	50.858	7075.7
519	17:26:20	22.681	49.999	5199.3
520	17:26:30	22.609	49.451	5372.8
521	17:26:40	22.585	53.259	4954.9
522	17:26:50	22.561	57.359	7217.6
523	17:27:00	22.489	59.256	6389.8
524	17:27:10	22.417	62.386	3796			Temp-av	temp-std	RH-av	Rh-std	Intensity, Lux-av	Int-std	date	interval
525	17:27:20	22.298	60.602	3362.4		BEN1	20.7541	0.771212	71.2927	4.55328	2012.31	544.287	4/28/2017	17:27-17:43
526	17:27:30	22.226	57.647	1344.2		BEN1
527	17:27:40	22.202	57.551	4024.7		BEN1
528	17:27:50	22.058	56.696	2030.1		BEN1
529	17:28:00	21.987	60.949	1044.6		BEN1
530	17:28:10	22.011	66.382	2660.8		BEN1
531	17:28:20	22.011	65.903	2645		BEN1
532	17:28:30	21.963	65.805	2652.9		BEN1
533	17:28:40	21.939	65.082	2747.5		BEN1
534	17:28:50	21.891	65.163	2771.1		BEN1
535	17:29:00	21.867	65.459	2408.5		BEN1
536	17:29:10	21.819	65.451	2242.9		BEN1
537	17:29:20	21.772	65.532	2802.7		BEN1
538	17:29:30	21.748	65.678	2794.8		BEN1
539	17:29:40	21.724	66.033	2771.1		BEN1
540	17:29:50	21.676	66.472	2755.4		BEN1
541	17:30:00	21.652	66.975	2763.3		BEN1
542	17:30:10	21.604	67.472	2763.3		BEN1
543	17:30:20	21.581	67.051	2771.1		BEN1
544	17:30:30	21.557	66.958	2779		BEN1
545	17:30:40	21.533	68.023	2779		BEN1
546	17:30:50	21.485	69.788	2763.3		BEN1
547	17:31:00	21.461	69.901	2747.5		BEN1
548	17:31:10	21.413	69.303	2755.4		BEN1
549	17:31:20	21.39	69.003	2755.4		BEN1
550	17:31:30	21.366	69.058	2731.7		BEN1
551	17:31:40	21.342	68.758	2692.3		BEN1
552	17:31:50	21.294	69.104	2629.2		BEN1
553	17:32:00	21.27	69.158	2605.6		BEN1
554	17:32:10	21.246	69.626	2566.2		BEN1
555	17:32:20	21.199	69.617	2511		BEN1
556	17:32:30	21.175	69.377	2495.2		BEN1
557	17:32:40	21.127	69.427	2384.8		BEN1
558	17:32:50	21.103	70.892	2321.8		BEN1
559	17:33:00	21.056	69.944	2227.2		BEN1
560	17:33:10	21.032	69.792	1998.5		BEN1
561	17:33:20	20.984	70.459	1880.3		BEN1
562	17:33:30	20.96	70.982	1919.7		BEN1
563	17:33:40	20.913	71.382	1880.3		BEN1
564	17:33:50	20.889	70.675	1683.2		BEN1
565	17:34:00	20.841	70.813	1683.2		BEN1
566	17:34:10	20.817	71.51	1722.6		BEN1
567	17:34:20	20.77	71.764	1762		BEN1
568	17:34:30	20.746	72.138	1572.8		BEN1
569	17:34:40	20.722	72.425	1714.7		BEN1
570	17:34:50	20.698	72.478	1706.8		BEN1
571	17:35:00	20.65	72.236	1722.6		BEN1
572	17:35:10	20.627	72.61	1730.5		BEN1
573	17:35:20	20.603	73.099	1706.8		BEN1
574	17:35:30	20.579	72.833	1699		BEN1
575	17:35:40	20.555	72.974	1683.2		BEN1
576	17:35:50	20.531	72.911	1596.5		BEN1
577	17:36:00	20.507	73.312	1501.9		BEN1
578	17:36:10	20.484	73.105	1667.4		BEN1
579	17:36:20	20.436	73.24	1699		BEN1
580	17:36:30	20.412	73.699	1706.8		BEN1
581	17:36:40	20.388	73.115	1722.6		BEN1
582	17:36:50	20.365	73.082	1730.5		BEN1
583	17:37:00	20.341	74.263	1754.1		BEN1
584	17:37:10	20.317	73.998	1580.7		BEN1
585	17:37:20	20.293	73.733	1817.2		BEN1
586	17:37:30	20.269	73.613	1635.9		BEN1
587	17:37:40	20.246	73.724	1675.3		BEN1
588	17:37:50	20.222	74.441	1683.2		BEN1
589	17:38:00	20.198	74.868	1691.1		BEN1
590	17:38:10	20.174	74.892	1659.5		BEN1
591	17:38:20	20.15	74.859	1675.3		BEN1
592	17:38:30	20.126	74.278	1706.8		BEN1
593	17:38:40	20.126	74.48	1738.4		BEN1
594	17:38:50	20.103	74.504	1809.3		BEN1
595	17:39:00	20.079	74.816	1691.1		BEN1
596	17:39:10	20.055	75.299	1691.1		BEN1
597	17:39:20	20.031	75.409	1691.1		BEN1
598	17:39:30	20.007	75.462	1730.5		BEN1
599	17:39:40	20.007	75.347	1699		BEN1
600	17:39:50	19.984	75.515	1683.2		BEN1
601	17:40:00	19.96	75.51	1596.5		BEN1
602	17:40:10	19.936	76.078	1604.3		BEN1
603	17:40:20	19.936	76.078	1564.9		BEN1
604	17:40:30	19.912	75.558	1588.6		BEN1
605	17:40:40	19.888	75.896	1517.6		BEN1
606	17:40:50	19.888	76.125	1501.9		BEN1
607	17:41:00	19.865	75.806	1675.3		BEN1
608	17:41:10	19.841	75.944	1651.6		BEN1
609	17:41:20	19.817	75.395	1643.8		BEN1
610	17:41:30	19.817	75.022	1620.1		BEN1
611	17:41:40	19.793	75.333	1596.5		BEN1
612	17:41:50	19.77	75.643	1588.6		BEN1
613	17:42:00	19.746	75.753	1572.8		BEN1
614	17:42:10	19.746	76.039	1549.2		BEN1
615	17:42:20	19.722	76.463	1533.4		BEN1
616	17:42:30	19.698	76.658	1525.5		BEN1
617	17:42:40	19.698	76.658	1415.1		BEN1
618	17:42:50	19.674	76.396	1501.9		BEN1
619	17:43:00	19.651	76.477	1517.6		BEN1
620	17:43:10	19.651	76.819	106.4		in bag
621	17:43:20	19.651	79.258	3.9
622	17:43:30	19.651	77.502	11.8
623	17:43:40	19.674	76.31	3.9
624	17:43:50	19.698	75.314	3.9
625	17:44:00	19.722	74.112	11.8
626	17:44:10	19.77	73.602	3.9
627	17:44:20	19.817	73.236	3.9
628	17:44:30	19.841	72.632	3.9
629	17:44:40	19.888	72.555	11.8
630	17:44:50	19.936	72.274	11.8
631	17:45:00	20.007	71.881	3.9
632	17:45:10	20.031	71.536	3.9
633	17:45:20	20.079	71.137	3.9
634	17:45:30	20.126	70.825	3.9
635	17:45:40	20.174	70.571	3.9
636	17:45:50	20.222	70.404	3.9
637	17:46:00	20.269	70.208	3.9
638	17:46:10	20.317	69.983	3.9
639	17:46:20	20.365	69.786	3.9
640	17:46:30	20.412	69.56	3.9
641	17:46:40	20.436	69.329	3.9
642	17:46:50	20.484	69.132	3.9
643	17:47:00	20.531	68.905	11.8
644	17:47:10	20.579	68.708	11.8
645	17:47:20	20.603	68.417	3.9
646	17:47:30	20.65	68.367	3.9
647	17:47:40	20.698	68.287	3.9
648	17:47:50	20.722	68.143	3.9
649	17:48:00	20.77	67.975	3.9
650	17:48:10	20.793	67.831	3.9
651	17:48:20	20.841	67.691	3.9
652	17:48:30	20.865	67.577	3.9
653	17:48:40	20.913	67.437	3.9
654	17:48:50	20.936	67.264	240.5			Temp-av	temp-std	RH-av	Rh-std	Intensity, Lux-av	Int-std	date	interval
655	17:49:00	20.984	72.708	5175.7		LI02	20.5978	0.405761	80.2524	3.59987	3645.51	771.252	4/28/2017	17:49-17:59
656	17:49:10	21.032	71.726	5120.5		LI02
657	17:49:20	21.079	72.785	5025.9		LI02
658	17:49:30	21.103	73.051	4939.2		LI02
659	17:49:40	21.127	73.346	4852.5		LI02
660	17:49:50	21.151	73.699	4773.6		LI02
661	17:50:00	21.175	75.092	4718.4		LI02
662	17:50:10	21.175	77.017	4671.1		LI02
663	17:50:20	21.175	76.788	4631.7		LI02
664	17:50:30	21.151	77.241	4592.3		LI02
665	17:50:40	21.151	76.697	4521.3		LI02
666	17:50:50	21.103	75.682	4466.1		LI02
667	17:51:00	21.079	75.907	4403.1		LI02
668	17:51:10	21.056	76.247	4379.4		LI02
669	17:51:20	21.032	76.501	4340		LI02
670	17:51:30	21.008	76.926	4292.7		LI02
671	17:51:40	20.984	77.978	4245.4		LI02
672	17:51:50	20.96	78.286	4182.3		LI02
673	17:52:00	20.96	78.257	4142.9		LI02
674	17:52:10	20.936	78.224	4103.5		LI02
675	17:52:20	20.913	78.731	4064.1		LI02
676	17:52:30	20.913	79.355	4040.4		LI02
677	17:52:40	20.865	79.005	4001		LI02
678	17:52:50	20.841	78.83	3961.6		LI02
679	17:53:00	20.817	79.137	3922.2		LI02
680	17:53:10	20.793	79.217	3882.8		LI02
681	17:53:20	20.77	79.297	3859.1		LI02
682	17:53:30	20.746	79.858	3827.6		LI02
683	17:53:40	20.698	79.932	3788.1		LI02
684	17:53:50	20.674	80.322	3748.7		LI02
685	17:54:00	20.65	80.486	3693.5		LI02
686	17:54:10	20.627	81.044	3646.2		LI02
687	17:54:20	20.603	81.461	3614.7		LI02
688	17:54:30	20.579	81.68	3575.3		LI02
689	17:54:40	20.555	82.067	3528		LI02
690	17:54:50	20.531	82.286	3488.6		LI02
691	17:55:00	20.507	82.867	3441.3		LI02
692	17:55:10	20.484	82.862	3401.8		LI02
693	17:55:20	20.46	82.745	3362.4		LI02
694	17:55:30	20.436	82.712	3307.2		LI02
695	17:55:40	20.436	83.102	3252.1		LI02
696	17:55:50	20.412	83.069	3220.5		LI02
697	17:56:00	20.388	83.676	3189		LI02
698	17:56:10	20.365	83.504	3149.6		LI02
699	17:56:20	20.341	83.304	3110.1		LI02
700	17:56:30	20.317	82.853	3062.8		LI02
701	17:56:40	20.269	82.312	3023.4		LI02
702	17:56:50	20.246	82.362	2984		LI02
703	17:57:00	20.222	82.413	2952.5		LI02
704	17:57:10	20.174	82.626	2913		LI02
705	17:57:20	20.15	83.233	2889.4		LI02
706	17:57:30	20.126	83.923	2857.9		LI02
707	17:57:40	20.103	84.167	2818.4		LI02
708	17:57:50	20.103	84.333	2779		LI02
709	17:58:00	20.103	84.028	2739.6		LI02
710	17:58:10	20.079	84.078	2700.2		LI02
711	17:58:20	20.079	84.106	2668.7		LI02
712	17:58:30	20.079	84.161	2621.4		LI02
713	17:58:40	20.079	84.825	2589.8		LI02
714	17:58:50	20.055	85.068	2558.3		LI02
715	17:59:00	20.031	84.372	2534.6		LI02
716	17:59:10	20.007	83.646	2503.1		LI02
717	17:59:20	19.984	83.474	2471.6		LI02
718	17:59:30	19.96	83.746	2440		LI02
719	17:59:40	19.865	81.971	3196.9		LI02
720	17:59:50	19.888	79.957	3.9		in bag
721	18:00:00	19.936	79.685	11.8
722	18:00:10	19.984	78.933	11.8
723	18:00:20	20.031	78.773	3.9
724	18:00:30	20.103	78.164	3.9
725	18:00:40	20.15	77.036	3.9
726	18:00:50	20.198	76.474	11.8
727	18:01:00	20.246	76.198	11.8
728	18:01:10	20.293	75.778	3.9
729	18:01:20	20.341	75.357	3.9
730	18:01:30	20.388	74.964	3.9
731	18:01:40	20.436	74.714	3.9
732	18:01:50	20.484	74.464	3.9
733	18:02:00	20.531	74.387	3.9
734	18:02:10	20.579	74.079	3.9
735	18:02:20	20.603	73.794	3.9
736	18:02:30	20.65	73.427	3.9
737	18:02:40	20.698	73.175	3.9
738	18:02:50	20.746	73.069	3.9
739	18:03:00	20.77	72.812	11.8
740	18:03:10	20.817	72.53	11.8
741	18:03:20	20.841	72.186	11.8
742	18:03:30	20.889	72.049	3.9
743	18:03:40	20.913	71.879	3.9
744	18:03:50	20.96	71.625	11.8
745	18:04:00	20.984	71.542	3.9
746	18:04:10	21.008	71.371	3.9
747	18:04:20	21.056	71.088	3.9
748	18:04:30	21.079	70.975	11.8
749	18:04:40	21.127	70.661	484.9			Temp-av	temp-std	RH-av	Rh-std	Intensity, Lux-av	Int-std	date	interval
750	18:04:50	21.127	67.683	1454.6		ROAD3	19.7807	0.907395	72.2945	2.60178	1022.47	224.511	4/28/2017	18:04-18:15
751	18:05:00	21.151	68.132	1415.1		ROAD3
752	18:05:10	21.175	68.816	1423		ROAD3
753	18:05:20	21.175	68.728	1399.4		ROAD3
754	18:05:30	21.151	68.782	1375.7		ROAD3
755	18:05:40	21.127	69.014	1359.9		ROAD3
756	18:05:50	21.079	68.444	1344.2		ROAD3
757	18:06:00	21.056	67.996	1328.4		ROAD3
758	18:06:10	21.008	68.432	1312.6		ROAD3
759	18:06:20	20.96	69.279	1296.9		ROAD3
760	18:06:30	20.913	69.799	1281.1		ROAD3
761	18:06:40	20.841	70.08	1265.3		ROAD3
762	18:06:50	20.793	70.218	1257.5		ROAD3
763	18:07:00	20.746	70.062	1233.8		ROAD3
764	18:07:10	20.674	70.196	1218		ROAD3
765	18:07:20	20.627	70.597	1210.2		ROAD3
766	18:07:30	20.555	70.818	1194.4		ROAD3
767	18:07:40	20.484	70.746	1178.6		ROAD3
768	18:07:50	20.436	70.62	1162.9		ROAD3
769	18:08:00	20.365	70.197	1155		ROAD3
770	18:08:10	20.293	70.008	1139.2		ROAD3
771	18:08:20	20.246	70.672	1131.3		ROAD3
772	18:08:30	20.198	70.926	1115.6		ROAD3
773	18:08:40	20.126	70.942	1099.8		ROAD3
774	18:08:50	20.079	71.137	1084		ROAD3
775	18:09:00	20.007	71.532	1068.2		ROAD3
776	18:09:10	19.96	71.348	1060.4		ROAD3
777	18:09:20	19.912	71.339	1044.6		ROAD3
778	18:09:30	19.841	71.209	1028.8		ROAD3
779	18:09:40	19.793	70.966	1013.1		ROAD3
780	18:09:50	19.746	71.656	1005.2		ROAD3
781	18:10:00	19.698	72.025	989.4		ROAD3
782	18:10:10	19.627	72.301	981.5		ROAD3
783	18:10:20	19.579	72.379	965.8		ROAD3
784	18:10:30	19.532	72.602	950		ROAD3
785	18:10:40	19.484	73.113	942.1		ROAD3
786	18:10:50	19.436	73.335	934.2		ROAD3
787	18:11:00	19.389	73.672	918.5		ROAD3
788	18:11:10	19.341	73.835	910.6		ROAD3
789	18:11:20	19.294	74.2	894.8		ROAD3
790	18:11:30	19.246	74.592	886.9		ROAD3
791	18:11:40	19.199	74.267	879		ROAD3
792	18:11:50	19.151	73.826	863.3		ROAD3
793	18:12:00	19.103	73.731	855.4		ROAD3
794	18:12:10	19.056	74.44	847.5		ROAD3
795	18:12:20	19.008	74.918	839.6		ROAD3
796	18:12:30	18.985	74.77	823.9		ROAD3
797	18:12:40	18.937	74.215	816		ROAD3
798	18:12:50	18.889	74.435	808.1		ROAD3
799	18:13:00	18.842	74.913	792.3		ROAD3
800	18:13:10	18.794	75.333	792.3		ROAD3
801	18:13:20	18.747	75.523	784.4		ROAD3
802	18:13:30	18.723	75.632	768.7		ROAD3
803	18:13:40	18.675	75.423	760.8		ROAD3
804	18:13:50	18.628	75.328	745		ROAD3
805	18:14:00	18.58	75.575	737.1		ROAD3
806	18:14:10	18.557	75.969	729.2		ROAD3
807	18:14:20	18.533	75.936	721.4		ROAD3
808	18:14:30	18.485	76.182	713.5		ROAD3
809	18:14:40	18.438	76.258	705.6		ROAD3
810	18:14:50	18.414	76.537	697.7		ROAD3
811	18:15:00	18.39	76.617	681.9		ROAD3
812	18:15:10	18.343	76.21	153.7		in bag
813	18:15:20	18.343	77.231	3.9
814	18:15:30	18.39	76.788	3.9
815	18:15:40	18.438	76.201	3.9
816	18:15:50	18.485	75.755	3.9
817	18:16:00	18.557	75.313	3.9
818	18:16:10	18.628	74.899	3.9
819	18:16:20	18.675	74.594	11.8
820	18:16:30	18.723	74.345	11.8
821	18:16:40	18.794	74.072	3.9
822	18:16:50	18.842	73.881	11.8
823	18:17:00	18.913	73.722	3.9
824	18:17:10	18.961	73.588	3.9
825	18:17:20	19.032	73.429	3.9
826	18:17:30	19.08	73.352	3.9
827	18:17:40	19.127	73.159	3.9
828	18:17:50	19.199	72.884	3.9
829	18:18:00	19.246	72.893	11.8
830	18:18:10	19.294	72.787	3.9
831	18:18:20	19.318	72.531	3.9
832	18:18:30	19.389	72.371	11.8
833	18:18:40	19.413	72.115	11.8
834	18:18:50	19.484	71.926	3.9
835	18:19:00	19.508	71.843	114.3
836	18:19:10	19.603	73.973	3.9
837	18:19:20	19.698	76.172	3.9
838	18:19:30	19.77	75.643	3.9
839	18:19:40	19.865	75.118	11.8
840	18:19:50	19.936	74.758	3.9
841	18:20:00	20.007	74.168	3.9
842	18:20:10	20.079	73.691	3.9
843	18:20:20	20.15	73.272	3.9
844	18:20:30	20.198	72.933	3.9
845	18:20:40	20.246	72.566	3.9
846	18:20:50	20.293	71.702	3.9
847	18:21:00	20.341	71.566	11.8
848	18:21:10	20.388	71.429	3.9
849	18:21:20	20.436	71.263	3.9
850	18:21:30	20.46	71.034	3.9
851	18:21:40	20.507	70.838	3.9
852	18:21:50	20.531	70.609	3.9
853	18:22:00	20.555	70.349	3.9
854	18:22:10	20.603	70.094	3.9
855	18:22:20	20.627	69.893	3.9
856	18:22:30	20.65	69.692	3.9
857	18:22:40	20.674	69.55	11.8
858	18:22:50	20.698	69.201	3.9
859	18:23:00	20.722	68.999	3.9
860	18:23:10	20.746	68.856	3.9
861	18:23:20	20.77	68.684	3.9
862	18:23:30	20.793	68.481	3.9
863	18:23:40	20.793	68.334	3.9
864	18:23:50	20.817	68.131	3.9
865	18:24:00	20.841	67.928	3.9
866	18:24:10	20.841	67.751	3.9
867	18:24:20	20.865	67.577	11.8
868	18:24:30	20.865	67.37	3.9
869	18:24:40	20.889	67.196	11.8
870	18:24:50	20.889	67.107	3.9
871	18:25:00	20.913	66.903	3.9
872	18:25:10	20.913	66.755	3.9
873	18:25:20	20.913	66.636	3.9
874	18:25:30	20.936	66.521	3.9
875	18:25:40	20.936	66.402	3.9
876	18:25:50	20.96	66.287	3.9
877	18:26:00	20.96	66.138	3.9
878	18:26:10	20.96	66.019	3.9
879	18:26:20	20.96	65.9	3.9
880	18:26:30	20.96	65.482	27.6			Temp-av	temp-std	RH-av	Rh-std	Intensity, Lux-av	Int-std	date	interval
881	18:26:40	20.96	68.009	177.4		BEN01-LI02	20.3275	0.461766	71.1457	1.85287	122.535	26.3011	4/28/2017	18:26-18:30
882	18:26:50	20.913	69.034	161.6		sampling site
883	18:27:00	20.913	69.034	161.6		sampling site
884	18:27:10	20.889	69.03	153.7		sampling site
885	18:27:20	20.817	69.252	145.8		sampling site
886	18:27:30	20.793	69.601	145.8		sampling site
887	18:27:40	20.722	69.794	138		sampling site
888	18:27:50	20.65	69.957	130.1		sampling site
889	18:28:00	20.579	70.178	130.1		sampling site
890	18:28:10	20.507	70.604	130.1		sampling site
891	18:28:20	20.436	70.62	122.2		sampling site
892	18:28:30	20.341	70.807	122.2		sampling site
893	18:28:40	20.269	70.998	114.3		sampling site
894	18:28:50	20.198	71.422	114.3		sampling site
895	18:29:00	20.103	71.753	106.4		sampling site
896	18:29:10	20.055	72.093	106.4		sampling site
897	18:29:20	19.984	72.457	106.4		sampling site
898	18:29:30	19.912	72.878	98.5		sampling site
899	18:29:40	19.841	73.038	98.5		sampling site
900	18:29:50	19.77	73.602	90.7		sampling site
901	18:30:00	19.698	73.732	90.7		sampling site
902	18:30:10	19.627	74.064	90.7		sampling site
903	18:30:20	19.555	74.395	82.8		sampling site
904	18:30:30	19.508	74.731	82.8		firefly appear
905	18:30:40	19.436	75.147	82.8		firefly appear
906	18:30:50	19.389	75.338	74.9		firefly appear
907	18:31:00	19.318	75.466	74.9		firefly appear
908	18:31:10	19.27	75.657	74.9		firefly appear
909	18:31:20	19.222	75.99	67		firefly appear
910	18:31:30	19.151	75.69	67		firefly appear
911	18:31:40	19.103	75.566	67		firefly appear
912	18:31:50	19.032	75.38	59.1		firefly appear
913	18:32:00	18.985	75.628	59.1		firefly appear
914	18:32:10	18.937	75.904	59.1		firefly appear
915	18:32:20	18.866	76.032	59.1		firefly appear
916	18:32:30	18.818	75.794	59.1		firefly appear
917	18:32:40	18.747	75.723	51.2		firefly appear
918	18:32:50	18.699	76.197	51.2		firefly appear
919	18:33:00	18.652	76.728	43.4		firefly appear
920	18:33:10	18.604	76.832	43.4		firefly appear
921	18:33:20	18.533	76.874	43.4		firefly appear
922	18:33:30	18.485	77.176	43.4		firefly appear
923	18:33:40	18.438	77.478	43.4		firefly appear
924	18:33:50	18.438	79.029	27.6		firefly appear
925	18:34:00	18.58	82.523	3.9		firefly appear
926	18:34:10	18.937	82.658	19.7		firefly appear
927	18:34:20	19.294	80.56	19.7		firefly appear
928	18:34:30	19.436	77.287	19.7		firefly appear
929	18:34:40	19.603	75.553	19.7		firefly appear
930	18:34:50	19.698	74.567	19.7		firefly appear
931	18:35:00	19.722	73.996	19.7		firefly appear
932	18:35:10	19.746	74.174	11.8		firefly appear
933	18:35:20	19.722	74.227	11.8		firefly appear
934	18:35:30	19.674	73.987	11.8		firefly appear
935	18:35:40	19.627	73.661	11.8		firefly appear
936	18:35:50	19.579	74.141	11.8		firefly appear
937	18:36:00	19.532	73.584	11.8		firefly appear
938	18:36:10	19.46	73.945	11.8		firefly appear
939	18:36:20	19.389	74.65	11.8		firefly appear
940	18:36:30	19.318	75.466	11.8		firefly appear
941	18:36:40	19.27	75.886	11.8		firefly appear
942	18:36:50	19.199	76.726	11.8		firefly appear
943	18:37:00	19.127	76.484	11.8		firefly appear
944	18:37:10	19.08	75.619	11.8		firefly appear
945	18:37:20	19.008	76.032	11.8		firefly appear
946	18:37:30	18.961	76.791	11.8		firefly appear
947	18:37:40	18.913	77.293	11.8		firefly appear
948	18:37:50	18.842	77.561	11.8		firefly appear
949	18:38:00	18.794	77.665	11.8		firefly appear
950	18:38:10	18.747	78.164	11.8		firefly appear
951	18:38:20	18.699	78.662	11.8		firefly appear
952	18:38:30	18.652	78.934	11.8		firefly appear
953	18:38:40	18.604	79.036	11.8		firefly appear
954	18:38:50	18.557	79.251	11.8		firefly appear
955	18:39:00	18.533	79.751	11.8		firefly appear
956	18:39:10	18.485	80.693	11.8		firefly appear
957	18:39:20	18.461	81.552	11.8		firefly appear
958	18:39:30	18.414	81.263	11.8		firefly appear
959	18:39:40	18.366	81.058	3.9		firefly appear
960	18:39:50	18.319	81.075	11.8		firefly appear
961	18:40:00	18.271	81.093	11.8		firefly appear
962	18:40:10	18.247	80.697	3.9		flying
963	18:40:20	18.2	80.938	3.9
964	18:40:30	18.152	81.596	3.9
965	18:40:40	18.129	81.924	11.8
966	18:40:50	18.105	82.057	3.9
967	18:41:00	18.057	82.213	3.9
968	18:41:10	18.033	82.374	3.9
969	18:41:20	18.01	82.563	3.9
970	18:41:30	17.986	82.502	3.9
971	18:41:40	17.962	82.524	3.9
972	18:41:50	17.938	82.187	3.9
973	18:42:00	17.915	82.375	11.8
974	18:42:10	17.891	82.37	3.9
975	18:42:20	17.867	82.393	3.9
976	18:42:30	17.867	82.42	3.9
977	18:42:40	17.843	82.636	3.9
978	18:42:50	17.819	82.769	3.9
979	18:43:00	17.819	82.742	3.9
980	18:43:10	17.796	82.598	3.9
981	18:43:20	17.772	82.979	3.9
982	18:43:30	17.748	83.443	3.9
983	18:43:40	17.748	83.856	3.9
984	18:43:50	17.724	84.015	11.8
985	18:44:00	17.724	84.399	3.9
986	18:44:10	17.701	84.558	3.9
987	18:44:20	17.677	84.58	11.8
988	18:44:30	17.677	84.663	11.8
989	18:44:40	17.677	85.046	3.9
990	18:44:50	17.653	85.013	3.9
991	18:45:00	17.653	85.15	3.9
992	18:45:10	17.629	85.117	3.9
993	18:45:20	17.629	85.144	3.9
994	18:45:30	17.605	85.139	3.9
995	18:45:40	17.605	85.221	3.9
996	18:45:50	17.582	85.297	3.9
997	18:46:00	17.582	85.434	3.9
998	18:46:10	17.558	85.537	3.9
999	18:46:20	17.534	85.477	3.9
1000	18:46:30	17.534	85.341	3.9
1001	18:46:40	17.51	85.226	3.9
1002	18:46:50	17.486	85.357	3.9
1003	18:47:00	17.486	85.439	11.8
1004	18:47:10	17.486	85.439	3.9
1005	18:47:20	17.463	85.434	3.9
1006	18:47:30	17.463	85.761	3.9
1007	18:47:40	17.439	85.919	3.9
1008	18:47:50	17.439	85.946	3.9
1009	18:48:00	17.439	86	3.9
1010	18:48:10	17.415	85.995	3.9
1011	18:48:20	17.415	86.212	3.9
1012	18:48:30	17.391	86.071	11.8
1013	18:48:40	17.391	86.234	3.9
1014	18:48:50	17.368	86.174	11.8
1015	18:49:00	17.368	86.038	11.8
1016	18:49:10	17.368	86.011	3.9
1017	18:49:20	17.344	86.223	11.8
1018	18:49:30	17.344	86.467	11.8
1019	18:49:40	17.344	86.657	3.9
1020	18:49:50	17.344	86.711	3.9
1021	18:50:00	17.32	86.733	3.9
1022	18:50:10	17.32	86.923	3.9
1023	18:50:20	17.32	86.977	3.9
1024	18:50:30	17.32	87.004	3.9
1025	18:50:40	17.32	87.193	3.9
1026	18:50:50	17.296	87.296	3.9
1027	18:51:00	17.296	86.971	3.9
1028	18:51:10	17.296	86.754	11.8
1029	18:51:20	17.296	86.754	3.9
1030	18:51:30	17.296	86.646	3.9
1031	18:51:40	17.272	86.097	3.9
1032	18:51:50	17.272	85.934	11.8
1033	18:52:00	17.249	85.711	3.9
1034	18:52:10	17.249	86.01	11.8
1035	18:52:20	17.249	85.575	11.8
1036	18:52:30	17.225	85.569	3.9
1037	18:52:40	17.225	85.923	3.9
1038	18:52:50	17.225	86.304	11.8
1039	18:53:00	17.225	86.629	11.8
1040	18:53:10	17.201	86.488	11.8
1041	18:53:20	17.201	86.325	3.9
1042	18:53:30	17.201	86.732	3.9
1043	18:53:40	17.201	86.651	11.8
1044	18:53:50	17.177	86.51	3.9
1045	18:54:00	17.177	86.293	3.9
1046	18:54:10	17.177	86.455	3.9
1047	18:54:20	17.153	86.45	3.9
1048	18:54:30	17.153	86.396	3.9
1049	18:54:40	17.153	86.504	3.9
1050	18:54:50	17.153	86.178	3.9
1051	18:55:00	17.13	86.064	3.9
1052	18:55:10	17.13	86.281	11.8
1053	18:55:20	17.13	86.254	3.9
1054	18:55:30	17.13	86.064	3.9
1055	18:55:40	17.106	86.222	3.9
1056	18:55:50	17.106	86.113	3.9
1057	18:56:00	17.106	86.357	3.9
1058	18:56:10	17.082	86.379	3.9
1059	18:56:20	17.082	86.297	3.9
1060	18:56:30	17.082	86.406	3.9
1061	18:56:40	17.058	86.427	11.8
1062	18:56:50	17.058	86.4	11.8
1063	18:57:00	17.058	85.83	3.9
1064	18:57:10	17.034	85.661	3.9
1065	18:57:20	17.034	85.743	3.9
1066	18:57:30	17.034	86.096	3.9
1067	18:57:40	17.011	86.145	3.9
1068	18:57:50	17.011	86.118	3.9
1069	18:58:00	17.011	86.443	11.8
1070	18:58:10	17.011	86.931	3.9
1071	18:58:20	17.011	87.255	3.9
1072	18:58:30	17.011	87.471	3.9
1073	18:58:40	17.011	87.309	3.9
1074	18:58:50	16.987	87.25	3.9
1075	18:59:00	16.987	87.466	3.9
1076	18:59:10	16.987	87.709	3.9
1077	18:59:20	16.987	87.87	3.9
1078	18:59:30	16.963	87.757	3.9
1079	18:59:40	16.963	87.595	3.9
1080	18:59:50	16.963	87.595	3.9			Temp-av	temp-std	RH-av	Rh-std	Intensity, Lux-av	Int-std	date	interval
1081	19:00:00	16.963	87.73	3.9			17.8906	0.870198	86.6434	4.04439	5.93871	3.46613	4/28/2017	19:00-19:30
1082	19:00:10	16.939	87.724	3.9
1083	19:00:20	16.939	87.751	3.9
1084	19:00:30	16.939	87.697	3.9
1085	19:00:40	16.939	88.02	11.8
1086	19:00:50	16.939	87.859	3.9
1087	19:01:00	16.915	87.665	3.9
1088	19:01:10	16.915	87.53	3.9
1089	19:01:20	16.892	87.848	3.9
1090	19:01:30	16.892	87.794	3.9
1091	19:01:40	16.868	87.842	3.9
1092	19:01:50	16.868	88.084	3.9
1093	19:02:00	16.868	88.165	3.9
1094	19:02:10	16.844	88.213	3.9
1095	19:02:20	16.844	88.32	3.9
1096	19:02:30	16.844	88.374	3.9
1097	19:02:40	16.844	88.186	3.9
1098	19:02:50	16.844	88.159	3.9
1099	19:03:00	16.844	88.052	3.9
1100	19:03:10	16.82	88.153	3.9
1101	19:03:20	16.82	88.261	11.8
1102	19:03:30	16.82	88.476	11.8
1103	19:03:40	16.82	88.959	3.9
1104	19:03:50	16.82	89.387	3.9
1105	19:04:00	16.82	89.494	3.9
1106	19:04:10	16.82	89.334	3.9
1107	19:04:20	16.796	89.194	3.9
1108	19:04:30	16.796	89.167	3.9
1109	19:04:40	16.796	89.167	3.9
1110	19:04:50	16.796	89.114	11.8
1111	19:05:00	16.796	89.328	3.9
1112	19:05:10	16.796	89.809	3.9
1113	19:05:20	16.796	89.488	3.9
1114	19:05:30	16.773	88.894	3.9
1115	19:05:40	16.773	88.786	3.9
1116	19:05:50	16.749	88.647	3.9
1117	19:06:00	16.749	88.673	3.9
1118	19:06:10	16.749	88.834	11.8
1119	19:06:20	16.749	88.995	3.9
1120	19:06:30	16.749	89.209	3.9
1121	19:06:40	16.749	89.156	11.8
1122	19:06:50	16.749	88.888	3.9
1123	19:07:00	16.725	88.989	11.8
1124	19:07:10	16.725	88.829	3.9
1125	19:07:20	16.725	88.614	11.8
1126	19:07:30	16.725	88.721	11.8
1127	19:07:40	16.701	88.232	11.8
1128	19:07:50	16.701	88.206	3.9
1129	19:08:00	16.701	88.662	3.9
1130	19:08:10	16.701	88.876	11.8
1131	19:08:20	16.701	88.876	11.8
1132	19:08:30	16.677	88.924	3.9
1133	19:08:40	16.677	89.085	3.9
1134	19:08:50	16.677	89.352	3.9
1135	19:09:00	16.677	89.566	11.8
1136	19:09:10	16.677	89.673	3.9
1137	19:09:20	16.82	94.175	3.9
1138	19:09:30	16.915	96.827	3.9
1139	19:09:40	17.011	97.446	3.9
1140	19:09:50	17.082	97.569	11.8
1141	19:10:00	17.13	97.504	3.9
1142	19:10:10	17.177	97.285	11.8
1143	19:10:20	17.225	96.495	11.8
1144	19:10:30	17.249	94.914	3.9
1145	19:10:40	17.296	93.695	3.9
1146	19:10:50	17.344	92.917	3.9
1147	19:11:00	17.368	92.395	3.9
1148	19:11:10	17.415	92.036	3.9
1149	19:11:20	17.439	91.671	11.8
1150	19:11:30	17.486	91.47	3.9
1151	19:11:40	17.51	91.37	11.8
1152	19:11:50	17.534	91.163	3.9
1153	19:12:00	17.558	91.009	11.8
1154	19:12:10	17.605	90.861	3.9
1155	19:12:20	17.629	90.6	3.9
1156	19:12:30	17.653	90.446	3.9
1157	19:12:40	17.677	90.291	3.9
1158	19:12:50	17.701	90.137	3.9
1159	19:13:00	17.724	89.982	3.9
1160	19:13:10	17.748	89.827	3.9
1161	19:13:20	17.772	89.672	3.9
1162	19:13:30	17.796	89.517	3.9
1163	19:13:40	17.819	89.389	3.9
1164	19:13:50	17.843	89.26	3.9
1165	19:14:00	17.867	89.104	3.9
1166	19:14:10	17.891	88.949	3.9
1167	19:14:20	17.891	88.787	3.9
1168	19:14:30	17.915	88.658	11.8
1169	19:14:40	17.938	88.529	3.9
1170	19:14:50	17.962	88.427	3.9
1171	19:15:00	17.986	88.298	3.9
1172	19:15:10	18.01	88.168	3.9
1173	19:15:20	18.01	88.06	3.9
1174	19:15:30	18.033	87.958	3.9
1175	19:15:40	18.057	87.855	3.9
1176	19:15:50	18.081	87.753	3.9
1177	19:16:00	18.105	87.65	3.9
1178	19:16:10	18.129	87.547	3.9
1179	19:16:20	18.129	87.439	3.9
1180	19:16:30	18.152	87.336	3.9
1181	19:16:40	18.176	87.287	3.9
1182	19:16:50	18.2	87.184	3.9
1183	19:17:00	18.2	87.076	3.9
1184	19:17:10	18.224	87	3.9
1185	19:17:20	18.247	86.924	3.9
1186	19:17:30	18.271	86.82	3.9
1187	19:17:40	18.271	86.712	3.9
1188	19:17:50	18.295	86.608	3.9
1189	19:18:00	18.319	86.532	11.8
1190	19:18:10	18.343	86.429	3.9
1191	19:18:20	18.343	86.292	3.9
1192	19:18:30	18.366	86.243	11.8
1193	19:18:40	18.366	86.134	3.9
1194	19:18:50	18.414	86.063	11.8
1195	19:19:00	18.414	85.981	11.8
1196	19:19:10	18.438	85.932	3.9
1197	19:19:20	18.438	85.823	3.9
1198	19:19:30	18.461	85.774	3.9
1199	19:19:40	18.485	85.697	3.9
1200	19:19:50	18.485	85.615	11.8
1201	19:20:00	18.509	85.538	11.8
1202	19:20:10	18.509	85.456	3.9
1203	19:20:20	18.533	85.407	11.8
1204	19:20:30	18.557	85.303	11.8
1205	19:20:40	18.58	85.199	3.9
1206	19:20:50	18.58	85.089	3.9
1207	19:21:00	18.604	85.012	3.9
1208	19:21:10	18.604	84.902	11.8
1209	19:21:20	18.628	84.798	3.9
1210	19:21:30	18.628	84.66	3.9
1211	19:21:40	18.652	84.556	3.9
1212	19:21:50	18.675	84.451	3.9
1213	19:22:00	18.675	84.313	3.9
1214	19:22:10	18.675	84.176	3.9
1215	19:22:20	18.699	84.071	11.8
1216	19:22:30	18.723	83.966	3.9
1217	19:22:40	18.723	83.855	3.9
1218	19:22:50	18.723	83.717	11.8
1219	19:23:00	18.747	83.612	3.9
1220	19:23:10	18.747	83.529	3.9
1221	19:23:20	18.771	83.424	11.8
1222	19:23:30	18.771	83.286	3.9
1223	19:23:40	18.771	83.147	3.9
1224	19:23:50	18.794	82.959	11.8
1225	19:24:00	18.794	82.82	3.9
1226	19:24:10	18.818	82.742	3.9
1227	19:24:20	18.818	82.659	11.8
1228	19:24:30	18.842	82.581	11.8
1229	19:24:40	18.842	82.498	3.9
1230	19:24:50	18.842	82.415	11.8
1231	19:25:00	18.866	82.337	3.9
1232	19:25:10	18.866	82.225	11.8
1233	19:25:20	18.889	82.147	3.9
1234	19:25:30	18.889	82.036	11.8
1235	19:25:40	18.889	81.952	3.9
1236	19:25:50	18.913	81.902	11.8
1237	19:26:00	18.913	81.818	11.8
1238	19:26:10	18.913	81.707	11.8
1239	19:26:20	18.913	81.568	3.9
1240	19:26:30	18.913	81.456	3.9
1241	19:26:40	18.937	81.322	3.9
1242	19:26:50	18.937	81.21	3.9
1243	19:27:00	18.937	81.126	3.9
1244	19:27:10	18.937	81.014	3.9
1245	19:27:20	18.961	80.908	11.8
1246	19:27:30	18.961	80.796	11.8
1247	19:27:40	18.961	80.712	11.8
1248	19:27:50	18.961	80.628	3.9
1249	19:28:00	18.961	80.516	3.9
1250	19:28:10	18.961	80.292	3.9
1251	19:28:20	18.961	80.236	3.9
1252	19:28:30	18.985	80.213	3.9
1253	19:28:40	18.985	80.129	11.8
1254	19:28:50	18.985	80.073	3.9
1255	19:29:00	18.985	80.017	3.9
1256	19:29:10	18.985	79.932	3.9
1257	19:29:20	19.008	79.853	3.9
1258	19:29:30	19.008	79.769	3.9
1259	19:29:40	19.008	79.741	11.8
1260	19:29:50	19.008	79.656	3.9
1261	19:30:00	19.008	79.6	11.8
1262	19:30:10	19.008	79.544	3.9
1263	19:30:20	19.032	79.493	3.9
1264	19:30:30	19.032	79.408	3.9
1265	19:30:40	19.032	79.324	11.8		homing
1266	19:30:50	19.032	79.268	3.9
1267	19:31:00	19.032	79.211	3.9
1268	19:31:10	19.056	79.076	11.8
1269	19:31:20	19.032	78.958	3.9
1270	19:31:30	19.056	78.85	3.9
1271	19:31:40	19.056	78.822	11.8
1272	19:31:50	19.056	78.737	3.9
1273	19:32:00	19.056	78.596	3.9
1274	19:32:10	19.056	78.54	3.9
1275	19:32:20	19.056	78.483	3.9
1276	19:32:30	19.056	78.427	11.8
1277	19:32:40	19.056	78.37	11.8
1278	19:32:50	19.056	78.314	3.9
1279	19:33:00	19.056	78.285	3.9
1280	19:33:10	19.08	78.262	3.9
1281	19:33:20	19.08	78.234	11.8
1282	19:33:30	19.08	78.234	3.9
1283	19:33:40	19.08	78.234	11.8
1284	19:33:50	19.08	78.234	11.8
1285	19:34:00	19.08	78.234	11.8
1286	19:34:10	19.103	78.239	3.9
1287	19:34:20	19.103	78.239	3.9
1288	19:34:30	19.103	78.239	3.9
1289	19:34:40	19.103	78.267	3.9
1290	19:34:50	19.103	78.267	3.9
1291	19:35:00	19.127	78.272	3.9
1292	19:35:10	19.127	78.3	11.8
1293	19:35:20	19.151	78.305	3.9
1294	19:35:30	19.151	78.333	3.9
1295	19:35:40	19.151	78.362	3.9
1296	19:35:50	19.175	78.367	3.9
1297	19:36:00	19.175	78.423	11.8
1298	19:36:10	19.199	78.485	3.9
1299	19:36:20	19.199	78.485	11.8
1300	19:36:30	19.222	78.49	3.9
1301	19:36:40	19.222	78.518	3.9
1302	19:36:50	19.246	78.523	3.9
1303	19:37:00	19.246	78.495	3.9
1304	19:37:10	19.27	78.5	11.8
1305	19:37:20	19.294	78.505	3.9
1306	19:37:30	19.294	78.448	3.9
1307	19:37:40	19.318	78.397	11.8
1308	19:37:50	19.318	78.283	3.9
1309	19:38:00	19.341	78.175	3.9
1310	19:38:10	19.365	78.152	3.9
1311	19:38:20	19.365	78.01	3.9
1312	19:38:30	19.389	77.902	3.9
1313	19:38:40	19.389	77.788	3.9
1314	19:38:50	19.413	77.623	11.8
1315	19:39:00	19.413	77.51	3.9
1316	19:39:10	19.436	77.344	3.9
1317	19:39:20	19.436	76.889	3.9
1318	19:39:30	19.46	76.837	3.9
1319	19:39:40	19.46	76.723	3.9
1320	19:39:50	19.46	76.638	3.9
1321	19:40:00	19.484	76.585	3.9
1322	19:40:10	19.484	76.528	3.9
1323	19:40:20	19.484	76.443	3.9
1324	19:40:30	19.508	76.362	11.8
1325	19:40:40	19.508	76.248	3.9
1326	19:40:50	19.508	76.191	3.9
1327	19:41:00	19.508	76.105	3.9
1328	19:41:10	19.532	74.391	3.9
1329	19:41:20	19.532	74.391	3.9
1330	19:41:30	19.532	74.592	3.9
1331	19:41:40	19.532	74.678	3.9
1332	19:41:50	19.532	74.707	3.9
1333	19:42:00	19.532	74.764	3.9
1334	19:42:10	19.532	74.764	11.8
1335	19:42:20	19.508	74.759	3.9
1336	19:42:30	19.508	74.759	11.8
1337	19:42:40	19.508	74.817	3.9
1338	19:42:50	19.508	74.817	11.8
1339	19:43:00	19.508	74.845	3.9
1340	19:43:10	19.508	74.874	3.9
1341	19:43:20	19.508	74.903	3.9
1342	19:43:30	19.508	74.932	3.9
1343	19:43:40	19.508	74.96	3.9
1344	19:43:50	19.508	74.989	3.9
1345	19:44:00	19.508	75.018	11.8
1346	19:44:10	19.508	75.075	11.8
1347	19:44:20	19.508	75.075	11.8
1348	19:44:30	19.508	75.132	11.8
1349	19:44:40	19.508	75.161	3.9
1350	19:44:50	19.508	75.19	11.8
1351	19:45:00	19.508	75.218	11.8
1352	19:45:10	19.508	75.247	3.9
1353	19:45:20	19.508	75.247	3.9
1354	19:45:30	19.508	75.276	11.8
1355	19:45:40	19.508	75.304	11.8
1356	19:45:50	19.508	75.333	3.9
1357	19:46:00	19.532	75.366	3.9
1358	19:46:10	19.532	75.366	3.9
1359	19:46:20	19.532	75.395	3.9
1360	19:46:30	19.532	75.424	3.9
1361	19:46:40	19.532	75.424	3.9
1362	19:46:50	19.555	75.428	11.8
1363	19:47:00	19.555	75.457	3.9
1364	19:47:10	19.555	75.457	3.9
1365	19:47:20	19.555	75.486	3.9
1366	19:47:30	19.555	75.486	11.8
1367	19:47:40	19.579	75.491	11.8
1368	19:47:50	19.579	75.491	3.9
1369	19:48:00	19.579	75.491	3.9
1370	19:48:10	19.579	75.491	3.9
1371	19:48:20	19.603	75.524	3.9
1372	19:48:30	19.603	75.524	3.9
1373	19:48:40	19.603	75.524	3.9
1374	19:48:50	19.627	75.529	3.9
1375	19:49:00	19.627	75.5	3.9
1376	19:49:10	19.627	75.5	11.8
1377	19:49:20	19.627	75.5	3.9
1378	19:49:30	19.651	75.505	11.8
1379	19:49:40	19.651	75.505	11.8
1380	19:49:50	19.651	75.476	3.9
1381	19:50:00	19.674	75.481	3.9
1382	19:50:10	19.674	75.481	3.9
1383	19:50:20	19.674	75.452	11.8
1384	19:50:30	19.674	75.452	3.9
1385	19:50:40	19.698	75.429	3.9
1386	19:50:50	19.698	75.429	11.8
1387	19:51:00	19.698	75.4	3.9
1388	19:51:10	19.722	75.347	3.9
1389	19:51:20	19.722	75.319	3.9
1390	19:51:30	19.722	75.29	3.9
1391	19:51:40	19.746	74.836	11.8
1392	19:51:50	19.746	74.634	11.8
1393	19:52:00	19.77	74.725	3.9
1394	19:52:10	19.77	74.668	3.9
1395	19:52:20	19.793	74.644	3.9
1396	19:52:30	19.793	74.673	3.9
1397	19:52:40	19.817	74.62	3.9
1398	19:52:50	19.817	74.476	11.8
1399	19:53:00	19.817	74.476	3.9
1400	19:53:10	19.841	74.452	3.9
1401	19:53:20	19.865	74.399	3.9
1402	19:53:30	19.865	74.313	3.9
1403	19:53:40	19.865	74.284	3.9
1404	19:53:50	19.888	74.289	3.9
1405	19:54:00	19.888	74.289	3.9
1406	19:54:10	19.912	74.293	3.9
1407	19:54:20	19.912	74.264	3.9
1408	19:54:30	19.936	74.269	3.9
1409	19:54:40	19.936	74.24	3.9
1410	19:54:50	19.96	74.245	3.9
1411	19:55:00	19.96	74.216	3.9
1412	19:55:10	19.984	74.192	3.9
1413	19:55:20	19.984	74.221	3.9
1414	19:55:30	20.007	74.197	3.9
1415	19:55:40	20.007	74.168	3.9
1416	19:55:50	20.031	74.173	3.9
1417	19:56:00	20.031	74.144	3.9
1418	19:56:10	20.055	74.12	3.9
1419	19:56:20	20.055	74.12	11.8
1420	19:56:30	20.055	74.091	3.9
1421	19:56:40	20.079	74.038	3.9
1422	19:56:50	20.103	74.014	3.9
1423	19:57:00	20.103	73.985	3.9
1424	19:57:10	20.103	73.956	3.9
1425	19:57:20	20.126	73.903	3.9
1426	19:57:30	20.126	73.903	3.9
1427	19:57:40	20.15	73.879	11.8
1428	19:57:50	20.15	73.85	3.9
1429	19:58:00	20.174	73.826	3.9
1430	19:58:10	20.174	73.768	3.9
1431	19:58:20	20.174	73.739	3.9
1432	19:58:30	20.198	73.686	3.9
1433	19:58:40	20.198	73.628	3.9
1434	19:58:50	20.222	73.575	3.9
1435	19:59:00	20.222	73.546	3.9
1436	19:59:10	20.222	73.488	3.9
1437	19:59:20	20.246	73.435	3.9
1438	19:59:30	20.246	73.348	3.9
1439	19:59:40	20.246	73.29	3.9
1440	19:59:50	20.269	73.237	3.9
1441	20:00:00	20.269	73.179	3.9
1442	20:00:10	20.269	73.092	3.9
1443	20:00:20	20.269	73.005	3.9
1444	20:00:30	20.269	72.918	3.9
1445	20:00:40	20.293	72.865	3.9
1446	20:00:50	20.293	72.778	11.8
1447	20:01:00	20.293	72.691	3.9
1448	20:01:10	20.293	72.633	3.9
1449	20:01:20	20.293	72.575	3.9
1450	20:01:30	20.317	72.492	3.9
1451	20:01:40	20.317	72.405	3.9
1452	20:01:50	20.317	72.347	3.9
1453	20:02:00	20.317	72.26	3.9
1454	20:02:10	20.317	72.173	11.8
1455	20:02:20	20.317	72.085	3.9
1456	20:02:30	20.317	71.998	3.9
1457	20:02:40	20.317	71.94	3.9
1458	20:02:50	20.317	71.882	3.9
1459	20:03:00	20.317	71.823	3.9
1460	20:03:10	20.341	71.741	3.9
1461	20:03:20	20.317	71.619	3.9
1462	20:03:30	20.341	71.566	3.9
1463	20:03:40	20.317	71.503	3.9
1464	20:03:50	20.341	71.42	11.8
1465	20:04:00	20.341	71.362	11.8
1466	20:04:10	20.341	71.303	11.8
1467	20:04:20	20.341	71.216	3.9
1468	20:04:30	20.341	71.128	11.8
1469	20:04:40	20.341	71.041	3.9
1470	20:04:50	20.341	70.982	11.8
1471	20:05:00	20.317	70.919	3.9		trafficking
1472	20:05:10	20.341	70.865	3.9
1473	20:05:20	20.341	70.807	3.9
1474	20:05:30	20.341	70.719	11.8
1475	20:05:40	20.317	70.656	3.9
1476	20:05:50	20.317	70.568	3.9
1477	20:06:00	20.317	70.51	3.9
1478	20:06:10	20.317	70.422	11.8
1479	20:06:20	20.317	70.393	3.9
1480	20:06:30	20.317	70.305	3.9
1481	20:06:40	20.317	70.276	3.9
1482	20:06:50	20.317	70.217	3.9
1483	20:07:00	20.317	70.159	11.8
1484	20:07:10	20.317	70.129	3.9
1485	20:07:20	20.317	70.041	3.9
1486	20:07:30	20.317	69.983	3.9
1487	20:07:40	20.317	69.953	3.9
1488	20:07:50	20.317	69.895	3.9
1489	20:08:00	20.293	69.861	3.9
1490	20:08:10	20.293	69.802	3.9
1491	20:08:20	20.293	69.744	11.8
1492	20:08:30	20.293	69.685	3.9
1493	20:08:40	20.293	69.626	11.8
1494	20:08:50	20.293	69.568	11.8
1495	20:09:00	20.293	69.509	3.9
1496	20:09:10	20.293	69.479	3.9
1497	20:09:20	20.293	69.421	3.9
1498	20:09:30	20.293	69.362	11.8
1499	20:09:40	20.293	69.303	3.9
1500	20:09:50	20.269	69.24	11.8
1501	20:10:00	20.269	69.211	3.9
1502	20:10:10	20.269	69.152	11.8
1503	20:10:20	20.269	69.093	11.8
1504	20:10:30	20.269	69.064	3.9
1505	20:10:40	20.269	69.005	11.8
1506	20:10:50	20.246	68.971	3.9
1507	20:11:00	20.246	68.912	3.9
1508	20:11:10	20.246	68.883	3.9
1509	20:11:20	20.246	68.824	3.9
1510	20:11:30	20.246	68.794	3.9
1511	20:11:40	20.246	68.765	3.9
1512	20:11:50	20.222	68.702	3.9
1513	20:12:00	20.222	68.672	3.9
1514	20:12:10	20.222	68.643	3.9
1515	20:12:20	20.222	68.584	3.9
1516	20:12:30	20.222	68.554	3.9
1517	20:12:40	20.222	68.495	3.9
1518	20:12:50	20.222	68.466	3.9
1519	20:13:00	20.198	68.432	3.9
1520	20:13:10	20.198	68.373	3.9
1521	20:13:20	20.198	68.344	3.9
1522	20:13:30	20.198	68.314	3.9
1523	20:13:40	20.198	68.285	3.9
1524	20:13:50	20.198	68.226	3.9
1525	20:14:00	20.198	68.196	3.9
1526	20:14:10	20.174	68.163	3.9
1527	20:14:20	20.174	68.133	3.9
1528	20:14:30	20.174	68.133	3.9
1529	20:14:40	20.174	68.104	3.9
1530	20:14:50	20.174	68.074	3.9
1531	20:15:00	20.15	67.981	11.8
1532	20:15:10	20.15	67.952	3.9
1533	20:15:20	20.15	67.922	3.9
1534	20:15:30	20.15	67.863	3.9
1535	20:15:40	20.15	67.834	3.9
1536	20:15:50	20.15	67.804	3.9
1537	20:16:00	20.126	67.8	3.9
1538	20:16:10	20.126	67.77	11.8
1539	20:16:20	20.126	67.711	3.9
1540	20:16:30	20.126	67.711	3.9
1541	20:16:40	20.126	67.652	3.9
1542	20:16:50	20.126	67.622	3.9
1543	20:17:00	20.103	67.589	3.9
1544	20:17:10	20.103	67.559	3.9
1545	20:17:20	20.103	67.5	3.9
1546	20:17:30	20.103	67.5	3.9
1547	20:17:40	20.103	67.5	3.9
1548	20:17:50	20.103	67.5	3.9
1549	20:18:00	20.079	67.466	3.9
1550	20:18:10	20.079	67.437	3.9
1551	20:18:20	20.079	67.407	3.9
1552	20:18:30	20.079	67.407	3.9
1553	20:18:40	20.079	67.377	3.9
1554	20:18:50	20.079	67.377	3.9
1555	20:19:00	20.079	67.377	3.9
1556	20:19:10	20.055	67.344	3.9
1557	20:19:20	20.055	67.344	3.9
1558	20:19:30	20.055	67.344	3.9
1559	20:19:40	20.055	67.314	3.9
1560	20:19:50	20.055	67.284	3.9
1561	20:20:00	20.055	67.255	3.9
1562	20:20:10	20.055	67.225	3.9
1563	20:20:20	20.031	67.221	11.8
1564	20:20:30	20.031	67.191	3.9
1565	20:20:40	20.031	67.162	3.9
1566	20:20:50	20.031	67.132	3.9
1567	20:21:00	20.031	67.132	3.9
1568	20:21:10	20.031	67.132	3.9
1569	20:21:20	20.007	67.098	3.9
1570	20:21:30	20.007	67.098	3.9
1571	20:21:40	20.007	67.069	11.8
1572	20:21:50	20.007	67.039	3.9
1573	20:22:00	20.007	67.039	3.9
1574	20:22:10	20.007	67.01	3.9
1575	20:22:20	20.007	66.98	3.9
1576	20:22:30	20.007	66.95	11.8
1577	20:22:40	19.984	66.916	3.9
1578	20:22:50	19.984	66.887	3.9
1579	20:23:00	19.984	66.857	3.9
1580	20:23:10	19.984	66.828	3.9
1581	20:23:20	19.984	66.828	3.9
1582	20:23:30	19.984	66.768	3.9
1583	20:23:40	19.984	66.768	3.9
1584	20:23:50	19.96	66.735	3.9
1585	20:24:00	19.96	66.735	3.9
1586	20:24:10	19.96	66.705	3.9
1587	20:24:20	19.96	66.675	3.9
1588	20:24:30	19.96	66.646	3.9
1589	20:24:40	19.96	66.646	3.9
1590	20:24:50	19.936	66.612	3.9
1591	20:25:00	19.936	66.582	3.9
1592	20:25:10	19.936	66.582	3.9
1593	20:25:20	19.936	66.552	11.8
1594	20:25:30	19.936	66.552	3.9
1595	20:25:40	19.936	66.552	3.9
1596	20:25:50	19.936	66.523	11.8
1597	20:26:00	19.936	66.523	3.9
1598	20:26:10	19.912	66.459	3.9
1599	20:26:20	19.912	66.4	3.9
1600	20:26:30	19.912	66.37	3.9
1601	20:26:40	19.912	66.341	11.8
1602	20:26:50	19.912	66.311	3.9
1603	20:27:00	19.888	66.247	3.9
1604	20:27:10	19.888	66.218	3.9
1605	20:27:20	19.888	66.188	11.8
1606	20:27:30	19.888	66.158	3.9
1607	20:27:40	19.888	66.129	3.9
1608	20:27:50	19.888	66.129	3.9
1609	20:28:00	19.888	66.099	3.9
1610	20:28:10	19.865	66.065	3.9
1611	20:28:20	19.865	66.065	3.9
1612	20:28:30	19.865	66.065	3.9
1613	20:28:40	19.865	66.035	3.9
1614	20:28:50	19.865	66.006	3.9
1615	20:29:00	19.865	65.976	3.9
1616	20:29:10	19.841	65.942	3.9
1617	20:29:20	19.841	65.942	3.9
1618	20:29:30	19.841	65.912	3.9
1619	20:29:40	19.841	65.912	3.9
1620	20:29:50	19.841	65.883	3.9
1621	20:30:00	19.841	65.883	3.9
1622	20:30:10	19.841	65.883	3.9
1623	20:30:20	19.841	65.883	3.9
1624	20:30:30	19.841	65.853	3.9
1625	20:30:40	19.817	65.879	3.9
1626	20:30:50	19.817	65.849	3.9
1627	20:31:00	19.817	65.849	3.9
1628	20:31:10	19.817	65.819	3.9
1629	20:31:20	19.817	65.819	3.9
1630	20:31:30	19.817	65.819	3.9
1631	20:31:40	19.817	65.789	3.9
1632	20:31:50	19.793	65.756	3.9
1633	20:32:00	19.793	65.726	3.9
1634	20:32:10	19.793	65.726	3.9
1635	20:32:20	19.793	65.696	3.9
1636	20:32:30	19.793	65.666	11.8
1637	20:32:40	19.793	65.637	3.9
1638	20:32:50	19.793	65.637	3.9
1639	20:33:00	19.77	65.632	11.8
1640	20:33:10	19.77	65.632	3.9
1641	20:33:20	19.77	65.603	3.9
1642	20:33:30	19.77	65.603	3.9
1643	20:33:40	19.77	65.573	11.8
1644	20:33:50	19.77	65.573	3.9
1645	20:34:00	19.77	65.543	3.9
1646	20:34:10	19.746	65.539	11.8
1647	20:34:20	19.746	65.539	3.9
1648	20:34:30	19.746	65.539	3.9
1649	20:34:40	19.746	65.539	3.9
1650	20:34:50	19.746	65.569	3.9
1651	20:35:00	19.746	65.539	11.8
1652	20:35:10	19.746	65.539	3.9
1653	20:35:20	19.746	65.569	3.9
1654	20:35:30	19.746	65.539	3.9
1655	20:35:40	19.746	65.539	11.8
1656	20:35:50	19.746	65.539	3.9
1657	20:36:00	19.722	65.535	3.9
1658	20:36:10	19.722	65.505	3.9
1659	20:36:20	19.722	65.476	3.9
1660	20:36:30	19.722	65.505	3.9
1661	20:36:40	19.722	65.505	3.9
1662	20:36:50	19.722	65.446	11.8
1663	20:37:00	19.722	65.476	11.8
1664	20:37:10	19.722	65.446	3.9
1665	20:37:20	19.722	65.416	3.9
1666	20:37:30	19.722	65.416	3.9
1667	20:37:40	19.722	65.416	3.9
1668	20:37:50	19.698	65.412	3.9
1669	20:38:00	19.698	65.382	3.9
1670	20:38:10	19.698	65.382	3.9
1671	20:38:20	19.698	65.382	3.9
1672	20:38:30	19.698	65.352	11.8
1673	20:38:40	19.698	65.352	3.9
1674	20:38:50	19.698	65.352	11.8
1675	20:39:00	19.698	65.323	3.9
1676	20:39:10	19.698	65.323	3.9
1677	20:39:20	19.698	65.323	3.9
1678	20:39:30	19.698	65.293	3.9
1679	20:39:40	19.674	65.289	3.9
1680	20:39:50	19.674	65.289	3.9
1681	20:40:00	19.674	65.289	3.9
1682	20:40:10	19.674	65.259	3.9
1683	20:40:20	19.674	65.259	3.9
1684	20:40:30	19.674	65.259	11.8
1685	20:40:40	19.674	65.229	3.9
1686	20:40:50	19.674	65.229	3.9
1687	20:41:00	19.674	65.229	3.9
1688	20:41:10	19.674	65.229	11.8
1689	20:41:20	19.674	65.199	11.8
1690	20:41:30	19.674	65.199	3.9
1691	20:41:40	19.674	65.17	3.9
1692	20:41:50	19.674	65.17	3.9
1693	20:42:00	19.674	65.17	3.9
1694	20:42:10	19.674	65.17	11.8
1695	20:42:20	19.674	65.199	3.9
1696	20:42:30	19.651	65.225	3.9
1697	20:42:40	19.651	65.195	3.9
1698	20:42:50	19.651	65.225	11.8
1699	20:43:00	19.651	65.225	3.9
1700	20:43:10	19.651	65.225	11.8
1701	20:43:20	19.651	65.225	3.9
1702	20:43:30	19.651	65.225	3.9
1703	20:43:40	19.651	65.225	3.9
1704	20:43:50	19.651	65.225	11.8
1705	20:44:00	19.651	65.225	3.9
1706	20:44:10	19.651	65.195	3.9
1707	20:44:20	19.651	65.225	3.9
1708	20:44:30	19.651	65.195	11.8
1709	20:44:40	19.651	65.195	3.9
1710	20:44:50	19.651	65.195	3.9
1711	20:45:00	19.651	65.195	3.9
1712	20:45:10	19.651	65.166	3.9
1713	20:45:20	19.651	65.195	11.8
1714	20:45:30	19.651	65.195	3.9
1715	20:45:40	19.651	65.166	3.9
1716	20:45:50	19.651	65.166	3.9
1717	20:46:00	19.627	65.161	3.9
1718	20:46:10	19.651	65.166	3.9
1719	20:46:20	19.627	65.191	3.9
1720	20:46:30	19.627	65.191	3.9
1721	20:46:40	19.627	65.191	3.9
1722	20:46:50	19.627	65.161	11.8
1723	20:47:00	19.627	65.161	11.8
1724	20:47:10	19.627	65.161	3.9
1725	20:47:20	19.627	65.132	11.8
1726	20:47:30	19.651	65.136	3.9
1727	20:47:40	19.627	65.132	3.9
1728	20:47:50	19.627	65.132	3.9
1729	20:48:00	19.627	65.132	11.8
1730	20:48:10	19.627	65.102	3.9
1731	20:48:20	19.627	65.132	3.9
1732	20:48:30	19.627	65.132	3.9
1733	20:48:40	19.627	65.132	3.9
1734	20:48:50	19.627	65.132	11.8
1735	20:49:00	19.627	65.132	3.9
1736	20:49:10	19.627	65.132	3.9
1737	20:49:20	19.627	65.102	3.9
1738	20:49:30	19.627	65.102	3.9
1739	20:49:40	19.627	65.102	11.8
1740	20:49:50	19.627	65.132	3.9
1741	20:50:00	19.627	65.132	3.9
1742	20:50:10	19.627	65.132	3.9
1743	20:50:20	19.627	65.132	3.9
1744	20:50:30	19.627	65.132	11.8
1745	20:50:40	19.627	65.132	3.9
1746	20:50:50	19.627	65.132	3.9
1747	20:51:00	19.627	65.132	11.8
1748	20:51:10	19.627	65.132	3.9
1749	20:51:20	19.627	65.102	3.9
1750	20:51:30	19.627	65.102	3.9
1751	20:51:40	19.627	65.072	3.9
1752	20:51:50	19.627	65.102	3.9
1753	20:52:00	19.627	65.102	11.8
1754	20:52:10	19.627	65.072	11.8
1755	20:52:20	19.627	65.102	11.8
1756	20:52:30	19.627	65.072	3.9
1757	20:52:40	19.627	65.072	3.9
1758	20:52:50	19.627	65.072	3.9
1759	20:53:00	19.627	65.072	3.9
1760	20:53:10	19.627	65.042	3.9
1761	20:53:20	19.627	65.042	3.9
1762	20:53:30	19.627	65.042	3.9
1763	20:53:40	19.627	65.072	3.9
1764	20:53:50	19.627	65.042	11.8
1765	20:54:00	19.627	65.042	11.8
1766	20:54:10	19.627	65.042	3.9
1767	20:54:20	19.627	65.042	3.9
1768	20:54:30	19.627	65.042	11.8
1769	20:54:40	19.627	65.042	3.9
1770	20:54:50	19.627	65.013	3.9
1771	20:55:00	19.627	65.042	11.8
1772	20:55:10	19.627	65.013	3.9
1773	20:55:20	19.627	65.042	3.9
1774	20:55:30	19.627	65.042	3.9
1775	20:55:40	19.627	65.013	3.9
1776	20:55:50	19.627	65.013	3.9
1777	20:56:00	19.627	65.013	3.9
1778	20:56:10	19.627	65.013	11.8
1779	20:56:20	19.627	65.013	3.9
1780	20:56:30	19.627	64.983	11.8
1781	20:56:40	19.627	64.983	3.9
1782	20:56:50	19.627	64.983	3.9
1783	20:57:00	19.627	64.983	3.9
1784	20:57:10	19.627	64.983	3.9
1785	20:57:20	19.627	64.953	3.9
1786	20:57:30	19.651	64.957	3.9
1787	20:57:40	19.627	64.953	3.9
1788	20:57:50	19.651	64.957	3.9
1789	20:58:00	19.627	64.953	3.9
1790	20:58:10	19.627	64.953	11.8
1791	20:58:20	19.651	64.927	3.9
1792	20:58:30	19.627	64.923	3.9
1793	20:58:40	19.651	64.927	3.9
1794	20:58:50	19.651	64.927	3.9
1795	20:59:00	19.651	64.927	11.8
1796	20:59:10	19.651	64.897	3.9
1797	20:59:20	19.651	64.897	11.8
1798	20:59:30	19.651	64.897	3.9
1799	20:59:40	19.651	64.897	3.9
1800	20:59:50	19.651	64.897	3.9
1801	21:00:00	19.651	64.897	3.9
1802	21:00:10	19.651	64.897	3.9
1803	21:00:20	19.651	64.897	3.9
1804	21:00:30	19.651	64.868	11.8
1805	21:00:40	19.651	64.868	3.9
1806	21:00:50	19.651	64.868	3.9
1807	21:01:00	19.651	64.868	11.8
1808	21:01:10	19.651	64.868	3.9
1809	21:01:20	19.651	64.868	3.9
1810	21:01:30	19.651	64.838	3.9
1811	21:01:40	19.651	64.838	3.9
1812	21:01:50	19.651	64.838	3.9
1813	21:02:00	19.651	64.838	3.9
1814	21:02:10	19.651	64.808	3.9
1815	21:02:20	19.651	64.808	11.8
1816	21:02:30	19.651	64.778	3.9
1817	21:02:40	19.651	64.778	11.8
1818	21:02:50	19.651	64.778	3.9
1819	21:03:00	19.651	64.778	11.8
1820	21:03:10	19.674	64.782	3.9
1821	21:03:20	19.674	64.782	3.9
1822	21:03:30	19.651	64.808	3.9
1823	21:03:40	19.651	64.778	3.9
1824	21:03:50	19.651	64.808	3.9
1825	21:04:00	19.651	64.778	11.8
1826	21:04:10	19.674	64.782	3.9
1827	21:04:20	19.651	64.778	3.9
1828	21:04:30	19.674	64.753	3.9
1829	21:04:40	19.674	64.753	3.9
1830	21:04:50	19.674	64.753	3.9
1831	21:05:00	19.674	64.723	11.8
1832	21:05:10	19.674	64.753	3.9
1833	21:05:20	19.674	64.723	3.9
1834	21:05:30	19.674	64.723	3.9
1835	21:05:40	19.674	64.723	3.9
1836	21:05:50	19.674	64.723	3.9
1837	21:06:00	19.674	64.723	3.9
1838	21:06:10	19.674	64.723	3.9
1839	21:06:20	19.674	64.723	3.9
1840	21:06:30	19.674	64.723	3.9
1841	21:06:40	19.674	64.693	3.9
1842	21:06:50	19.674	64.693	3.9
1843	21:07:00	19.674	64.663	3.9
1844	21:07:10	19.674	64.663	11.8
1845	21:07:20	19.674	64.663	3.9
1846	21:07:30	19.674	64.633	3.9
1847	21:07:40	19.674	64.633	3.9
1848	21:07:50	19.674	64.633	3.9
1849	21:08:00	19.674	64.633	3.9
1850	21:08:10	19.674	64.603	3.9
1851	21:08:20	19.674	64.633	3.9
1852	21:08:30	19.674	64.603	3.9
1853	21:08:40	19.674	64.603	3.9
1854	21:08:50	19.674	64.603	11.8
1855	21:09:00	19.674	64.603	3.9
1856	21:09:10	19.674	64.603	3.9
1857	21:09:20	19.698	64.607	3.9
1858	21:09:30	19.698	64.578	3.9
1859	21:09:40	19.674	64.574	3.9
1860	21:09:50	19.698	64.578	3.9
1861	21:10:00	19.698	64.578	3.9
1862	21:10:10	19.698	64.578	3.9
1863	21:10:20	19.698	64.578	3.9
1864	21:10:30	19.698	64.548	3.9
1865	21:10:40	19.698	64.548	3.9
1866	21:10:50	19.698	64.518	3.9
1867	21:11:00	19.698	64.518	3.9
1868	21:11:10	19.698	64.518	3.9
1869	21:11:20	19.698	64.488	3.9
1870	21:11:30	19.698	64.518	3.9
1871	21:11:40	19.698	64.488	3.9
1872	21:11:50	19.698	64.488	3.9
1873	21:12:00	19.698	64.518	3.9
1874	21:12:10	19.698	64.518	3.9
1875	21:12:20	19.698	64.488	3.9
1876	21:12:30	19.698	64.518	3.9
1877	21:12:40	19.698	64.518	3.9
1878	21:12:50	19.698	64.518	3.9
1879	21:13:00	19.698	64.488	3.9
1880	21:13:10	19.698	64.488	11.8
1881	21:13:20	19.698	64.488	3.9
1882	21:13:30	19.698	64.488	11.8
1883	21:13:40	19.698	64.518	3.9
1884	21:13:50	19.722	64.492	3.9
1885	21:14:00	19.722	64.492	3.9
1886	21:14:10	19.698	64.488	3.9
1887	21:14:20	19.722	64.462	3.9
1888	21:14:30	19.722	64.462	3.9
1889	21:14:40	19.722	64.462	11.8
1890	21:14:50	19.722	64.432	3.9
1891	21:15:00	19.722	64.432	3.9
1892	21:15:10	19.722	64.432	3.9
1893	21:15:20	19.722	64.403	3.9
1894	21:15:30	19.722	64.432	3.9
1895	21:15:40	19.722	64.403	3.9
1896	21:15:50	19.722	64.403	3.9
1897	21:16:00	19.722	64.403	11.8
1898	21:16:10	19.722	64.432	3.9
1899	21:16:20	19.722	64.432	3.9
1900	21:16:30	19.722	64.432	3.9
1901	21:16:40	19.722	64.432	11.8
1902	21:16:50	19.722	64.432	3.9
1903	21:17:00	19.746	64.466	3.9
1904	21:17:10	19.722	64.432	3.9
1905	21:17:20	19.746	64.437	3.9
1906	21:17:30	19.746	64.437	3.9
1907	21:17:40	19.746	64.437	3.9
1908	21:17:50	19.746	64.437	3.9
1909	21:18:00	19.746	64.437	3.9
1910	21:18:10	19.746	64.437	11.8
1911	21:18:20	19.746	64.437	3.9
1912	21:18:30	19.746	64.437	3.9
1913	21:18:40	19.746	64.407	11.8
1914	21:18:50	19.746	64.407	3.9
1915	21:19:00	19.746	64.407	3.9
1916	21:19:10	19.746	64.407	3.9
1917	21:19:20	19.746	64.407	3.9
1918	21:19:30	19.746	64.377	3.9
1919	21:19:40	19.746	64.377	3.9
1920	21:19:50	19.746	64.377	3.9
1921	21:20:00	19.746	64.377	3.9
1922	21:20:10	19.746	64.377	3.9
1923	21:20:20	19.77	64.351	11.8
1924	21:20:30	19.746	64.347	11.8
1925	21:20:40	19.77	64.351	3.9
1926	21:20:50	19.746	64.347	3.9
1927	21:21:00	19.77	64.351	3.9
1928	21:21:10	19.77	64.321	3.9
1929	21:21:20	19.77	64.321	11.8
1930	21:21:30	19.77	64.321	11.8
1931	21:21:40	19.77	64.321	3.9
1932	21:21:50	19.77	64.321	11.8
1933	21:22:00	19.77	64.291	3.9
1934	21:22:10	19.77	64.291	11.8
1935	21:22:20	19.77	64.291	3.9
1936	21:22:30	19.77	64.261	3.9
1937	21:22:40	19.77	64.291	3.9
1938	21:22:50	19.77	64.261	3.9
1939	21:23:00	19.77	64.261	3.9
1940	21:23:10	19.77	64.261	3.9
1941	21:23:20	19.793	64.265	3.9
1942	21:23:30	19.77	64.231	3.9
1943	21:23:40	19.793	64.236	3.9
1944	21:23:50	19.77	64.231	11.8
1945	21:24:00	19.77	64.231	3.9
1946	21:24:10	19.793	64.236	3.9
1947	21:24:20	19.793	64.236	3.9
1948	21:24:30	19.793	64.206	3.9
1949	21:24:40	19.793	64.206	3.9
1950	21:24:50	19.793	64.206	3.9
1951	21:25:00	19.793	64.206	3.9
1952	21:25:10	19.793	64.206	3.9
1953	21:25:20	19.793	64.206	3.9
1954	21:25:30	19.793	64.176	3.9
1955	21:25:40	19.793	64.206	3.9
1956	21:25:50	19.793	64.206	3.9
1957	21:26:00	19.793	64.176	3.9
1958	21:26:10	19.817	64.18	3.9
1959	21:26:20	19.817	64.18	3.9
1960	21:26:30	19.817	64.15	3.9
1961	21:26:40	19.817	64.18	3.9
1962	21:26:50	19.817	64.18	3.9
1963	21:27:00	19.817	64.18	3.9
1964	21:27:10	19.817	64.18	3.9
1965	21:27:20	19.817	64.15	3.9
1966	21:27:30	19.817	64.15	3.9
1967	21:27:40	19.817	64.15	3.9
1968	21:27:50	19.817	64.15	3.9
1969	21:28:00	19.817	64.18	3.9
1970	21:28:10	19.817	64.15	11.8
1971	21:28:20	19.817	64.15	11.8
1972	21:28:30	19.817	64.15	3.9
1973	21:28:40	19.817	64.15	3.9
1974	21:28:50	19.841	64.154	3.9
1975	21:29:00	19.841	64.154	3.9
1976	21:29:10	19.841	64.154	3.9
1977	21:29:20	19.817	64.15	3.9
1978	21:29:30	19.841	64.154	3.9
1979	21:29:40	19.841	64.154	3.9
1980	21:29:50	19.841	64.154	3.9
1981	21:30:00	19.841	64.154	3.9
1982	21:30:10	19.841	64.154	3.9
1983	21:30:20	19.841	64.154	3.9
1984	21:30:30	19.841	64.154	3.9
1985	21:30:40	19.841	64.154	3.9
1986	21:30:50	19.841	64.124	3.9
1987	21:31:00	19.865	64.128	3.9
1988	21:31:10	19.865	64.128	3.9
1989	21:31:20	19.865	64.128	3.9
1990	21:31:30	19.865	64.158	3.9
1991	21:31:40	19.865	64.098	3.9
1992	21:31:50	19.865	64.038	3.9
1993	21:32:00	19.865	63.709	3.9
1994	21:32:10	19.865	63.709	11.8
1995	21:32:20	19.865	63.739	3.9
1996	21:32:30	19.865	63.739	3.9
1997	21:32:40	19.865	63.709	3.9
1998	21:32:50	19.865	63.649	3.9
1999	21:33:00	19.865	63.679	3.9
2000	21:33:10	19.865	63.679	3.9
2001	21:33:20	19.865	63.649	3.9
2002	21:33:30	19.865	63.739	3.9
2003	21:33:40	19.865	63.769	3.9
2004	21:33:50	19.865	63.799	3.9
2005	21:34:00	19.888	63.863	11.8
2006	21:34:10	19.865	63.889	3.9
2007	21:34:20	19.865	63.949	3.9
2008	21:34:30	19.888	63.983	3.9
2009	21:34:40	19.888	63.833	3.9
2010	21:34:50	19.888	63.773	3.9
2011	21:35:00	19.888	63.743	3.9
2012	21:35:10	19.888	63.773	3.9
2013	21:35:20	19.888	63.773	3.9
2014	21:35:30	19.888	63.773	3.9
2015	21:35:40	19.888	63.773	3.9
2016	21:35:50	19.888	63.803	3.9
2017	21:36:00	19.888	63.803	3.9
2018	21:36:10	19.888	63.833	3.9
2019	21:36:20	19.888	63.803	3.9
2020	21:36:30	19.912	63.837	3.9
2021	21:36:40	19.912	63.837	3.9
2022	21:36:50	19.912	63.807	3.9
2023	21:37:00	19.912	63.807	3.9
2024	21:37:10	19.912	63.807	3.9
2025	21:37:20	19.912	63.807	3.9
2026	21:37:30	19.912	63.777	3.9
2027	21:37:40	19.912	63.747	3.9
2028	21:37:50	19.912	63.747	3.9
2029	21:38:00	19.912	63.687	3.9
2030	21:38:10	19.912	63.687	3.9
2031	21:38:20	19.912	63.657	3.9
2032	21:38:30	19.912	63.627	11.8
2033	21:38:40	19.912	63.597	3.9
2034	21:38:50	19.912	63.567	3.9
2035	21:39:00	19.912	63.507	3.9
2036	21:39:10	19.912	63.477	3.9
2037	21:39:20	19.912	63.417	11.8
2038	21:39:30	19.888	63.384	3.9
2039	21:39:40	19.888	63.324	3.9
2040	21:39:50	19.888	63.294	3.9
2041	21:40:00	19.888	63.174	3.9
2042	21:40:10	19.888	63.083	3.9
2043	21:40:20	19.888	63.023	3.9
2044	21:40:30	19.865	62.989	11.8
2045	21:40:40	19.865	62.989	3.9
2046	21:40:50	19.865	62.959	3.9
2047	21:41:00	19.865	62.899	3.9
2048	21:41:10	19.841	62.835	3.9
2049	21:41:20	19.841	62.775	3.9
2050	21:41:30	19.841	62.745	3.9
2051	21:41:40	19.817	62.651	3.9
2052	21:41:50	19.817	62.651	3.9
2053	21:42:00	19.817	62.591	3.9
2054	21:42:10	19.793	62.527	3.9
2055	21:42:20	19.793	62.467	3.9
2056	21:42:30	19.77	62.403	11.8
2057	21:42:40	19.77	62.373	3.9
2058	21:42:50	19.77	62.312	11.8
2059	21:43:00	19.746	62.248	3.9
2060	21:43:10	19.746	62.218	3.9
2061	21:43:20	19.722	62.184	3.9
2062	21:43:30	19.722	62.124	11.8
2063	21:43:40	19.698	62.09	3.9
2064	21:43:50	19.698	62.06	11.8
2065	21:44:00	19.698	62	3.9
2066	21:44:10	19.674	61.966	3.9
2067	21:44:20	19.674	61.935	3.9
2068	21:44:30	19.651	61.871	3.9
2069	21:44:40	19.651	61.871	3.9
2070	21:44:50	19.651	61.811	3.9
2071	21:45:00	19.627	61.777	3.9
2072	21:45:10	19.627	61.747	11.8
2073	21:45:20	19.603	61.743	11.8
2074	21:45:30	19.603	61.713	3.9
2075	21:45:40	19.579	61.679	3.9
2076	21:45:50	19.579	61.679	3.9
2077	21:46:00	19.579	61.619	3.9
2078	21:46:10	19.555	61.615	3.9
2079	21:46:20	19.532	61.581	3.9
2080	21:46:30	19.532	61.581	3.9
2081	21:46:40	19.532	61.55	3.9
2082	21:46:50	19.532	61.52	3.9
2083	21:47:00	19.508	61.516	3.9
2084	21:47:10	19.484	61.482	3.9
2085	21:47:20	19.484	61.452	11.8
2086	21:47:30	19.484	61.422	11.8
2087	21:47:40	19.46	61.388	3.9
2088	21:47:50	19.46	61.388	3.9
2089	21:48:00	19.436	61.354	3.9
2090	21:48:10	19.436	61.324	3.9
2091	21:48:20	19.436	61.294	3.9
2092	21:48:30	19.413	61.26	3.9
2093	21:48:40	19.389	61.135	3.9
2094	21:48:50	19.389	61.105	3.9
2095	21:49:00	19.389	61.165	3.9
2096	21:49:10	19.365	61.161	3.9
2097	21:49:20	19.365	61.131	3.9
2098	21:49:30	19.341	61.097	3.9
2099	21:49:40	19.341	61.067	3.9
2100	21:49:50	19.341	61.037	3.9
2101	21:50:00	19.318	61.033	3.9
2102	21:50:10	19.318	61.003	3.9
2103	21:50:20	19.294	60.969	3.9
2104	21:50:30	19.294	60.939	11.8
2105	21:50:40	19.294	60.939	11.8
2106	21:50:50	19.27	60.935	3.9
2107	21:51:00	19.27	60.935	3.9
2108	21:51:10	19.27	60.905	3.9
2109	21:51:20	19.246	60.901	3.9
2110	21:51:30	19.246	60.901	3.9
2111	21:51:40	19.246	60.901	3.9
2112	21:51:50	19.246	60.901	11.8
2113	21:52:00	19.222	60.867	3.9
2114	21:52:10	19.222	60.867	3.9
2115	21:52:20	19.222	60.837	3.9
2116	21:52:30	19.199	60.803	3.9
2117	21:52:40	19.199	60.803	3.9
2118	21:52:50	19.199	60.803	3.9
2119	21:53:00	19.175	60.768	3.9
2120	21:53:10	19.175	60.768	3.9
2121	21:53:20	19.175	60.738	3.9
2122	21:53:30	19.175	60.738	3.9
2123	21:53:40	19.151	60.704	11.8
2124	21:53:50	19.151	60.432	3.9
2125	21:54:00	19.151	60.342	3.9
2126	21:54:10	19.151	60.493	3.9
2127	21:54:20	19.127	60.61	3.9
2128	21:54:30	19.151	60.644	3.9
2129	21:54:40	19.127	60.731	3.9
2130	21:54:50	19.127	60.761	3.9
2131	21:55:00	19.127	60.791	3.9
2132	21:55:10	19.127	60.821	11.8
2133	21:55:20	19.127	60.882	3.9
2134	21:55:30	19.103	60.908	3.9
2135	21:55:40	19.127	60.942	3.9
2136	21:55:50	19.103	60.998	3.9
2137	21:56:00	19.103	61.059	3.9
2138	21:56:10	19.103	61.089	3.9
2139	21:56:20	19.103	61.149	3.9
2140	21:56:30	19.103	61.24	3.9
2141	21:56:40	19.103	61.33	3.9
2142	21:56:50	19.103	61.39	3.9
2143	21:57:00	19.103	61.42	11.8
2144	21:57:10	19.103	61.541	3.9
2145	21:57:20	19.127	61.665	3.9
2146	21:57:30	19.127	61.755	11.8
2147	21:57:40	19.127	61.815	3.9
2148	21:57:50	19.127	61.906	3.9
2149	21:58:00	19.151	62	11.8
2150	21:58:10	19.151	62.06	3.9
2151	21:58:20	19.151	62.15	3.9
2152	21:58:30	19.175	62.214	3.9
2153	21:58:40	19.175	62.274	3.9
2154	21:58:50	19.175	62.334	3.9
2155	21:59:00	19.199	62.368	3.9
2156	21:59:10	19.199	62.368	3.9
2157	21:59:20	19.199	62.398	11.8
2158	21:59:30	19.222	62.402	3.9
2159	21:59:40	19.222	62.402	3.9
2160	21:59:50	19.246	62.406	3.9
2161	22:00:00	19.246	62.376	3.9
2162	22:00:10	19.246	62.346	3.9
2163	22:00:20	19.246	62.316	3.9
2164	22:00:30	19.246	62.316	3.9
2165	22:00:40	19.27	62.29	3.9
2166	22:00:50	19.27	62.23	3.9
2167	22:01:00	19.27	62.17	3.9
2168	22:01:10	19.27	62.11	3.9
2169	22:01:20	19.27	62.049	3.9
2170	22:01:30	19.294	62.023	3.9
2171	22:01:40	19.294	61.993	3.9
2172	22:01:50	19.294	61.963	3.9
2173	22:02:00	19.294	61.933	3.9
2174	22:02:10	19.294	61.903	3.9
2175	22:02:20	19.294	61.873	3.9
2176	22:02:30	19.294	61.843	3.9
2177	22:02:40	19.318	61.817	3.9
2178	22:02:50	19.318	61.817	3.9
2179	22:03:00	19.318	61.787	11.8
2180	22:03:10	19.318	61.756	3.9
2181	22:03:20	19.318	61.756	3.9
2182	22:03:30	19.318	61.756	3.9
2183	22:03:40	19.318	61.726	3.9
2184	22:03:50	19.318	61.756	3.9
2185	22:04:00	19.318	61.726	3.9
2186	22:04:10	19.318	61.726	11.8
2187	22:04:20	19.318	61.756	3.9
2188	22:04:30	19.318	61.726	3.9
2189	22:04:40	19.318	61.726	3.9
2190	22:04:50	19.318	61.696	3.9
2191	22:05:00	19.318	61.696	11.8
2192	22:05:10	19.318	61.666	3.9
2193	22:05:20	19.318	61.636	11.8
2194	22:05:30	19.318	61.666	3.9
2195	22:05:40	19.341	61.7	3.9
2196	22:05:50	19.318	61.696	11.8
2197	22:06:00	19.318	61.696	3.9
2198	22:06:10	19.318	61.726	3.9
2199	22:06:20	19.318	61.756	3.9
2200	22:06:30	19.341	61.79	3.9
2201	22:06:40	19.318	61.787	3.9
2202	22:06:50	19.318	61.847	3.9
2203	22:07:00	19.341	61.911	3.9
2204	22:07:10	19.341	61.971	3.9
2205	22:07:20	19.341	62.001	11.8
2206	22:07:30	19.341	62.061	3.9
2207	22:07:40	19.341	62.091	3.9
2208	22:07:50	19.341	62.151	3.9
2209	22:08:00	19.341	62.212	3.9
2210	22:08:10	19.341	62.272	3.9
2211	22:08:20	19.365	62.366	11.8
2212	22:08:30	19.365	62.396	3.9
2213	22:08:40	19.365	62.456	3.9
2214	22:08:50	19.365	62.546	3.9
2215	22:09:00	19.389	62.58	3.9
2216	22:09:10	19.389	62.64	3.9
2217	22:09:20	19.389	62.7	3.9
2218	22:09:30	19.389	62.76	3.9
2219	22:09:40	19.413	62.824	3.9
2220	22:09:50	19.413	62.884	3.9
2221	22:10:00	19.413	62.944	3.9
2222	22:10:10	19.436	63.008	3.9
2223	22:10:20	19.436	63.068	3.9
2224	22:10:30	19.46	63.162	11.8
2225	22:10:40	19.46	63.222	3.9
2226	22:10:50	19.484	63.286	3.9
2227	22:11:00	19.484	63.345	3.9
2228	22:11:10	19.484	63.405	3.9
2229	22:11:20	19.508	63.439	3.9
2230	22:11:30	19.508	63.499	3.9
2231	22:11:40	19.532	63.563	3.9
2232	22:11:50	19.532	63.593	3.9
2233	22:12:00	19.555	63.657	11.8
2234	22:12:10	19.555	63.717	3.9
2235	22:12:20	19.579	63.781	3.9
2236	22:12:30	19.579	63.81	11.8
2237	22:12:40	19.603	63.874	11.8
2238	22:12:50	19.627	63.938	3.9
2239	22:13:00	19.627	63.968	11.8
2240	22:13:10	19.651	64.032	3.9
2241	22:13:20	19.651	64.062	3.9
2242	22:13:30	19.674	64.096	3.9
2243	22:13:40	19.674	64.155	3.9
2244	22:13:50	19.698	64.219	3.9
2245	22:14:00	19.722	64.253	3.9
2246	22:14:10	19.722	64.313	3.9
2247	22:14:20	19.746	64.347	3.9
2248	22:14:30	19.77	64.411	3.9
2249	22:14:40	19.77	64.5	3.9
2250	22:14:50	19.793	64.534	11.8
2251	22:15:00	19.817	64.598	3.9
2252	22:15:10	19.817	64.658	3.9
2253	22:15:20	19.841	64.751	3.9
2254	22:15:30	19.841	64.811	3.9
2255	22:15:40	19.865	64.845	3.9
2256	22:15:50	19.888	64.879	3.9
2257	22:16:00	19.888	64.879	3.9
2258	22:16:10	19.912	64.913	11.8
2259	22:16:20	19.936	64.917	3.9
2260	22:16:30	19.936	64.917	3.9
2261	22:16:40	19.96	64.921	3.9
2262	22:16:50	19.984	64.895	11.8
2263	22:17:00	19.984	64.895	3.9
2264	22:17:10	20.007	64.84	3.9
2265	22:17:20	20.007	64.84	11.8
2266	22:17:30	20.031	64.814	3.9
2267	22:17:40	20.031	64.784	3.9
2268	22:17:50	20.055	64.758	3.9
2269	22:18:00	20.079	64.703	3.9
2270	22:18:10	20.079	64.673	3.9
2271	22:18:20	20.103	64.647	3.9
2272	22:18:30	20.103	64.617	3.9
2273	22:18:40	20.126	64.561	3.9
2274	22:18:50	20.126	64.502	11.8
2275	22:19:00	20.126	64.442	3.9
2276	22:19:10	20.15	64.416	11.8
2277	22:19:20	20.15	64.356	3.9
2278	22:19:30	20.15	64.296	11.8
2279	22:19:40	20.174	64.27	3.9
2280	22:19:50	20.174	64.211	3.9
2281	22:20:00	20.174	64.151	3.9
2282	22:20:10	20.174	64.091	11.8
2283	22:20:20	20.198	64.065	11.8
2284	22:20:30	20.198	63.975	3.9
2285	22:20:40	20.198	63.945	3.9
2286	22:20:50	20.198	63.885	3.9
2287	22:21:00	20.198	63.855	3.9
2288	22:21:10	20.198	63.795	3.9
2289	22:21:20	20.198	63.735	3.9
2290	22:21:30	20.198	63.705	3.9
2291	22:21:40	20.198	63.646	3.9
2292	22:21:50	20.198	63.616	3.9
2293	22:22:00	20.222	63.59	3.9
2294	22:22:10	20.222	63.53	3.9
2295	22:22:20	20.222	63.53	3.9
2296	22:22:30	20.222	63.5	3.9
2297	22:22:40	20.222	63.47	3.9
2298	22:22:50	20.222	63.47	3.9
2299	22:23:00	20.222	63.44	3.9
2300	22:23:10	20.222	63.44	3.9
2301	22:23:20	20.222	63.41	3.9
2302	22:23:30	20.222	63.41	11.8
2303	22:23:40	20.222	63.41	11.8
2304	22:23:50	20.222	63.379	3.9
2305	22:24:00	20.246	63.383	3.9
2306	22:24:10	20.222	63.379	3.9
2307	22:24:20	20.246	63.383	11.8
2308	22:24:30	20.246	63.383	3.9
2309	22:24:40	20.246	63.383	3.9
2310	22:24:50	20.246	63.383	3.9
2311	22:25:00	20.246	63.383	3.9
2312	22:25:10	20.246	63.383	3.9
2313	22:25:20	20.246	63.414	11.8
2314	22:25:30	20.246	63.414	3.9
2315	22:25:40	20.246	63.444	3.9
2316	22:25:50	20.246	63.414	11.8
2317	22:26:00	20.246	63.444	3.9
2318	22:26:10	20.246	63.414	3.9
2319	22:26:20	20.246	63.414	11.8
2320	22:26:30	20.246	63.383	3.9
2321	22:26:40	20.269	63.357	11.8
2322	22:26:50	20.269	63.327	3.9
2323	22:27:00	20.269	63.297	3.9
2324	22:27:10	20.269	63.267	3.9
2325	22:27:20	20.269	63.207	3.9
2326	22:27:30	20.269	63.177	3.9
2327	22:27:40	20.269	63.117	3.9
2328	22:27:50	20.269	63.057	3.9
2329	22:28:00	20.269	62.997	3.9
2330	22:28:10	20.269	62.937	3.9
2331	22:28:20	20.269	62.907	3.9
2332	22:28:30	20.269	62.847	3.9
2333	22:28:40	20.269	62.786	3.9
2334	22:28:50	20.269	62.756	3.9
2335	22:29:00	20.269	62.696	11.8
2336	22:29:10	20.269	62.666	3.9
2337	22:29:20	20.269	62.606	3.9
2338	22:29:30	20.246	62.542	3.9
2339	22:29:40	20.246	62.481	3.9
2340	22:29:50	20.246	62.421	3.9
2341	22:30:00	20.246	62.361	3.9
2342	22:30:10	20.246	62.331	3.9
2343	22:30:20	20.246	62.271	11.8
2344	22:30:30	20.246	62.21	3.9
2345	22:30:40	20.246	62.15	3.9
2346	22:30:50	20.222	62.116	3.9
2347	22:31:00	20.222	62.056	3.9
2348	22:31:10	20.222	62.025	3.9
2349	22:31:20	20.222	61.965	3.9
2350	22:31:30	20.222	61.875	3.9
2351	22:31:40	20.198	61.81	3.9
2352	22:31:50	20.198	61.78	11.8
2353	22:32:00	20.198	61.72	11.8
2354	22:32:10	20.198	61.659	3.9
2355	22:32:20	20.198	61.599	3.9
2356	22:32:30	20.174	61.535	3.9
2357	22:32:40	20.174	61.504	3.9
2358	22:32:50	20.15	61.44	3.9
2359	22:33:00	20.15	61.349	11.8
2360	22:33:10	20.15	61.319	3.9
2361	22:33:20	20.126	61.255	3.9
2362	22:33:30	20.126	61.255	3.9
2363	22:33:40	20.126	61.194	3.9
2364	22:33:50	20.103	61.191	3.9
2365	22:34:00	20.103	61.16	3.9
2366	22:34:10	20.103	61.13	3.9
2367	22:34:20	20.079	61.096	3.9
2368	22:34:30	20.079	60.884	3.9
2369	22:34:40	20.079	60.763	3.9
2370	22:34:50	20.055	60.82	3.9
2371	22:35:00	20.055	60.85	11.8
2372	22:35:10	20.031	60.876	3.9
2373	22:35:20	20.031	60.876	3.9
2374	22:35:30	20.031	60.907	3.9
2375	22:35:40	20.031	60.937	11.8
2376	22:35:50	20.007	60.994	3.9
2377	22:36:00	20.007	60.994	3.9
2378	22:36:10	20.007	61.054	3.9
2379	22:36:20	20.007	61.115	3.9
2380	22:36:30	19.984	61.141	3.9
2381	22:36:40	19.984	61.171	3.9
2382	22:36:50	19.984	61.201	3.9
2383	22:37:00	19.96	61.258	3.9
2384	22:37:10	19.96	61.288	3.9
2385	22:37:20	19.96	61.349	3.9
2386	22:37:30	19.96	61.409	3.9
2387	22:37:40	19.96	61.439	3.9
2388	22:37:50	19.96	61.5	11.8
2389	22:38:00	19.96	61.56	3.9
2390	22:38:10	19.96	61.62	3.9
2391	22:38:20	19.96	61.651	3.9
2392	22:38:30	19.96	61.711	3.9
2393	22:38:40	19.96	61.741	3.9
2394	22:38:50	19.936	61.798	3.9
2395	22:39:00	19.96	61.832	3.9
2396	22:39:10	19.936	61.888	3.9
2397	22:39:20	19.96	61.922	3.9
2398	22:39:30	19.96	61.982	3.9
2399	22:39:40	19.936	62.009	3.9
2400	22:39:50	19.96	62.043	3.9
2401	22:40:00	19.96	62.103	3.9
2402	22:40:10	19.96	62.133	3.9
2403	22:40:20	19.96	62.163	3.9
2404	22:40:30	19.96	62.223	3.9
2405	22:40:40	19.96	62.223	3.9
2406	22:40:50	19.96	62.284	3.9
2407	22:41:00	19.96	62.314	3.9
2408	22:41:10	19.96	62.344	11.8
2409	22:41:20	19.96	62.374	11.8
2410	22:41:30	19.96	62.434	3.9
2411	22:41:40	19.96	62.434	3.9
2412	22:41:50	19.984	62.498	11.8
2413	22:42:00	19.984	62.528	3.9
2414	22:42:10	19.984	62.558	3.9
2415	22:42:20	19.984	62.558	3.9
2416	22:42:30	19.984	62.589	11.8
2417	22:42:40	19.984	62.619	3.9
2418	22:42:50	19.984	62.679	3.9
2419	22:43:00	19.984	62.679	3.9
2420	22:43:10	20.007	62.713	11.8
2421	22:43:20	20.007	62.743	3.9
2422	22:43:30	20.007	62.833	11.8
2423	22:43:40	20.007	64.272	161.6		at home
2424	22:43:50	20.031	63.797	161.6
2425	22:44:00	20.031	63.408	169.5
2426	22:44:10	20.055	63.141	177.4
2427	22:44:20	20.079	62.965	177.4
2428	22:44:30	20.103	62.969	177.4
2429	22:44:40	20.126	62.552	177.4
2430	22:44:50	20.15	62.315	185.3
2431	22:45:00	20.174	62.198	185.3
2432	22:45:10	20.198	62.233	11.8
2433	22:45:20	20.222	62.176	3.9
2434	22:45:30	20.269	62.033	3.9
2435	22:45:40	20.293	61.916	3.9
2436	22:45:50	20.317	61.89	3.9
2437	22:46:00	20.317	61.8	3.9
2438	22:46:10	20.365	61.717	3.9
2439	22:46:20	20.388	61.539	3.9
2440	22:46:30	20.412	61.332	3.9
2441	22:46:40	20.436	61.184	3.9
2442	22:46:50	20.436	61.093	3.9
2443	22:47:00	20.46	60.915	3.9
2444	22:47:10	20.484	60.889	3.9
2445	22:47:20	20.507	60.771	3.9
2446	22:47:30	20.507	60.711	3.9
2447	22:47:40	20.531	60.593	11.8
2448	22:47:50	20.555	60.567	3.9
2449	22:48:00	20.555	60.506	3.9
2450	22:48:10	20.579	60.449	3.9
2451	22:48:20	20.579	60.358	3.9
2452	22:48:30	20.603	60.271	3.9
2453	22:48:40	20.627	60.244	3.9
2454	22:48:50	20.627	60.153	3.9
2455	22:49:00	20.65	60.126	11.8
2456	22:49:10	20.674	60.1	3.9
2457	22:49:20	20.674	59.978	3.9
2458	22:49:30	20.674	59.917	3.9
2459	22:49:40	20.698	59.86	3.9
2460	22:49:50	20.722	59.529	3.9
2461	22:50:00	20.722	59.681	3.9
2462	22:50:10	20.746	59.746	3.9
2463	22:50:20	20.746	59.746	3.9
2464	22:50:30	20.77	59.75	3.9
2465	22:50:40	20.77	59.719	11.8
2466	22:50:50	20.77	59.658	3.9
2467	22:51:00	20.793	59.632	3.9
2468	22:51:10	20.793	59.601	3.9
2469	22:51:20	20.817	59.574	3.9
2470	22:51:30	20.817	59.544	3.9
2471	22:51:40	20.817	59.483	3.9
2472	22:51:50	20.841	59.426	3.9
2473	22:52:00	20.841	59.365	3.9
2474	22:52:10	20.841	59.365	3.9
2475	22:52:20	20.865	59.338	3.9
2476	22:52:30	20.865	59.429	90.7
2477	22:52:40	20.865	59.399	145.8
2478	22:52:50	20.889	59.403	153.7
2479	22:53:00	20.889	59.342	161.6
2480	22:53:10	20.913	59.254	169.5
2481	22:53:20	20.913	59.132	3.9
2482	22:53:30	20.913	59.437	3.9
2483	22:53:40	20.913	59.376	3.9
2484	22:53:50	20.936	59.288	3.9
2485	22:54:00	20.936	59.166	106.4
2486	22:54:10	20.96	59.383	169.5
2487	22:54:20	20.96	59.231	169.5
2488	22:54:30	20.96	59.17	177.4
2489	22:54:40	20.96	59.109	177.4
2490	22:54:50	20.984	58.96	177.4
2491	22:55:00	20.984	58.96	185.3
2492	22:55:10	20.984	58.96	185.3
2493	22:55:20	20.984	58.99	185.3
2494	22:55:30	21.008	58.994	11.8
2495	22:55:40	21.008	59.024	3.9
2496	22:55:50	21.008	59.086	3.9
2497	22:56:00	21.032	59.181	11.8
2498	22:56:10	21.032	59.181	3.9
2499	22:56:20	21.032	59.12	3.9
2500	22:56:30	21.032	59.028	3.9
2501	22:56:40	21.056	58.971	3.9
[truncated: 6,130 more rows]

## Sheet: 20170429_NangGung
Plot Title: 20034486_20170428_MiaoLi
#	Date Time, GMT+08:00	Temp, °C (LGR S/N: 20034486, SEN S/N: 20034486)	RH, % (LGR S/N: 20034486, SEN S/N: 20034486)	Intensity, Lux (LGR S/N: 20034486, SEN S/N: 20034486)	Temp, °C (LGR S/N: 20034486, SEN S/N: 20034486)	Host Connected (LGR S/N: 20034486)	End Of File (LGR S/N: 20034486)
159	17:56:20	23.881	51.488	2771.1	71.769
160	17:56:30	23.833	52.207	1541.3	71.022
161	17:56:40	23.761	52.89	1383.6	70.458
162	17:56:50	23.665	54.382	67	70.29
163	17:57:00	23.521	54.017	35.5	70.458
164	17:57:10	23.424	54.003	185.3	70.458
165	17:57:20	23.328	54.709	74.9	70.458
166	17:57:30	23.184	55.467	532.2	70.458
167	17:57:40	23.088	56.075	114.3	70.458
168	17:57:50	22.968	55.84	90.7	70.458
169	17:58:00	22.848	56.969	216.8	70.458
170	17:58:10	22.753	59.235	350.8	70.458
171	17:58:20	22.633	60.411	540	70.402
172	17:58:30	22.585	61.014	910.6	70.29
173	17:58:40	22.441	62.633	374.5	70.235
174	17:58:50	22.369	64.795	950	70.068
175	17:59:00	22.321	66.884	942.1	69.847		Temp-av	temp-std	RH-av	Rh-std	Intensity, Lux-av	Int-std		interval
176	17:59:10	22.226	68.118	886.9	69.627		19.8267	1.08419	76.9035	4.37833	390.828	249.655	4/29/2017	17:59-18:25
177	17:59:20	22.178	66.052	879	69.463
178	17:59:30	22.106	65.47	871.2	69.299
179	17:59:40	22.058	65.042	863.3	69.137
180	17:59:50	22.011	65.184	855.4	68.975
181	18:00:00	21.963	66.343	839.6	68.813
182	18:00:10	21.915	68.299	839.6	68.653
183	18:00:20	21.843	69.588	831.7	68.653
184	18:00:30	21.795	70.875	823.9	68.599
185	18:00:40	21.748	71.687	808.1	68.599
186	18:00:50	21.7	71.326	800.2	68.546
187	18:01:00	21.652	70.642	800.2	68.493
188	18:01:10	21.604	69.367	792.3	68.439
189	18:01:20	21.581	70.188	784.4	68.439
190	18:01:30	21.533	70.473	776.6	68.386
191	18:01:40	21.485	71.461	768.7	68.386
192	18:01:50	21.461	71.837	760.8	68.333
193	18:02:00	21.437	72.008	752.9	68.333
194	18:02:10	21.39	72.641	745	68.28
195	18:02:20	21.366	70.853	737.1	68.227
196	18:02:30	21.318	70.169	729.2	68.175
197	18:02:40	21.294	70.693	721.4	68.175
198	18:02:50	21.246	71.562	713.5	68.122
199	18:03:00	21.223	71.704	705.6	68.069
200	18:03:10	21.175	71.899	697.7	67.964
201	18:03:20	21.151	71.047	689.8	67.859
202	18:03:30	21.103	71.74	681.9	67.807
203	18:03:40	21.079	72.959	674.1	67.807
204	18:03:50	21.032	72.95	674.1	67.755
205	18:04:00	21.008	72.451	666.2	67.755
206	18:04:10	20.984	73.231	658.3	67.702
207	18:04:20	20.936	74.842	650.4	67.702
208	18:04:30	20.913	73.188	642.5	67.65
209	18:04:40	20.865	73.005	634.6	67.65
210	18:04:50	20.841	73.348	626.8	67.598
211	18:05:00	20.793	72.409	618.9	67.546
212	18:05:10	20.77	72.783	611	67.546
213	18:05:20	20.746	72.051	611	67.494
214	18:05:30	20.722	71.813	603.1	67.494
215	18:05:40	20.674	72.125	595.2	67.443
216	18:05:50	20.65	73.34	587.3	67.391
217	18:06:00	20.603	73.707	579.5	67.339
218	18:06:10	20.579	72.833	571.6	67.339
219	18:06:20	20.555	73.119	563.7	67.287
220	18:06:30	20.531	73.693	555.8	67.236
221	18:06:40	20.484	73.25	547.9	67.133
222	18:06:50	20.46	74.43	547.9	67.082
223	18:07:00	20.412	75.773	540	67.03
224	18:07:10	20.388	75.481	532.2	67.03
225	18:07:20	20.341	74.176	524.3	67.03
226	18:07:30	20.317	74.402	516.4	67.03
227	18:07:40	20.293	75.634	508.5	67.03
228	18:07:50	20.269	75.515	508.5	67.03
229	18:08:00	20.246	75.768	500.6	67.03
230	18:08:10	20.198	76.474	492.7	67.03
231	18:08:20	20.174	75.754	484.9	67.03
232	18:08:30	20.15	76.264	477	67.03
233	18:08:40	20.126	76.917	477	67.03
234	18:08:50	20.103	77.14	469.1	67.03
235	18:09:00	20.079	77.932	461.2	67.03
236	18:09:10	20.055	77.557	453.3	67.03
237	18:09:20	20.031	76.783	453.3	67.03
238	18:09:30	20.007	77.291	445.4	67.03
239	18:09:40	19.984	77.229	437.5	67.03
240	18:09:50	19.96	77.31	429.7	67.03
241	18:10:00	19.936	78.243	421.8	67.03
242	18:10:10	19.912	78.039	421.8	67.03
243	18:10:20	19.912	76.644	413.9	67.03
244	18:10:30	19.888	76.24	390.2	67.03
245	18:10:40	19.865	76.235	406	67.03
246	18:10:50	19.865	76.606	398.1	67.03
247	18:11:00	19.817	76.739	390.2	67.03
248	18:11:10	19.793	77.162	382.4	67.03
249	18:11:20	19.77	76.758	382.4	67.03
250	18:11:30	19.746	77.55	374.5	67.03
251	18:11:40	19.722	77.858	366.6	67.03
252	18:11:50	19.698	77.341	366.6	67.03
253	18:12:00	19.674	77.422	358.7	67.03
254	18:12:10	19.674	77.251	358.7	67.03
255	18:12:20	19.627	77.951	350.8	67.03
256	18:12:30	19.603	79.304	350.8	67.03
257	18:12:40	19.603	78.655	342.9	67.03
258	18:12:50	19.579	79.102	335.1	67.03
259	18:13:00	19.555	78.503	335.1	67.03
260	18:13:10	19.532	77.818	327.2	67.03
261	18:13:20	19.532	78.243	319.3	67.03
262	18:13:30	19.508	78.889	319.3	67.03
263	18:13:40	19.484	78.545	311.4	67.03
264	18:13:50	19.46	79.02	303.5	67.03
265	18:14:00	19.436	79.071	303.5	67.03
266	18:14:10	19.436	78.337	295.6	67.03
267	18:14:20	19.413	78.728	256.2	67.03
268	18:14:30	19.389	78.638	279.9	67.03
269	18:14:40	19.365	78.774	279.9	67.03
270	18:14:50	19.365	78.802	264.1	67.03
271	18:15:00	19.341	78.713	264.1	67.03
272	18:15:10	19.341	78.797	272	67.03
273	18:15:20	19.318	78.849	256.2	67.03
274	18:15:30	19.294	78.731	256.2	67.03
275	18:15:40	19.27	78.5	256.2	67.03
276	18:15:50	19.246	78.184	256.2	67.03
277	18:16:00	19.246	78.014	232.6	67.03
278	18:16:10	19.222	78.377	240.5	67.03
279	18:16:20	19.199	79.049	240.5	67.03
280	18:16:30	19.175	79.467	232.6	67.03
281	18:16:40	19.151	78.842	232.6	67.03
282	18:16:50	19.127	78.47	224.7	67.03
283	18:17:00	19.103	78.916	224.7	67.03
284	18:17:10	19.103	80.042	216.8	67.03
285	18:17:20	19.08	81.409	216.8	67.03
286	18:17:30	19.056	81.571	208.9	67.03
287	18:17:40	19.032	81.259	208.9	67.03
288	18:17:50	19.032	81.342	201	67.03
289	18:18:00	19.008	81.198	201	67.03
290	18:18:10	19.008	80.218	201	67.03
291	18:18:20	19.008	80.414	193.2	67.03
292	18:18:30	18.985	80.857	185.3	67.03
293	18:18:40	18.985	80.689	169.5	67.03
294	18:18:50	18.961	80.544	177.4	67.03
295	18:19:00	18.937	80.062	177.4	67.03
296	18:19:10	18.913	80.618	177.4	67.03
297	18:19:20	18.913	80.618	169.5	67.03
298	18:19:30	18.889	81.032	169.5	67.03
299	18:19:40	18.866	81.083	161.6	67.082
300	18:19:50	18.866	80.496	161.6	67.03
301	18:20:00	18.866	80.468	161.6	67.03
302	18:20:10	18.866	80.635	153.7	67.03
303	18:20:20	18.842	80.714	153.7	67.03
304	18:20:30	18.818	80.625	153.7	67.03
305	18:20:40	18.818	80.541	145.8	67.082
306	18:20:50	18.794	80.564	145.8	67.133
307	18:21:00	18.771	80.839	138	67.133
308	18:21:10	18.771	81.09	130.1	67.184
309	18:21:20	18.723	81.136	130.1	67.236
310	18:21:30	18.723	80.912	130.1	67.287
311	18:21:40	18.723	80.744	122.2	67.339
312	18:21:50	18.723	81.191	122.2	67.443
313	18:22:00	18.699	81.326	114.3	67.546
314	18:22:10	18.675	81.794	114.3	67.598
315	18:22:20	18.652	81.844	114.3	67.702
316	18:22:30	18.628	82.006	114.3	67.807
317	18:22:40	18.628	81.756	114.3	67.859
318	18:22:50	18.628	81.561	106.4	67.859
319	18:23:00	18.628	81.644	106.4	67.912
320	18:23:10	18.604	81.639	106.4	67.912
321	18:23:20	18.604	81.611	98.5	67.964
322	18:23:30	18.58	81.606	98.5	68.016
323	18:23:40	18.557	82.074	98.5	68.069
324	18:23:50	18.557	82.213	90.7	68.175
325	18:24:00	18.533	82.651	90.7	68.28
326	18:24:10	18.533	82.068	90.7	68.333
327	18:24:20	18.509	82.258	90.7	68.439
328	18:24:30	18.509	82.147	90.7	68.546
329	18:24:40	18.39	80.421	59.1	68.653
330	18:24:50	18.2	78.303	35.5	68.706
331	18:25:00	18.033	80.176	11.8	68.706
332	18:25:10	18.129	82.7	11.8	68.706
333	18:25:20	18.152	83.616	11.8	68.706
334	18:25:30	18.152	83.616	11.8	68.706
335	18:25:40	18.176	83.787	11.8	68.706
336	18:25:50	18.152	83.175	11.8	68.706
337	18:26:00	18.152	83.009	11.8	68.706	flash
338	18:26:10	18.129	83.335	11.8	68.706
339	18:26:20	18.105	84.101	11.8	68.706
340	18:26:30	18.081	83.711	11.8	68.706
341	18:26:40	18.081	83.628	11.8	68.706
342	18:26:50	18.057	83.843	11.8	68.706
343	18:27:00	18.01	83.474	11.8	68.76
344	18:27:10	17.986	84.184	11.8	68.706
345	18:27:20	17.962	84.206	3.9	68.706
346	18:27:30	17.962	83.987	11.8	68.706
347	18:27:40	17.915	83.976	11.8	68.706
348	18:27:50	17.915	83.342	3.9	68.706
349	18:28:00	17.891	83.116	11.8	68.706
350	18:28:10	17.867	83.91	3.9	68.706
351	18:28:20	17.843	84.262	3.9	68.706
352	18:28:30	17.819	84.64	11.8	68.706
353	18:28:40	17.819	85.325	3.9	68.706
354	18:28:50	17.796	85.183	11.8	68.76
355	18:29:00	17.796	85.838	3.9	68.76
356	18:29:10	17.772	86.459	3.9	68.706
357	18:29:20	17.748	85.936	3.9	68.706
358	18:29:30	17.748	85.745	3.9	68.706
359	18:29:40	17.724	86.284	11.8	68.706
360	18:29:50	17.724	85.685	11.8	68.706		Temp-av	temp-std	RH-av	Rh-std	Intensity, Lux-av	Int-std		interval
361	18:30:00	17.701	85.379	11.8	68.706	NGKL	17.0731	0.825329	87.2689	1.67005	5.38934	3.09416	4/29/2017	18:30-19:30
362	18:30:10	17.701	84.695	3.9	68.76	NGKL
363	18:30:20	17.677	84.909	3.9	68.706	NGKL
364	18:30:30	17.677	85.647	3.9	68.76	NGKL
365	18:30:40	17.677	86.545	11.8	68.76	NGKL
366	18:30:50	17.653	86.268	11.8	68.706	NGKL
367	18:31:00	17.629	86.017	3.9	68.76	NGKL
368	18:31:10	17.629	86.453	3.9	68.813	NGKL
369	18:31:20	17.629	85.69	3.9	68.813	NGKL
370	18:31:30	17.629	85.144	3.9	68.813	NGKL
371	18:31:40	17.629	84.871	11.8	68.813	NGKL
372	18:31:50	17.605	85.029	3.9	68.813	NGKL
373	18:32:00	17.605	84.865	3.9	68.813	NGKL
374	18:32:10	17.582	85.024	3.9	68.813	NGKL
375	18:32:20	17.582	84.531	3.9	68.813	NGKL
376	18:32:30	17.582	85.87	3.9	68.813	NGKL
377	18:32:40	17.558	85.374	3.9	68.813	NGKL
378	18:32:50	17.558	85.837	3.9	68.813	NGKL
379	18:33:00	17.558	86.164	3.9	68.813	NGKL
380	18:33:10	17.558	86.409	3.9	68.813	NGKL
381	18:33:20	17.534	86.81	3.9	68.867	NGKL
382	18:33:30	17.534	86.675	3.9	68.921	NGKL
383	18:33:40	17.534	85.886	3.9	68.921	NGKL
384	18:33:50	17.51	85.581	3.9	68.921	NGKL
385	18:34:00	17.51	86.098	11.8	68.921	NGKL
386	18:34:10	17.51	85.99	3.9	68.975	NGKL
387	18:34:20	17.486	85.303	3.9	68.975	NGKL
388	18:34:30	17.486	85.548	3.9	69.028	NGKL
389	18:34:40	17.463	84.833	3.9	69.082	NGKL
390	18:34:50	17.463	84.641	3.9	69.082	NGKL
391	18:35:00	17.463	85.87	3.9	69.137	NGKL
392	18:35:10	17.439	85.973	3.9	69.191	NGKL
393	18:35:20	17.439	86.082	3.9	69.245	NGKL
394	18:35:30	17.415	85.967	3.9	69.354	NGKL
395	18:35:40	17.415	86.484	3.9	69.408	NGKL
396	18:35:50	17.415	86.565	3.9	69.463	NGKL
397	18:36:00	17.391	86.261	3.9	69.572	NGKL
398	18:36:10	17.391	85.744	11.8	69.572	NGKL
399	18:36:20	17.391	86.071	11.8	69.572	NGKL
400	18:36:30	17.368	85.956	3.9	69.572	NGKL
401	18:36:40	17.368	86.527	3.9	69.572	NGKL
402	18:36:50	17.344	86.223	3.9	69.572	NGKL
403	18:37:00	17.344	86.005	3.9	69.572	NGKL
404	18:37:10	17.344	86.168	3.9	69.572	NGKL
405	18:37:20	17.32	85.755	3.9	69.572	NGKL
406	18:37:30	17.32	85.673	3.9	69.572	NGKL
407	18:37:40	17.296	86.212	3.9	69.572	NGKL
408	18:37:50	17.296	86.7	11.8	69.572	NGKL
409	18:38:00	17.296	86.809	3.9	69.572	NGKL
410	18:38:10	17.272	86.613	3.9	69.627	NGKL
411	18:38:20	17.272	87.29	3.9	69.682	NGKL
412	18:38:30	17.249	87.609	11.8	69.792	NGKL
413	18:38:40	17.249	87.014	11.8	69.902	NGKL
414	18:38:50	17.225	86.981	3.9	69.957	NGKL
415	18:39:00	17.249	87.825	3.9	70.012	NGKL
416	18:39:10	17.249	88.202	11.8	70.123	NGKL
417	18:39:20	17.225	88.25	3.9	70.235	NGKL
418	18:39:30	17.225	87.522	11.8	70.346	NGKL
419	18:39:40	17.225	87.549	3.9	70.458	NGKL
420	18:39:50	17.201	87.327	3.9	70.458	NGKL
421	18:40:00	17.201	86.298	3.9	70.458	NGKL
422	18:40:10	17.201	86.081	3.9	70.458	NGKL
423	18:40:20	17.177	86.347	3.9	70.458	NGKL
424	18:40:30	17.177	85.994	3.9	70.458	NGKL
425	18:40:40	17.177	86.347	3.9	70.458	NGKL
426	18:40:50	17.153	87.154	11.8	70.458	NGKL
427	18:41:00	17.153	86.91	3.9	70.458	NGKL
428	18:41:10	17.13	87.202	3.9	70.458	NGKL
429	18:41:20	17.13	87.608	11.8	70.458	NGKL
430	18:41:30	17.106	87.413	3.9	70.458	NGKL
431	18:41:40	17.106	86.71	3.9	70.458	NGKL
432	18:41:50	17.106	86.086	3.9	70.458	NGKL
433	18:42:00	17.106	85.95	3.9	70.458	NGKL
434	18:42:10	17.082	85.944	3.9	70.458	NGKL
435	18:42:20	17.082	86.704	3.9	70.458	NGKL
436	18:42:30	17.082	86.948	3.9	70.458	NGKL
437	18:42:40	17.082	86.975	3.9	70.458	NGKL
438	18:42:50	17.082	87.191	11.8	70.458	NGKL
439	18:43:00	17.058	87.321	3.9	70.458	NGKL
440	18:43:10	17.058	87.267	3.9	70.458	NGKL
441	18:43:20	17.034	85.797	3.9	70.458	NGKL
442	18:43:30	17.034	84.898	3.9	70.458	NGKL
443	18:43:40	17.034	84.461	3.9	70.402	NGKL
444	18:43:50	17.011	85.166	3.9	70.402	NGKL
445	18:44:00	17.011	85.601	3.9	70.402	NGKL
446	18:44:10	17.011	86.199	3.9	70.458	NGKL
447	18:44:20	17.011	86.877	3.9	70.458	NGKL
448	18:44:30	16.987	87.223	11.8	70.458	NGKL
449	18:44:40	16.987	87.115	3.9	70.402	NGKL
450	18:44:50	16.987	86.952	3.9	70.458	NGKL
451	18:45:00	16.963	86.839	3.9	70.458	NGKL
452	18:45:10	16.963	87.595	3.9	70.458	NGKL
453	18:45:20	16.963	87.595	3.9	70.458	NGKL
454	18:45:30	16.963	87.271	3.9	70.458	NGKL
455	18:45:40	16.963	87.163	3.9	70.458	NGKL
456	18:45:50	16.939	87.643	3.9	70.458	NGKL
457	18:46:00	16.939	87.994	11.8	70.458	NGKL
458	18:46:10	16.939	88.209	3.9	70.458	NGKL
459	18:46:20	16.939	89.202	3.9	70.458	NGKL
460	18:46:30	16.939	88.827	3.9	70.458	NGKL
461	18:46:40	16.939	87.859	3.9	70.458	NGKL
462	18:46:50	16.939	87.751	3.9	70.458	NGKL
463	18:47:00	16.915	87.26	3.9	70.458	NGKL
464	18:47:10	16.939	87.238	3.9	70.458	NGKL
465	18:47:20	16.915	86.719	3.9	70.458	NGKL
466	18:47:30	16.915	87.098	3.9	70.458	NGKL
467	18:47:40	16.915	87.179	3.9	70.458	NGKL
468	18:47:50	16.915	87.395	3.9	70.458	NGKL
469	18:48:00	16.915	87.745	3.9	70.458	NGKL
470	18:48:10	16.915	87.611	3.9	70.458	NGKL
471	18:48:20	16.915	87.772	3.9	70.458	NGKL
472	18:48:30	16.915	88.015	3.9	70.458	NGKL
473	18:48:40	16.892	87.955	3.9	70.458	NGKL
474	18:48:50	16.892	87.875	3.9	70.458	NGKL
475	18:49:00	16.892	87.2	3.9	70.458	NGKL
476	18:49:10	16.892	87.551	3.9	70.458	NGKL
477	18:49:20	16.868	86.274	3.9	70.458	NGKL
478	18:49:30	16.868	86.22	3.9	70.458	NGKL
479	18:49:40	16.868	86.518	3.9	70.458	NGKL
480	18:49:50	16.868	87.141	3.9	70.458	NGKL
481	18:50:00	16.868	86.708	11.8	70.458	NGKL
482	18:50:10	16.844	86.486	3.9	70.458	NGKL
483	18:50:20	16.844	86.404	3.9	70.458	NGKL
484	18:50:30	16.844	87.243	11.8	70.458	NGKL
485	18:50:40	16.844	87.486	3.9	70.458	NGKL
486	18:50:50	16.844	87.728	3.9	70.458	NGKL
487	18:51:00	16.82	88.1	3.9	70.458	NGKL
488	18:51:10	16.82	87.588	3.9	70.458	NGKL
489	18:51:20	16.82	87.561	3.9	70.458	NGKL
490	18:51:30	16.82	87.075	3.9	70.458	NGKL
491	18:51:40	16.796	87.663	3.9	70.458	NGKL
492	18:51:50	16.796	87.717	3.9	70.458	NGKL
493	18:52:00	16.796	87.663	3.9	70.458	NGKL
494	18:52:10	16.796	87.663	3.9	70.458	NGKL
495	18:52:20	16.773	86.74	3.9	70.458	NGKL
496	18:52:30	16.773	87.253	3.9	70.458	NGKL
497	18:52:40	16.773	87.415	3.9	70.458	NGKL
498	18:52:50	16.773	88.25	3.9	70.458	NGKL
499	18:53:00	16.773	88.142	11.8	70.458	NGKL
500	18:53:10	16.773	88.411	3.9	70.458	NGKL
501	18:53:20	16.749	88.163	3.9	70.458	NGKL
502	18:53:30	16.749	88.19	3.9	70.458	NGKL
503	18:53:40	16.749	87.706	3.9	70.458	NGKL
504	18:53:50	16.749	87.76	3.9	70.458	NGKL
505	18:54:00	16.749	87.787	3.9	70.458	NGKL
506	18:54:10	16.725	87.969	3.9	70.458	NGKL
507	18:54:20	16.725	88.211	11.8	70.458	NGKL
508	18:54:30	16.725	87.646	3.9	70.458	NGKL
509	18:54:40	16.725	87.942	11.8	70.458	NGKL
510	18:54:50	16.725	88.399	3.9	70.458	NGKL
511	18:55:00	16.725	88.721	3.9	70.458	NGKL
512	18:55:10	16.701	88.716	3.9	70.458	NGKL
513	18:55:20	16.701	88.823	3.9	70.458	NGKL
514	18:55:30	16.701	88.367	3.9	70.514	NGKL
515	18:55:40	16.701	87.964	11.8	70.458	NGKL
516	18:55:50	16.677	87.904	3.9	70.458	NGKL
517	18:56:00	16.677	87.257	3.9	70.458	NGKL
518	18:56:10	16.677	87.716	3.9	70.458	NGKL
519	18:56:20	16.677	88.28	11.8	70.458	NGKL
520	18:56:30	16.654	88.489	3.9	70.458	NGKL
521	18:56:40	16.654	87.845	3.9	70.458	NGKL
522	18:56:50	16.654	87.306	3.9	70.458	NGKL
523	18:57:00	16.654	87.252	3.9	70.458	NGKL
524	18:57:10	16.654	87.737	3.9	70.458	NGKL
525	18:57:20	16.654	87.952	3.9	70.458	NGKL
526	18:57:30	16.63	88.269	3.9	70.458	NGKL
527	18:57:40	16.63	88.457	3.9	70.458	NGKL
528	18:57:50	16.63	88.457	3.9	70.458	NGKL
529	18:58:00	16.63	87.973	3.9	70.458	NGKL
530	18:58:10	16.63	87.947	3.9	70.458	NGKL
531	18:58:20	16.63	88.376	3.9	70.458	NGKL
532	18:58:30	16.63	88.215	3.9	70.458	NGKL
533	18:58:40	16.606	88.666	3.9	70.458	NGKL
534	18:58:50	16.606	88.559	3.9	70.458	NGKL
535	18:59:00	16.606	87.51	3.9	70.458	NGKL
536	18:59:10	16.606	87.106	3.9	70.458	NGKL
537	18:59:20	16.606	87.429	3.9	70.458	NGKL
538	18:59:30	16.582	88.016	3.9	70.458	NGKL
539	18:59:40	16.582	87.666	3.9	70.458	NGKL
540	18:59:50	16.582	87.666	3.9	70.458	NGKL
541	19:00:00	16.582	87.774	3.9	70.458	NGKL
542	19:00:10	16.582	88.096	3.9	70.458	NGKL
543	19:00:20	16.582	87.747	3.9	70.458	NGKL
544	19:00:30	16.558	87.175	3.9	70.458	NGKL
545	19:00:40	16.558	86.959	3.9	70.458	NGKL
546	19:00:50	16.558	87.229	3.9	70.458	NGKL
547	19:01:00	16.558	87.714	3.9	70.458	NGKL
548	19:01:10	16.558	88.252	3.9	70.458	NGKL
549	19:01:20	16.558	88.654	11.8	70.458	NGKL
550	19:01:30	16.558	88.788	3.9	70.458	NGKL
551	19:01:40	16.558	89.43	3.9	70.458	NGKL
552	19:01:50	16.558	89.857	3.9	70.458	NGKL
553	19:02:00	16.558	89.43	3.9	70.458	NGKL
554	19:02:10	16.558	89.484	3.9	70.458	NGKL
555	19:02:20	16.558	89.884	3.9	70.458	NGKL
556	19:02:30	16.558	89.644	11.8	70.458	NGKL
557	19:02:40	16.558	89.403	3.9	70.514	NGKL
558	19:02:50	16.558	88.064	11.8	70.514	NGKL
559	19:03:00	16.558	86.689	3.9	70.458	NGKL
560	19:03:10	16.558	86.959	3.9	70.458	NGKL
561	19:03:20	16.558	88.413	3.9	70.458	NGKL
562	19:03:30	16.558	88.949	3.9	70.458	NGKL
563	19:03:40	16.558	88.842	3.9	70.458	NGKL
564	19:03:50	16.558	88.842	3.9	70.458	NGKL
565	19:04:00	16.558	87.903	11.8	70.458	NGKL
566	19:04:10	16.558	87.418	11.8	70.458	NGKL
567	19:04:20	16.558	86.959	3.9	70.458	NGKL
568	19:04:30	16.558	87.768	3.9	70.458	NGKL
569	19:04:40	16.558	88.332	11.8	70.458	NGKL
570	19:04:50	16.558	87.956	3.9	70.458	NGKL
571	19:05:00	16.558	87.983	3.9	70.458	NGKL
572	19:05:10	16.558	88.493	3.9	70.458	NGKL
573	19:05:20	16.558	88.842	3.9	70.458	NGKL
574	19:05:30	16.558	88.681	3.9	70.458	NGKL
575	19:05:40	16.558	88.252	3.9	70.458	NGKL
576	19:05:50	16.558	88.144	3.9	70.458	NGKL
577	19:06:00	16.558	88.171	11.8	70.458	NGKL
578	19:06:10	16.582	88.901	11.8	70.458	NGKL
579	19:06:20	16.582	89.383	11.8	70.514	NGKL
580	19:06:30	16.582	87.774	3.9	70.514	NGKL
581	19:06:40	16.582	87.612	11.8	70.514	NGKL
582	19:06:50	16.582	88.177	3.9	70.458	NGKL
583	19:07:00	16.558	87.822	11.8	70.458	NGKL
584	19:07:10	16.582	88.526	3.9	70.458	NGKL
585	19:07:20	16.582	88.096	11.8	70.514	NGKL
586	19:07:30	16.582	89.062	11.8	70.514	NGKL
587	19:07:40	16.582	89.543	3.9	70.514	NGKL
588	19:07:50	16.582	89.276	11.8	70.57	NGKL
589	19:08:00	16.582	88.794	3.9	70.57	NGKL
590	19:08:10	16.558	89.056	3.9	70.57	NGKL
591	19:08:20	16.582	89.142	3.9	70.626	NGKL
592	19:08:30	16.582	89.276	3.9	70.683	NGKL
593	19:08:40	16.558	89.216	3.9	70.683	NGKL
594	19:08:50	16.582	89.543	11.8	70.739	NGKL
595	19:09:00	16.558	88.627	3.9	70.739	NGKL
596	19:09:10	16.558	88.359	3.9	70.796	NGKL
597	19:09:20	16.558	88.225	3.9	70.796	NGKL
598	19:09:30	16.558	87.956	11.8	70.796	NGKL
599	19:09:40	16.558	87.849	3.9	70.796	NGKL
600	19:09:50	16.558	88.198	11.8	70.796	NGKL
601	19:10:00	16.558	88.306	3.9	70.796	NGKL
602	19:10:10	16.558	88.252	3.9	70.796	NGKL
603	19:10:20	16.534	87.735	11.8	70.796	NGKL
604	19:10:30	16.534	87.924	3.9	70.739	NGKL
605	19:10:40	16.534	88.407	3.9	70.739	NGKL
606	19:10:50	16.534	88.782	3.9	70.739	NGKL
607	19:11:00	16.534	88.649	3.9	70.739	NGKL
608	19:11:10	16.534	89.05	3.9	70.796	NGKL
609	19:11:20	16.534	88.943	3.9	70.852	NGKL
610	19:11:30	16.534	89.077	3.9	70.909	NGKL
611	19:11:40	16.534	89.05	3.9	70.966	NGKL
612	19:11:50	16.534	89.237	11.8	71.022	NGKL
613	19:12:00	16.534	89.638	11.8	71.136	NGKL
614	19:12:10	16.534	89.905	3.9	71.193	NGKL
615	19:12:20	16.534	89.798	3.9	71.308	NGKL
616	19:12:30	16.534	89.958	3.9	71.423	NGKL
617	19:12:40	16.534	89.424	11.8	71.538	NGKL
618	19:12:50	16.534	88.89	3.9	71.538	NGKL
619	19:13:00	16.534	88.246	11.8	71.595	NGKL
620	19:13:10	16.534	87.251	3.9	71.595	NGKL
621	19:13:20	16.534	87.466	3.9	71.538	NGKL
622	19:13:30	16.534	87.224	3.9	71.48	NGKL
623	19:13:40	16.534	87.439	3.9	71.423	NGKL
624	19:13:50	16.511	86.786	3.9	71.365	NGKL
625	19:14:00	16.511	87.218	3.9	71.365	NGKL
626	19:14:10	16.511	88.428	11.8	71.365	NGKL
627	19:14:20	16.511	88.509	3.9	71.365	NGKL
628	19:14:30	16.511	88.401	3.9	71.365	NGKL
629	19:14:40	16.511	88.455	11.8	71.365	NGKL
630	19:14:50	16.511	87.568	3.9	71.365	NGKL
631	19:15:00	16.511	88.214	3.9	71.365	NGKL
632	19:15:10	16.487	88.288	3.9	71.365	NGKL
633	19:15:20	16.487	87.697	3.9	71.365	NGKL
634	19:15:30	16.487	87.805	3.9	71.365	NGKL
635	19:15:40	16.487	87.939	3.9	71.365	NGKL
636	19:15:50	16.487	87.859	11.8	71.365	NGKL
637	19:16:00	16.487	88.503	3.9	71.365	NGKL
638	19:16:10	16.487	88.61	3.9	71.365	NGKL
639	19:16:20	16.487	88.154	11.8	71.365	NGKL
640	19:16:30	16.487	88.342	3.9	71.365	NGKL
641	19:16:40	16.463	88.444	3.9	71.365	NGKL
642	19:16:50	16.463	88.712	3.9	71.365	NGKL
643	19:17:00	16.463	88.336	3.9	71.365	NGKL
644	19:17:10	16.463	88.417	11.8	71.365	NGKL
645	19:17:20	16.439	88.008	3.9	71.365	NGKL
646	19:17:30	16.439	87.524	3.9	71.365	NGKL
647	19:17:40	16.439	87.847	3.9	71.365	NGKL
648	19:17:50	16.439	87.982	11.8	71.365	NGKL
649	19:18:00	16.439	88.304	3.9	71.365	NGKL
650	19:18:10	16.439	88.062	11.8	71.365	NGKL
651	19:18:20	16.439	88.384	3.9	71.365	NGKL
652	19:18:30	16.439	87.632	3.9	71.365	NGKL
653	19:18:40	16.415	87.68	3.9	71.365	NGKL
654	19:18:50	16.415	87.895	3.9	71.365	NGKL
655	19:19:00	16.415	88.218	3.9	71.365	NGKL
656	19:19:10	16.415	88.754	3.9	71.365	NGKL
657	19:19:20	16.415	89.021	3.9	71.365	NGKL
658	19:19:30	16.415	88.754	3.9	71.423	NGKL
659	19:19:40	16.415	88.888	3.9	71.423	NGKL
660	19:19:50	16.392	87.028	3.9	71.365	NGKL
661	19:20:00	16.392	86.488	3.9	71.365	NGKL
662	19:20:10	16.392	87.378	3.9	71.365	NGKL
663	19:20:20	16.392	87.809	3.9	71.365	NGKL
664	19:20:30	16.392	88.319	3.9	71.365	NGKL
665	19:20:40	16.392	87.836	3.9	71.365	NGKL
666	19:20:50	16.392	88.319	11.8	71.365	NGKL
667	19:21:00	16.368	88.689	3.9	71.365	NGKL
668	19:21:10	16.368	88.769	11.8	71.365	NGKL
669	19:21:20	16.368	88.582	3.9	71.423	NGKL
670	19:21:30	16.368	88.126	3.9	71.365	NGKL
671	19:21:40	16.344	88.039	3.9	71.365	NGKL
672	19:21:50	16.344	88.361	3.9	71.365	NGKL
673	19:22:00	16.344	88.469	3.9	71.365	NGKL
674	19:22:10	16.344	87.986	11.8	71.365	NGKL
675	19:22:20	16.344	88.093	11.8	71.365	NGKL
676	19:22:30	16.344	88.066	3.9	71.365	NGKL
677	19:22:40	16.32	88.034	3.9	71.365	NGKL
678	19:22:50	16.32	88.838	3.9	71.365	NGKL
679	19:23:00	16.32	88.57	3.9	71.423	NGKL
680	19:23:10	16.32	88.838	3.9	71.365	NGKL
681	19:23:20	16.463	90.366	11.8	71.538	NGKL
682	19:23:30	16.582	89.65	3.9	71.711	NGKL
683	19:23:40	16.868	88.326	11.8	72.002	NGKL
684	19:23:50	17.13	90.131	11.8	72.295	NGKL
685	19:24:00	17.415	90.734	3.9	72.888	NGKL
686	19:24:10	17.677	90.612	3.9	73.369	NGKL
687	19:24:20	17.915	90.136	3.9	73.795	NGKL
688	19:24:30	18.105	89.511	3.9	74.226	NGKL
689	19:24:40	18.271	88.879	3.9	74.474	NGKL
690	19:24:50	18.414	88.319	3.9	74.537	NGKL
691	19:25:00	18.533	87.751	11.8	74.599	NGKL
692	19:25:10	18.628	87.285	3.9	74.599	NGKL
693	19:25:20	18.723	86.817	3.9	74.537	NGKL
694	19:25:30	18.818	86.349	3.9	74.474	NGKL
695	19:25:40	18.889	85.982	3.9	74.288	NGKL
696	19:25:50	18.961	85.643	11.8	74.226	NGKL
697	19:26:00	19.008	85.297	3.9	74.164	NGKL
698	19:26:10	19.056	85.06	3.9	74.102	NGKL
699	19:26:20	19.103	84.851	3.9	74.041	NGKL
700	19:26:30	19.127	84.636	3.9	73.979	NGKL
701	19:26:40	19.151	84.449	11.8	73.856	NGKL
702	19:26:50	19.199	84.294	11.8	73.734	NGKL
703	19:27:00	19.222	84.134	3.9	73.551	NGKL
704	19:27:10	19.246	84.001	3.9	73.429	NGKL
705	19:27:20	19.27	83.868	3.9	73.248	NGKL
706	19:27:30	19.294	83.763	3.9	73.127	NGKL
707	19:27:40	19.318	83.658	3.9	73.007	NGKL
708	19:27:50	19.341	83.552	3.9	72.828	NGKL
709	19:28:00	19.341	83.469	3.9	72.709	NGKL
710	19:28:10	19.365	83.391	11.8	72.531	NGKL
711	19:28:20	19.389	83.286	3.9	72.354	NGKL
712	19:28:30	19.389	83.147	3.9	72.236	NGKL
713	19:28:40	19.413	83.013	3.9	72.06	NGKL
714	19:28:50	19.436	82.88	11.8	71.885	NGKL
715	19:29:00	19.436	82.991	3.9	71.827	NGKL
716	19:29:10	19.484	82.974	3.9	71.711	NGKL
717	19:29:20	19.508	82.868	3.9	71.595	NGKL
718	19:29:30	19.532	82.762	3.9	71.48	NGKL
719	19:29:40	19.555	82.6	3.9	71.365	NGKL
720	19:29:50	19.555	82.433	11.8	71.251	NGKL
721	19:30:00	19.579	82.271	3.9	71.136	NGKL
722	19:30:10	19.579	82.076	11.8	71.022	NGKL
723	19:30:20	19.579	81.965	3.9	70.909	NGKL
724	19:30:30	19.603	81.858	3.9	70.796	NGKL
725	19:30:40	19.603	81.746	3.9	70.683	NGKL
726	19:30:50	19.579	81.63	11.8	70.514	NGKL
727	19:31:00	19.579	81.546	3.9	70.402
728	19:31:10	19.579	81.434	11.8	70.346
729	19:31:20	19.579	81.378	11.8	70.346
730	19:31:30	19.555	81.317	3.9	70.346
731	19:31:40	19.555	81.233	3.9	70.346
732	19:31:50	19.532	81.144	3.9	70.29
733	19:32:00	19.532	81.06	11.8	70.235
734	19:32:10	19.508	81.027	11.8	70.235
735	19:32:20	19.508	80.971	3.9	70.179
736	19:32:30	19.508	80.971	3.9	70.123
737	19:32:40	19.484	80.909	3.9	70.123
738	19:32:50	19.484	80.881	3.9	70.012
739	19:33:00	19.46	80.848	3.9	70.012
740	19:33:10	19.436	80.787	3.9	69.902
741	19:33:20	19.436	80.787	3.9	69.847
742	19:33:30	19.436	80.759	3.9	69.737
743	19:33:40	19.413	80.726	3.9	69.682
744	19:33:50	19.389	80.693	3.9	69.572
745	19:34:00	19.389	80.665	3.9	69.517
746	19:34:10	19.389	80.665	3.9	69.463
747	19:34:20	19.365	80.575	3.9	69.463
748	19:34:30	19.365	80.575	3.9	69.408
749	19:34:40	19.341	80.542	3.9	69.408
750	19:34:50	19.318	80.509	11.8	69.354
751	19:35:00	19.318	80.481	3.9	69.354
752	19:35:10	19.294	80.448	3.9	69.299
753	19:35:20	19.27	80.415	3.9	69.299
754	19:35:30	19.27	80.386	3.9	69.245
755	19:35:40	19.246	80.409	11.8	69.191
756	19:35:50	19.246	80.409	3.9	69.137
757	19:36:00	19.222	80.432	11.8	69.137
758	19:36:10	19.222	80.432	3.9	69.028
759	19:36:20	19.199	80.427	11.8	68.921
760	19:36:30	19.199	80.399	3.9	68.813
761	19:36:40	19.175	80.394	3.9	68.76
762	19:36:50	19.175	80.338	11.8	68.706
763	19:37:00	19.151	80.277	3.9	68.706
764	19:37:10	19.151	80.221	3.9	68.706
765	19:37:20	19.127	80.187	3.9	68.706
766	19:37:30	19.127	80.103	11.8	68.706
767	19:37:40	19.103	80.07	11.8	68.653
768	19:37:50	19.103	80.07	3.9	68.706
769	19:38:00	19.08	80.065	3.9	68.653
770	19:38:10	19.08	80.065	3.9	68.706
771	19:38:20	19.056	80.032	11.8	68.706
772	19:38:30	19.056	80.032	3.9	68.706
773	19:38:40	19.032	80.027	3.9	68.706
774	19:38:50	19.032	80.027	3.9	68.706
775	19:39:00	19.008	80.022	3.9	68.706
776	19:39:10	19.008	80.022	3.9	68.706
777	19:39:20	19.008	80.022	3.9	68.706
778	19:39:30	18.985	80.017	3.9	68.706
779	19:39:40	18.985	80.017	3.9	68.706
780	19:39:50	18.985	79.988	3.9	68.653
781	19:40:00	18.961	79.955	3.9	68.706
782	19:40:10	18.961	79.983	3.9	68.706
783	19:40:20	18.961	79.955	3.9	68.706
784	19:40:30	18.961	79.955	11.8	68.706
785	19:40:40	18.937	79.95	3.9	68.706
786	19:40:50	18.937	79.95	3.9	68.706
787	19:41:00	18.913	79.945	3.9	68.706
788	19:41:10	18.913	79.917	3.9	68.706
789	19:41:20	18.913	79.917	3.9	68.706
790	19:41:30	18.913	79.889	11.8	68.653
791	19:41:40	18.913	79.889	3.9	68.706
792	19:41:50	18.889	79.884	3.9	68.706
793	19:42:00	18.889	79.884	3.9	68.706
794	19:42:10	18.889	79.828	3.9	68.653
795	19:42:20	18.889	79.8	3.9	68.706
796	19:42:30	18.889	79.772	11.8	68.706
797	19:42:40	18.866	79.766	11.8	68.706
798	19:42:50	18.866	79.738	11.8	68.653
799	19:43:00	18.866	79.71	3.9	68.706
800	19:43:10	18.842	79.677	3.9	68.706
801	19:43:20	18.842	79.649	3.9	68.653
802	19:43:30	18.889	81.674	11.8	68.653
803	19:43:40	18.985	82.085	11.8	68.653
804	19:43:50	19.056	81.236	3.9	68.76
805	19:44:00	19.103	80.743	3.9	68.706
806	19:44:10	19.175	80.394	3.9	68.706
807	19:44:20	19.199	80.09	3.9	68.706
808	19:44:30	19.246	79.848	3.9	68.706
809	19:44:40	19.27	79.684	11.8	68.706
810	19:44:50	19.294	79.549	3.9	68.653
811	19:45:00	19.318	79.413	3.9	68.653
812	19:45:10	19.318	79.3	3.9	68.653
813	19:45:20	19.341	79.192	3.9	68.653
814	19:45:30	19.341	79.08	3.9	68.653
815	19:45:40	19.341	79.023	3.9	68.706
816	19:45:50	19.341	78.91	3.9	68.653
817	19:46:00	19.341	78.854	3.9	68.653
818	19:46:10	19.365	78.802	11.8	68.706
819	19:46:20	19.341	78.769	3.9	68.706
820	19:46:30	19.341	78.713	11.8	68.706
821	19:46:40	19.341	78.656	3.9	68.653
822	19:46:50	19.341	78.628	3.9	68.706
823	19:47:00	19.341	78.571	3.9	68.706
824	19:47:10	19.341	78.515	3.9	68.706
825	19:47:20	19.341	78.486	3.9	68.706
826	19:47:30	19.341	78.43	11.8	68.706
827	19:47:40	19.341	78.402	3.9	68.706
828	19:47:50	19.341	78.345	3.9	68.653
829	19:48:00	19.341	78.288	3.9	68.706
830	19:48:10	19.341	78.232	3.9	68.706
831	19:48:20	19.341	78.204	11.8	68.653
832	19:48:30	19.318	78.199	3.9	68.706
833	19:48:40	19.341	78.204	11.8	68.706
834	19:48:50	19.341	78.232	11.8	68.653
835	19:49:00	19.341	78.26	3.9	68.706
836	19:49:10	19.341	78.288	3.9	68.706
837	19:49:20	19.341	78.288	3.9	68.653
838	19:49:30	19.365	78.265	11.8	68.706
839	19:49:40	19.365	78.237	3.9	68.653
840	19:49:50	19.365	78.209	3.9	68.653
841	19:50:00	19.389	78.185	3.9	68.706
842	19:50:10	19.389	78.129	3.9	68.653
843	19:50:20	19.389	78.1	3.9	68.653
844	19:50:30	19.389	78.015	11.8	68.706
845	19:50:40	19.389	77.93	11.8	68.706
846	19:50:50	19.389	77.902	3.9	68.706
847	19:51:00	19.389	77.902	3.9	68.653
848	19:51:10	19.389	77.902	3.9	68.706
849	19:51:20	19.413	77.85	3.9	68.706
850	19:51:30	19.413	77.822	3.9	68.706
851	19:51:40	19.413	77.793	11.8	68.706
852	19:51:50	19.413	77.737	3.9	68.706
853	19:52:00	19.413	77.708	11.8	68.706
854	19:52:10	19.436	77.685	3.9	68.653
855	19:52:20	19.436	77.628	3.9	68.706
856	19:52:30	19.436	77.6	3.9	68.706
857	19:52:40	19.436	77.571	3.9	68.653
858	19:52:50	19.436	77.543	3.9	68.706
859	19:53:00	19.436	77.486	3.9	68.706
860	19:53:10	19.436	77.458	3.9	68.706
861	19:53:20	19.436	77.429	3.9	68.706
862	19:53:30	19.436	77.373	11.8	68.706
863	19:53:40	19.436	77.344	3.9	68.706
864	19:53:50	19.436	77.287	3.9	68.706
865	19:54:00	19.436	77.259	3.9	68.706
866	19:54:10	19.436	77.23	3.9	68.653
867	19:54:20	19.436	77.202	3.9	68.706
868	19:54:30	19.436	77.145	3.9	68.706
869	19:54:40	19.436	77.117	3.9	68.706
870	19:54:50	19.436	77.088	3.9	68.706
871	19:55:00	19.436	77.06	3.9	68.653
872	19:55:10	19.436	77.003	3.9	68.706
873	19:55:20	19.436	76.946	3.9	68.706
874	19:55:30	19.436	76.946	3.9	68.706
875	19:55:40	19.436	76.889	3.9	68.706
876	19:55:50	19.436	76.861	3.9	68.706
877	19:56:00	19.436	76.804	3.9	68.706
878	19:56:10	19.436	76.775	11.8	68.706
879	19:56:20	19.436	76.747	11.8	68.706
880	19:56:30	19.436	76.718	3.9	68.706
881	19:56:40	19.436	76.69	3.9	68.706
882	19:56:50	19.413	76.656	3.9	68.706
883	19:57:00	19.413	76.656	3.9	68.706
884	19:57:10	19.413	76.656	11.8	68.706
885	19:57:20	19.413	76.656	3.9	68.653
886	19:57:30	19.413	76.685	3.9	68.706
887	19:57:40	19.436	76.718	3.9	68.706
888	19:57:50	19.436	76.747	3.9	68.706
889	19:58:00	19.436	76.775	11.8	68.706
890	19:58:10	19.46	76.809	3.9	68.706
891	19:58:20	19.46	76.809	3.9	68.706
892	19:58:30	19.484	76.813	3.9	68.706
893	19:58:40	19.484	76.785	3.9	68.706
894	19:58:50	19.484	76.728	3.9	68.706
895	19:59:00	19.508	76.676	3.9	68.706
896	19:59:10	19.508	76.619	11.8	68.706
897	19:59:20	19.508	76.562	3.9	68.706
898	19:59:30	19.508	76.505	3.9	68.706
899	19:59:40	19.508	76.448	3.9	68.706
900	19:59:50	19.508	76.391	3.9	68.706
901	20:00:00	19.508	76.334	3.9	68.653
902	20:00:10	19.508	76.277	3.9	68.653
903	20:00:20	19.508	76.219	3.9	68.706
904	20:00:30	19.508	76.162	3.9	68.653
905	20:00:40	19.484	76.072	3.9	68.706
906	20:00:50	19.484	76.015	3.9	68.653
907	20:01:00	19.484	75.958	11.8	68.706
908	20:01:10	19.46	75.924	11.8	68.706
909	20:01:20	19.46	75.896	3.9	68.706
910	20:01:30	19.46	75.838	3.9	68.706
911	20:01:40	19.436	75.805	11.8	68.706
912	20:01:50	19.436	75.805	3.9	68.706
913	20:02:00	19.413	75.772	3.9	68.706
914	20:02:10	19.413	75.772	3.9	68.706
915	20:02:20	19.413	75.743	3.9	68.706
916	20:02:30	19.389	75.738	3.9	68.706
917	20:02:40	19.389	75.738	3.9	68.706
918	20:02:50	19.389	75.738	3.9	68.706
919	20:03:00	19.389	75.738	11.8	68.706
920	20:03:10	19.365	75.733	3.9	68.706
921	20:03:20	19.365	75.705	3.9	68.706
922	20:03:30	19.365	75.705	3.9	68.706
923	20:03:40	19.365	75.705	3.9	68.706
924	20:03:50	19.365	75.676	3.9	68.706
925	20:04:00	19.341	75.671	3.9	68.706
926	20:04:10	19.341	75.671	3.9	68.706
927	20:04:20	19.341	75.7	11.8	68.706
928	20:04:30	19.341	75.671	3.9	68.653
929	20:04:40	19.341	75.7	3.9	68.706
930	20:04:50	19.341	75.729	3.9	68.706
931	20:05:00	19.341	75.7	3.9	68.706
932	20:05:10	19.341	75.7	3.9	68.706
933	20:05:20	19.341	75.7	3.9	68.706
934	20:05:30	19.341	75.7	3.9	68.706
935	20:05:40	19.341	75.7	3.9	68.706
936	20:05:50	19.365	75.676	3.9	68.706
937	20:06:00	19.341	75.671	3.9	68.706
938	20:06:10	19.341	75.671	11.8	68.706
939	20:06:20	19.365	75.648	11.8	68.706
940	20:06:30	19.365	75.648	3.9	68.706
941	20:06:40	19.365	75.619	3.9	68.706
942	20:06:50	19.365	75.619	3.9	68.706
943	20:07:00	19.365	75.619	11.8	68.706
944	20:07:10	19.365	75.619	3.9	68.706
945	20:07:20	19.389	75.567	3.9	68.706
946	20:07:30	19.389	75.567	3.9	68.706
947	20:07:40	19.389	75.567	11.8	68.706
948	20:07:50	19.389	75.538	3.9	68.706
949	20:08:00	19.389	75.538	3.9	68.653
950	20:08:10	19.413	75.514	3.9	68.706
951	20:08:20	19.413	75.514	3.9	68.706
952	20:08:30	19.413	75.486	3.9	68.706
953	20:08:40	19.413	75.457	3.9	68.706
954	20:08:50	19.436	75.462	3.9	68.706
955	20:09:00	19.436	75.433	3.9	68.706
956	20:09:10	19.436	75.405	3.9	68.706
957	20:09:20	19.436	75.405	3.9	68.706
958	20:09:30	19.436	75.347	3.9	68.706
959	20:09:40	19.436	75.347	3.9	68.706
960	20:09:50	19.46	75.323	3.9	68.706
961	20:10:00	19.436	75.29	3.9	68.706
962	20:10:10	19.46	75.266	11.8	68.706
963	20:10:20	19.46	75.266	3.9	68.706
964	20:10:30	19.46	75.237	3.9	68.706
965	20:10:40	19.46	75.237	3.9	68.706
966	20:10:50	19.484	75.214	3.9	68.706
967	20:11:00	19.484	75.156	11.8	68.706
968	20:11:10	19.484	75.128	3.9	68.653
969	20:11:20	19.484	75.099	3.9	68.706
970	20:11:30	19.484	75.07	3.9	68.706
971	20:11:40	19.484	75.07	3.9	68.706
972	20:11:50	19.484	75.042	11.8	68.706
973	20:12:00	19.508	75.046	3.9	68.706
974	20:12:10	19.508	75.046	3.9	68.706
975	20:12:20	19.508	75.046	3.9	68.706
976	20:12:30	19.508	75.046	3.9	68.706
977	20:12:40	19.508	75.018	3.9	68.706
978	20:12:50	19.508	75.018	3.9	68.706
979	20:13:00	19.508	75.018	3.9	68.706
980	20:13:10	19.532	75.022	3.9	68.706
981	20:13:20	19.532	74.994	11.8	68.706
982	20:13:30	19.508	74.96	3.9	68.706
983	20:13:40	19.532	74.965	11.8	68.706
984	20:13:50	19.532	74.965	3.9	68.706
985	20:14:00	19.532	74.965	3.9	68.706
986	20:14:10	19.532	74.965	3.9	68.706
987	20:14:20	19.532	74.908	3.9	68.706
988	20:14:30	19.532	74.908	3.9	68.706
989	20:14:40	19.532	74.908	3.9	68.706
990	20:14:50	19.532	74.85	3.9	68.706
991	20:15:00	19.532	74.85	3.9	68.706
992	20:15:10	19.532	74.822	3.9	68.706
993	20:15:20	19.532	74.793	3.9	68.706
994	20:15:30	19.532	74.735	3.9	68.706
995	20:15:40	19.532	74.707	3.9	68.706
996	20:15:50	19.532	74.678	3.9	68.706
997	20:16:00	19.532	74.649	3.9	68.706
998	20:16:10	19.532	74.621	3.9	68.706
999	20:16:20	19.508	74.587	3.9	68.706
1000	20:16:30	19.508	74.558	3.9	68.706
1001	20:16:40	19.508	74.53	3.9	68.706
1002	20:16:50	19.508	74.501	3.9	68.706
1003	20:17:00	19.508	74.472	3.9	68.706
1004	20:17:10	19.484	74.467	3.9	68.706
1005	20:17:20	19.484	74.439	3.9	68.706
1006	20:17:30	19.484	74.439	3.9	68.706
1007	20:17:40	19.484	74.439	3.9	68.706
1008	20:17:50	19.46	74.434	3.9	68.706
1009	20:18:00	19.46	74.434	3.9	68.706
1010	20:18:10	19.46	74.434	3.9	68.706
1011	20:18:20	19.46	74.434	3.9	68.706
1012	20:18:30	19.46	74.434	3.9	68.706
1013	20:18:40	19.46	74.434	3.9	68.706
1014	20:18:50	19.46	74.434	3.9	68.706
1015	20:19:00	19.46	74.434	3.9	68.706
1016	20:19:10	19.46	74.463	3.9	68.706
1017	20:19:20	19.46	74.491	3.9	68.706
1018	20:19:30	19.46	74.491	3.9	68.706
1019	20:19:40	19.484	74.496	3.9	68.706
1020	20:19:50	19.484	74.496	3.9	68.706
1021	20:20:00	19.484	74.467	3.9	68.706
1022	20:20:10	19.484	74.467	3.9	68.706
1023	20:20:20	19.484	74.467	11.8	68.706
1024	20:20:30	19.508	74.472	11.8	68.706
1025	20:20:40	19.508	74.472	3.9	68.706
1026	20:20:50	19.508	74.472	3.9	68.706
1027	20:21:00	19.508	74.472	3.9	68.706
1028	20:21:10	19.532	74.477	11.8	68.706
1029	20:21:20	19.532	74.506	3.9	68.706
1030	20:21:30	19.532	74.506	3.9	68.706
1031	20:21:40	19.555	74.51	11.8	68.706
1032	20:21:50	19.555	74.51	3.9	68.706
1033	20:22:00	19.579	74.515	3.9	68.706
1034	20:22:10	19.579	74.486	3.9	68.706
1035	20:22:20	19.579	74.515	3.9	68.706
1036	20:22:30	19.603	74.52	3.9	68.706
1037	20:22:40	19.627	74.524	3.9	68.706
1038	20:22:50	19.627	74.524	3.9	68.706
1039	20:23:00	19.627	74.496	3.9	68.706
1040	20:23:10	19.651	74.5	3.9	68.706
1041	20:23:20	19.674	74.476	3.9	68.706
1042	20:23:30	19.674	74.448	3.9	68.706
1043	20:23:40	19.674	74.448	3.9	68.706
1044	20:23:50	19.698	74.424	11.8	68.706
1045	20:24:00	19.698	74.366	3.9	68.706
1046	20:24:10	19.722	74.342	3.9	68.706
1047	20:24:20	19.722	74.313	3.9	68.706
1048	20:24:30	19.722	74.284	3.9	68.706
1049	20:24:40	19.746	74.26	3.9	68.706
1050	20:24:50	19.746	74.232	3.9	68.706
1051	20:25:00	19.746	74.174	11.8	68.706
1052	20:25:10	19.746	74.145	3.9	68.706
1053	20:25:20	19.77	74.121	3.9	68.706
1054	20:25:30	19.77	74.063	3.9	68.706
1055	20:25:40	19.77	74.006	3.9	68.706
1056	20:25:50	19.77	73.977	3.9	68.706
1057	20:26:00	19.77	73.948	11.8	68.706
1058	20:26:10	19.793	73.924	11.8	68.706
1059	20:26:20	19.793	73.895	11.8	68.706
1060	20:26:30	19.793	73.866	3.9	68.706
1061	20:26:40	19.793	73.809	3.9	68.706
1062	20:26:50	19.793	73.809	3.9	68.706
1063	20:27:00	19.793	73.78	3.9	68.706
1064	20:27:10	19.793	73.78	3.9	68.706
1065	20:27:20	19.793	73.751	3.9	68.706
1066	20:27:30	19.793	73.751	3.9	68.706
1067	20:27:40	19.793	73.693	3.9	68.706
1068	20:27:50	19.793	73.693	3.9	68.706
1069	20:28:00	19.817	73.669	3.9	68.706
1070	20:28:10	19.817	73.64	3.9	68.706
1071	20:28:20	19.817	73.64	3.9	68.706
1072	20:28:30	19.817	73.611	3.9	68.706
1073	20:28:40	19.817	73.582	3.9	68.706
1074	20:28:50	19.817	73.554	3.9	68.706
1075	20:29:00	19.817	73.554	3.9	68.706
1076	20:29:10	19.817	73.525	3.9	68.706
1077	20:29:20	19.817	73.525	3.9	68.706
1078	20:29:30	19.817	73.496	3.9	68.706
1079	20:29:40	19.817	73.467	11.8	68.706
1080	20:29:50	19.817	73.467	3.9	68.706
1081	20:30:00	19.817	73.438	3.9	68.706
1082	20:30:10	19.817	73.409	11.8	68.706
1083	20:30:20	19.817	73.409	3.9	68.706
1084	20:30:30	19.817	73.38	11.8	68.706
1085	20:30:40	19.817	73.351	3.9	68.706
1086	20:30:50	19.817	73.351	3.9	68.706
1087	20:31:00	19.817	73.322	3.9	68.706
1088	20:31:10	19.817	73.294	3.9	68.706
1089	20:31:20	19.817	73.294	11.8	68.706
1090	20:31:30	19.817	73.265	3.9	68.706
1091	20:31:40	19.841	73.24	3.9	68.706
1092	20:31:50	19.817	73.236	3.9	68.706
1093	20:32:00	19.817	73.149	3.9	68.706
1094	20:32:10	19.817	73.12	11.8	68.653
1095	20:32:20	19.817	73.178	3.9	68.706
1096	20:32:30	19.841	73.211	3.9	68.706
1097	20:32:40	19.841	73.183	3.9	68.706
1098	20:32:50	19.841	73.211	3.9	68.706
1099	20:33:00	19.841	73.183	3.9	68.706
1100	20:33:10	19.841	73.183	3.9	68.706
1101	20:33:20	19.841	73.154	3.9	68.706
1102	20:33:30	19.841	73.125	3.9	68.706
1103	20:33:40	19.841	73.125	3.9	68.706
1104	20:33:50	19.841	73.096	3.9	68.706
1105	20:34:00	19.841	73.096	3.9	68.706
1106	20:34:10	19.841	73.067	3.9	68.706
1107	20:34:20	19.841	73.067	3.9	68.706
1108	20:34:30	19.841	73.067	3.9	68.706
1109	20:34:40	19.841	73.067	3.9	68.706
1110	20:34:50	19.841	73.067	3.9	68.706
1111	20:35:00	19.841	73.038	3.9	68.706
1112	20:35:10	19.841	73.038	3.9	68.706
1113	20:35:20	19.865	73.043	3.9	68.706
1114	20:35:30	19.865	73.071	11.8	68.706
1115	20:35:40	19.865	73.043	11.8	68.706
1116	20:35:50	19.865	73.043	3.9	68.706
1117	20:36:00	19.888	73.047	3.9	68.706
1118	20:36:10	19.888	73.047	3.9	68.706
1119	20:36:20	19.888	73.047	11.8	68.706
1120	20:36:30	19.912	73.052	11.8	68.706
1121	20:36:40	19.912	73.081	11.8	68.706
1122	20:36:50	19.912	73.081	3.9	68.706
1123	20:37:00	19.936	73.085	3.9	68.706
1124	20:37:10	19.936	73.085	3.9	68.706
1125	20:37:20	19.96	73.119	3.9	68.706
1126	20:37:30	19.96	73.09	3.9	68.706
1127	20:37:40	19.984	73.095	11.8	68.706
1128	20:37:50	19.984	73.095	3.9	68.706
1129	20:38:00	20.007	73.07	3.9	68.706
1130	20:38:10	20.007	73.07	3.9	68.706
1131	20:38:20	20.031	73.046	3.9	68.706
1132	20:38:30	20.031	73.046	3.9	68.706
1133	20:38:40	20.055	73.051	11.8	68.706
1134	20:38:50	20.055	73.022	3.9	68.706
1135	20:39:00	20.079	73.026	3.9	68.706
1136	20:39:10	20.079	72.997	11.8	68.706
1137	20:39:20	20.103	73.002	11.8	68.706
1138	20:39:30	20.103	72.973	3.9	68.706
1139	20:39:40	20.103	72.944	3.9	68.706
1140	20:39:50	20.126	72.949	3.9	68.706
1141	20:40:00	20.126	72.92	3.9	68.706
1142	20:40:10	20.15	72.895	3.9	68.706
1143	20:40:20	20.174	72.9	3.9	68.706
1144	20:40:30	20.174	72.9	3.9	68.706
1145	20:40:40	20.198	72.875	3.9	68.706
1146	20:40:50	20.198	72.846	3.9	68.706
1147	20:41:00	20.198	72.846	3.9	68.706
1148	20:41:10	20.222	72.822	3.9	68.706
1149	20:41:20	20.222	72.822	3.9	68.706
1150	20:41:30	20.246	72.798	11.8	68.706
1151	20:41:40	20.246	72.769	3.9	68.706
1152	20:41:50	20.269	72.773	11.8	68.706
1153	20:42:00	20.269	72.744	3.9	68.706
1154	20:42:10	20.293	72.72	3.9	68.706
1155	20:42:20	20.293	72.691	3.9	68.706
1156	20:42:30	20.317	72.695	3.9	68.706
1157	20:42:40	20.317	72.695	11.8	68.706
1158	20:42:50	20.341	72.671	3.9	68.706
1159	20:43:00	20.341	72.642	3.9	68.706
1160	20:43:10	20.341	72.613	3.9	68.706
1161	20:43:20	20.365	72.618	11.8	68.706
1162	20:43:30	20.388	72.593	3.9	68.706
1163	20:43:40	20.388	72.564	3.9	68.653
1164	20:43:50	20.388	72.535	3.9	68.706
1165	20:44:00	20.412	72.54	3.9	68.706
1166	20:44:10	20.436	72.544	11.8	68.706
1167	20:44:20	20.436	72.515	3.9	68.706
1168	20:44:30	20.436	72.486	3.9	68.706
1169	20:44:40	20.46	72.491	11.8	68.706
1170	20:44:50	20.46	72.462	3.9	68.706
1171	20:45:00	20.484	72.466	3.9	68.706
1172	20:45:10	20.484	72.437	11.8	68.706
1173	20:45:20	20.484	72.437	11.8	68.706
1174	20:45:30	20.507	72.413	3.9	68.706
1175	20:45:40	20.507	72.442	3.9	68.706
1176	20:45:50	20.531	72.446	11.8	68.706
1177	20:46:00	20.531	72.417	3.9	68.706
1178	20:46:10	20.531	72.388	3.9	68.706
1179	20:46:20	20.555	72.364	3.9	68.706
1180	20:46:30	20.555	72.364	3.9	68.706
1181	20:46:40	20.555	72.335	3.9	68.706
1182	20:46:50	20.579	72.339	3.9	68.706
1183	20:47:00	20.579	72.31	3.9	68.706
1184	20:47:10	20.579	72.281	3.9	68.706
1185	20:47:20	20.579	72.281	11.8	68.706
1186	20:47:30	20.603	72.286	3.9	68.706
1187	20:47:40	20.603	72.256	3.9	68.706
1188	20:47:50	20.603	72.256	3.9	68.706
1189	20:48:00	20.627	72.232	3.9	68.706
1190	20:48:10	20.627	72.232	3.9	68.706
1191	20:48:20	20.627	72.232	3.9	68.706
1192	20:48:30	20.65	72.236	3.9	68.706
1193	20:48:40	20.65	72.236	3.9	68.706
1194	20:48:50	20.65	72.236	3.9	68.706
1195	20:49:00	20.674	72.212	3.9	68.706
1196	20:49:10	20.674	72.212	3.9	68.706
1197	20:49:20	20.674	72.183	3.9	68.706
1198	20:49:30	20.698	72.187	3.9	68.706
1199	20:49:40	20.698	72.158	3.9	68.706
1200	20:49:50	20.698	72.158	3.9	68.706
1201	20:50:00	20.698	72.129	3.9	68.706
1202	20:50:10	20.722	72.134	3.9	68.706
1203	20:50:20	20.722	72.134	11.8	68.706
1204	20:50:30	20.722	72.105	3.9	68.706
1205	20:50:40	20.746	72.109	11.8	68.706
1206	20:50:50	20.746	72.109	3.9	68.706
1207	20:51:00	20.746	72.138	3.9	68.706
1208	20:51:10	20.77	72.085	3.9	68.706
1209	20:51:20	20.77	72.085	3.9	68.706
1210	20:51:30	20.77	72.055	3.9	68.706
1211	20:51:40	20.77	72.055	3.9	68.706
1212	20:51:50	20.793	72.031	3.9	68.706
1213	20:52:00	20.793	72.031	3.9	68.706
1214	20:52:10	20.793	72.002	3.9	68.706
1215	20:52:20	20.793	72.002	11.8	68.706
1216	20:52:30	20.817	72.006	3.9	68.706
1217	20:52:40	20.817	72.006	3.9	68.706
1218	20:52:50	20.817	72.006	3.9	68.706
1219	20:53:00	20.841	71.982	3.9	68.706
1220	20:53:10	20.841	71.952	3.9	68.706
1221	20:53:20	20.841	71.952	3.9	68.706
1222	20:53:30	20.841	71.952	11.8	68.706
1223	20:53:40	20.865	71.957	3.9	68.706
1224	20:53:50	20.865	71.957	3.9	68.706
1225	20:54:00	20.865	71.957	3.9	68.706
1226	20:54:10	20.865	71.928	3.9	68.706
1227	20:54:20	20.865	71.928	3.9	68.706
1228	20:54:30	20.889	71.903	3.9	68.706
1229	20:54:40	20.889	71.932	11.8	68.706
1230	20:54:50	20.889	71.932	3.9	68.706
1231	20:55:00	20.913	71.908	3.9	68.706
1232	20:55:10	20.913	71.879	11.8	68.706
1233	20:55:20	20.913	71.849	11.8	68.706
1234	20:55:30	20.913	71.849	3.9	68.706
1235	20:55:40	20.936	71.825	3.9	68.706
1236	20:55:50	20.936	71.825	3.9	68.706
1237	20:56:00	20.936	71.825	3.9	68.706
1238	20:56:10	20.936	71.766	3.9	68.706
1239	20:56:20	20.96	71.771	3.9	68.706
1240	20:56:30	20.96	71.8	3.9	68.706
1241	20:56:40	20.96	71.771	3.9	68.706
1242	20:56:50	20.96	71.771	11.8	68.706
1243	20:57:00	20.96	71.742	3.9	68.706
1244	20:57:10	20.984	71.717	3.9	68.706
1245	20:57:20	20.984	71.717	3.9	68.706
1246	20:57:30	20.984	71.688	11.8	68.706
1247	20:57:40	20.984	71.688	3.9	68.706
1248	20:57:50	20.984	71.688	3.9	68.706
1249	20:58:00	21.008	71.663	11.8	68.706
1250	20:58:10	21.008	71.663	3.9	68.706
1251	20:58:20	21.008	71.663	3.9	68.706
1252	20:58:30	21.008	71.605	3.9	68.706
1253	20:58:40	21.032	71.639	3.9	68.706
1254	20:58:50	21.032	71.609	3.9	68.706
1255	20:59:00	21.032	71.58	11.8	68.706
1256	20:59:10	21.056	71.585	3.9	68.706
1257	20:59:20	21.032	71.58	3.9	68.706
1258	20:59:30	21.056	71.585	3.9	68.706
1259	20:59:40	21.056	71.555	3.9	68.706
1260	20:59:50	21.079	71.56	11.8	68.706
1261	21:00:00	21.079	71.56	11.8	68.706
1262	21:00:10	21.079	71.531	3.9	68.706
1263	21:00:20	21.079	71.531	3.9	68.706
1264	21:00:30	21.079	71.502	3.9	68.706
1265	21:00:40	21.079	71.502	11.8	68.706
1266	21:00:50	21.079	71.502	3.9	68.706
1267	21:01:00	21.103	71.477	3.9	68.706
1268	21:01:10	21.103	71.477	3.9	68.706
1269	21:01:20	21.103	71.448	11.8	68.706
1270	21:01:30	21.103	71.448	3.9	68.706
1271	21:01:40	21.127	71.452	3.9	68.706
1272	21:01:50	21.127	71.452	3.9	68.706
1273	21:02:00	21.127	71.423	3.9	68.706
1274	21:02:10	21.127	71.423	3.9	68.706
1275	21:02:20	21.127	71.394	3.9	68.706
1276	21:02:30	21.127	71.394	11.8	68.706
1277	21:02:40	21.151	71.398	3.9	68.706
1278	21:02:50	21.151	71.369	3.9	68.706
1279	21:03:00	21.151	71.369	3.9	68.706
1280	21:03:10	21.151	71.369	3.9	68.706
1281	21:03:20	21.151	71.34	11.8	68.706
1282	21:03:30	21.175	71.344	3.9	68.706
1283	21:03:40	21.175	71.315	3.9	68.706
1284	21:03:50	21.175	71.315	3.9	68.706
1285	21:04:00	21.175	71.286	3.9	68.706
1286	21:04:10	21.175	71.286	3.9	68.706
1287	21:04:20	21.175	71.286	3.9	68.706
1288	21:04:30	21.199	71.261	3.9	68.706
1289	21:04:40	21.199	71.261	3.9	68.706
1290	21:04:50	21.199	71.232	11.8	68.706
1291	21:05:00	21.199	71.232	3.9	68.706
1292	21:05:10	21.199	71.232	3.9	68.706
1293	21:05:20	21.199	71.232	11.8	68.706
1294	21:05:30	21.223	71.207	11.8	68.706
1295	21:05:40	21.223	71.207	3.9	68.706
1296	21:05:50	21.223	71.207	11.8	68.706
1297	21:06:00	21.223	71.178	3.9	68.706
1298	21:06:10	21.223	71.148	3.9	68.706
1299	21:06:20	21.223	71.148	11.8	68.706
1300	21:06:30	21.223	71.148	3.9	68.706
1301	21:06:40	21.246	71.153	11.8	68.706
1302	21:06:50	21.246	71.123	3.9	68.706
1303	21:07:00	21.246	71.094	3.9	68.706
1304	21:07:10	21.246	71.094	3.9	68.706
1305	21:07:20	21.246	71.094	11.8	68.706
1306	21:07:30	21.246	71.094	3.9	68.706
1307	21:07:40	21.27	71.069	11.8	68.706
1308	21:07:50	21.27	71.069	11.8	68.706
1309	21:08:00	21.27	71.069	3.9	68.706
1310	21:08:10	21.27	71.04	3.9	68.706
1311	21:08:20	21.27	71.011	11.8	68.706
1312	21:08:30	21.294	71.015	3.9	68.706
1313	21:08:40	21.294	71.015	3.9	68.706
1314	21:08:50	21.294	70.986	3.9	68.706
1315	21:09:00	21.294	71.015	11.8	68.706
1316	21:09:10	21.294	70.986	3.9	68.706
1317	21:09:20	21.294	70.957	3.9	68.706
1318	21:09:30	21.294	70.957	3.9	68.706
1319	21:09:40	21.294	70.957	11.8	68.706
1320	21:09:50	21.294	70.927	11.8	68.706
1321	21:10:00	21.318	70.932	11.8	68.706
1322	21:10:10	21.318	70.932	3.9	68.706
1323	21:10:20	21.318	70.903	3.9	68.706
1324	21:10:30	21.318	70.903	3.9	68.706
1325	21:10:40	21.318	70.903	3.9	68.706
1326	21:10:50	21.318	70.873	3.9	68.706
1327	21:11:00	21.318	70.873	3.9	68.706
1328	21:11:10	21.342	70.848	3.9	68.706
1329	21:11:20	21.342	70.848	3.9	68.706
1330	21:11:30	21.342	70.848	3.9	68.706
1331	21:11:40	21.342	70.819	3.9	68.706
1332	21:11:50	21.342	70.819	3.9	68.706
1333	21:12:00	21.342	70.79	3.9	68.706
1334	21:12:10	21.342	70.79	3.9	68.706
1335	21:12:20	21.342	70.79	3.9	68.706
1336	21:12:30	21.342	70.76	3.9	68.706
1337	21:12:40	21.366	70.765	3.9	68.706
1338	21:12:50	21.366	70.765	3.9	68.706
1339	21:13:00	21.366	70.735	3.9	68.706
1340	21:13:10	21.366	70.735	3.9	68.706
1341	21:13:20	21.366	70.706	11.8	68.706
1342	21:13:30	21.366	70.706	3.9	68.706
1343	21:13:40	21.366	70.706	3.9	68.706
1344	21:13:50	21.39	70.681	3.9	68.706
1345	21:14:00	21.39	70.711	3.9	68.706
1346	21:14:10	21.39	70.681	3.9	68.706
1347	21:14:20	21.39	70.681	3.9	68.706
1348	21:14:30	21.39	70.652	3.9	68.706
1349	21:14:40	21.39	70.652	3.9	68.706
1350	21:14:50	21.39	70.652	3.9	68.706
1351	21:15:00	21.39	70.623	3.9	68.706
1352	21:15:10	21.39	70.623	3.9	68.706
1353	21:15:20	21.413	70.598	3.9	68.706
1354	21:15:30	21.413	70.598	3.9	68.706
1355	21:15:40	21.413	70.598	3.9	68.76
1356	21:15:50	21.413	70.568	3.9	68.706
1357	21:16:00	21.413	70.568	3.9	68.706
1358	21:16:10	21.413	70.568	3.9	68.706
1359	21:16:20	21.413	70.539	11.8	68.706
1360	21:16:30	21.413	70.539	3.9	68.706
1361	21:16:40	21.413	70.539	3.9	68.706
1362	21:16:50	21.413	70.51	11.8	68.706
1363	21:17:00	21.413	70.51	3.9	68.706
1364	21:17:10	21.413	70.48	3.9	68.706
1365	21:17:20	21.437	70.455	3.9	68.706
1366	21:17:30	21.437	70.485	3.9	68.706
1367	21:17:40	21.437	70.455	3.9	68.706
1368	21:17:50	21.437	70.455	3.9	68.706
1369	21:18:00	21.437	70.455	3.9	68.706
1370	21:18:10	21.437	70.426	3.9	68.706
1371	21:18:20	21.437	70.426	3.9	68.706
1372	21:18:30	21.437	70.426	3.9	68.706
1373	21:18:40	21.437	70.426	3.9	68.706
1374	21:18:50	21.437	70.396	3.9	68.706
1375	21:19:00	21.461	70.401	3.9	68.706
1376	21:19:10	21.461	70.372	3.9	68.706
1377	21:19:20	21.461	70.372	11.8	68.706
1378	21:19:30	21.461	70.342	3.9	68.706
1379	21:19:40	21.461	70.372	3.9	68.706
1380	21:19:50	21.461	70.342	3.9	68.706
1381	21:20:00	21.461	70.342	3.9	68.706
1382	21:20:10	21.461	70.313	3.9	68.706
1383	21:20:20	21.461	70.313	3.9	68.706
1384	21:20:30	21.485	70.317	3.9	68.706
1385	21:20:40	21.485	70.288	3.9	68.706
1386	21:20:50	21.485	70.288	3.9	68.706
1387	21:21:00	21.485	70.288	3.9	68.706
1388	21:21:10	21.485	70.288	3.9	68.706
1389	21:21:20	21.485	70.258	3.9	68.706
1390	21:21:30	21.485	70.258	3.9	68.706
1391	21:21:40	21.485	70.258	3.9	68.706
1392	21:21:50	21.485	70.229	11.8	68.706
1393	21:22:00	21.485	70.229	3.9	68.706
1394	21:22:10	21.485	70.2	11.8	68.706
1395	21:22:20	21.485	70.229	3.9	68.706
1396	21:22:30	21.485	70.2	3.9	68.706
1397	21:22:40	21.485	70.2	3.9	68.706
1398	21:22:50	21.509	70.175	3.9	68.706
1399	21:23:00	21.509	70.175	3.9	68.706
1400	21:23:10	21.509	70.175	3.9	68.706
1401	21:23:20	21.509	70.175	3.9	68.706
1402	21:23:30	21.509	70.145	3.9	68.706
1403	21:23:40	21.509	70.116	11.8	68.706
1404	21:23:50	21.509	70.116	3.9	68.706
1405	21:24:00	21.509	70.116	3.9	68.706
1406	21:24:10	21.509	70.086	3.9	68.706
1407	21:24:20	21.533	70.091	3.9	68.706
1408	21:24:30	21.533	70.091	11.8	68.706
1409	21:24:40	21.533	70.061	11.8	68.706
1410	21:24:50	21.533	70.061	3.9	68.706
1411	21:25:00	21.533	70.032	11.8	68.706
1412	21:25:10	21.533	70.061	3.9	68.706
1413	21:25:20	21.533	70.032	11.8	68.706
1414	21:25:30	21.533	70.032	11.8	68.706
1415	21:25:40	21.533	70.032	3.9	68.706
1416	21:25:50	21.533	70.002	11.8	68.706
1417	21:26:00	21.533	70.002	3.9	68.706
1418	21:26:10	21.533	70.002	3.9	68.706
1419	21:26:20	21.533	70.002	11.8	68.706
1420	21:26:30	21.533	69.973	11.8	68.706
1421	21:26:40	21.557	69.977	3.9	68.706
1422	21:26:50	21.557	69.977	11.8	68.706
1423	21:27:00	21.557	69.977	11.8	68.706
1424	21:27:10	21.557	69.948	3.9	68.706
1425	21:27:20	21.557	69.948	3.9	68.706
1426	21:27:30	21.557	69.948	3.9	68.706
1427	21:27:40	21.557	69.919	11.8	68.706
1428	21:27:50	21.557	69.919	3.9	68.706
1429	21:28:00	21.557	69.919	11.8	68.706
1430	21:28:10	21.581	69.923	11.8	68.706
1431	21:28:20	21.557	69.889	3.9	68.706
1432	21:28:30	21.581	69.894	11.8	68.706
1433	21:28:40	21.581	69.894	3.9	68.706
1434	21:28:50	21.581	69.894	3.9	68.706
1435	21:29:00	21.581	69.894	11.8	68.706
1436	21:29:10	21.581	69.894	3.9	68.706
1437	21:29:20	21.581	69.864	3.9	68.706
1438	21:29:30	21.581	69.835	3.9	68.706
1439	21:29:40	21.581	69.835	11.8	68.706
1440	21:29:50	21.581	69.835	11.8	68.706
1441	21:30:00	21.604	69.839	11.8	68.706
1442	21:30:10	21.604	69.839	11.8	68.706
1443	21:30:20	21.604	69.81	11.8	68.706
1444	21:30:30	21.604	69.81	3.9	68.706
1445	21:30:40	21.604	69.81	11.8	68.706
1446	21:30:50	21.604	69.81	11.8	68.706
1447	21:31:00	21.604	69.78	3.9	68.706
1448	21:31:10	21.604	69.78	11.8	68.706
1449	21:31:20	21.604	69.78	11.8	68.706
1450	21:31:30	21.628	69.755	11.8	68.706
1451	21:31:40	21.628	69.755	11.8	68.706
1452	21:31:50	21.628	69.755	11.8	68.706
1453	21:32:00	21.628	69.726	11.8	68.706
1454	21:32:10	21.628	69.726	11.8	68.706
1455	21:32:20	21.628	69.726	11.8	68.706
1456	21:32:30	21.628	69.696	11.8	68.706
1457	21:32:40	21.628	69.696	3.9	68.706
1458	21:32:50	21.628	69.696	11.8	68.706
1459	21:33:00	21.628	69.696	3.9	68.706
1460	21:33:10	21.652	69.7	11.8	68.706
1461	21:33:20	21.652	69.671	11.8	68.706
1462	21:33:30	21.652	69.671	11.8	68.706
1463	21:33:40	21.652	69.671	3.9	68.706
1464	21:33:50	21.652	69.641	3.9	68.706
1465	21:34:00	21.652	69.612	19.7	68.653
1466	21:34:10	21.748	68.002	19.7	68.813
1467	21:34:20					Logged
1468	21:34:30	21.795	69.314	11.8	68.813
1469	21:34:40	21.891	67.196	11.8	68.76
1470	21:34:50	22.011	65.334	90.7	68.706
1471	21:35:00	22.13	64.874	90.7	68.706
1472	21:35:10	22.226	64.409	90.7	68.706
1473	21:35:20	22.321	63.853	3.9	68.706
1474	21:35:30	22.393	63.351	90.7	68.706
1475	21:35:40	22.465	62.637	90.7	68.706
1476	21:35:50	22.513	62.372	90.7	68.706
1477	21:36:00	22.561	61.68	90.7	68.706
1478	21:36:10	22.609	61.11	90.7	68.706
1479	21:36:20	22.633	61.266	90.7	68.706
1480	21:36:30	22.633	60.961	90.7	68.706
1481	21:36:40	22.657	60.934	90.7	68.706
1482	21:36:50	22.681	60.174	90.7	68.706
1483	21:37:00	22.681	59.929	90.7	68.706		Logged

## Sheet: 20170518_NangGung
Plot Title: 20034486_20170518_NangGung
#	Date Time, GMT+08:00	Temp, °C (LGR S/N: 20034486, SEN S/N: 20034486)	RH, % (LGR S/N: 20034486, SEN S/N: 20034486)	Intensity, Lux (LGR S/N: 20034486, SEN S/N: 20034486)	Temp, °C (LGR S/N: 20034486, SEN S/N: 20034486)	Host Connected (LGR S/N: 20034486)	Stopped (LGR S/N: 20034486)	End Of File (LGR S/N: 20034486)
393	18:05:20	25.55	75.496	1202.3	66.32	time	Temp-av	temp-std	RH-av	Rh-std	Intensity, Lux-av	Int-std		interval
394	18:05:30	25.55	75.379	1186.5	65.969	before	23.414	0.80965	86.6167	4.36427	328.913	306.42	5/18/2017	18:05-18:40
395	18:05:40	25.55	75.086	1162.9	65.671	flash	22.2805	0.171942	92.8717	0.944678	7.613	4.76394	5/18/2017	18:40-19:30
396	18:05:50	25.55	75.291	1147.1	65.375
397	18:06:00	25.525	75.374	1131.3	65.228
398	18:06:10	25.501	75.428	973.6	65.033
399	18:06:20	25.453	75.71	950	64.887
400	18:06:30	25.428	76.056	1028.8	64.693
401	18:06:40	25.38	76.513	1013.1	64.501
402	18:06:50	25.331	76.706	942.1	64.405
403	18:07:00	25.307	76.672	934.2	64.261
404	18:07:10	25.258	76.895	926.3	64.07
405	18:07:20	25.21	77.263	910.6	63.928
406	18:07:30	25.162	77.108	839.6	63.786
407	18:07:40	25.113	77.562	855.4	63.786
408	18:07:50	25.065	77.842	934.2	63.739
409	18:08:00	25.016	77.977	894.8	63.645
410	18:08:10	24.944	78.337	886.9	63.598
411	18:08:20	24.895	78.818	894.8	63.504
412	18:08:30	24.847	79.153	894.8	63.457
413	18:08:40	24.823	79.234	879	63.364
414	18:08:50	24.774	79.397	871.2	63.224
415	18:09:00	24.726	79.128	855.4	63.131
416	18:09:10	24.702	79.324	839.6	63.038
417	18:09:20	24.653	79.285	831.7	62.992
418	18:09:30	24.605	79.447	816	62.9
419	18:09:40	24.581	79.901	800.2	62.853
420	18:09:50	24.532	80.435	792.3	62.761
421	18:10:00	24.508	80.744	776.6	62.669
422	18:10:10	24.46	80.763	752.9	62.578
423	18:10:20	24.436	80.872	721.4	62.486
424	18:10:30	24.388	80.833	737.1	62.441
425	18:10:40	24.363	81.341	729.2	62.349
426	18:10:50	24.315	81.757	713.5	62.349
427	18:11:00	24.291	82.093	697.7	62.304
428	18:11:10	24.267	82.002	689.8	62.304
429	18:11:20	24.219	81.736	681.9	62.304
430	18:11:30	24.195	82.214	674.1	62.304
431	18:11:40	24.146	82.231	666.2	62.304
432	18:11:50	24.122	82.538	618.9	62.304
433	18:12:00	24.098	82.533	524.3	62.304
434	18:12:10	24.074	83.008	532.2	62.304
435	18:12:20	24.05	83.003	516.4	62.304
436	18:12:30	24.026	83.421	508.5	62.304
437	18:12:40	24.002	83.557	587.3	62.304
438	18:12:50	23.978	83.692	579.5	62.304
439	18:13:00	23.93	83.963	579.5	62.304
440	18:13:10	23.905	83.902	540	62.304
441	18:13:20	23.881	83.812	524.3	62.304
442	18:13:30	23.881	84.262	516.4	62.258
443	18:13:40	23.857	85.098	232.6	62.304
444	18:13:50	23.833	84.391	547.9	62.304
445	18:14:00	23.809	84.414	508.5	62.258
446	18:14:10	23.785	84.885	500.6	62.258
447	18:14:20	23.785	84.661	469.1	62.258
448	18:14:30	23.761	84.824	500.6	62.213
449	18:14:40	23.737	85.406	500.6	62.213
450	18:14:50	23.713	85.065	492.7	62.213
451	18:15:00	23.689	84.976	484.9	62.213
452	18:15:10	23.689	85.06	335.1	62.258
453	18:15:20	23.665	85.194	327.2	62.258
454	18:15:30	23.641	85.273	469.1	62.258
455	18:15:40	23.641	85.58	461.2	62.213
456	18:15:50	23.617	85.826	445.4	62.213
457	18:16:00	23.593	85.876	453.3	62.213
458	18:16:10	23.593	85.681	437.5	62.213
459	18:16:20	23.569	85.452	437.5	62.213
460	18:16:30	23.545	85.586	429.7	62.213
461	18:16:40	23.545	85.725	421.8	62.213
462	18:16:50	23.521	85.692	406	62.213
463	18:17:00	23.497	85.659	366.6	62.213
464	18:17:10	23.497	85.91	406	62.213
465	18:17:20	23.472	86.155	398.1	62.213
466	18:17:30	23.448	86.316	390.2	62.213
467	18:17:40	23.448	86.594	382.4	62.213
468	18:17:50	23.424	86.505	382.4	62.168
469	18:18:00	23.4	86.083	374.5	62.168
470	18:18:10	23.4	86.083	374.5	62.168
471	18:18:20	23.376	86.3	366.6	62.122
472	18:18:30	23.376	86.355	358.7	62.077
473	18:18:40	23.352	86.878	350.8	62.032
474	18:18:50	23.352	86.85	342.9	61.987
475	18:19:00	23.328	87.038	335.1	61.987
476	18:19:10	23.328	86.705	335.1	61.942
477	18:19:20	23.304	86.95	327.2	61.852
478	18:19:30	23.28	87.387	319.3	61.807
479	18:19:40	23.28	87.083	311.4	61.762
480	18:19:50	23.256	86.855	311.4	61.717
481	18:20:00	23.256	87.105	303.5	61.672	2017-0518-1820spec	Temp, °C (LGR S/N: 20034486, SEN S/N: 20034486)	RH, % (LGR S/N: 20034486, SEN S/N: 20034486)	Intensity, Lux (LGR S/N: 20034486, SEN S/N: 20034486)	stdev-temp	stedev-RH	stdev-Lux
482	18:20:10	23.256	87.216	303.5	61.627		23.232	87.3853	294.333	0.0214663	0.216711	7.71639
483	18:20:20	23.232	87.321	295.6	61.627
484	18:20:30	23.232	87.404	287.8	61.583
485	18:20:40	23.208	87.619	287.8	61.538
486	18:20:50	23.208	87.647	287.8	61.538
487	18:21:00	23.184	87.669	279.9	61.493
488	18:21:10	23.184	87.724	279.9	61.493
489	18:21:20	23.16	87.967	272	61.449
490	18:21:30	23.16	88.243	264.1	61.449
491	18:21:40	23.136	88.292	264.1	61.404
492	18:21:50	23.136	88.292	248.3	61.404
493	18:22:00	23.112	88.369	240.5	61.36
494	18:22:10	23.112	88.562	232.6	61.36
495	18:22:20	23.088	88.694	224.7	61.315
496	18:22:30	23.088	88.804	208.9	61.315
497	18:22:40	23.088	88.832	201	61.271
498	18:22:50	23.088	88.887	193.2	61.227
499	18:23:00	23.064	88.853	177.4	61.227
500	18:23:10	23.064	88.606	169.5	61.182
501	18:23:20	23.064	88.578	161.6	61.138
502	18:23:30	23.064	88.441	161.6	61.094
503	18:23:40	23.064	88.716	161.6	61.094
504	18:23:50	23.064	88.881	153.7	61.05
505	18:24:00	23.04	88.49	169.5	61.05
506	18:24:10	23.04	88.545	169.5	61.05
507	18:24:20	23.04	88.71	161.6	61.006
508	18:24:30	23.04	88.82	169.5	61.006
509	18:24:40	23.016	88.924	169.5	61.006
510	18:24:50	23.016	88.897	177.4	61.006
511	18:25:00	23.016	88.952	185.3	60.962
512	18:25:10	23.016	89.062	185.3	60.962
513	18:25:20	23.016	88.869	193.2	60.918
514	18:25:30	23.016	88.869	193.2	60.918
515	18:25:40	22.992	88.974	193.2	60.918
516	18:25:50	22.992	89.248	201	60.918
517	18:26:00	22.992	89.413	201	60.874
518	18:26:10	22.992	89.358	193.2	60.874
519	18:26:20	22.968	89.544	201	60.874
520	18:26:30	22.968	89.626	193.2	60.874
521	18:26:40	22.968	89.571	185.3	60.83
522	18:26:50	22.968	89.352	185.3	60.83
523	18:27:00	22.944	88.962	177.4	60.83
524	18:27:10	22.944	88.935	177.4	60.83
525	18:27:20	22.944	89.017	177.4	60.83
526	18:27:30	22.944	89.209	177.4	60.83
527	18:27:40	22.92	89.395	169.5	60.83
528	18:27:50	22.92	89.505	161.6	60.83
529	18:28:00	22.92	89.478	161.6	60.83	2017-0518-1828spec	Temp, °C (LGR S/N: 20034486, SEN S/N: 20034486)	RH, % (LGR S/N: 20034486, SEN S/N: 20034486)	Intensity, Lux (LGR S/N: 20034486, SEN S/N: 20034486)	stdev-temp	stedev-RH	stdev-Lux
530	18:28:10	22.92	89.341	153.7	60.83		22.912	89.5898	151.067	0.0123935	0.1841	6.45032
531	18:28:20	22.92	89.642	153.7	60.83
532	18:28:30	22.92	89.888	145.8	60.786
533	18:28:40	22.896	89.636	145.8	60.786
534	18:28:50	22.896	89.554	145.8	60.786
535	18:29:00	22.872	89.658	138	60.786
536	18:29:10	22.872	89.795	138	60.786
537	18:29:20	22.872	89.986	130.1	60.83
538	18:29:30	22.872	90.095	122.2	60.83
539	18:29:40	22.848	90.035	122.2	60.83
540	18:29:50	22.848	90.062	114.3	60.83
541	18:30:00	22.848	89.926	114.3	60.83
542	18:30:10	22.848	90.144	106.4	60.83
543	18:30:20	22.824	89.92	106.4	60.786
544	18:30:30	22.824	89.892	98.5	60.786
545	18:30:40	22.824	90.029	98.5	60.786
546	18:30:50	22.824	89.974	90.7	60.786
547	18:31:00	22.824	90.166	90.7	60.786
548	18:31:10	22.824	90.357	90.7	60.786
549	18:31:20	22.824	90.084	90.7	60.786
550	18:31:30	22.8	90.242	82.8	60.786
551	18:31:40	22.8	90.46	67	60.786
552	18:31:50	22.8	90.324	67	60.742
553	18:32:00	22.8	90.46	67	60.742
554	18:32:10	22.8	90.351	59.1	60.742
555	18:32:20	22.8	90.405	59.1	60.699
556	18:32:30	22.776	90.372	51.2	60.699
557	18:32:40	22.776	90.372	51.2	60.699
558	18:32:50	22.776	90.291	43.4	60.699
559	18:33:00	22.776	90.127	43.4	60.699
560	18:33:10	22.776	89.854	43.4	60.699
561	18:33:20	22.776	89.251	43.4	60.699
562	18:33:30	22.776	89.69	43.4	60.742
563	18:33:40	22.776	89.635	43.4	60.742
564	18:33:50	22.753	89.739	43.4	60.742
565	18:34:00	22.776	89.69	43.4	60.742	2017-0518-1834spec	Temp, °C (LGR S/N: 20034486, SEN S/N: 20034486)	RH, % (LGR S/N: 20034486, SEN S/N: 20034486)	Intensity, Lux (LGR S/N: 20034486, SEN S/N: 20034486)	stdev-temp	stedev-RH	stdev-Lux
566	18:34:10	22.776	89.744	43.4	60.742		22.7645	89.7323	43.4	0.0125976	0.0644598	0
567	18:34:20	22.776	89.799	43.4	60.742
568	18:34:30	22.753	89.739	43.4	60.742
569	18:34:40	22.753	89.629	43.4	60.742
570	18:34:50	22.753	89.793	43.4	60.786
571	18:35:00	22.753	89.793	35.5	60.786
572	18:35:10	22.753	89.957	35.5	60.786
573	18:35:20	22.729	89.951	35.5	60.742
574	18:35:30	22.729	90.088	35.5	60.742
575	18:35:40	22.729	90.143	35.5	60.786
576	18:35:50	22.729	90.115	35.5	60.742
577	18:36:00	22.705	90.055	35.5	60.742
578	18:36:10	22.705	90	35.5	60.742
579	18:36:20	22.705	90.219	35.5	60.786
580	18:36:30	22.705	90.273	35.5	60.742
581	18:36:40	22.705	90.219	35.5	60.742
582	18:36:50	22.705	90.246	35.5	60.742
583	18:37:00	22.705	90.328	35.5	60.742
584	18:37:10	22.681	90.322	35.5	60.742
585	18:37:20	22.681	90.349	35.5	60.742
586	18:37:30	22.681	90.322	35.5	60.742
587	18:37:40	22.681	90.322	35.5	60.742
588	18:37:50	22.681	90.458	35.5	60.699
589	18:38:00	22.657	90.398	35.5	60.742
590	18:38:10	22.657	90.371	35.5	60.742
591	18:38:20	22.657	90.643	35.5	60.699
592	18:38:30	22.657	90.643	35.5	60.699
593	18:38:40	22.633	90.637	35.5	60.742
594	18:38:50	22.657	90.752	27.6	60.699
595	18:39:00	22.633	90.583	27.6	60.742
596	18:39:10	22.633	90.528	27.6	60.699
597	18:39:20	22.633	90.583	27.6	60.699
598	18:39:30	22.633	90.637	27.6	60.699
599	18:39:40	22.633	90.637	27.6	60.699
600	18:39:50	22.633	90.637	27.6	60.699
601	18:40:00	22.609	90.686	27.6	60.699
602	18:40:10	22.609	90.904	27.6	60.699
603	18:40:20	22.609	91.067	27.6	60.699
604	18:40:30	22.609	91.094	27.6	60.699
605	18:40:40	22.609	90.985	27.6	60.699
606	18:40:50	22.609	90.958	27.6	60.699
607	18:41:00	22.585	91.034	27.6	60.655	2017-0518-1841beforespec	Temp, °C (LGR S/N: 20034486, SEN S/N: 20034486)	RH, % (LGR S/N: 20034486, SEN S/N: 20034486)	Intensity, Lux (LGR S/N: 20034486, SEN S/N: 20034486)	stdev-temp	stedev-RH	stdev-Lux
608	18:41:10	22.609	91.121	19.7	60.655		22.589	90.9757	21.0167	0.00979796	0.140248	3.22516
609	18:41:20	22.585	91.142	19.7	60.655
610	18:41:30	22.585	90.843	19.7	60.655
611	18:41:40	22.585	90.871	19.7	60.611
612	18:41:50	22.585	90.843	19.7	60.611
613	18:42:00	22.585	91.115	19.7	60.611
614	18:42:10	22.585	91.387	19.7	60.568
615	18:42:20	22.585	91.305	19.7	60.568
616	18:42:30	22.561	91.109	19.7	60.524
617	18:42:40	22.561	91.109	19.7	60.481
618	18:42:50	22.561	91.137	19.7	60.481
619	18:43:00	22.561	91.055	19.7	60.481
620	18:43:10	22.561	91.028	19.7	60.437
621	18:43:20	22.561	91.109	11.8	60.394
622	18:43:30	22.561	91.164	11.8	60.394
623	18:43:40	22.537	91.348	19.7	60.35
624	18:43:50	22.537	91.294	11.8	60.307
625	18:44:00	22.537	91.375	11.8	60.307
626	18:44:10	22.537	91.321	11.8	60.264
627	18:44:20	22.537	91.321	11.8	60.264
628	18:44:30	22.537	91.402	11.8	60.22
629	18:44:40	22.513	91.261	11.8	60.22
630	18:44:50	22.513	91.071	11.8	60.177
631	18:45:00	22.513	91.098	11.8	60.177
632	18:45:10	22.537	91.375	11.8	60.134
633	18:45:20	22.513	91.478	11.8	60.134
634	18:45:30	22.513	91.478	11.8	60.091
635	18:45:40	22.513	91.532	11.8	60.091
636	18:45:50	22.513	91.64	11.8	60.048
637	18:46:00	22.489	91.472	11.8	60.048
638	18:46:10	22.489	91.472	11.8	60.005
639	18:46:20	22.489	91.634	11.8	60.005
640	18:46:30	22.489	91.634	11.8	60.005
641	18:46:40	22.489	91.743	11.8	59.962
642	18:46:50	22.489	91.634	11.8	59.962
643	18:47:00	22.489	91.58	11.8	59.919
644	18:47:10	22.489	91.716	11.8	59.919
645	18:47:20	22.489	91.716	3.9	59.876
646	18:47:30	22.489	91.743	11.8	59.876
647	18:47:40	22.489	91.743	11.8	59.833
648	18:47:50	22.489	91.824	11.8	59.79
649	18:48:00	22.489	91.905	11.8	59.79	2017-0518-1848flashspec	Temp, °C (LGR S/N: 20034486, SEN S/N: 20034486)	RH, % (LGR S/N: 20034486, SEN S/N: 20034486)	Intensity, Lux (LGR S/N: 20034486, SEN S/N: 20034486)	stdev-temp	stedev-RH	stdev-Lux
650	18:48:10	22.489	91.878	11.8	59.748		22.489	91.7925	7.85	0	0.0910291	4.32701
651	18:48:20	22.489	91.797	3.9	59.748
652	18:48:30	22.489	91.797	11.8	59.705
653	18:48:40	22.489	91.689	3.9	59.705
654	18:48:50	22.489	91.689	3.9	59.662
655	18:49:00	22.489	91.743	11.8	59.662
656	18:49:10	22.489	91.743	3.9	59.662
657	18:49:20	22.465	91.683	11.8	59.62
658	18:49:30	22.489	91.743	3.9	59.62
659	18:49:40	22.489	91.797	11.8	59.62
660	18:49:50	22.489	91.959	11.8	59.62
661	18:50:00	22.465	92.008	11.8	59.62
662	18:50:10	22.465	91.953	3.9	59.577
663	18:50:20	22.465	92.062	11.8	59.577
664	18:50:30	22.465	92.17	3.9	59.577
665	18:50:40	22.465	92.17	3.9	59.577
666	18:50:50	22.465	92.089	3.9	59.577
667	18:51:00	22.465	92.008	11.8	59.534
668	18:51:10	22.465	92.008	11.8	59.534
669	18:51:20	22.441	91.92	3.9	59.534
670	18:51:30	22.441	91.731	11.8	59.534
671	18:51:40	22.441	91.947	3.9	59.534
672	18:51:50	22.441	91.92	11.8	59.534
673	18:52:00	22.441	91.947	3.9	59.534
674	18:52:10	22.441	92.002	11.8	59.492
675	18:52:20	22.441	92.056	3.9	59.492
676	18:52:30	22.441	92.002	3.9	59.492
677	18:52:40	22.441	91.975	3.9	59.492
678	18:52:50	22.441	92.083	3.9	59.492
679	18:53:00	22.441	92.029	11.8	59.492
680	18:53:10	22.441	92.164	11.8	59.492
681	18:53:20	22.441	92.164	3.9	59.492
682	18:53:30	22.441	92.137	3.9	59.492
683	18:53:40	22.441	92.218	3.9	59.492
684	18:53:50	22.441	92.407	3.9	59.492
685	18:54:00	22.441	92.488	3.9	59.45	2017-0518-1854flyspec	Temp, °C (LGR S/N: 20034486, SEN S/N: 20034486)	RH, % (LGR S/N: 20034486, SEN S/N: 20034486)	Intensity, Lux (LGR S/N: 20034486, SEN S/N: 20034486)	stdev-temp	stedev-RH	stdev-Lux
686	18:54:10	22.441	92.353	3.9	59.45		22.425	92.3895	7.85	0.0123935	0.0687888	4.32701
687	18:54:20	22.417	92.428	3.9	59.45
688	18:54:30	22.417	92.428	11.8	59.45
689	18:54:40	22.417	92.32	11.8	59.45
690	18:54:50	22.417	92.32	11.8	59.45
691	18:55:00	22.417	92.347	3.9	59.45
692	18:55:10	22.417	92.374	3.9	59.45
693	18:55:20	22.417	92.428	3.9	59.45
694	18:55:30	22.393	92.476	3.9	59.45
695	18:55:40	22.417	92.455	11.8	59.45
696	18:55:50	22.393	92.368	11.8	59.407
697	18:56:00	22.393	92.476	3.9	59.45
698	18:56:10	22.393	92.638	3.9	59.407
699	18:56:20	22.393	92.692	3.9	59.407
700	18:56:30	22.393	92.746	11.8	59.407
701	18:56:40	22.393	92.665	3.9	59.407
702	18:56:50	22.393	92.53	3.9	59.407
703	18:57:00	22.393	92.503	11.8	59.407
704	18:57:10	22.393	92.53	3.9	59.407
705	18:57:20	22.393	92.53	3.9	59.407
706	18:57:30	22.393	92.638	3.9	59.407
707	18:57:40	22.393	92.584	11.8	59.407
708	18:57:50	22.393	92.584	11.8	59.407
709	18:58:00	22.393	92.53	3.9	59.407
710	18:58:10	22.369	92.605	11.8	59.407
711	18:58:20	22.393	92.53	3.9	59.365
712	18:58:30	22.369	92.578	11.8	59.365
713	18:58:40	22.369	92.632	3.9	59.365
714	18:58:50	22.369	92.686	3.9	59.365
715	18:59:00	22.369	92.686	11.8	59.365
716	18:59:10	22.369	92.659	3.9	59.365
717	18:59:20	22.369	92.713	11.8	59.365
718	18:59:30	22.369	92.767	3.9	59.365
719	18:59:40	22.369	92.767	3.9	59.365
720	18:59:50	22.369	92.578	11.8	59.365
721	19:00:00	22.369	92.362	3.9	59.365
722	19:00:10	22.345	92.302	3.9	59.365
723	19:00:20	22.345	92.167	3.9	59.365
724	19:00:30	22.345	92.167	11.8	59.365
725	19:00:40	22.345	92.302	3.9	59.365
726	19:00:50	22.345	92.437	3.9	59.365
727	19:01:00	22.345	92.545	3.9	59.365
728	19:01:10	22.345	92.572	3.9	59.365
729	19:01:20	22.345	92.545	11.8	59.365
730	19:01:30	22.345	92.491	3.9	59.365
731	19:01:40	22.321	92.485	3.9	59.365
732	19:01:50	22.321	92.323	11.8	59.365
733	19:02:00	22.321	92.188	3.9	59.365
734	19:02:10	22.298	92.29	3.9	59.365
735	19:02:20	22.298	92.398	3.9	59.365
736	19:02:30	22.298	92.587	3.9	59.365
737	19:02:40	22.298	92.722	3.9	59.365
738	19:02:50	22.298	92.776	3.9	59.365
739	19:03:00	22.298	92.857	11.8	59.365
740	19:03:10	22.298	92.83	11.8	59.322
741	19:03:20	22.298	92.695	3.9	59.322
742	19:03:30	22.298	92.614	3.9	59.322
743	19:03:40	22.298	92.533	3.9	59.322
744	19:03:50	22.321	92.889	3.9	59.322
745	19:04:00	22.321	92.943	3.9	59.322
746	19:04:10	22.321	92.701	3.9	59.28
747	19:04:20	22.298	92.776	3.9	59.28
748	19:04:30	22.298	92.83	3.9	59.28
749	19:04:40	22.298	92.883	3.9	59.28
750	19:04:50	22.298	93.045	11.8	59.28
751	19:05:00	22.298	93.099	11.8	59.28
752	19:05:10	22.298	93.045	3.9	59.28
753	19:05:20	22.298	92.991	3.9	59.28
754	19:05:30	22.298	92.937	11.8	59.28
755	19:05:40	22.298	92.964	3.9	59.28
756	19:05:50	22.298	93.045	3.9	59.28
757	19:06:00	22.298	93.206	11.8	59.28
758	19:06:10	22.298	93.206	3.9	59.28
759	19:06:20	22.298	93.206	3.9	59.28
760	19:06:30	22.298	93.126	3.9	59.238
761	19:06:40	22.298	92.991	3.9	59.238
762	19:06:50	22.298	92.991	3.9	59.238
763	19:07:00	22.298	92.937	3.9	59.238
764	19:07:10	22.298	93.045	11.8	59.238
765	19:07:20	22.298	93.099	3.9	59.196
766	19:07:30	22.274	93.12	3.9	59.196
767	19:07:40	22.274	93.147	11.8	59.196
768	19:07:50	22.274	93.093	3.9	59.196
769	19:08:00	22.274	93.039	3.9	59.196
770	19:08:10	22.274	93.039	3.9	59.154
771	19:08:20	22.274	93.12	3.9	59.154
772	19:08:30	22.274	93.147	11.8	59.154
773	19:08:40	22.25	93.087	3.9	59.154
774	19:08:50	22.25	92.979	3.9	59.154
775	19:09:00	22.25	92.872	3.9	59.111
776	19:09:10	22.25	92.898	11.8	59.111
777	19:09:20	22.25	92.925	11.8	59.111
778	19:09:30	22.226	93	3.9	59.111
779	19:09:40	22.226	93.027	3.9	59.111
780	19:09:50	22.226	93.081	3.9	59.111
781	19:10:00	22.226	93.081	3.9	59.069
782	19:10:10	22.226	93.027	3.9	59.069
783	19:10:20	22.226	93.108	3.9	59.069
784	19:10:30	22.226	93.188	3.9	59.069
785	19:10:40	22.226	93.242	11.8	59.069
786	19:10:50	22.226	93.323	11.8	59.069
787	19:11:00	22.226	93.457	11.8	59.027
788	19:11:10	22.226	93.296	3.9	59.027
789	19:11:20	22.226	93.403	11.8	59.027
790	19:11:30	22.226	93.403	3.9	59.027
791	19:11:40	22.226	93.403	3.9	59.027
792	19:11:50	22.202	93.344	11.8	59.027
793	19:12:00	22.202	93.317	11.8	58.985
794	19:12:10	22.202	93.021	3.9	58.985
795	19:12:20	22.178	93.015	11.8	58.985
796	19:12:30	22.178	93.069	3.9	58.985
797	19:12:40	22.178	93.069	11.8	58.985
798	19:12:50	22.178	93.069	3.9	58.943
799	19:13:00	22.178	93.096	11.8	58.985
800	19:13:10	22.178	93.069	11.8	58.943
801	19:13:20	22.154	92.928	3.9	58.943
802	19:13:30	22.154	92.901	3.9	58.943
803	19:13:40	22.154	92.955	11.8	58.943
804	19:13:50	22.154	92.955	3.9	58.943
805	19:14:00	22.154	93.117	3.9	58.943
806	19:14:10	22.154	93.117	11.8	58.902
807	19:14:20	22.154	93.144	11.8	58.902
808	19:14:30	22.154	93.197	3.9	58.902
809	19:14:40	22.13	93.218	3.9	58.902
810	19:14:50	22.13	93.326	11.8	58.902
811	19:15:00	22.13	93.272	11.8	58.902
812	19:15:10	22.13	93.164	3.9	58.902
813	19:15:20	22.13	93.272	3.9	58.902
814	19:15:30	22.154	93.332	3.9	58.902
815	19:15:40	22.13	93.46	3.9	58.902
816	19:15:50	22.13	93.299	3.9	58.902
817	19:16:00	22.106	93.266	3.9	58.902
818	19:16:10	22.106	93.32	3.9	58.86
819	19:16:20	22.106	93.32	3.9	58.86
820	19:16:30	22.106	93.4	11.8	58.86
821	19:16:40	22.106	93.373	3.9	58.86
822	19:16:50	22.106	93.427	3.9	58.86
823	19:17:00	22.106	93.481	11.8	58.86
824	19:17:10	22.13	93.674	11.8	58.86
825	19:17:20	22.106	93.802	11.8	58.86
826	19:17:30	22.106	93.802	3.9	58.86
827	19:17:40	22.106	93.695	3.9	58.86
828	19:17:50	22.106	93.668	3.9	58.86
829	19:18:00	22.082	93.716	11.8	58.818
830	19:18:10	22.082	93.796	11.8	58.818
831	19:18:20	22.082	93.796	11.8	58.818
832	19:18:30	22.082	93.77	3.9	58.818
833	19:18:40	22.082	93.77	3.9	58.818
834	19:18:50	22.082	93.796	3.9	58.818
835	19:19:00	22.082	93.689	3.9	58.818
836	19:19:10	22.082	93.662	11.8	58.818
837	19:19:20	22.082	93.743	11.8	58.818
838	19:19:30	22.082	93.796	3.9	58.818
839	19:19:40	22.082	93.743	3.9	58.818
840	19:19:50	22.082	93.743	3.9	58.818
841	19:20:00	22.082	93.796	11.8	58.776
842	19:20:10	22.082	93.85	3.9	58.776
843	19:20:20	22.082	93.957	3.9	58.776
844	19:20:30	22.082	93.77	11.8	58.776
845	19:20:40	22.082	93.796	3.9	58.776
846	19:20:50	22.082	94.064	3.9	58.776
847	19:21:00	22.082	94.064	3.9	58.776
848	19:21:10	22.082	94.145	11.8	58.734
849	19:21:20	22.082	94.118	3.9	58.734
850	19:21:30	22.082	94.198	3.9	58.734
851	19:21:40	22.082	94.225	11.8	58.734
852	19:21:50	22.058	94.165	11.8	58.734
853	19:22:00	22.058	94.165	3.9	58.734
854	19:22:10	22.058	94.058	3.9	58.734
855	19:22:20	22.058	94.058	3.9	58.734
856	19:22:30	22.058	94.058	3.9	58.734
857	19:22:40	22.058	94.058	3.9	58.693
858	19:22:50	22.058	94.138	11.8	58.693
859	19:23:00	22.058	94.031	3.9	58.693
860	19:23:10	22.058	93.898	11.8	58.693
861	19:23:20	22.058	94.058	3.9	58.693
862	19:23:30	22.058	94.005	3.9	58.693
863	19:23:40	22.058	94.112	3.9	58.693
864	19:23:50	22.058	94.219	11.8	58.693
865	19:24:00	22.058	94.165	3.9	58.693
866	19:24:10	22.058	94.031	11.8	58.693
867	19:24:20	22.058	94.005	3.9	58.651
868	19:24:30	22.058	94.031	3.9	58.651
869	19:24:40	22.058	94.058	3.9	58.651
870	19:24:50	22.058	94.165	3.9	58.651
871	19:25:00	22.058	94.112	3.9	58.651
872	19:25:10	22.058	94.005	3.9	58.651
873	19:25:20	22.058	94.031	11.8	58.651
874	19:25:30	22.058	94.245	3.9	58.651
875	19:25:40	22.058	94.165	3.9	58.609
876	19:25:50	22.058	93.951	11.8	58.651
877	19:26:00	22.058	94.058	3.9	58.651
878	19:26:10	22.082	94.332	3.9	58.609
879	19:26:20	22.082	94.385	3.9	58.609
880	19:26:30	22.058	94.272	3.9	58.609
881	19:26:40	22.058	94.112	3.9	58.609
882	19:26:50	22.058	94.138	3.9	58.609
883	19:27:00	22.058	94.165	3.9	58.609
884	19:27:10	22.058	94.192	3.9	58.609
885	19:27:20	22.058	94.165	3.9	58.609
886	19:27:30	22.058	94.165	3.9	58.609
887	19:27:40	22.058	94.219	11.8	58.568
888	19:27:50	22.058	94.272	3.9	58.568
889	19:28:00	22.058	94.272	3.9	58.568
890	19:28:10	22.058	94.272	11.8	58.568
891	19:28:20	22.058	94.326	3.9	58.568
892	19:28:30	22.058	94.245	3.9	58.568
893	19:28:40	22.058	94.192	3.9	58.526
894	19:28:50	22.058	94.219	3.9	58.526
895	19:29:00	22.082	94.225	3.9	58.526
896	19:29:10	22.082	94.225	3.9	58.526
897	19:29:20	22.082	94.278	3.9	58.526
898	19:29:30	22.058	94.165	3.9	58.485
899	19:29:40	22.058	94.138	3.9	58.485
900	19:29:50	22.058	94.165	3.9	58.485
901	19:30:00	22.058	94.112	3.9	58.485
902	19:30:10	22.058	94.058	11.8	58.485
903	19:30:20	22.058	94.138	11.8	58.485
904	19:30:30	22.082	94.225	3.9	58.485
905	19:30:40	22.082	94.385	11.8	58.485
906	19:30:50	22.082	94.305	3.9	58.485
907	19:31:00	22.082	94.171	3.9	58.485
908	19:31:10	22.082	94.171	11.8	58.485
909	19:31:20	22.082	94.278	11.8	58.485
910	19:31:30	22.082	94.305	3.9	58.485
911	19:31:40	22.082	94.305	3.9	58.485
912	19:31:50	22.058	94.299	3.9	58.485
913	19:32:00	22.082	94.278	3.9	58.443
914	19:32:10	22.058	94.192	11.8	58.443
915	19:32:20	22.058	94.112	3.9	58.443
916	19:32:30	22.058	94.112	11.8	58.443
917	19:32:40	22.058	94.112	11.8	58.443
918	19:32:50	22.058	94.112	3.9	58.443
919	19:33:00	22.082	94.145	11.8	58.443
920	19:33:10	22.082	94.118	11.8	58.443
921	19:33:20	22.058	94.112	3.9	58.402
922	19:33:30	22.058	94.058	11.8	58.443
923	19:33:40	22.058	94.112	11.8	58.443
924	19:33:50	22.082	94.198	3.9	58.443
925	19:34:00	22.082	94.278	3.9	58.443
926	19:34:10	22.082	94.278	3.9	58.443
927	19:34:20	22.082	94.171	3.9	58.443
928	19:34:30	22.058	94.058	3.9	58.443
929	19:34:40	22.058	94.031	3.9	58.443
930	19:34:50	22.058	94.058	11.8	58.443
931	19:35:00	22.058	94.058	3.9	58.443
932	19:35:10	22.058	94.058	11.8	58.402
933	19:35:20	22.058	94.112	3.9	58.402
934	19:35:30	22.058	94.112	3.9	58.402
935	19:35:40	22.058	94.085	11.8	58.402
936	19:35:50	22.058	94.085	3.9	58.402
937	19:36:00	22.058	94.058	11.8	58.402
938	19:36:10	22.058	94.085	3.9	58.402
939	19:36:20	22.058	94.058	3.9	58.402
940	19:36:30	22.058	94.112	3.9	58.402
941	19:36:40	22.058	94.058	11.8	58.402
942	19:36:50	22.058	94.031	11.8	58.402
943	19:37:00	22.082	94.118	11.8	58.402
944	19:37:10	22.082	94.385	3.9	58.402
945	19:37:20	22.082	94.439	11.8	58.402
946	19:37:30	22.058	94.379	3.9	58.402
947	19:37:40	22.058	94.272	3.9	58.402
948	19:37:50	22.058	94.031	3.9	58.402
949	19:38:00	22.058	94.058	11.8	58.402
950	19:38:10	22.058	94.112	3.9	58.402
951	19:38:20	22.058	94.272	3.9	58.402
952	19:38:30	22.058	94.299	3.9	58.402
953	19:38:40	22.058	94.219	11.8	58.402
954	19:38:50	22.034	94.266	3.9	58.402
955	19:39:00	22.058	94.272	3.9	58.402
956	19:39:10	22.058	94.299	3.9	58.402
957	19:39:20	22.058	94.326	3.9	58.402
958	19:39:30	22.034	94.373	3.9	58.443
959	19:39:40	22.034	94.373	3.9	58.443
960	19:39:50	22.034	94.373	3.9	58.402
961	19:40:00	22.034	94.373	3.9	58.443
962	19:40:10	22.034	94.346	3.9	58.402
963	19:40:20	22.034	94.266	3.9	58.443
964	19:40:30	22.034	94.266	3.9	58.402
965	19:40:40	22.034	94.32	11.8	58.443
966	19:40:50	22.034	94.32	11.8	58.402
967	19:41:00	22.034	94.373	3.9	58.402
968	19:41:10	22.034	94.48	11.8	58.402
969	19:41:20	22.034	94.426	3.9	58.402
970	19:41:30	22.011	94.367	3.9	58.402
971	19:41:40	22.011	94.42	3.9	58.443
972	19:41:50	22.011	94.474	3.9	58.443
973	19:42:00	22.011	94.527	3.9	58.443
974	19:42:10	22.011	94.474	3.9	58.443
975	19:42:20	22.011	94.527	3.9	58.443
976	19:42:30	22.011	94.474	3.9	58.443
977	19:42:40	22.011	94.474	3.9	58.443
978	19:42:50	22.011	94.527	3.9	58.443
979	19:43:00	22.011	94.581	3.9	58.443
980	19:43:10	22.011	94.581	3.9	58.443
981	19:43:20	22.011	94.581	3.9	58.443
982	19:43:30	22.011	94.527	3.9	58.443
983	19:43:40	22.011	94.581	11.8	58.443
984	19:43:50	22.011	94.527	11.8	58.443
985	19:44:00	22.011	94.527	3.9	58.443
986	19:44:10	21.987	94.521	11.8	58.443
987	19:44:20	21.987	94.574	3.9	58.443
988	19:44:30	21.987	94.521	3.9	58.443
989	19:44:40	21.987	94.494	3.9	58.443
990	19:44:50	21.987	94.521	3.9	58.443
991	19:45:00	21.987	94.628	3.9	58.443
992	19:45:10	21.987	94.574	11.8	58.443
993	19:45:20	21.987	94.574	11.8	58.443
994	19:45:30	21.987	94.574	3.9	58.443
995	19:45:40	21.987	94.548	11.8	58.443
996	19:45:50	21.963	94.515	11.8	58.443
997	19:46:00	21.963	94.542	3.9	58.443
998	19:46:10	21.963	94.568	11.8	58.443
999	19:46:20	21.963	94.622	3.9	58.443
1000	19:46:30	21.963	94.622	3.9	58.443
1001	19:46:40	21.963	94.622	3.9	58.443
1002	19:46:50	21.963	94.702	3.9	58.443
1003	19:47:00	21.963	94.675	3.9	58.443
1004	19:47:10	21.939	94.642	11.8	58.443
1005	19:47:20	21.939	94.669	3.9	58.443
1006	19:47:30	21.939	94.696	11.8	58.443
1007	19:47:40	21.939	94.669	3.9	58.443
1008	19:47:50	21.939	94.696	11.8	58.443
1009	19:48:00	21.939	94.722	11.8	58.443
1010	19:48:10	21.939	94.802	3.9	58.443
1011	19:48:20	21.939	94.776	3.9	58.443
1012	19:48:30	21.939	94.776	11.8	58.443
1013	19:48:40	21.939	94.802	11.8	58.443
1014	19:48:50	21.939	94.829	3.9	58.443
1015	19:49:00	21.939	94.776	3.9	58.402
1016	19:49:10	21.939	94.829	3.9	58.443
1017	19:49:20	21.939	94.829	3.9	58.443
1018	19:49:30	21.939	94.696	3.9	58.443
1019	19:49:40	21.939	94.616	11.8	58.443
1020	19:49:50	21.939	94.642	3.9	58.443
1021	19:50:00	22.011	95.699	3.9	58.485
1022	19:50:10	22.178	97.91	3.9	58.609
1023	19:50:20	22.321	98.632	11.8	58.943
1024	19:50:30	22.417	97.235	11.8	59.28
1025	19:50:40	22.537	95.302	3.9	59.577
1026	19:50:50	22.657	94.451	3.9	59.79
1027	19:51:00	22.753	93.509	11.8	59.833
1028	19:51:10	22.848	92.751	3.9	59.79
1029	19:51:20	22.92	92.093	3.9	59.662
1030	19:51:30	23.016	91.438	3.9	59.534
1031	19:51:40	23.064	90.906	3.9	59.365
1032	19:51:50	23.112	90.372	3.9	59.154
1033	19:52:00	23.16	89.918	3.9	58.985
1034	19:52:10	23.208	89.409	11.8	58.776
1035	19:52:20	23.232	89.031	3.9	58.609
1036	19:52:30	23.256	88.651	3.9	58.443
1037	19:52:40	23.304	88.332	11.8	58.319
1038	19:52:50	23.328	87.951	3.9	58.196
1039	19:53:00	23.352	87.625	3.9	58.072
1040	19:53:10	23.376	87.299	3.9	57.99
1041	19:53:20	23.4	86.944	3.9	57.949
1042	19:53:30	23.4	85.637	3.9	57.908
1043	19:53:40	23.424	85.921	3.9	57.908
1044	19:53:50	23.424	85.81	3.9	57.867
1045	19:54:00	23.448	85.592	3.9	57.908
1046	19:54:10	23.472	85.43	3.9	57.908
1047	19:54:20	23.472	85.207	3.9	57.949
1048	19:54:30	23.472	84.983	3.9	57.99
1049	19:54:40	23.497	84.792	3.9	58.031
1050	19:54:50	23.497	84.232	11.8	58.072
1051	19:55:00	23.497	83.417	3.9	58.154
1052	19:55:10	23.521	83.76	3.9	58.196
1053	19:55:20	23.521	83.76	3.9	58.237
1054	19:55:30	23.521	83.619	3.9	58.319
1055	19:55:40	23.521	83.507	3.9	58.361
1056	19:55:50	23.545	83.287	3.9	58.443
1057	19:56:00	23.545	82.977	3.9	58.485
1058	19:56:10	23.545	82.129	3.9	58.526
1059	19:56:20	23.545	82.553	3.9	58.609
1060	19:56:30	23.545	82.61	3.9	58.693
1061	19:56:40	23.545	82.581	3.9	58.776
1062	19:56:50	23.569	82.474	3.9	58.86
1063	19:57:00	23.545	81.732	11.8	58.943
1064	19:57:10	23.569	82.106	3.9	59.069
1065	19:57:20	23.569	82.247	3.9	59.154
1066	19:57:30	23.569	81.454	3.9	59.238
1067	19:57:40	23.569	80.031	3.9	59.365
1068	19:57:50	23.569	79.717	3.9	59.492
1069	19:58:00	23.569	79.745	3.9	59.577
1070	19:58:10	23.569	79.459	3.9	59.705
1071	19:58:20	23.569	79.202	11.8	59.79
1072	19:58:30	23.569	78.887	3.9	59.876
1073	19:58:40	23.569	78.715	11.8	60.005
1074	19:58:50	23.569	79.116	3.9	60.134
1075	19:59:00	23.569	79.517	3.9	60.22
1076	19:59:10	23.569	79.717	3.9	60.35
1077	19:59:20	23.569	79.459	3.9	60.481
1078	19:59:30	23.569	79.144	3.9	60.568
1079	19:59:40	23.569	79.488	3.9	60.699
1080	19:59:50	23.569	79.574	3.9	60.83
1081	20:00:00	23.569	79.402	3.9	60.918
1082	20:00:10	23.569	79.517	3.9	61.006
1083	20:00:20	23.569	79.545	3.9	61.094
1084	20:00:30	23.569	79.545	11.8	61.138
1085	20:00:40	23.545	79.569	3.9	61.182
1086	20:00:50	23.569	79.574	3.9	61.227
1087	20:01:00	23.545	79.511	3.9	61.271
1088	20:01:10	23.569	79.459	3.9	61.36
1089	20:01:20	23.545	79.426	11.8	61.449
1090	20:01:30	23.545	79.397	3.9	61.493
1091	20:01:40	23.545	79.368	11.8	61.583
1092	20:01:50	23.545	79.368	3.9	61.627
1093	20:02:00	23.545	79.311	3.9	61.717
1094	20:02:10	23.545	79.283	3.9	61.762
1095	20:02:20	23.545	78.796	3.9	61.807
1096	20:02:30	23.545	77.991	3.9	61.897
1097	20:02:40	23.545	79.197	3.9	61.987
1098	20:02:50	23.545	79.54	3.9	62.077
1099	20:03:00	23.545	79.569	3.9	62.168
1100	20:03:10	23.569	79.545	3.9	62.258
1101	20:03:20	23.569	79.488	3.9	62.304
1102	20:03:30	23.569	79.402	3.9	62.349
1103	20:03:40	23.569	79.316	3.9	62.395
1104	20:03:50	23.569	79.202	3.9	62.441
1105	20:04:00	23.569	79.144	3.9	62.441
1106	20:04:10	23.569	79.03	3.9	62.486
1107	20:04:20	23.569	78.915	3.9	62.486
1108	20:04:30	23.569	78.887	3.9	62.486
1109	20:04:40	23.593	78.174	3.9	62.486
1110	20:04:50	23.593	78.116	3.9	62.486
1111	20:05:00	23.593	77.944	3.9	62.532
1112	20:05:10	23.593	78.116	3.9	62.532
1113	20:05:20	23.593	77.915	11.8	62.532
1114	20:05:30	23.593	77.944	3.9	62.532
1115	20:05:40	23.593	77.569	11.8	62.578
1116	20:05:50	23.593	77.454	11.8	62.578
1117	20:06:00	23.593	77.915	11.8	62.578
1118	20:06:10	23.593	77.915	11.8	62.578
1119	20:06:20	23.593	77.713	11.8	62.624
1120	20:06:30	23.593	77.512	3.9	62.624
1121	20:06:40	23.593	77.512	3.9	62.669
1122	20:06:50	23.593	77.541	11.8	62.669
1123	20:07:00	23.593	77.627	3.9	62.715
1124	20:07:10	23.593	77.396	3.9	62.761
1125	20:07:20	23.593	77.368	11.8	62.807
1126	20:07:30	23.593	77.368	3.9	62.853
1127	20:07:40	23.593	77.195	3.9	62.9
1128	20:07:50	23.593	77.195	3.9	62.992
1129	20:08:00	23.617	77.199	3.9	63.038
1130	20:08:10	23.617	77.286	11.8	63.085
1131	20:08:20	23.617	77.401	11.8	63.131
1132	20:08:30	23.617	77.344	11.8	63.131
1133	20:08:40	23.617	77.286	3.9	63.177
1134	20:08:50	23.617	77.43	11.8	63.224
1135	20:09:00	23.617	77.228	3.9	63.224
1136	20:09:10	23.617	77.055	11.8	63.271
1137	20:09:20	23.617	77.228	11.8	63.317
1138	20:09:30	23.617	77.286	3.9	63.317
1139	20:09:40	23.617	77.228	3.9	63.364
1140	20:09:50	23.617	77.286	3.9	63.411
1141	20:10:00	23.617	77.171	11.8	63.411
1142	20:10:10	23.617	77.228	11.8	63.457
1143	20:10:20	23.617	77.373	3.9	63.504
1144	20:10:30	23.641	77.493	3.9	63.551
1145	20:10:40	23.641	77.435	3.9	63.645
1146	20:10:50	23.641	77.32	11.8	63.692
1147	20:11:00	23.641	77.377	3.9	63.739
1148	20:11:10	23.641	77.579	3.9	63.786
1149	20:11:20	23.641	77.666	3.9	63.834
1150	20:11:30	23.641	77.695	3.9	63.834
1151	20:11:40	23.641	77.666	11.8	63.834
1152	20:11:50	23.665	77.642	3.9	63.834
1153	20:12:00	23.665	77.699	3.9	63.834
1154	20:12:10	23.665	77.728	3.9	63.834
1155	20:12:20	23.665	77.843	3.9	63.834
1156	20:12:30	23.665	77.872	3.9	63.834
1157	20:12:40	23.665	77.93	11.8	63.881
1158	20:12:50	23.689	77.935	11.8	63.834
1159	20:13:00	23.689	77.964	11.8	63.834
1160	20:13:10	23.689	78.021	3.9	63.834
1161	20:13:20	23.689	78.05	3.9	63.834
1162	20:13:30	23.689	78.079	3.9	63.881
1163	20:13:40	23.713	77.997	3.9	63.881
1164	20:13:50	23.713	78.084	3.9	63.834
1165	20:14:00	23.713	78.112	3.9	63.834
1166	20:14:10	23.713	78.199	11.8	63.834
1167	20:14:20	23.737	78.204	11.8	63.834
1168	20:14:30	23.737	78.29	11.8	63.834
1169	20:14:40	23.737	78.319	3.9	63.834
1170	20:14:50	23.737	78.405	11.8	63.834
1171	20:15:00	23.761	78.41	3.9	63.834
1172	20:15:10	23.761	78.439	11.8	63.834
1173	20:15:20	23.785	78.472	11.8	63.834
1174	20:15:30	23.785	78.472	11.8	63.834
1175	20:15:40	23.785	78.53	3.9	63.834
1176	20:15:50	23.785	78.472	3.9	63.834
1177	20:16:00	23.809	78.449	3.9	63.834
1178	20:16:10	23.809	78.506	11.8	63.834
1179	20:16:20	23.833	78.569	11.8	63.834
1180	20:16:30	23.833	78.597	11.8	63.834
1181	20:16:40	23.833	78.655	3.9	63.834
1182	20:16:50	23.833	78.655	3.9	63.834
1183	20:17:00	23.857	78.717	3.9	63.834
1184	20:17:10	23.857	78.717	3.9	63.834
1185	20:17:20	23.857	78.775	3.9	63.834
1186	20:17:30	23.881	78.837	3.9	63.834
1187	20:17:40	23.881	78.866	3.9	63.834
1188	20:17:50	23.905	78.957	3.9	63.834
1189	20:18:00	23.905	78.957	11.8	63.834
1190	20:18:10	23.905	78.957	3.9	63.834
1191	20:18:20	23.93	78.991	11.8	63.834
1192	20:18:30	23.93	79.019	11.8	63.834
1193	20:18:40	23.954	79.024	3.9	63.834
1194	20:18:50	23.954	79.082	11.8	63.834
1195	20:19:00	23.978	79.144	3.9	63.834
1196	20:19:10	23.978	79.173	3.9	63.834
1197	20:19:20	23.978	79.201	3.9	63.834
1198	20:19:30	24.002	79.235	3.9	63.786
1199	20:19:40	24.002	79.235	3.9	63.834
1200	20:19:50	24.026	79.211	3.9	63.834
1201	20:20:00	24.026	79.269	3.9	63.786
1202	20:20:10	24.05	79.274	3.9	63.786
1203	20:20:20	24.05	79.274	3.9	63.786
1204	20:20:30	24.074	79.279	3.9	63.834
1205	20:20:40	24.074	79.25	3.9	63.786
1206	20:20:50	24.074	79.222	3.9	63.786
1207	20:21:00	24.098	79.169	3.9	63.786
1208	20:21:10	24.098	79.169	11.8	63.786
1209	20:21:20	24.122	79.117	3.9	63.786
1210	20:21:30	24.122	79.088	3.9	63.786
1211	20:21:40	24.146	79.064	3.9	63.786
1212	20:21:50	24.146	79.036	3.9	63.786
1213	20:22:00	24.146	79.064	3.9	63.786
1214	20:22:10	24.171	79.07	3.9	63.786
1215	20:22:20	24.171	79.07	3.9	63.786
1216	20:22:30	24.171	79.07	3.9	63.786
1217	20:22:40	24.195	79.075	3.9	63.786
1218	20:22:50	24.195	79.017	11.8	63.786
1219	20:23:00	24.219	78.965	3.9	63.786
1220	20:23:10	24.219	78.879	3.9	63.786
1221	20:23:20	24.219	78.792	3.9	63.786
1222	20:23:30	24.219	78.677	3.9	63.786
1223	20:23:40	24.243	78.51	3.9	63.834
1224	20:23:50	24.243	78.452	3.9	63.834
1225	20:24:00	24.243	78.366	3.9	63.834
1226	20:24:10	24.267	78.457	11.8	63.834
1227	20:24:20	24.267	78.515	3.9	63.834
1228	20:24:30	24.267	78.543	3.9	63.834
1229	20:24:40	24.291	78.462	3.9	63.834
1230	20:24:50	24.291	78.462	3.9	63.834
1231	20:25:00	24.291	78.548	3.9	63.834
1232	20:25:10	24.291	78.577	3.9	63.834
1233	20:25:20	24.291	78.577	3.9	63.834
1234	20:25:30	24.315	78.582	3.9	63.834
1235	20:25:40	24.315	78.553	3.9	63.834
1236	20:25:50	24.315	78.553	3.9	63.834
1237	20:26:00	24.315	78.525	3.9	63.834
1238	20:26:10	24.339	78.53	3.9	63.834
1239	20:26:20	24.339	78.501	11.8	63.834
1240	20:26:30	24.339	78.472	3.9	63.834
1241	20:26:40	24.339	78.472	11.8	63.834
1242	20:26:50	24.339	78.443	3.9	63.834
1243	20:27:00	24.363	78.448	3.9	63.834
1244	20:27:10	24.363	78.419	11.8	63.834
1245	20:27:20	24.363	78.419	3.9	63.834
1246	20:27:30	24.388	78.424	3.9	63.834
1247	20:27:40	24.388	78.396	3.9	63.834
1248	20:27:50	24.388	78.223	3.9	63.834
1249	20:28:00	24.388	78.367	3.9	63.834
1250	20:28:10	24.388	78.453	3.9	63.881
1251	20:28:20	24.412	78.487	3.9	63.834
1252	20:28:30	24.412	78.487	3.9	63.881
1253	20:28:40	24.412	78.458	11.8	63.881
1254	20:28:50	24.436	78.434	11.8	63.881
1255	20:29:00	24.436	78.406	3.9	63.881
1256	20:29:10	24.46	78.382	3.9	63.881
1257	20:29:20	24.46	78.353	3.9	63.881
1258	20:29:30	24.46	78.324	3.9	63.881
1259	20:29:40	24.46	78.295	3.9	63.881
1260	20:29:50	24.484	78.271	3.9	63.881
1261	20:30:00	24.484	78.271	11.8	63.881
1262	20:30:10	24.484	78.243	3.9	63.881
1263	20:30:20	24.484	78.214	11.8	63.881
1264	20:30:30	24.508	78.219	11.8	63.881
1265	20:30:40	24.508	78.19	11.8	63.881
1266	20:30:50	24.508	78.161	3.9	63.881
1267	20:31:00	24.508	78.161	3.9	63.881
1268	20:31:10	24.508	78.132	3.9	63.881
1269	20:31:20	24.508	78.103	11.8	63.881
1270	20:31:30	24.532	78.108	3.9	63.881
1271	20:31:40	24.532	78.051	3.9	63.881
1272	20:31:50	24.532	78.051	11.8	63.881
1273	20:32:00	24.532	78.051	11.8	63.881
1274	20:32:10	24.532	78.022	11.8	63.881
1275	20:32:20	24.557	78.027	11.8	63.881
1276	20:32:30	24.557	77.998	11.8	63.881
1277	20:32:40	24.557	77.969	11.8	63.881
1278	20:32:50	24.557	77.969	3.9	63.881
1279	20:33:00	24.557	77.969	11.8	63.881
1280	20:33:10	24.557	77.969	3.9	63.881
1281	20:33:20	24.557	77.94	3.9	63.881
1282	20:33:30	24.581	77.916	3.9	63.928
1283	20:33:40	24.581	77.887	11.8	63.881
1284	20:33:50	24.581	77.887	11.8	63.928
1285	20:34:00	24.581	77.887	3.9	63.881
1286	20:34:10	24.581	77.858	3.9	63.881
1287	20:34:20	24.581	77.858	3.9	63.881
1288	20:34:30	24.605	77.835	3.9	63.881
1289	20:34:40	24.605	77.835	3.9	63.881
1290	20:34:50	24.605	77.806	3.9	63.928
1291	20:35:00	24.605	77.806	3.9	63.928
1292	20:35:10	24.605	77.806	3.9	63.928
1293	20:35:20	24.605	77.777	3.9	63.928
1294	20:35:30	24.605	77.777	3.9	63.928
1295	20:35:40	24.605	77.777	11.8	63.928
1296	20:35:50	24.605	77.748	3.9	63.928
1297	20:36:00	24.605	77.719	11.8	63.928
1298	20:36:10	24.605	77.719	3.9	63.928
1299	20:36:20	24.629	77.666	11.8	63.928
1300	20:36:30	24.629	77.724	11.8	63.928
1301	20:36:40	24.629	77.695	3.9	63.928
1302	20:36:50	24.629	77.521	3.9	63.928
1303	20:37:00	24.629	77.493	3.9	63.928
1304	20:37:10	24.629	77.464	3.9	63.928
1305	20:37:20	24.629	77.464	3.9	63.928
1306	20:37:30	24.629	77.464	11.8	63.928
1307	20:37:40	24.629	77.435	11.8	63.928
1308	20:37:50	24.629	77.464	11.8	63.928
1309	20:38:00	24.629	77.464	3.9	63.928
1310	20:38:10	24.629	77.464	3.9	63.928
1311	20:38:20	24.629	77.435	11.8	63.928
1312	20:38:30	24.629	77.435	3.9	63.928
1313	20:38:40	24.653	77.468	3.9	63.928
1314	20:38:50	24.629	77.377	3.9	63.928
1315	20:39:00	24.653	77.44	11.8	63.928
1316	20:39:10	24.629	77.464	11.8	63.928
1317	20:39:20	24.653	77.44	11.8	63.928
1318	20:39:30	24.653	77.468	11.8	63.928
1319	20:39:40	24.653	77.468	3.9	63.928
1320	20:39:50	24.653	77.468	3.9	63.928
1321	20:40:00	24.653	77.468	3.9	63.928
1322	20:40:10	24.653	77.497	11.8	63.928
1323	20:40:20	24.653	77.497	11.8	63.928
1324	20:40:30	24.653	77.497	11.8	63.928
1325	20:40:40	24.653	77.497	3.9	63.928
1326	20:40:50	24.677	77.502	11.8	63.928
1327	20:41:00	24.653	77.497	11.8	63.928
1328	20:41:10	24.677	77.502	11.8	63.928
1329	20:41:20	24.677	77.502	3.9	63.928
1330	20:41:30	24.677	77.502	11.8	63.976
1331	20:41:40	24.677	77.502	3.9	63.976
1332	20:41:50	24.677	77.531	3.9	63.976
1333	20:42:00	24.677	77.502	3.9	63.928
1334	20:42:10	24.677	77.531	3.9	63.928
1335	20:42:20	24.677	77.502	11.8	63.928
1336	20:42:30	24.702	77.507	3.9	63.928
1337	20:42:40	24.702	77.536	3.9	63.928
1338	20:42:50	24.702	77.507	3.9	63.928
1339	20:43:00	24.702	77.507	3.9	63.928
1340	20:43:10	24.702	77.507	3.9	63.928
1341	20:43:20	24.702	77.507	3.9	63.928
1342	20:43:30	24.702	77.507	3.9	63.976
1343	20:43:40	24.702	77.507	11.8	63.976
1344	20:43:50	24.702	77.507	11.8	63.928
1345	20:44:00	24.726	77.512	11.8	63.928
1346	20:44:10	24.726	77.483	3.9	63.976
1347	20:44:20	24.726	77.483	11.8	63.976
1348	20:44:30	24.726	77.483	3.9	63.976
1349	20:44:40	24.726	77.483	3.9	63.976
1350	20:44:50	24.726	77.483	3.9	63.976
1351	20:45:00	24.726	77.483	3.9	63.976
1352	20:45:10	24.75	77.459	3.9	63.976
1353	20:45:20	24.75	77.459	11.8	63.976
1354	20:45:30	24.75	77.459	11.8	63.976
1355	20:45:40	24.75	77.459	3.9	63.976
1356	20:45:50	24.75	77.459	3.9	63.976
1357	20:46:00	24.75	77.43	11.8	63.976
1358	20:46:10	24.75	77.459	3.9	63.976
1359	20:46:20	24.75	77.459	3.9	63.976
1360	20:46:30	24.75	77.43	3.9	63.976
1361	20:46:40	24.774	77.406	11.8	63.976
1362	20:46:50	24.774	77.435	11.8	63.976
1363	20:47:00	24.774	77.406	3.9	63.976
1364	20:47:10	24.774	77.406	3.9	63.976
1365	20:47:20	24.774	77.406	3.9	63.976
1366	20:47:30	24.774	77.406	3.9	63.976
1367	20:47:40	24.774	77.406	3.9	63.976
1368	20:47:50	24.798	77.382	3.9	63.976
1369	20:48:00	24.798	77.382	3.9	63.976
1370	20:48:10	24.798	77.382	11.8	63.976
1371	20:48:20	24.798	77.353	11.8	63.976
1372	20:48:30	24.798	77.353	3.9	63.976
1373	20:48:40	24.798	77.353	3.9	63.976
1374	20:48:50	24.798	77.353	3.9	63.976
1375	20:49:00	24.798	77.353	11.8	63.976
1376	20:49:10	24.798	77.353	3.9	63.976
1377	20:49:20	24.798	77.324	3.9	63.976
1378	20:49:30	24.823	77.329	3.9	63.976
1379	20:49:40	24.823	77.3	3.9	63.976
1380	20:49:50	24.823	77.3	3.9	63.976
1381	20:50:00	24.823	77.3	3.9	63.976
1382	20:50:10	24.823	77.3	3.9	63.976
1383	20:50:20	24.823	77.3	3.9	63.976
1384	20:50:30	24.823	77.3	3.9	63.976
1385	20:50:40	24.823	77.271	11.8	63.976
1386	20:50:50	24.823	77.271	3.9	63.976
1387	20:51:00	24.847	77.276	11.8	63.976
1388	20:51:10	24.847	77.276	3.9	63.976
1389	20:51:20	24.847	77.276	3.9	63.976
1390	20:51:30	24.847	77.247	3.9	63.976
1391	20:51:40	24.847	77.247	3.9	63.976
1392	20:51:50	24.847	77.247	3.9	63.976
1393	20:52:00	24.847	77.247	3.9	63.976
1394	20:52:10	24.847	77.247	3.9	63.976
1395	20:52:20	24.847	77.247	11.8	63.976
1396	20:52:30	24.871	77.223	3.9	63.976
1397	20:52:40	24.871	77.223	11.8	63.976
1398	20:52:50	24.871	77.223	11.8	63.976
1399	20:53:00	24.871	77.223	3.9	63.976
1400	20:53:10	24.871	77.223	3.9	63.976
1401	20:53:20	24.871	77.223	3.9	63.976
1402	20:53:30	24.871	77.194	3.9	63.976
1403	20:53:40	24.871	77.194	3.9	63.976
1404	20:53:50	24.871	77.194	3.9	63.976
1405	20:54:00	24.895	77.199	3.9	63.976
1406	20:54:10	24.871	77.165	3.9	63.976
1407	20:54:20	24.895	77.199	3.9	63.976
1408	20:54:30	24.895	77.17	3.9	63.976
1409	20:54:40	24.895	77.17	3.9	63.976
1410	20:54:50	24.895	77.17	3.9	63.976
1411	20:55:00	24.895	77.141	3.9	63.976
1412	20:55:10	24.895	77.141	3.9	63.976
1413	20:55:20	24.895	77.141	11.8	63.976
1414	20:55:30	24.895	77.141	3.9	63.976
1415	20:55:40	24.895	77.141	3.9	63.976
1416	20:55:50	24.895	77.112	11.8	63.976
1417	20:56:00	24.919	77.117	3.9	63.976
1418	20:56:10	24.919	77.117	3.9	63.976
1419	20:56:20	24.919	77.117	3.9	63.976
1420	20:56:30	24.919	77.088	3.9	63.976
1421	20:56:40	24.919	77.088	11.8	63.976
1422	20:56:50	24.919	77.088	3.9	63.976
1423	20:57:00	24.919	77.088	3.9	63.976
1424	20:57:10	24.919	77.088	3.9	63.976
1425	20:57:20	24.919	77.088	3.9	64.023
1426	20:57:30	24.919	77.059	3.9	63.976
1427	20:57:40	24.919	77.088	11.8	63.976
1428	20:57:50	24.944	77.064	3.9	63.976
1429	20:58:00	24.944	77.064	3.9	64.023
1430	20:58:10	24.944	77.064	3.9	64.023
1431	20:58:20	24.944	77.035	3.9	64.023
1432	20:58:30	24.944	77.035	3.9	64.023
1433	20:58:40	24.944	77.035	3.9	63.976
1434	20:58:50	24.944	77.035	3.9	63.976
1435	20:59:00	24.944	77.035	11.8	63.976
1436	20:59:10	24.944	77.035	3.9	63.976
1437	20:59:20	24.944	77.035	3.9	63.976
1438	20:59:30	24.968	77.04	3.9	64.023
1439	20:59:40	24.944	77.006	3.9	64.023
1440	20:59:50	24.968	77.011	3.9	63.976
1441	21:00:00	24.968	76.982	3.9	63.976
1442	21:00:10	24.968	76.982	3.9	64.023
1443	21:00:20	24.968	76.982	11.8	63.976
1444	21:00:30	24.968	77.011	11.8	63.976
1445	21:00:40	24.968	76.982	3.9	64.023
1446	21:00:50	24.992	76.987	3.9	64.023
1447	21:01:00	24.992	76.987	11.8	63.976
1448	21:01:10	24.992	76.958	3.9	64.023
1449	21:01:20	24.992	76.958	3.9	63.976
1450	21:01:30	24.992	76.958	3.9	64.023
1451	21:01:40	24.992	76.929	3.9	64.023
1452	21:01:50	24.992	76.929	3.9	64.023
1453	21:02:00	24.992	76.929	11.8	64.023
1454	21:02:10	25.016	76.933	11.8	64.023
1455	21:02:20	25.016	76.933	3.9	64.023
1456	21:02:30	25.016	76.933	3.9	64.023
1457	21:02:40	25.016	76.933	3.9	64.023
1458	21:02:50	25.016	76.933	3.9	64.023
1459	21:03:00	25.016	76.904	3.9	64.023
1460	21:03:10	25.016	76.904	3.9	64.023
1461	21:03:20	25.016	76.904	3.9	64.023
1462	21:03:30	25.016	76.875	3.9	64.023
1463	21:03:40	25.016	76.875	3.9	64.023
1464	21:03:50	25.016	76.875	3.9	64.023
1465	21:04:00	25.04	76.88	3.9	64.023
1466	21:04:10	25.04	76.88	3.9	64.023
1467	21:04:20	25.04	76.851	3.9	64.023
1468	21:04:30	25.04	76.88	3.9	64.023
1469	21:04:40	25.04	76.851	3.9	64.023
1470	21:04:50	25.04	76.851	3.9	64.023
1471	21:05:00	25.04	76.851	3.9	64.023
1472	21:05:10	25.04	76.822	3.9	64.023
1473	21:05:20	25.04	76.822	3.9	64.023
1474	21:05:30	25.04	76.822	3.9	64.023
1475	21:05:40	25.04	76.822	3.9	64.023
1476	21:05:50	25.04	76.822	3.9	64.023
1477	21:06:00	25.04	76.793	3.9	64.023
1478	21:06:10	25.04	76.793	3.9	64.023
1479	21:06:20	25.04	76.793	11.8	64.023
1480	21:06:30	25.04	76.793	3.9	64.023
1481	21:06:40	25.065	76.798	3.9	64.023
1482	21:06:50	25.065	76.769	3.9	64.023
1483	21:07:00	25.065	76.769	11.8	64.023
1484	21:07:10	25.065	76.769	3.9	64.023
1485	21:07:20	25.065	76.769	11.8	64.023
1486	21:07:30	25.065	76.74	3.9	64.023
1487	21:07:40	25.065	76.74	3.9	64.023
1488	21:07:50	25.065	76.74	3.9	64.023
1489	21:08:00	25.065	76.74	3.9	64.023
1490	21:08:10	25.065	76.711	3.9	64.023
1491	21:08:20	25.065	76.711	3.9	64.023
1492	21:08:30	25.065	76.711	3.9	64.023
1493	21:08:40	25.065	76.711	3.9	64.023
1494	21:08:50	25.065	76.711	3.9	64.023
1495	21:09:00	25.065	76.711	3.9	64.07
1496	21:09:10	25.089	76.687	3.9	64.07
1497	21:09:20	25.089	76.687	3.9	64.07
1498	21:09:30	25.089	76.687	3.9	64.07
1499	21:09:40	25.089	76.658	3.9	64.07
1500	21:09:50	25.089	76.687	3.9	64.07
1501	21:10:00	25.089	76.658	3.9	64.07
1502	21:10:10	25.089	76.687	3.9	64.118
1503	21:10:20	25.089	76.658	3.9	64.118
1504	21:10:30	25.089	76.658	3.9	64.166
1505	21:10:40	25.089	76.629	3.9	64.166
1506	21:10:50	25.089	76.658	11.8	64.166
1507	21:11:00	25.089	76.629	3.9	64.213
1508	21:11:10	25.089	76.658	3.9	64.213
1509	21:11:20	25.089	76.629	3.9	64.261
1510	21:11:30	25.089	76.629	3.9	64.309
1511	21:11:40	25.089	76.599	3.9	64.357
1512	21:11:50	25.113	76.633	3.9	64.405
1513	21:12:00	25.089	76.599	3.9	64.405
1514	21:12:10	25.113	76.604	3.9	64.453
1515	21:12:20	25.113	76.604	3.9	64.501
1516	21:12:30	25.113	76.604	3.9	64.549
1517	21:12:40	25.113	76.604	11.8	64.597
1518	21:12:50	25.113	76.575	3.9	64.597
1519	21:13:00	25.113	76.575	3.9	64.645
1520	21:13:10	25.113	76.575	3.9	64.645
1521	21:13:20	25.113	76.575	3.9	64.693
1522	21:13:30	25.113	76.546	3.9	64.693
1523	21:13:40	25.113	76.546	3.9	64.693
1524	21:13:50	25.113	76.546	3.9	64.693
1525	21:14:00	25.113	76.546	11.8	64.693
1526	21:14:10	25.113	76.517	3.9	64.693
1527	21:14:20	25.113	76.517	3.9	64.693
1528	21:14:30	25.113	76.517	3.9	64.741
1529	21:14:40	25.113	76.517	3.9	64.741
1530	21:14:50	25.113	76.517	3.9	64.741
1531	21:15:00	25.113	76.517	3.9	64.741
1532	21:15:10	25.113	76.488	3.9	64.741
1533	21:15:20	25.137	76.493	3.9	64.741
1534	21:15:30	25.137	76.493	3.9	64.741
1535	21:15:40	25.137	76.493	3.9	64.741
1536	21:15:50	25.137	76.493	3.9	64.741
1537	21:16:00	25.137	76.493	3.9	64.741
1538	21:16:10	25.137	76.493	11.8	64.741
1539	21:16:20	25.137	76.464	3.9	64.741
1540	21:16:30	25.137	76.464	3.9	64.741
1541	21:16:40	25.137	76.464	3.9	64.741
1542	21:16:50	25.137	76.435	3.9	64.741
1543	21:17:00	25.137	76.464	3.9	64.79
1544	21:17:10	25.137	76.464	11.8	64.741
1545	21:17:20	25.137	76.435	11.8	64.79
1546	21:17:30	25.137	76.435	3.9	64.79
1547	21:17:40	25.137	76.435	3.9	64.741
1548	21:17:50	25.137	76.435	11.8	64.741
1549	21:18:00	25.137	76.435	3.9	64.741
1550	21:18:10	25.137	76.435	3.9	64.741
1551	21:18:20	25.137	76.435	3.9	64.741
1552	21:18:30	25.137	76.435	3.9	64.79
1553	21:18:40	25.137	76.406	3.9	64.79
1554	21:18:50	25.137	76.406	3.9	64.79
1555	21:19:00	25.162	76.41	3.9	64.79
1556	21:19:10	25.162	76.41	3.9	64.79
1557	21:19:20	25.162	76.41	3.9	64.79
1558	21:19:30	25.162	76.41	3.9	64.79
1559	21:19:40	25.162	76.381	3.9	64.79
1560	21:19:50	25.162	76.381	3.9	64.79
1561	21:20:00	25.162	76.381	3.9	64.79
1562	21:20:10	25.162	76.381	3.9	64.79
1563	21:20:20	25.162	76.352	3.9	64.79
1564	21:20:30	25.162	76.352	3.9	64.79
1565	21:20:40	25.162	76.352	3.9	64.79
1566	21:20:50	25.162	76.352	3.9	64.838
1567	21:21:00	25.162	76.352	3.9	64.838
1568	21:21:10	25.162	76.352	3.9	64.838
1569	21:21:20	25.162	76.323	3.9	64.838
1570	21:21:30	25.162	76.323	3.9	64.838
1571	21:21:40	25.162	76.323	3.9	64.838
1572	21:21:50	25.162	76.323	3.9	64.887
1573	21:22:00	25.162	76.323	3.9	64.887
1574	21:22:10	25.162	76.323	11.8	64.887
1575	21:22:20	25.186	76.299	3.9	64.935
1576	21:22:30	25.162	76.294	3.9	64.935
1577	21:22:40	25.162	76.294	3.9	64.984
1578	21:22:50	25.162	76.294	3.9	65.033
1579	21:23:00	25.186	76.299	3.9	65.033
1580	21:23:10	25.186	76.27	3.9	65.081
1581	21:23:20	25.186	76.27	3.9	65.13
1582	21:23:30	25.186	76.27	11.8	65.179
1583	21:23:40	25.186	76.27	3.9	65.228
1584	21:23:50	25.186	76.27	3.9	65.277
1585	21:24:00	25.186	76.27	3.9	65.326
1586	21:24:10	25.186	76.241	3.9	65.326
1587	21:24:20	25.186	76.241	3.9	65.326
1588	21:24:30	25.186	76.241	11.8	65.375
1589	21:24:40	25.186	76.241	3.9	65.375
1590	21:24:50	25.186	76.241	3.9	65.326
1591	21:25:00	25.186	76.211	3.9	65.375
1592	21:25:10	25.186	76.211	11.8	65.375
1593	21:25:20	25.186	76.241	3.9	65.375
1594	21:25:30	25.186	76.211	3.9	65.375
1595	21:25:40	25.186	76.211	3.9	65.375
1596	21:25:50	25.186	76.211	3.9	65.375
1597	21:26:00	25.186	76.211	3.9	65.375
1598	21:26:10	25.186	76.182	3.9	65.375
1599	21:26:20	25.186	76.182	11.8	65.375
1600	21:26:30	25.186	76.182	3.9	65.326
1601	21:26:40	25.186	76.182	3.9	65.375
1602	21:26:50	25.21	76.187	11.8	65.326
1603	21:27:00	25.186	76.182	3.9	65.375
1604	21:27:10	25.186	76.182	3.9	65.375
1605	21:27:20	25.21	76.158	3.9	65.375
1606	21:27:30	25.186	76.153	3.9	65.375
1607	21:27:40	25.21	76.158	3.9	65.375
1608	21:27:50	25.186	76.153	3.9	65.375
1609	21:28:00	25.186	76.153	3.9	65.375
1610	21:28:10	25.186	76.153	11.8	65.375
1611	21:28:20	25.186	76.153	3.9	65.375
1612	21:28:30	25.21	76.158	3.9	65.375
1613	21:28:40	25.21	76.129	3.9	65.375
1614	21:28:50	25.21	76.158	3.9	65.375
1615	21:29:00	25.21	76.129	3.9	65.375
1616	21:29:10	25.21	76.129	3.9	65.375
1617	21:29:20	25.21	76.129	3.9	65.375
1618	21:29:30	25.21	76.129	3.9	65.375
1619	21:29:40	25.21	76.1	3.9	65.375
1620	21:29:50	25.21	76.1	3.9	65.375
1621	21:30:00	25.21	76.1	3.9	65.375
1622	21:30:10	25.21	76.1	11.8	65.375
1623	21:30:20	25.21	76.1	3.9	65.375
1624	21:30:30	25.21	76.1	3.9	65.375
1625	21:30:40	25.21	76.071	3.9	65.375
1626	21:30:50	25.21	76.071	3.9	65.375
1627	21:31:00	25.21	76.071	3.9	65.375
1628	21:31:10	25.21	76.071	3.9	65.375
1629	21:31:20	25.21	76.071	3.9	65.375
1630	21:31:30	25.21	76.071	3.9	65.375
1631	21:31:40	25.21	76.042	11.8	65.375
1632	21:31:50	25.21	76.071	3.9	65.375
1633	21:32:00	25.21	76.042	3.9	65.375
1634	21:32:10	25.21	76.042	3.9	65.375
1635	21:32:20	25.21	76.042	3.9	65.375
1636	21:32:30	25.21	76.042	3.9	65.375
1637	21:32:40	25.21	76.042	3.9	65.375
1638	21:32:50	25.21	76.042	3.9	65.375
1639	21:33:00	25.21	76.042	3.9	65.375
1640	21:33:10	25.21	76.042	11.8	65.375
1641	21:33:20	25.234	76.017	11.8	65.375
1642	21:33:30	25.234	76.017	3.9	65.375
1643	21:33:40	25.234	75.988	3.9	65.375
1644	21:33:50	25.234	75.988	11.8	65.375
1645	21:34:00	25.234	75.988	11.8	65.375
1646	21:34:10	25.234	75.988	11.8	65.375
1647	21:34:20	25.234	76.017	3.9	65.375
1648	21:34:30	25.234	75.988	3.9	65.375
1649	21:34:40	25.234	75.988	3.9	65.375
1650	21:34:50	25.234	75.988	3.9	65.375
1651	21:35:00	25.234	75.988	3.9	65.375
1652	21:35:10	25.234	75.988	3.9	65.375
1653	21:35:20	25.234	75.988	3.9	65.375
1654	21:35:30	25.234	75.988	3.9	65.375
1655	21:35:40	25.234	75.959	3.9	65.375
1656	21:35:50	25.234	75.959	3.9	65.375
1657	21:36:00	25.234	75.988	3.9	65.375
1658	21:36:10	25.234	75.988	3.9	65.375
1659	21:36:20	25.234	75.959	3.9	65.375
1660	21:36:30	25.234	75.959	3.9	65.375
1661	21:36:40	25.234	75.959	3.9	65.375
1662	21:36:50	25.234	75.959	3.9	65.375
1663	21:37:00	25.234	75.93	3.9	65.375
1664	21:37:10	25.234	75.93	3.9	65.375
1665	21:37:20	25.234	75.93	3.9	65.375
1666	21:37:30	25.234	75.93	3.9	65.375
1667	21:37:40	25.234	75.93	3.9	65.375
1668	21:37:50	25.234	75.93	3.9	65.375
1669	21:38:00	25.234	75.901	3.9	65.375
1670	21:38:10	25.234	75.93	3.9	65.375
1671	21:38:20	25.234	75.901	3.9	65.375
1672	21:38:30	25.234	75.93	3.9	65.375
1673	21:38:40	25.234	75.901	3.9	65.375
1674	21:38:50	25.234	75.901	3.9	65.375
1675	21:39:00	25.234	75.901	3.9	65.375
1676	21:39:10	25.258	75.905	3.9	65.375
1677	21:39:20	25.234	75.901	3.9	65.375
1678	21:39:30	25.234	75.871	3.9	65.375
1679	21:39:40	25.234	75.871	3.9	65.375
1680	21:39:50	25.234	75.871	3.9	65.375
1681	21:40:00	25.234	75.871	3.9	65.375
1682	21:40:10	25.234	75.871	3.9	65.375
1683	21:40:20	25.258	75.876	3.9	65.375
1684	21:40:30	25.234	75.871	3.9	65.375
1685	21:40:40	25.258	75.876	3.9	65.375
1686	21:40:50	25.258	75.876	3.9	65.375
1687	21:41:00	25.258	75.847	3.9	65.375
1688	21:41:10	25.234	75.842	3.9	65.375
1689	21:41:20	25.258	75.847	3.9	65.375
1690	21:41:30	25.258	75.818	3.9	65.375
1691	21:41:40	25.258	75.847	3.9	65.375
1692	21:41:50	25.258	75.847	3.9	65.375
1693	21:42:00	25.258	75.818	3.9	65.375
1694	21:42:10	25.258	75.847	3.9	65.375
1695	21:42:20	25.258	75.818	3.9	65.375
1696	21:42:30	25.258	75.818	11.8	65.375
1697	21:42:40	25.258	75.789	3.9	65.375
1698	21:42:50	25.258	75.818	3.9	65.375
1699	21:43:00	25.258	75.818	3.9	65.375
1700	21:43:10	25.258	75.789	3.9	65.375
1701	21:43:20	25.258	75.789	3.9	65.375
1702	21:43:30	25.258	75.789	3.9	65.375
1703	21:43:40	25.258	75.789	3.9	65.375
1704	21:43:50	25.258	75.818	3.9	65.375
1705	21:44:00	25.258	75.789	3.9	65.375
1706	21:44:10	25.258	75.759	3.9	65.375
1707	21:44:20	25.258	75.759	11.8	65.375
1708	21:44:30	25.258	75.759	3.9	65.375
1709	21:44:40	25.258	75.759	3.9	65.375
1710	21:44:50	25.258	75.759	3.9	65.375
1711	21:45:00	25.258	75.759	3.9	65.375
1712	21:45:10	25.258	75.759	3.9	65.375
1713	21:45:20	25.258	75.759	11.8	65.375
1714	21:45:30	25.258	75.759	3.9	65.375
1715	21:45:40	25.258	75.759	11.8	65.375
1716	21:45:50	25.258	75.759	3.9	65.375
1717	21:46:00	25.258	75.759	3.9	65.375
1718	21:46:10	25.258	75.759	3.9	65.375
1719	21:46:20	25.258	75.759	3.9	65.375
1720	21:46:30	25.258	75.73	3.9	65.375
1721	21:46:40	25.258	75.73	3.9	65.375
1722	21:46:50	25.258	75.73	3.9	65.375
1723	21:47:00	25.258	75.73	3.9	65.375
1724	21:47:10	25.283	75.735	3.9	65.375
1725	21:47:20	25.258	75.701	3.9	65.375
1726	21:47:30	25.258	75.701	11.8	65.375
1727	21:47:40	25.258	75.701	3.9	65.375
1728	21:47:50	25.258	75.701	3.9	65.375
1729	21:48:00	25.283	75.735	3.9	65.375
1730	21:48:10	25.258	75.701	3.9	65.375
1731	21:48:20	25.283	75.706	3.9	65.375
1732	21:48:30	25.283	75.706	3.9	65.375
1733	21:48:40	25.283	75.706	3.9	65.375
1734	21:48:50	25.283	75.706	3.9	65.375
1735	21:49:00	25.283	75.706	3.9	65.375
1736	21:49:10	25.283	75.706	3.9	65.375
1737	21:49:20	25.283	75.677	3.9	65.375
1738	21:49:30	25.283	75.677	3.9	65.375
1739	21:49:40	25.283	75.706	3.9	65.375
1740	21:49:50	25.283	75.677	3.9	65.375
1741	21:50:00	25.283	75.706	3.9	65.375
1742	21:50:10	25.283	75.677	3.9	65.375
1743	21:50:20	25.283	75.677	3.9	65.375
1744	21:50:30	25.283	75.677	3.9	65.375
1745	21:50:40	25.283	75.648	3.9	65.424
1746	21:50:50	25.283	75.648	3.9	65.375
1747	21:51:00	25.283	75.648	3.9	65.375
1748	21:51:10	25.283	75.648	11.8	65.375
1749	21:51:20	25.283	75.648	3.9	65.375
1750	21:51:30	25.283	75.648	11.8	65.375
1751	21:51:40	25.283	75.648	11.8	65.375
1752	21:51:50	25.283	75.648	3.9	65.375
1753	21:52:00	25.283	75.648	3.9	65.375
1754	21:52:10	25.283	75.648	3.9	65.375
1755	21:52:20	25.283	75.648	3.9	65.375
1756	21:52:30	25.283	75.648	11.8	65.375
1757	21:52:40	25.283	75.618	3.9	65.375
1758	21:52:50	25.283	75.618	3.9	65.375
1759	21:53:00	25.283	75.618	11.8	65.375
1760	21:53:10	25.283	75.618	3.9	65.375
1761	21:53:20	25.283	75.648	3.9	65.375
1762	21:53:30	25.283	75.618	3.9	65.375
1763	21:53:40	25.283	75.618	11.8	65.375
1764	21:53:50	25.283	75.618	11.8	65.375
1765	21:54:00	25.283	75.618	11.8	65.375
1766	21:54:10	25.283	75.589	3.9	65.375
1767	21:54:20	25.283	75.618	3.9	65.424
1768	21:54:30	25.283	75.589	3.9	65.375
1769	21:54:40	25.283	75.589	3.9	65.375
1770	21:54:50	25.283	75.589	3.9	65.375
1771	21:55:00	25.283	75.589	3.9	65.375
1772	21:55:10	25.283	75.589	3.9	65.375
1773	21:55:20	25.283	75.589	3.9	65.375
1774	21:55:30	25.283	75.56	3.9	65.424
1775	21:55:40	25.283	75.589	3.9	65.375
1776	21:55:50	25.283	75.56	11.8	65.424
1777	21:56:00	25.283	75.589	3.9	65.375
1778	21:56:10	25.307	75.565	3.9	65.424
1779	21:56:20	25.283	75.56	3.9	65.424
1780	21:56:30	25.283	75.56	3.9	65.375
1781	21:56:40	25.283	75.56	3.9	65.375
1782	21:56:50	25.283	75.531	3.9	65.424
1783	21:57:00	25.283	75.531	3.9	65.375
1784	21:57:10	25.307	75.565	3.9	65.375
1785	21:57:20	25.283	75.531	3.9	65.375
1786	21:57:30	25.307	75.535	3.9	65.375
1787	21:57:40	25.283	75.531	3.9	65.424
1788	21:57:50	25.307	75.535	3.9	65.375
1789	21:58:00	25.283	75.531	3.9	65.424
1790	21:58:10	25.307	75.535	3.9	65.424
1791	21:58:20	25.307	75.535	3.9	65.424
1792	21:58:30	25.283	75.531	3.9	65.375
1793	21:58:40	25.307	75.506	3.9	65.375
1794	21:58:50	25.307	75.506	3.9	65.375
1795	21:59:00	25.283	75.501	3.9	65.375
1796	21:59:10	25.307	75.506	3.9	65.375
1797	21:59:20	25.307	75.506	3.9	65.375
1798	21:59:30	25.307	75.506	3.9	65.424
1799	21:59:40	25.307	75.506	11.8	65.375
1800	21:59:50	25.307	75.477	3.9	65.375
1801	22:00:00	25.307	75.506	3.9	65.375
1802	22:00:10	25.307	75.506	3.9	65.375
1803	22:00:20	25.307	75.477	3.9	65.375
1804	22:00:30	25.307	75.477	3.9	65.375
1805	22:00:40	25.307	75.477	3.9	65.424
1806	22:00:50	25.307	75.477	3.9	65.424
1807	22:01:00	25.307	75.477	11.8	65.424
1808	22:01:10	25.307	75.477	11.8	65.375
1809	22:01:20	25.307	75.477	3.9	65.375
1810	22:01:30	25.307	75.477	3.9	65.424
1811	22:01:40	25.307	75.477	3.9	65.424
1812	22:01:50	25.307	75.477	3.9	65.424
1813	22:02:00	25.307	75.448	11.8	65.424
1814	22:02:10	25.307	75.448	11.8	65.424
1815	22:02:20	25.307	75.448	3.9	65.424
1816	22:02:30	25.307	75.477	3.9	65.424
1817	22:02:40	25.307	75.448	11.8	65.375
1818	22:02:50	25.307	75.448	3.9	65.424
1819	22:03:00	25.307	75.419	3.9	65.424
1820	22:03:10	25.307	75.419	3.9	65.424
1821	22:03:20	25.307	75.448	3.9	65.424
1822	22:03:30	25.307	75.419	3.9	65.424
1823	22:03:40	25.307	75.419	3.9	65.424
1824	22:03:50	25.307	75.419	3.9	65.424
1825	22:04:00	25.307	75.419	3.9	65.424
1826	22:04:10	25.307	75.419	3.9	65.424
1827	22:04:20	25.307	75.419	3.9	65.424
1828	22:04:30	25.307	75.419	3.9	65.424
1829	22:04:40	25.307	75.419	3.9	65.424
1830	22:04:50	25.307	75.389	11.8	65.424
1831	22:05:00	25.307	75.389	11.8	65.424
1832	22:05:10	25.307	75.389	3.9	65.424
1833	22:05:20	25.307	75.389	3.9	65.424
1834	22:05:30	25.307	75.36	3.9	65.424
1835	22:05:40	25.307	75.389	3.9	65.375
1836	22:05:50	25.307	75.389	11.8	65.424
1837	22:06:00	25.307	75.36	11.8	65.375
1838	22:06:10	25.307	75.389	11.8	65.375
1839	22:06:20	25.307	75.36	3.9	65.424
1840	22:06:30	25.307	75.36	3.9	65.424
1841	22:06:40	25.307	75.36	3.9	65.375
1842	22:06:50	25.307	75.36	3.9	65.424
1843	22:07:00	25.307	75.36	3.9	65.424
1844	22:07:10	25.307	75.36	3.9	65.375
1845	22:07:20	25.307	75.36	3.9	65.424
1846	22:07:30	25.307	75.36	11.8	65.424
1847	22:07:40	25.307	75.36	3.9	65.424
1848	22:07:50	25.307	75.331	3.9	65.424
1849	22:08:00	25.307	75.331	3.9	65.424
1850	22:08:10	25.307	75.36	3.9	65.424
1851	22:08:20	25.307	75.331	3.9	65.424
1852	22:08:30	25.307	75.331	3.9	65.424
1853	22:08:40	25.307	75.331	11.8	65.424
1854	22:08:50	25.307	75.331	3.9	65.424
1855	22:09:00	25.331	75.336	3.9	65.424
1856	22:09:10	25.307	75.331	3.9	65.424
1857	22:09:20	25.307	75.331	3.9	65.375
1858	22:09:30	25.307	75.302	3.9	65.424
1859	22:09:40	25.307	75.302	11.8	65.424
1860	22:09:50	25.331	75.306	11.8	65.424
1861	22:10:00	25.307	75.302	3.9	65.424
1862	22:10:10	25.331	75.306	3.9	65.424
1863	22:10:20	25.331	75.306	3.9	65.424
1864	22:10:30	25.307	75.302	11.8	65.424
1865	22:10:40	25.331	75.277	3.9	65.424
1866	22:10:50	25.331	75.306	3.9	65.424
1867	22:11:00	25.331	75.277	3.9	65.424
1868	22:11:10	25.331	75.277	3.9	65.424
1869	22:11:20	25.331	75.277	3.9	65.424
1870	22:11:30	25.307	75.272	3.9	65.424
1871	22:11:40	25.331	75.277	3.9	65.424
1872	22:11:50	25.331	75.277	3.9	65.424
1873	22:12:00	25.331	75.248	3.9	65.424
1874	22:12:10	25.331	75.248	3.9	65.375
1875	22:12:20	25.331	75.248	3.9	65.424
1876	22:12:30	25.331	75.248	3.9	65.424
1877	22:12:40	25.331	75.248	3.9	65.375
1878	22:12:50	25.331	75.248	3.9	65.424
1879	22:13:00	25.331	75.248	3.9	65.424
1880	22:13:10	25.331	75.248	3.9	65.424
1881	22:13:20	25.331	75.248	3.9	65.424
1882	22:13:30	25.331	75.248	3.9	65.424
1883	22:13:40	25.331	75.219	3.9	65.424
1884	22:13:50	25.331	75.219	3.9	65.424
1885	22:14:00	25.331	75.219	3.9	65.424
1886	22:14:10	25.331	75.219	3.9	65.424
1887	22:14:20	25.307	75.214	3.9	65.424
1888	22:14:30	25.331	75.219	3.9	65.424
1889	22:14:40	25.331	75.189	3.9	65.424
1890	22:14:50	25.331	75.219	3.9	65.424
1891	22:15:00	25.331	75.189	3.9	65.424
1892	22:15:10	25.331	75.219	11.8	65.424
1893	22:15:20	25.331	75.189	3.9	65.424
1894	22:15:30	25.331	75.219	11.8	65.424
1895	22:15:40	25.331	75.189	3.9	65.424
1896	22:15:50	25.331	75.189	3.9	65.424
1897	22:16:00	25.331	75.189	3.9	65.424
1898	22:16:10	25.331	75.189	11.8	65.424
1899	22:16:20	25.331	75.189	3.9	65.424
1900	22:16:30	25.331	75.189	11.8	65.424
1901	22:16:40	25.331	75.189	3.9	65.424
1902	22:16:50	25.331	75.189	11.8	65.424
1903	22:17:00	25.331	75.16	3.9	65.424
1904	22:17:10	25.331	75.16	3.9	65.424
1905	22:17:20	25.331	75.16	3.9	65.424
1906	22:17:30	25.331	75.16	3.9	65.424
1907	22:17:40	25.331	75.189	3.9	65.424
1908	22:17:50	25.331	75.16	3.9	65.424
1909	22:18:00	25.331	75.16	3.9	65.424
1910	22:18:10	25.331	75.16	3.9	65.424
1911	22:18:20	25.331	75.16	3.9	65.424
1912	22:18:30	25.331	75.131	3.9	65.424
1913	22:18:40	25.331	75.16	3.9	65.424
1914	22:18:50	25.331	75.16	11.8	65.424
1915	22:19:00	25.331	75.131	3.9	65.424
1916	22:19:10	25.331	75.16	3.9	65.424
1917	22:19:20	25.331	75.131	3.9	65.424
1918	22:19:30	25.331	75.131	3.9	65.424
1919	22:19:40	25.331	75.131	3.9	65.424
1920	22:19:50	25.331	75.131	3.9	65.424
1921	22:20:00	25.331	75.131	3.9	65.424
1922	22:20:10	25.331	75.131	11.8	65.424
1923	22:20:20	25.331	75.131	3.9	65.424
1924	22:20:30	25.331	75.102	11.8	65.424
1925	22:20:40	25.331	75.102	3.9	65.424
1926	22:20:50	25.331	75.102	3.9	65.424
1927	22:21:00	25.331	75.102	3.9	65.424
1928	22:21:10	25.331	75.102	3.9	65.424
1929	22:21:20	25.331	75.102	3.9	65.424
1930	22:21:30	25.331	75.102	3.9	65.424
1931	22:21:40	25.331	75.072	3.9	65.424
1932	22:21:50	25.331	75.072	11.8	65.424
1933	22:22:00	25.331	75.102	3.9	65.424
1934	22:22:10	25.331	75.072	3.9	65.424
1935	22:22:20	25.331	75.072	3.9	65.424
1936	22:22:30	25.331	75.072	3.9	65.424
1937	22:22:40	25.331	75.072	3.9	65.424
1938	22:22:50	25.331	75.072	3.9	65.424
1939	22:23:00	25.331	75.072	11.8	65.424
1940	22:23:10	25.331	75.072	3.9	65.424
1941	22:23:20	25.331	75.072	3.9	65.424
1942	22:23:30	25.331	75.072	11.8	65.424
1943	22:23:40	25.331	75.043	3.9	65.424
1944	22:23:50	25.331	75.014	3.9	65.424
1945	22:24:00	25.331	75.043	11.8	65.424
1946	22:24:10	25.331	75.043	11.8	65.424
1947	22:24:20	25.331	75.043	3.9	65.424
1948	22:24:30	25.331	75.043	11.8	65.424
1949	22:24:40	25.331	75.014	3.9	65.424
1950	22:24:50	25.331	75.014	3.9	65.424
1951	22:25:00	25.331	75.014	3.9	65.424
1952	22:25:10	25.331	75.014	3.9	65.424
1953	22:25:20	25.331	75.014	3.9	65.424
1954	22:25:30	25.331	75.014	3.9	65.424
1955	22:25:40	25.331	75.014	11.8	65.424
1956	22:25:50	25.331	75.014	3.9	65.424
1957	22:26:00	25.331	75.014	3.9	65.424
1958	22:26:10	25.331	74.985	3.9	65.424
1959	22:26:20	25.331	75.014	3.9	65.424
1960	22:26:30	25.331	74.985	3.9	65.424
1961	22:26:40	25.331	74.985	3.9	65.424
1962	22:26:50	25.331	74.985	3.9	65.424
1963	22:27:00	25.331	74.985	11.8	65.424
1964	22:27:10	25.331	74.985	3.9	65.424
1965	22:27:20	25.331	74.985	11.8	65.424
1966	22:27:30	25.331	74.985	3.9	65.424
1967	22:27:40	25.331	74.985	11.8	65.424
1968	22:27:50	25.331	74.985	3.9	65.424
1969	22:28:00	25.331	74.955	3.9	65.424
1970	22:28:10	25.331	74.955	3.9	65.424
1971	22:28:20	25.331	74.985	3.9	65.424
1972	22:28:30	25.331	74.955	3.9	65.424
1973	22:28:40	25.331	74.955	3.9	65.424
1974	22:28:50	25.331	74.955	11.8	65.424
1975	22:29:00	25.331	74.955	3.9	65.424
1976	22:29:10	25.331	74.955	3.9	65.424
1977	22:29:20	25.307	74.951	3.9	65.424
1978	22:29:30	25.331	74.955	3.9	65.424
1979	22:29:40	25.331	74.926	3.9	65.424
1980	22:29:50	25.331	74.955	11.8	65.473
1981	22:30:00	25.331	74.955	3.9	65.424
1982	22:30:10	25.331	74.955	3.9	65.424
1983	22:30:20	25.331	74.926	11.8	65.424
1984	22:30:30	25.331	74.926	3.9	65.424
1985	22:30:40	25.331	74.926	3.9	65.424
1986	22:30:50	25.331	74.926	3.9	65.424
1987	22:31:00	25.331	74.926	3.9	65.424
1988	22:31:10	25.331	74.926	3.9	65.424
1989	22:31:20	25.331	74.897	3.9	65.424
1990	22:31:30	25.331	74.926	3.9	65.424
1991	22:31:40	25.331	74.926	11.8	65.424
1992	22:31:50	25.307	74.892	3.9	65.424
1993	22:32:00	25.331	74.926	3.9	65.424
1994	22:32:10	25.331	74.897	3.9	65.424
1995	22:32:20	25.331	74.926	3.9	65.424
1996	22:32:30	25.307	74.892	3.9	65.424
1997	22:32:40	25.331	74.897	3.9	65.424
1998	22:32:50	25.331	74.897	3.9	65.424
1999	22:33:00	25.331	74.897	3.9	65.424
2000	22:33:10	25.307	74.892	11.8	65.424
2001	22:33:20	25.331	74.897	3.9	65.424
2002	22:33:30	25.331	74.897	3.9	65.473
2003	22:33:40	25.307	74.863	3.9	65.424
2004	22:33:50	25.331	74.897	3.9	65.424
2005	22:34:00	25.331	74.897	3.9	65.424
2006	22:34:10	25.307	74.892	3.9	65.424
2007	22:34:20	25.307	74.892	3.9	65.424
2008	22:34:30	25.307	74.863	11.8	65.424
2009	22:34:40	25.331	74.897	3.9	65.424
2010	22:34:50	25.331	74.867	3.9	65.424
2011	22:35:00	25.307	74.863	3.9	65.424
2012	22:35:10	25.307	74.863	3.9	65.424
2013	22:35:20	25.307	74.863	3.9	65.424
2014	22:35:30	25.331	74.867	3.9	65.424
2015	22:35:40	25.331	74.867	3.9	65.424
2016	22:35:50	25.307	74.863	3.9	65.424
2017	22:36:00	25.331	74.867	3.9	65.424
2018	22:36:10	25.331	74.867	11.8	65.424
2019	22:36:20	25.307	74.863	3.9	65.424
2020	22:36:30	25.331	74.867	11.8	65.424
2021	22:36:40	25.331	74.867	3.9	65.424
2022	22:36:50	25.331	74.867	3.9	65.424
2023	22:37:00	25.331	74.867	11.8	65.424
2024	22:37:10	25.331	74.838	3.9	65.424
2025	22:37:20	25.331	74.867	3.9	65.424
2026	22:37:30	25.307	74.863	3.9	65.424
2027	22:37:40	25.331	74.838	11.8	65.424
2028	22:37:50	25.331	74.867	3.9	65.424
2029	22:38:00	25.331	74.867	3.9	65.424
2030	22:38:10	25.331	74.867	3.9	65.424
2031	22:38:20	25.331	74.867	3.9	65.424
2032	22:38:30	25.331	74.867	3.9	65.424
2033	22:38:40	25.331	74.867	3.9	65.424
2034	22:38:50	25.331	74.838	3.9	65.424
2035	22:39:00	25.331	74.867	3.9	65.424
2036	22:39:10	25.331	74.867	3.9	65.424
2037	22:39:20	25.331	74.867	3.9	65.424
2038	22:39:30	25.331	74.867	3.9	65.424
2039	22:39:40	25.331	74.867	3.9	65.424
2040	22:39:50	25.331	74.838	3.9	65.424
2041	22:40:00	25.331	74.838	3.9	65.424
2042	22:40:10	25.331	74.838	11.8	65.424
2043	22:40:20	25.331	74.867	3.9	65.424
2044	22:40:30	25.331	74.838	3.9	65.424
2045	22:40:40	25.331	74.867	3.9	65.424
2046	22:40:50	25.331	74.867	3.9	65.424
2047	22:41:00	25.331	74.867	3.9	65.424
2048	22:41:10	25.331	74.838	3.9	65.424
2049	22:41:20	25.331	74.838	3.9	65.424
2050	22:41:30	25.331	74.838	3.9	65.424
2051	22:41:40	25.331	74.838	3.9	65.424
2052	22:41:50	25.331	74.838	3.9	65.424
2053	22:42:00	25.331	74.838	3.9	65.424
2054	22:42:10	25.331	74.867	3.9	65.424
2055	22:42:20	25.331	74.838	3.9	65.424
2056	22:42:30	25.331	74.838	3.9	65.424
2057	22:42:40	25.331	74.867	3.9	65.424
2058	22:42:50	25.331	74.838	3.9	65.424
2059	22:43:00	25.331	74.838	3.9	65.424
2060	22:43:10	25.331	74.838	3.9	65.424
2061	22:43:20	25.331	74.838	3.9	65.424
2062	22:43:30	25.331	74.838	3.9	65.424
2063	22:43:40	25.331	74.867	3.9	65.424
2064	22:43:50	25.331	74.838	3.9	65.424
2065	22:44:00	25.331	74.838	3.9	65.424
2066	22:44:10	25.331	74.838	3.9	65.424
2067	22:44:20	25.331	74.838	3.9	65.424
2068	22:44:30	25.331	74.838	3.9	65.424
2069	22:44:40	25.331	74.838	3.9	65.424
2070	22:44:50	25.331	74.838	11.8	65.424
2071	22:45:00	25.331	74.838	3.9	65.424
2072	22:45:10	25.331	74.838	3.9	65.424
2073	22:45:20	25.331	74.838	3.9	65.424
2074	22:45:30	25.331	74.838	3.9	65.424
2075	22:45:40	25.331	74.809	11.8	65.424
2076	22:45:50	25.331	74.809	3.9	65.424
2077	22:46:00	25.331	74.809	3.9	65.424
2078	22:46:10	25.331	74.809	3.9	65.424
2079	22:46:20	25.331	74.809	3.9	65.424
2080	22:46:30	25.331	74.809	3.9	65.473
2081	22:46:40	25.331	74.809	3.9	65.424
2082	22:46:50	25.331	74.78	3.9	65.424
2083	22:47:00	25.331	74.809	3.9	65.424
2084	22:47:10	25.331	74.809	3.9	65.424
2085	22:47:20	25.331	74.78	11.8	65.424
2086	22:47:30	25.331	74.78	11.8	65.424
2087	22:47:40	25.331	74.78	11.8	65.424
2088	22:47:50	25.331	74.78	3.9	65.424
2089	22:48:00	25.331	74.78	3.9	65.424
2090	22:48:10	25.331	74.78	3.9	65.424
2091	22:48:20	25.331	74.78	3.9	65.424
2092	22:48:30	25.331	74.75	3.9	65.424
2093	22:48:40	25.331	74.78	3.9	65.424
2094	22:48:50	25.331	74.75	3.9	65.424
2095	22:49:00	25.331	74.75	11.8	65.424
2096	22:49:10	25.331	74.75	3.9	65.424
2097	22:49:20	25.331	74.721	3.9	65.424
2098	22:49:30	25.331	74.75	3.9	65.473
2099	22:49:40	25.355	74.726	3.9	65.424
2100	22:49:50	25.331	74.75	3.9	65.473
2101	22:50:00	25.355	74.726	11.8	65.424
2102	22:50:10	25.331	74.75	3.9	65.424
2103	22:50:20	25.331	74.721	3.9	65.473
2104	22:50:30	25.331	74.721	3.9	65.473
2105	22:50:40	25.331	74.721	3.9	65.473
2106	22:50:50	25.331	74.721	11.8	65.424
2107	22:51:00	25.331	74.721	3.9	65.424
2108	22:51:10	25.331	74.721	3.9	65.424
2109	22:51:20	25.331	74.721	11.8	65.424
2110	22:51:30	25.331	74.721	3.9	65.424
2111	22:51:40	25.331	74.721	3.9	65.424
2112	22:51:50	25.331	74.721	3.9	65.424
2113	22:52:00	25.331	74.721	3.9	65.424
2114	22:52:10	25.331	74.721	3.9	65.424
2115	22:52:20	25.331	74.721	11.8	65.424
2116	22:52:30	25.331	74.721	3.9	65.424
2117	22:52:40	25.331	74.721	11.8	65.424
2118	22:52:50	25.331	74.721	11.8	65.424
2119	22:53:00	25.331	74.721	3.9	65.424
2120	22:53:10	25.331	74.721	3.9	65.473
2121	22:53:20	25.355	74.696	3.9	65.473
2122	22:53:30	25.331	74.692	3.9	65.473
2123	22:53:40	25.331	74.721	3.9	65.473
2124	22:53:50	25.331	74.692	3.9	65.424
2125	22:54:00	25.331	74.692	3.9	65.424
2126	22:54:10	25.331	74.721	3.9	65.473
2127	22:54:20	25.331	74.692	3.9	65.424
2128	22:54:30	25.331	74.692	3.9	65.424
2129	22:54:40	25.355	74.696	3.9	65.424
2130	22:54:50	25.331	74.692	3.9	65.424
2131	22:55:00	25.355	74.696	3.9	65.424
2132	22:55:10	25.355	74.696	3.9	65.473
2133	22:55:20	25.331	74.662	3.9	65.473
2134	22:55:30	25.331	74.662	3.9	65.424
2135	22:55:40	25.331	74.662	11.8	65.424
2136	22:55:50	25.331	74.662	3.9	65.424
2137	22:56:00	25.331	74.662	3.9	65.424
2138	22:56:10	25.355	74.667	3.9	65.473
2139	22:56:20	25.331	74.662	3.9	65.473
2140	22:56:30	25.331	74.662	3.9	65.473
2141	22:56:40	25.331	74.662	3.9	65.473
2142	22:56:50	25.331	74.662	3.9	65.473
2143	22:57:00	25.331	74.662	3.9	65.473
2144	22:57:10	25.331	74.662	11.8	65.473
2145	22:57:20	25.331	74.662	3.9	65.473
2146	22:57:30	25.331	74.662	3.9	65.473
2147	22:57:40	25.355	74.638	3.9	65.424
2148	22:57:50	25.331	74.662	3.9	65.424
2149	22:58:00	25.331	74.633	3.9	65.424
2150	22:58:10	25.331	74.633	3.9	65.424
2151	22:58:20	25.331	74.633	11.8	65.424
2152	22:58:30	25.355	74.638	3.9	65.424
2153	22:58:40	25.331	74.633	3.9	65.424
2154	22:58:50	25.331	74.633	3.9	65.424
2155	22:59:00	25.331	74.633	3.9	65.424
2156	22:59:10	25.331	74.633	3.9	65.424
2157	22:59:20	25.331	74.633	3.9	65.424
2158	22:59:30	25.331	74.604	3.9	65.473
2159	22:59:40	25.331	74.604	3.9	65.473
2160	22:59:50	25.355	74.638	3.9	65.473
2161	23:00:00	25.331	74.604	3.9	65.424
2162	23:00:10	25.355	74.608	3.9	65.473
2163	23:00:20	25.331	74.633	3.9	65.424
2164	23:00:30	25.331	74.604	3.9	65.473
2165	23:00:40	25.331	74.633	3.9	65.473
2166	23:00:50	25.331	74.604	3.9	65.473
2167	23:01:00	25.331	74.604	3.9	65.473
2168	23:01:10	25.331	74.604	3.9	65.473
2169	23:01:20	25.355	74.608	3.9	65.473
2170	23:01:30	25.331	74.604	3.9	65.473
2171	23:01:40	25.331	74.604	3.9	65.473
2172	23:01:50	25.331	74.604	3.9	65.473
2173	23:02:00	25.355	74.579	3.9	65.473
2174	23:02:10	25.331	74.574	3.9	65.473
2175	23:02:20	25.331	74.574	3.9	65.473
2176	23:02:30	25.331	74.604	3.9	65.473
2177	23:02:40	25.331	74.604	3.9	65.473
2178	23:02:50	25.331	74.574	3.9	65.473
2179	23:03:00	25.331	74.545	3.9	65.424
2180	23:03:10	25.331	74.574	3.9	65.424
2181	23:03:20	25.331	74.574	3.9	65.424
2182	23:03:30	25.331	74.574	3.9	65.473
2183	23:03:40	25.331	74.574	11.8	65.473
2184	23:03:50	25.331	74.545	3.9	65.473
2185	23:04:00	25.331	74.545	3.9	65.473
2186	23:04:10	25.331	74.545	3.9	65.473
2187	23:04:20	25.331	74.545	11.8	65.473
2188	23:04:30	25.331	74.545	3.9	65.473
2189	23:04:40	25.331	74.545	3.9	65.473
2190	23:04:50	25.331	74.545	11.8	65.424
2191	23:05:00	25.331	74.545	11.8	65.473
2192	23:05:10	25.331	74.545	3.9	65.473
2193	23:05:20	25.331	74.545	3.9	65.473
2194	23:05:30	25.331	74.545	3.9	65.424
2195	23:05:40	25.331	74.545	3.9	65.473
2196	23:05:50	25.331	74.516	11.8	65.473
2197	23:06:00	25.331	74.545	3.9	65.473
2198	23:06:10	25.331	74.545	3.9	65.473
2199	23:06:20	25.331	74.545	3.9	65.473
2200	23:06:30	25.331	74.516	3.9	65.473
2201	23:06:40	25.331	74.516	3.9	65.473
2202	23:06:50	25.331	74.545	3.9	65.473
2203	23:07:00	25.331	74.545	3.9	65.473
2204	23:07:10	25.331	74.516	3.9	65.473
2205	23:07:20	25.331	74.545	3.9	65.473
2206	23:07:30	25.331	74.516	3.9	65.473
2207	23:07:40	25.331	74.545	3.9	65.473
2208	23:07:50	25.331	74.516	3.9	65.473
2209	23:08:00	25.331	74.516	3.9	65.473
2210	23:08:10	25.331	74.545	3.9	65.473
2211	23:08:20	25.331	74.516	3.9	65.473
2212	23:08:30	25.331	74.516	11.8	65.473
2213	23:08:40	25.331	74.545	3.9	65.473
2214	23:08:50	25.331	74.516	3.9	65.473
2215	23:09:00	25.331	74.516	3.9	65.473
2216	23:09:10	25.331	74.516	3.9	65.473
2217	23:09:20	25.331	74.516	3.9	65.473
2218	23:09:30	25.331	74.516	11.8	65.473
2219	23:09:40	25.331	74.516	3.9	65.473
2220	23:09:50	25.331	74.516	3.9	65.473
2221	23:10:00	25.331	74.516	11.8	65.473
2222	23:10:10	25.331	74.516	3.9	65.473
2223	23:10:20	25.331	74.516	3.9	65.473
2224	23:10:30	25.331	74.516	3.9	65.473
2225	23:10:40	25.331	74.516	3.9	65.473
2226	23:10:50	25.331	74.516	3.9	65.473
2227	23:11:00	25.331	74.516	3.9	65.473
2228	23:11:10	25.331	74.516	3.9	65.473
2229	23:11:20	25.331	74.516	3.9	65.473
2230	23:11:30	25.331	74.516	3.9	65.473
2231	23:11:40	25.331	74.516	3.9	65.473
2232	23:11:50	25.331	74.516	11.8	65.473
2233	23:12:00	25.331	74.486	3.9	65.473
2234	23:12:10	25.331	74.486	3.9	65.473
2235	23:12:20	25.331	74.516	3.9	65.473
2236	23:12:30	25.331	74.486	3.9	65.473
2237	23:12:40	25.331	74.516	3.9	65.473
2238	23:12:50	25.331	74.516	3.9	65.473
2239	23:13:00	25.331	74.486	3.9	65.473
2240	23:13:10	25.331	74.486	3.9	65.473
2241	23:13:20	25.331	74.486	3.9	65.473
2242	23:13:30	25.331	74.486	3.9	65.473
2243	23:13:40	25.331	74.486	3.9	65.473
2244	23:13:50	25.331	74.486	3.9	65.473
2245	23:14:00	25.331	74.486	3.9	65.424
2246	23:14:10	25.331	74.486	3.9	65.473
2247	23:14:20	25.331	74.486	3.9	65.473
2248	23:14:30	25.331	74.486	3.9	65.473
2249	23:14:40	25.331	74.486	3.9	65.473
2250	23:14:50	25.331	74.486	3.9	65.473
2251	23:15:00	25.331	74.486	3.9	65.473
2252	23:15:10	25.331	74.486	3.9	65.473
2253	23:15:20	25.331	74.486	3.9	65.473
2254	23:15:30	25.331	74.486	3.9	65.473
2255	23:15:40	25.331	74.486	3.9	65.473
2256	23:15:50	25.331	74.486	3.9	65.473
2257	23:16:00	25.331	74.486	11.8	65.473
2258	23:16:10	25.331	74.486	3.9	65.473
2259	23:16:20	25.331	74.486	11.8	65.473
2260	23:16:30	25.331	74.486	3.9	65.473
2261	23:16:40	25.331	74.486	11.8	65.473
2262	23:16:50	25.331	74.457	3.9	65.473
2263	23:17:00	25.331	74.486	3.9	65.473
2264	23:17:10	25.331	74.457	3.9	65.473
2265	23:17:20	25.331	74.486	3.9	65.473
2266	23:17:30	25.331	74.486	3.9	65.473
2267	23:17:40	25.331	74.486	3.9	65.473
2268	23:17:50	25.331	74.486	11.8	65.473
2269	23:18:00	25.331	74.486	3.9	65.473
2270	23:18:10	25.331	74.486	3.9	65.473
2271	23:18:20	25.331	74.457	3.9	65.473
2272	23:18:30	25.331	74.457	3.9	65.473
2273	23:18:40	25.331	74.457	3.9	65.473
2274	23:18:50	25.331	74.486	3.9	65.473
2275	23:19:00	25.331	74.457	3.9	65.473
2276	23:19:10	25.331	74.457	3.9	65.473
2277	23:19:20	25.331	74.457	3.9	65.473
2278	23:19:30	25.331	74.428	3.9	65.473
2279	23:19:40	25.331	74.457	3.9	65.473
2280	23:19:50	25.331	74.428	3.9	65.473
2281	23:20:00	25.331	74.457	3.9	65.473
2282	23:20:10	25.331	74.428	3.9	65.473
2283	23:20:20	25.331	74.457	3.9	65.473
2284	23:20:30	25.331	74.428	3.9	65.473
2285	23:20:40	25.331	74.428	3.9	65.473
2286	23:20:50	25.331	74.428	3.9	65.473
2287	23:21:00	25.331	74.428	3.9	65.473
2288	23:21:10	25.331	74.428	3.9	65.473
2289	23:21:20	25.331	74.428	3.9	65.473
2290	23:21:30	25.331	74.428	3.9	65.473
2291	23:21:40	25.331	74.428	3.9	65.473
2292	23:21:50	25.331	74.428	3.9	65.473
2293	23:22:00	25.331	74.428	3.9	65.473
2294	23:22:10	25.331	74.428	3.9	65.473
2295	23:22:20	25.331	74.428	3.9	65.473
2296	23:22:30	25.331	74.428	3.9	65.473
2297	23:22:40	25.331	74.398	11.8	65.473
2298	23:22:50	25.331	74.428	3.9	65.473
2299	23:23:00	25.331	74.398	11.8	65.473
2300	23:23:10	25.331	74.398	3.9	65.473
2301	23:23:20	25.331	74.398	3.9	65.473
2302	23:23:30	25.331	74.398	3.9	65.473
2303	23:23:40	25.331	74.398	3.9	65.473
2304	23:23:50	25.331	74.398	3.9	65.473
2305	23:24:00	25.331	74.398	3.9	65.473
2306	23:24:10	25.331	74.398	3.9	65.473
2307	23:24:20	25.331	74.398	3.9	65.473
2308	23:24:30	25.331	74.398	3.9	65.473
2309	23:24:40	25.331	74.398	3.9	65.473
2310	23:24:50	25.331	74.369	3.9	65.473
2311	23:25:00	25.331	74.369	3.9	65.473
2312	23:25:10	25.331	74.369	11.8	65.473
2313	23:25:20	25.331	74.398	3.9	65.473
2314	23:25:30	25.331	74.369	3.9	65.473
2315	23:25:40	25.331	74.369	11.8	65.473
2316	23:25:50	25.331	74.369	3.9	65.473
2317	23:26:00	25.331	74.369	3.9	65.473
2318	23:26:10	25.331	74.369	3.9	65.473
2319	23:26:20	25.331	74.369	3.9	65.473
2320	23:26:30	25.331	74.369	11.8	65.473
2321	23:26:40	25.331	74.369	3.9	65.473
2322	23:26:50	25.331	74.369	3.9	65.473
2323	23:27:00	25.331	74.369	3.9	65.473
2324	23:27:10	25.331	74.369	3.9	65.473
2325	23:27:20	25.331	74.369	3.9	65.473
2326	23:27:30	25.331	74.369	3.9	65.473
2327	23:27:40	25.331	74.369	3.9	65.473
2328	23:27:50	25.331	74.369	3.9	65.473
2329	23:28:00	25.331	74.369	11.8	65.473
2330	23:28:10	25.331	74.369	3.9	65.473
2331	23:28:20	25.331	74.369	3.9	65.473
2332	23:28:30	25.331	74.369	3.9	65.473
2333	23:28:40	25.331	74.369	3.9	65.473
2334	23:28:50	25.331	74.369	3.9	65.473
2335	23:29:00	25.331	74.34	11.8	65.473
2336	23:29:10	25.331	74.369	3.9	65.473
2337	23:29:20	25.331	74.34	3.9	65.473
2338	23:29:30	25.331	74.369	3.9	65.473
2339	23:29:40	25.331	74.369	3.9	65.473
2340	23:29:50	25.331	74.369	3.9	65.473
2341	23:30:00	25.331	74.369	3.9	65.473
2342	23:30:10	25.331	74.369	3.9	65.473
2343	23:30:20	25.331	74.369	3.9	65.473
2344	23:30:30	25.331	74.369	3.9	65.473
2345	23:30:40	25.331	74.369	3.9	65.473
2346	23:30:50	25.331	74.34	3.9	65.473
2347	23:31:00	25.331	74.34	3.9	65.473
2348	23:31:10	25.331	74.369	3.9	65.473
2349	23:31:20	25.331	74.369	3.9	65.473
2350	23:31:30	25.331	74.369	3.9	65.473
2351	23:31:40	25.331	74.369	11.8	65.473
2352	23:31:50	25.331	74.369	3.9	65.473
2353	23:32:00	25.331	74.369	3.9	65.473
2354	23:32:10	25.331	74.369	3.9	65.473
2355	23:32:20	25.331	74.369	3.9	65.473
2356	23:32:30	25.331	74.369	3.9	65.473
2357	23:32:40	25.331	74.369	11.8	65.473
2358	23:32:50	25.331	74.369	3.9	65.473
2359	23:33:00	25.331	74.369	3.9	65.473
2360	23:33:10	25.331	74.369	3.9	65.473
2361	23:33:20	25.331	74.369	3.9	65.473
2362	23:33:30	25.331	74.369	3.9	65.473
2363	23:33:40	25.331	74.369	3.9	65.473
2364	23:33:50	25.331	74.369	3.9	65.473
2365	23:34:00	25.331	74.369	3.9	65.473
2366	23:34:10	25.331	74.369	3.9	65.473
2367	23:34:20	25.331	74.369	3.9	65.473
2368	23:34:30	25.331	74.369	3.9	65.473
2369	23:34:40	25.331	74.369	3.9	65.473
2370	23:34:50	25.331	74.369	11.8	65.473
2371	23:35:00	25.331	74.369	3.9	65.473
2372	23:35:10	25.331	74.369	3.9	65.473
2373	23:35:20	25.331	74.369	3.9	65.473
2374	23:35:30	25.331	74.369	11.8	65.473
2375	23:35:40	25.331	74.369	3.9	65.473
2376	23:35:50	25.331	74.369	3.9	65.473
2377	23:36:00	25.331	74.34	3.9	65.473
2378	23:36:10	25.331	74.369	11.8	65.473
2379	23:36:20	25.331	74.369	3.9	65.473
2380	23:36:30	25.331	74.369	11.8	65.473
2381	23:36:40	25.331	74.369	11.8	65.473
2382	23:36:50	25.331	74.369	3.9	65.473
2383	23:37:00	25.331	74.369	3.9	65.473
2384	23:37:10	25.331	74.369	3.9	65.473
2385	23:37:20	25.331	74.369	3.9	65.473
2386	23:37:30	25.331	74.369	3.9	65.473
2387	23:37:40	25.331	74.369	3.9	65.473
2388	23:37:50	25.331	74.34	3.9	65.473
2389	23:38:00	25.331	74.369	3.9	65.473
2390	23:38:10	25.331	74.34	3.9	65.473
[truncated: 503 more rows]

## Sheet: 20170501_NangGung
Plot Title: 20034486_20170501_NangGang
#	Date Time, GMT+08:00	Temp, °C (LGR S/N: 20034486, SEN S/N: 20034486)	RH, % (LGR S/N: 20034486, SEN S/N: 20034486)	Intensity, Lux (LGR S/N: 20034486, SEN S/N: 20034486)	Temp, °C (LGR S/N: 20034486, SEN S/N: 20034486)	Host Connected (LGR S/N: 20034486)	Stopped (LGR S/N: 20034486)	End Of File (LGR S/N: 20034486)
316	18:22:30	23.785	78.989	106.4	69.902		time	Temp-av	temp-std	RH-av	Rh-std	Intensity, Lux-av	Int-std		interval
317	18:22:40	23.785	78.616	106.4	69.792		before	23.2111	0.36145	81.7914	1.83243	68.0578	21.0258	2017-05-01	18:22-18:30
318	18:22:50	23.785	78.53	106.4	69.682
319	18:23:00	23.761	78.697	98.5	69.572
320	18:23:10	23.737	79.094	98.5	69.517
321	18:23:20	23.689	79.341	98.5	69.463
322	18:23:30	23.665	79.422	98.5	69.463
323	18:23:40	23.641	79.76	90.7	69.408
324	18:23:50	23.617	79.784	90.7	69.354
325	18:24:00	23.569	79.774	90.7	69.299
326	18:24:10	23.545	79.854	82.8	69.245
327	18:24:20	23.521	80.192	82.8	69.191
328	18:24:30	23.497	80.557	82.8	69.137
329	18:24:40	23.448	80.689	82.8	69.082
330	18:24:50	23.424	80.656	74.9	68.975
331	18:25:00	23.4	80.906	74.9	68.921
332	18:25:10	23.376	80.873	74.9	68.867
333	18:25:20	23.328	81.487	74.9	68.76
334	18:25:30	23.304	81.709	74.9	68.706
335	18:25:40	23.28	81.817	67	68.706
336	18:25:50	23.256	81.896	67	68.706
337	18:26:00	23.232	81.835	67	68.706
338	18:26:10	23.184	81.966	67	68.706
339	18:26:20	23.16	81.932	67	68.706
340	18:26:30	23.136	82.21	67	68.706
341	18:26:40	23.112	82.43	59.1	68.706
342	18:26:50	23.088	82.566	59.1	68.706
343	18:27:00	23.064	82.758	59.1	68.706
344	18:27:10	23.04	82.978	59.1	68.706
345	18:27:20	23.016	83.142	51.2	68.706
346	18:27:30	22.968	83.075	51.2	68.706
347	18:27:40	22.968	83.019	51.2	68.706
348	18:27:50	22.92	83.177	51.2	68.706
349	18:28:00	22.92	83.486	51.2	68.706
350	18:28:10	22.872	83.616	51.2	68.706
351	18:28:20	22.848	83.61	51.2	68.706
352	18:28:30	22.824	83.521	43.4	68.706
353	18:28:40	22.8	83.487	43.4	68.706
354	18:28:50	22.776	83.538	43.4	68.706
355	18:29:00	22.753	83.757	43.4	68.706
356	18:29:10	22.729	84.06	43.4	68.706
357	18:29:20	22.705	84.195	43.4	68.706
358	18:29:30	22.681	84.329	43.4	68.706
359	18:29:40	22.657	84.575	35.5	68.706
360	18:29:50	22.633	84.71	35.5	68.706
361	18:30:00	22.609	84.788	35.5	68.706		time	Temp-av	temp-std	RH-av	Rh-std	Intensity, Lux-av	Int-std		interval
362	18:30:10	22.585	84.922	35.5	68.706		flash	21.2385	0.45389	91.9587	2.41084	7.63415	6.9097	2017-05-01	18:30-19:30
363	18:30:20	22.561	84.972	35.5	68.706
364	18:30:30	22.537	84.995	35.5	68.706
365	18:30:40	22.513	84.989	35.5	68.706
366	18:30:50	22.489	85.318	35.5	68.706
367	18:31:00	22.489	85.346	35.5	68.706
368	18:31:10	22.465	85.535	35.5	68.706
369	18:31:20	22.441	85.641	35.5	68.706
370	18:31:30	22.417	85.747	27.6	68.706
371	18:31:40	22.393	85.741	27.6	68.706
372	18:31:50	22.369	85.819	27.6	68.706
373	18:32:00	22.369	86.041	27.6	68.706
374	18:32:10	22.345	86.229	27.6	68.706
375	18:32:20	22.321	86.362	27.6	68.706
376	18:32:30	22.298	86.246	27.6	68.706
377	18:32:40	22.298	86.274	27.6	68.706
378	18:32:50	22.274	86.434	19.7	68.706
379	18:33:00	22.25	86.65	19.7	68.706
380	18:33:10	22.25	86.705	19.7	68.706
381	18:33:20	22.226	86.755	19.7	68.706
382	18:33:30	22.202	86.694	19.7	68.76
383	18:33:40	22.202	86.943	19.7	68.706
384	18:33:50	22.178	86.882	19.7	68.706
385	18:34:00	22.154	87.318	19.7	68.706
386	18:34:10	22.154	88.144	19.7	68.76
387	18:34:20	22.13	88.358	19.7	68.813
388	18:34:30	22.13	88.11	19.7	68.867
389	18:34:40	22.106	87.995	19.7	68.921
390	18:34:50	22.082	87.824	19.7	69.028
391	18:35:00	22.058	87.599	19.7	69.137
392	18:35:10	22.034	87.923	11.8	69.191
393	18:35:20	22.011	87.945	19.7	69.299
394	18:35:30	22.011	87.945	11.8	69.408
395	18:35:40	21.987	88.049	19.7	69.517
396	18:35:50	21.963	88.016	11.8	69.627
397	18:36:00	21.963	88.181	11.8	69.627
398	18:36:10	21.939	88.257	11.8	69.682
399	18:36:20	21.915	88.17	11.8	69.737
400	18:36:30	21.915	88.115	11.8	69.792
401	18:36:40	21.891	88.274	11.8	69.847
402	18:36:50	21.867	88.378	11.8	69.957
403	18:37:00	21.867	88.487	11.8	70.012
404	18:37:10	21.843	88.646	11.8	70.123
405	18:37:20	21.843	88.755	11.8	70.235
406	18:37:30	21.819	88.886	11.8	70.346
407	18:37:40	21.819	88.996	11.8	70.458
408	18:37:50	21.795	89.045	11.8	70.514
409	18:38:00	21.795	89.099	11.8	70.458
410	18:38:10	21.772	89.176	11.8	70.514
411	18:38:20	21.772	89.23	11.8	70.458
412	18:38:30	21.772	89.176	11.8	70.514
413	18:38:40	21.748	89.143	11.8	70.514
414	18:38:50	21.748	89.225	11.8	70.514
415	18:39:00	21.724	89.273	11.8	70.514
416	18:39:10	21.724	89.301	11.8	70.514
417	18:39:20	21.724	89.328	11.8	70.514
418	18:39:30	21.7	89.24	11.8	70.514
419	18:39:40	21.7	89.268	11.8	70.514
420	18:39:50	21.676	89.371	11.8	70.514
421	18:40:00	21.676	89.398	11.8	70.514
422	18:40:10	21.652	89.365	11.8	70.57
423	18:40:20	21.652	89.393	11.8	70.57
424	18:40:30	21.628	89.523	3.9	70.57
425	18:40:40	21.628	89.578	11.8	70.57
426	18:40:50	21.604	89.735	3.9	70.626
427	18:41:00	21.604	89.79	11.8	70.683
428	18:41:10	21.604	89.708	3.9	70.739
429	18:41:20	21.581	89.73	11.8	70.796
430	18:41:30	21.581	89.866	3.9	70.852
431	18:41:40	21.581	89.947	11.8	70.909
432	18:41:50	21.557	89.941	3.9	71.022
433	18:42:00	21.557	89.969	3.9	71.136
434	18:42:10	21.557	90.105	11.8	71.251
435	18:42:20	21.557	90.24	11.8	71.308
436	18:42:30	21.533	90.262	3.9	71.423
437	18:42:40	21.533	90.316	3.9	71.48
438	18:42:50	21.533	90.316	3.9	71.48
439	18:43:00	21.533	90.37	3.9	71.538
440	18:43:10	21.509	90.392	3.9	71.595
441	18:43:20	21.509	90.419	3.9	71.711
442	18:43:30	21.509	90.419	11.8	71.769
443	18:43:40	21.509	90.527	11.8	71.944
444	18:43:50	21.509	90.527	3.9	72.002
445	18:44:00	21.485	90.522	11.8	72.177
446	18:44:10	21.485	90.413	11.8	72.295
447	18:44:20	21.485	90.467	3.9	72.354
448	18:44:30	21.485	90.576	3.9	72.413
449	18:44:40	21.485	90.603	3.9	72.413
450	18:44:50	21.461	90.651	3.9	72.472
451	18:45:00	21.461	90.624	3.9	72.531
452	18:45:10	21.461	90.678	3.9	72.531
453	18:45:20	21.461	90.841	3.9	72.649
454	18:45:30	21.437	90.97	11.8	72.709
455	18:45:40	21.437	90.97	11.8	72.768
456	18:45:50	21.437	90.97	3.9	72.888
457	18:46:00	21.437	90.997	3.9	72.947
458	18:46:10	21.413	90.883	11.8	73.127
459	18:46:20	21.413	90.938	3.9	73.248
460	18:46:30	21.413	91.046	3.9	73.308
461	18:46:40	21.413	90.992	11.8	73.429
462	18:46:50	21.39	91.04	11.8	73.429
463	18:47:00	21.39	91.067	11.8	73.551
464	18:47:10	21.39	91.148	3.9	73.612
465	18:47:20	21.39	91.067	3.9	73.673
466	18:47:30	21.39	91.256	11.8	73.795
467	18:47:40	21.39	91.094	3.9	73.856
468	18:47:50	21.366	91.061	3.9	73.979
469	18:48:00	21.366	91.115	3.9	74.041
470	18:48:10	21.366	91.196	3.9	74.164
471	18:48:20	21.366	91.331	3.9	74.226
472	18:48:30	21.366	91.385	11.8	74.288
473	18:48:40	21.366	91.412	3.9	74.288
474	18:48:50	21.342	91.433	3.9	74.288
475	18:49:00	21.342	91.433	3.9	74.35
476	18:49:10	21.342	91.406	11.8	74.35
477	18:49:20	21.342	91.352	3.9	74.35
478	18:49:30	21.342	91.244	3.9	74.412
479	18:49:40	21.318	91.32	3.9	74.412
480	18:49:50	21.318	91.455	3.9	74.412
481	18:50:00	21.318	91.482	3.9	74.412
482	18:50:10	21.318	91.616	3.9	74.474
483	18:50:20	21.294	91.664	3.9	74.474
484	18:50:30	21.294	91.611	3.9	74.537
485	18:50:40	21.294	91.584	11.8	74.599
486	18:50:50	21.294	91.664	3.9	74.662
487	18:51:00	21.294	91.772	3.9	74.725
488	18:51:10	21.294	91.772	3.9	74.788
489	18:51:20	21.27	91.766	11.8	74.914
490	18:51:30	21.27	91.82	11.8	74.977
491	18:51:40	21.27	91.874	3.9	75.103
492	18:51:50	21.27	91.928	3.9	75.167
493	18:52:00	21.27	91.982	11.8	75.294
494	18:52:10	21.27	91.982	3.9	75.358
495	18:52:20	21.246	92.003	3.9	75.422
496	18:52:30	21.246	92.057	11.8	75.486
497	18:52:40	21.246	92.084	3.9	75.55
498	18:52:50	21.246	91.949	3.9	75.614
499	18:53:00	21.246	91.976	3.9	75.678
500	18:53:10	21.246	91.976	3.9	75.807
501	18:53:20	21.246	92.03	3.9	75.937
502	18:53:30	21.246	92.137	3.9	76.067
503	18:53:40	21.223	92.158	3.9	76.132
504	18:53:50	21.223	92.239	3.9	76.197
505	18:54:00	21.223	92.293	3.9	76.263
506	18:54:10	21.223	92.266	3.9	76.263
507	18:54:20	21.223	92.185	3.9	76.328
508	18:54:30	21.223	92.158	3.9	76.394
509	18:54:40	21.223	92.185	11.8	76.394
510	18:54:50	21.199	92.233	11.8	76.394
511	18:55:00	21.199	92.287	3.9	76.46
512	18:55:10	21.199	92.287	3.9	76.46
513	18:55:20	21.199	92.287	3.9	76.46
514	18:55:30	21.199	92.287	3.9	76.46
515	18:55:40	21.199	92.206	11.8	76.46
516	18:55:50	21.199	92.233	3.9	76.525
517	18:56:00	21.199	92.018	3.9	76.525
518	18:56:10	21.199	92.045	11.8	76.591
519	18:56:20	21.175	92.281	11.8	76.657
520	18:56:30	21.175	92.362	3.9	76.724
521	18:56:40	21.175	92.388	3.9	76.79
522	18:56:50	21.175	92.388	3.9	76.856
523	18:57:00	21.175	92.442	11.8	76.99
524	18:57:10	21.175	92.388	3.9	77.056
525	18:57:20	21.151	92.329	11.8	77.19
526	18:57:30	21.151	92.409	11.8	77.19
527	18:57:40	21.151	92.436	3.9	77.325
528	18:57:50	21.151	92.436	11.8	77.325
529	18:58:00	21.151	92.597	3.9	77.392
530	18:58:10	21.151	92.544	3.9	77.46
531	18:58:20	21.151	92.49	3.9	77.527
532	18:58:30	21.151	92.544	3.9	77.595
533	18:58:40	21.127	92.591	3.9	77.731
534	18:58:50	21.151	92.57	3.9	77.799
535	18:59:00	21.127	92.618	3.9	77.868
536	18:59:10	21.127	92.645	3.9	78.005
537	18:59:20	21.127	92.725	3.9	78.142
538	18:59:30	21.127	92.699	3.9	78.211
539	18:59:40	21.127	92.699	3.9	78.349
540	18:59:50	21.103	92.693	3.9	78.418
541	19:00:00	21.103	92.72	3.9	78.488
542	19:00:10	21.103	92.746	3.9	78.488
543	19:00:20	21.103	92.827	3.9	78.558
544	19:00:30	21.103	92.88	3.9	78.558
545	19:00:40	21.103	92.934	3.9	78.627
546	19:00:50	21.103	92.961	11.8	78.627
547	19:01:00	21.103	92.961	3.9	78.697
548	19:01:10	21.103	92.934	11.8	78.767
549	19:01:20	21.103	92.961	3.9	78.767
550	19:01:30	21.103	92.988	3.9	78.837
551	19:01:40	21.103	92.988	3.9	78.907
552	19:01:50	21.079	92.955	3.9	78.907
553	19:02:00	21.079	92.901	3.9	78.978
554	19:02:10	21.103	92.854	3.9	79.048
555	19:02:20	21.079	92.901	3.9	79.19
556	19:02:30	21.079	92.955	11.8	79.261
557	19:02:40	21.079	92.982	3.9	79.332
558	19:02:50	21.079	93.008	3.9	79.403
559	19:03:00	21.079	93.062	3.9	79.474
560	19:03:10	21.079	93.115	3.9	79.546
561	19:03:20	21.079	93.115	3.9	79.618
562	19:03:30	21.056	93.109	3.9	79.618
563	19:03:40	21.056	93.002	3.9	79.689
564	19:03:50	21.056	92.922	3.9	79.689
565	19:04:00	21.056	92.949	3.9	79.761
566	19:04:10	21.056	93.002	3.9	79.833
567	19:04:20	21.056	93.056	11.8	79.905
568	19:04:30	21.056	93.056	3.9	79.905
569	19:04:40	21.032	93.077	3.9	79.978
570	19:04:50	21.032	93.103	11.8	80.05
571	19:05:00	21.032	93.077	11.8	80.123
572	19:05:10	21.032	93.103	3.9	80.269
573	19:05:20	21.032	93.157	3.9	80.342
574	19:05:30	21.032	93.157	3.9	80.415
575	19:05:40	21.032	93.077	3.9	80.562
576	19:05:50	21.032	92.996	3.9	80.635
577	19:06:00	21.008	93.017	3.9	80.783
578	19:06:10	21.008	92.99	11.8	80.857
579	19:06:20	21.008	93.044	3.9	80.932
580	19:06:30	21.008	93.071	3.9	81.006
581	19:06:40	21.008	93.044	3.9	81.006
582	19:06:50	20.984	93.038	3.9	81.155
583	19:07:00	21.008	93.124	3.9	81.155
584	19:07:10	20.984	93.145	3.9	81.23
585	19:07:20	20.984	93.145	3.9	81.305
586	19:07:30	20.984	93.145	3.9	81.38
587	19:07:40	20.984	93.198	3.9	81.456
588	19:07:50	20.984	93.118	3.9	81.531
589	19:08:00	20.96	93.032	3.9	81.607
590	19:08:10	20.96	93.085	3.9	81.683
591	19:08:20	20.96	93.085	3.9	81.759
592	19:08:30	20.96	93.112	3.9	81.835
593	19:08:40	20.96	93.139	3.9	81.835
594	19:08:50	20.96	93.192	3.9	81.911
595	19:09:00	20.936	93.24	3.9	81.987
596	19:09:10	20.936	93.293	3.9	82.064
597	19:09:20	20.936	93.347	3.9	82.064
598	19:09:30	20.936	93.347	3.9	82.141
599	19:09:40	20.936	93.374	3.9	82.218
600	19:09:50	20.936	93.347	3.9	82.295
601	19:10:00	20.936	93.374	3.9	82.372
602	19:10:10	20.936	93.427	3.9	82.45
603	19:10:20	20.936	93.454	3.9	82.527
604	19:10:30	20.936	93.507	3.9	82.683
605	19:10:40	20.936	93.507	3.9	82.839
606	19:10:50	20.913	93.448	3.9	82.918
607	19:11:00	20.913	93.501	3.9	82.996
608	19:11:10	20.936	93.561	3.9	83.075
609	19:11:20	20.913	93.448	11.8	83.154
610	19:11:30	20.913	93.368	3.9	83.233
611	19:11:40	20.913	93.368	3.9	83.312
612	19:11:50	20.913	93.448	3.9	83.472
613	19:12:00	20.913	93.501	3.9	83.551
614	19:12:10	20.913	93.501	3.9	83.631
615	19:12:20	20.913	93.528	3.9	83.712
616	19:12:30	20.913	93.581	3.9	83.792
617	19:12:40	20.889	93.548	3.9	83.872
618	19:12:50	20.889	93.548	3.9	84.034
619	19:13:00	20.889	93.575	3.9	84.115
620	19:13:10	20.889	93.655	11.8	84.196
621	19:13:20	20.889	93.655	3.9	84.278
622	19:13:30	20.889	93.709	3.9	84.359
623	19:13:40	20.889	93.655	3.9	84.441
624	19:13:50	20.889	93.522	3.9	84.523
625	19:14:00	20.889	93.522	3.9	84.605
626	19:14:10	20.865	93.542	3.9	84.688
627	19:14:20	20.865	93.542	3.9	84.853
628	19:14:30	20.865	93.542	11.8	85.019
629	19:14:40	20.865	93.542	3.9	85.103
630	19:14:50	20.865	93.542	11.8	85.186
631	19:15:00	20.841	93.59	11.8	85.354
632	19:15:10	20.841	93.536	3.9	85.438
633	19:15:20	20.841	93.59	3.9	85.522
634	19:15:30	20.841	93.43	3.9	85.691
635	19:15:40	20.841	93.376	3.9	85.776
636	19:15:50	20.841	93.456	3.9	85.861
637	19:16:00	20.841	93.563	3.9	85.861
638	19:16:10	20.817	93.744	3.9	85.947
639	19:16:20	20.817	93.744	3.9	85.947
640	19:16:30	20.817	93.797	3.9	86.118
641	19:16:40	20.817	93.85	3.9	86.118
642	19:16:50	20.817	93.797	3.9	86.118
643	19:17:00	20.817	93.797	11.8	86.204
644	19:17:10	20.817	93.824	3.9	86.29
645	19:17:20	20.817	93.85	3.9	86.29
646	19:17:30	20.817	93.904	3.9	86.376
647	19:17:40	20.817	93.984	3.9	86.55
648	19:17:50	20.817	94.01	3.9	86.55
649	19:18:00	20.817	94.037	3.9	86.637
650	19:18:10	20.817	94.064	3.9	86.637
651	19:18:20	20.817	94.117	3.9	86.724
652	19:18:30	20.817	94.17	3.9	86.724
653	19:18:40	20.817	94.17	3.9	86.811
654	19:18:50	20.817	94.117	3.9	86.899
655	19:19:00	20.817	94.09	3.9	86.986
656	19:19:10	20.817	94.01	3.9	86.986
657	19:19:20	20.817	94.064	3.9	87.163
658	19:19:30	20.817	94.117	3.9	87.251
659	19:19:40	20.817	94.117	3.9	87.251
660	19:19:50	20.817	94.143	3.9	87.429
661	19:20:00	20.817	94.223	3.9	87.429
662	19:20:10	20.817	94.276	3.9	87.518
663	19:20:20	20.817	94.276	3.9	87.607
664	19:20:30	20.817	94.223	3.9	87.607
665	19:20:40	20.817	94.223	3.9	87.697
666	19:20:50	20.817	94.197	3.9	87.877
667	19:21:00	20.817	94.17	3.9	87.877
668	19:21:10	20.817	94.223	3.9	87.967
669	19:21:20	20.817	94.303	3.9	88.057
670	19:21:30	20.817	94.276	3.9	88.148
671	19:21:40	20.817	94.33	11.8	88.239
672	19:21:50	20.817	94.33	3.9	88.239
673	19:22:00	20.817	94.383	3.9	88.33
674	19:22:10	20.817	94.436	11.8	88.33
675	19:22:20	20.817	94.383	3.9	88.421
676	19:22:30	20.817	94.383	3.9	88.421
677	19:22:40	20.817	94.409	3.9	88.513
678	19:22:50	20.817	94.436	3.9	88.513
679	19:23:00	20.817	94.489	3.9	88.605
680	19:23:10	20.817	94.489	11.8	88.605
681	19:23:20	20.817	94.542	3.9	88.605
682	19:23:30	20.817	94.542	3.9	88.605
683	19:23:40	20.817	94.542	3.9	88.697
684	19:23:50	20.841	94.495	3.9	88.697
685	19:24:00	20.817	94.516	3.9	88.789
686	19:24:10	20.817	94.489	3.9	88.789
687	19:24:20	20.817	94.569	3.9	88.789
688	19:24:30	20.841	94.548	3.9	88.789
689	19:24:40	20.817	94.542	3.9	88.789
690	19:24:50	20.817	94.489	3.9	88.789
691	19:25:00	20.817	94.436	3.9	88.882
692	19:25:10	20.817	94.436	3.9	88.882
693	19:25:20	20.817	94.489	3.9	88.882
694	19:25:30	20.817	94.489	3.9	88.882
695	19:25:40	20.817	94.489	3.9	88.882
696	19:25:50	20.817	94.436	3.9	88.882
697	19:26:00	20.817	94.436	3.9	88.882
698	19:26:10	20.817	94.489	3.9	88.975
699	19:26:20	20.817	94.489	3.9	88.975
700	19:26:30	20.817	94.569	3.9	88.975
701	19:26:40	20.817	94.489	3.9	89.068
702	19:26:50	20.817	94.595	3.9	89.068
703	19:27:00	20.817	94.542	3.9	89.161
704	19:27:10	20.817	94.436	11.8	89.161
705	19:27:20	20.817	94.489	3.9	89.255
706	19:27:30	20.817	94.436	3.9	89.255
707	19:27:40	20.817	94.383	3.9	89.348
708	19:27:50	20.817	94.489	3.9	89.348
709	19:28:00	20.817	94.516	3.9	89.348
710	19:28:10	20.817	94.489	3.9	89.442
711	19:28:20	20.817	94.489	3.9	89.442
712	19:28:30	20.793	94.536	3.9	89.442
713	19:28:40	20.793	94.589	3.9	89.442
714	19:28:50	20.793	94.563	3.9	89.348
715	19:29:00	20.793	94.483	11.8	89.348
716	19:29:10	20.793	94.43	3.9	89.255
717	19:29:20	20.793	94.43	3.9	89.161
718	19:29:30	20.793	94.456	3.9	89.068
719	19:29:40	20.793	94.483	3.9	88.975
720	19:29:50	20.793	94.51	3.9	88.975
721	19:30:00	20.793	94.589	3.9	88.882
722	19:30:10	20.793	94.616	3.9	88.882
723	19:30:20	20.793	94.589	3.9	88.789
724	19:30:30	20.77	94.503	3.9	88.789
725	19:30:40	20.77	94.477	3.9	88.882
726	19:30:50	20.77	94.424	3.9	88.882
727	19:31:00	20.77	94.424	11.8	88.882
728	19:31:10	20.77	94.45	3.9	88.789
729	19:31:20	20.77	94.424	3.9	88.789
730	19:31:30	20.77	94.397	3.9	88.789
731	19:31:40	20.77	94.45	3.9	88.882
732	19:31:50	20.77	94.477	11.8	88.882
733	19:32:00	20.77	94.53	3.9	88.882
734	19:32:10	20.77	94.53	11.8	88.882
735	19:32:20	20.746	94.497	3.9	88.975
736	19:32:30	20.746	94.471	3.9	88.975
737	19:32:40	20.746	94.471	11.8	88.975
738	19:32:50	20.746	94.524	11.8	88.975
739	19:33:00	20.746	94.551	11.8	88.975
740	19:33:10	20.746	94.551	11.8	88.975
741	19:33:20	20.746	94.471	3.9	88.975
742	19:33:30	20.746	94.471	3.9	88.975
743	19:33:40	20.722	94.465	3.9	88.975
744	19:33:50	20.722	94.438	3.9	88.975
745	19:34:00	20.722	94.412	3.9	88.975
746	19:34:10	20.722	94.358	3.9	88.975
747	19:34:20	20.722	94.358	3.9	89.068
748	19:34:30	20.722	94.412	3.9	89.068
749	19:34:40	20.698	94.432	3.9	89.068
750	19:34:50	20.698	94.512	11.8	89.068
751	19:35:00	20.722	94.624	3.9	89.068
752	19:35:10	20.698	94.724	11.8	89.068
753	19:35:20	20.698	94.724	3.9	89.068
754	19:35:30	20.674	94.771	11.8	88.975
755	19:35:40	20.674	94.798	11.8	88.882
756	19:35:50	20.674	94.771	3.9	88.882
757	19:36:00	20.674	94.798	3.9	88.789
758	19:36:10	20.674	94.771	3.9	88.789
759	19:36:20	20.674	94.771	3.9	88.697
760	19:36:30	20.674	94.824	3.9	88.697
761	19:36:40	20.674	94.798	3.9	88.605
762	19:36:50	20.674	94.824	3.9	88.605
763	19:37:00	20.722	95.578	11.8	88.789
764	19:37:10	20.746	95.848	3.9	89.537
765	19:37:20	20.817	96.973	3.9	90.204
766	19:37:30	20.865	97.038	3.9	91.08

## Sheet: 20170507&0508_MiaoLi
Plot Title: 20034486_20170507_MiaoLi
#	Date Time, GMT+08:00	Temp, °C (LGR S/N: 20034486, SEN S/N: 20034486)	RH, % (LGR S/N: 20034486, SEN S/N: 20034486)	Intensity, Lux (LGR S/N: 20034486, SEN S/N: 20034486)	Temp, °C (LGR S/N: 20034486, SEN S/N: 20034486)	End Of File (LGR S/N: 20034486)
1	17:30:00	25.744	84.678	1974.9	61.449	BE01-LI02
2	17:30:10	25.72	84.87	1967	61.315	BE01-LI02
3	17:30:20	25.72	85.124	1959.1	61.227	BE01-LI02
4	17:30:30	25.72	85.152	1943.3	61.094	BE01-LI02
5	17:30:40	25.72	85.096	1943.3	60.962	BE01-LI02
6	17:30:50	25.695	85.175	1927.6	60.962	BE01-LI02
7	17:31:00	25.695	85.203	1919.7	60.918	BE01-LI02
8	17:31:10	25.695	85.372	1911.8	60.918	BE01-LI02
9	17:31:20	25.695	85.597	1911.8	60.918	BE01-LI02
10	17:31:30	25.671	85.62	1903.9	60.962	BE01-LI02
11	17:31:40	25.671	85.536	1896	60.918	BE01-LI02
12	17:31:50	25.671	85.536	1888.2	60.918	BE01-LI02
13	17:32:00	25.671	85.592	1880.3	60.918	BE01-LI02
14	17:32:10	25.647	85.643	1872.4	60.918	BE01-LI02
15	17:32:20	25.647	85.558	1864.5	60.962	BE01-LI02
16	17:32:30	25.647	85.53	1856.6	60.962	BE01-LI02
17	17:32:40	25.623	85.609	1848.7	60.918	BE01-LI02
18	17:32:50	25.623	85.693	1848.7	60.962	BE01-LI02
19	17:33:00	25.623	85.637	1840.9	60.962	BE01-LI02
20	17:33:10	25.623	85.862	1825.1	60.962	BE01-LI02
21	17:33:20	25.598	85.941	1825.1	60.962	BE01-LI02
22	17:33:30	25.598	85.885	1817.2	60.962	BE01-LI02
23	17:33:40	25.598	86.025	1809.3	60.962	BE01-LI02
24	17:33:50	25.574	86.076	1801.4	60.962	BE01-LI02
25	17:34:00	25.574	86.188	1793.6	60.962	BE01-LI02
26	17:34:10	25.574	86.132	1785.7	60.962	BE01-LI02
27	17:34:20	25.574	86.076	1777.8	60.962	BE01-LI02
28	17:34:30	25.55	86.126	1769.9	60.962	BE01-LI02
29	17:34:40	25.55	86.126	1762	60.962	BE01-LI02
30	17:34:50	25.525	86.121	1762	60.962	BE01-LI02
31	17:35:00	25.525	86.233	1754.1	60.962	BE01-LI02
32	17:35:10	25.525	86.345	1738.4	60.962	BE01-LI02
33	17:35:20	25.525	86.457	1730.5	60.962	BE01-LI02
34	17:35:30	25.501	86.452	1722.6	60.962	BE01-LI02
35	17:35:40	25.501	86.452	1722.6	60.962	BE01-LI02
36	17:35:50	25.477	86.362	1706.8	60.962	BE01-LI02
37	17:36:00	25.477	86.446	1706.8	60.962	BE01-LI02
38	17:36:10	25.477	86.614	1691.1	60.962	BE01-LI02
39	17:36:20	25.453	86.665	1691.1	60.962	BE01-LI02
40	17:36:30	25.453	86.581	1683.2	60.962	BE01-LI02
41	17:36:40	25.453	86.609	1675.3	60.962	BE01-LI02
42	17:36:50	25.428	86.379	1667.4	60.962	BE01-LI02
43	17:37:00	25.428	86.351	1659.5	60.962	BE01-LI02
44	17:37:10	25.428	86.435	1651.6	60.962	BE01-LI02
45	17:37:20	25.404	86.569	1643.8	60.962	BE01-LI02
46	17:37:30	25.404	86.429	1643.8	60.962	BE01-LI02
47	17:37:40	25.38	86.48	1635.9	60.962	BE01-LI02
48	17:37:50	25.38	86.62	1628	60.962	BE01-LI02
49	17:38:00	25.38	86.704	1620.1	60.962	BE01-LI02
50	17:38:10	25.355	86.754	1620.1	60.962	BE01-LI02
51	17:38:20	25.355	86.838	1604.3	60.962	BE01-LI02
52	17:38:30	25.355	86.81	1596.5	60.962	BE01-LI02
53	17:38:40	25.331	86.86	1596.5	60.962	BE01-LI02
54	17:38:50	25.331	86.916	1588.6	61.006	BE01-LI02
55	17:39:00	25.331	86.916	1580.7	61.006	BE01-LI02
56	17:39:10	25.307	86.883	1572.8	61.006	BE01-LI02
57	17:39:20	25.307	86.799	1564.9	61.05	BE01-LI02
58	17:39:30	25.307	86.855	1557	61.05	BE01-LI02
59	17:39:40	25.283	86.989	1549.2	61.05	BE01-LI02
60	17:39:50	25.283	87.073	1541.3	61.094	BE01-LI02
61	17:40:00	25.283	87.073	1533.4	61.094	BE01-LI02
62	17:40:10	25.258	87.011	1533.4	61.138	BE01-LI02
63	17:40:20	25.258	86.844	1525.5	61.182	BE01-LI02
64	17:40:30	25.258	86.844	1517.6	61.227	BE01-LI02
65	17:40:40	25.234	86.922	1509.7	61.271	BE01-LI02
66	17:40:50	25.234	86.866	1501.9	61.36	BE01-LI02
67	17:41:00	25.234	86.95	1494	61.404	BE01-LI02
68	17:41:10	25.21	87	1486.1	61.493	BE01-LI02
69	17:41:20	25.21	86.972	1486.1	61.583	BE01-LI02
70	17:41:30	25.186	87.05	1478.2	61.672	BE01-LI02
71	17:41:40	25.186	87.078	1470.3	61.672	BE01-LI02
72	17:41:50	25.186	87.246	1462.4	61.717	BE01-LI02
73	17:42:00	25.162	87.435	1454.6	61.762	BE01-LI02
74	17:42:10	25.162	87.603	1446.7	61.807	BE01-LI02
75	17:42:20	25.162	87.658	1438.8	61.852	BE01-LI02
76	17:42:30	25.137	87.68	1430.9	61.897	BE01-LI02
77	17:42:40	25.137	87.625	1423	61.942	BE01-LI02
78	17:42:50	25.137	87.485	1415.1	62.032	BE01-LI02
79	17:43:00	25.113	87.536	1415.1	62.122	BE01-LI02
80	17:43:10	25.113	87.591	1407.3	62.213	BE01-LI02
81	17:43:20	25.113	87.703	1399.4	62.304	BE01-LI02
82	17:43:30	25.113	87.647	1399.4	62.395	BE01-LI02
83	17:43:40	25.089	87.474	1391.5	62.395	BE01-LI02
84	17:43:50	25.089	87.446	1383.6	62.395	BE01-LI02
85	17:44:00	25.065	87.441	1375.7	62.395	BE01-LI02
86	17:44:10	25.065	87.608	1367.8	62.395	BE01-LI02
87	17:44:20	25.04	87.797	1359.9	62.395	BE01-LI02
88	17:44:30	25.04	87.825	1359.9	62.395	BE01-LI02
89	17:44:40	25.04	87.853	1352.1	62.395	BE01-LI02
90	17:44:50	25.04	87.964	1344.2	62.395	BE01-LI02
91	17:45:00	25.016	88.014	1344.2	62.441	BE01-LI02
92	17:45:10	25.016	87.958	1336.3	62.441	BE01-LI02
93	17:45:20	25.016	87.958	1328.4	62.441	BE01-LI02
94	17:45:30	25.016	88.153	1320.5	62.441	BE01-LI02
95	17:45:40	24.992	88.175	1312.6	62.441	BE01-LI02
96	17:45:50	24.992	88.286	1312.6	62.441	BE01-LI02
97	17:46:00	24.968	87.947	1304.8	62.441	BE01-LI02
98	17:46:10	24.968	88.03	1296.9	62.486	BE01-LI02
99	17:46:20	24.944	88.136	1289	62.486	BE01-LI02
100	17:46:30	24.944	88.219	1281.1	62.532	BE01-LI02
101	17:46:40	24.944	88.052	1281.1	62.578	BE01-LI02
102	17:46:50	24.919	87.936	1273.2	62.578	BE01-LI02
103	17:47:00	24.919	88.019	1265.3	62.669	BE01-LI02
104	17:47:10	24.919	88.102	1257.5	62.715	BE01-LI02
105	17:47:20	24.895	88.263	1249.6	62.807	BE01-LI02
106	17:47:30	24.895	88.291	1249.6	62.853	BE01-LI02
107	17:47:40	24.895	88.319	1233.8	62.946	BE01-LI02
108	17:47:50	24.895	88.319	1233.8	63.085	BE01-LI02
109	17:48:00	24.871	88.479	1225.9	63.131	BE01-LI02
110	17:48:10	24.871	88.535	1218	63.177	BE01-LI02
111	17:48:20	24.871	88.313	1210.2	63.177	BE01-LI02
112	17:48:30	24.847	88.196	1202.3	63.271	BE01-LI02
113	17:48:40	24.847	88.224	1194.4	63.317	BE01-LI02
114	17:48:50	24.847	88.141	1186.5	63.364	BE01-LI02
115	17:49:00	24.823	88.246	1186.5	63.411	BE01-LI02
116	17:49:10	24.823	88.274	1178.6	63.504	BE01-LI02
117	17:49:20	24.823	88.246	1162.9	63.598	BE01-LI02
118	17:49:30	24.798	88.241	1162.9	63.692	BE01-LI02
119	17:49:40	24.798	88.351	1155	63.834	BE01-LI02
120	17:49:50	24.798	88.49	1147.1	63.881	BE01-LI02
121	17:50:00	24.774	88.623	1147.1	63.881	BE01-LI02
122	17:50:10	24.774	88.678	1139.2	63.881	BE01-LI02
123	17:50:20	24.774	88.706	1123.4	63.881	BE01-LI02
124	17:50:30	24.75	88.7	1123.4	63.928	BE01-LI02
125	17:50:40	24.75	88.783	1115.6	63.881	BE01-LI02
126	17:50:50	24.75	88.728	1107.7	63.928	BE01-LI02
127	17:51:00	24.75	88.783	1099.8	63.928	BE01-LI02
128	17:51:10	24.726	88.833	1099.8	63.928	BE01-LI02
129	17:51:20	24.726	88.805	1084	63.928	BE01-LI02
130	17:51:30	24.726	88.805	1084	63.928	BE01-LI02
131	17:51:40	24.702	88.717	1076.1	63.928	BE01-LI02
132	17:51:50	24.702	88.883	1068.2	63.976	BE01-LI02
133	17:52:00	24.702	88.883	1060.4	63.976	BE01-LI02
134	17:52:10	24.677	88.794	1060.4	64.023	BE01-LI02
135	17:52:20	24.677	88.877	1052.5	64.07	BE01-LI02
136	17:52:30	24.677	88.932	1044.6	64.07	BE01-LI02
137	17:52:40	24.653	88.926	1036.7	64.118	BE01-LI02
138	17:52:50	24.653	88.926	1036.7	64.213	BE01-LI02
139	17:53:00	24.653	88.954	1028.8	64.261	BE01-LI02
140	17:53:10	24.653	88.926	1020.9	64.357	BE01-LI02
141	17:53:20	24.629	88.865	1020.9	64.405	BE01-LI02
142	17:53:30	24.629	88.893	1013.1	64.549	BE01-LI02
143	17:53:40	24.629	88.865	1005.2	64.645	BE01-LI02
144	17:53:50	24.605	88.998	997.3	64.693	BE01-LI02
145	17:54:00	24.605	89.026	997.3	64.693	BE01-LI02
146	17:54:10	24.605	89.108	981.5	64.741	BE01-LI02
147	17:54:20	24.605	89.246	981.5	64.79	BE01-LI02
148	17:54:30	24.581	89.351	973.6	64.838	BE01-LI02
149	17:54:40	24.581	89.406	965.8	64.887	BE01-LI02
150	17:54:50	24.581	89.517	965.8	64.935	BE01-LI02
151	17:55:00	24.581	89.544	957.9	65.033	BE01-LI02
152	17:55:10	24.581	89.572	950	65.13	BE01-LI02
153	17:55:20	24.557	89.511	950	65.228	BE01-LI02
154	17:55:30	24.557	89.511	942.1	65.375	BE01-LI02
155	17:55:40	24.557	89.401	934.2	65.424	BE01-LI02
156	17:55:50	24.532	89.395	926.3	65.424	BE01-LI02
157	17:56:00	24.532	89.395	926.3	65.473	BE01-LI02
158	17:56:10	24.532	89.395	918.5	65.473	BE01-LI02
159	17:56:20	24.508	89.499	910.6	65.473	BE01-LI02
160	17:56:30	24.508	89.499	910.6	65.424	BE01-LI02
161	17:56:40	24.508	89.499	902.7	65.473	BE01-LI02
162	17:56:50	24.508	89.554	894.8	65.473	BE01-LI02
163	17:57:00	24.484	89.604	886.9	65.473	BE01-LI02
164	17:57:10	24.484	89.631	886.9	65.473	BE01-LI02
165	17:57:20	24.484	89.686	879	65.473	BE01-LI02
166	17:57:30	24.46	89.763	879	65.473	BE01-LI02
167	17:57:40	24.46	89.846	871.2	65.473	BE01-LI02
168	17:57:50	24.46	89.818	863.3	65.523	BE01-LI02
169	17:58:00	24.46	89.818	855.4	65.523	BE01-LI02
170	17:58:10	24.46	89.818	847.5	65.523	BE01-LI02
171	17:58:20	24.436	89.702	847.5	65.523	BE01-LI02
172	17:58:30	24.436	89.702	839.6	65.523	BE01-LI02
173	17:58:40	24.436	89.868	839.6	65.523	BE01-LI02
174	17:58:50	24.436	89.923	831.7	65.523	BE01-LI02
175	17:59:00	24.436	89.978	823.9	65.572	BE01-LI02
176	17:59:10	24.412	89.999	816	65.572	BE01-LI02
177	17:59:20	24.412	90.027	816	65.572	BE01-LI02
178	17:59:30	24.412	90.027	808.1	65.621	BE01-LI02
179	17:59:40	24.412	90.027	800.2	65.671	BE01-LI02
180	17:59:50	24.388	90.076	792.3	65.72	BE01-LI02	time	Temp-av	temp-std	RH-av	Rh-std	Intensity, Lux-av	Int-std		interval
181	18:00:00	24.388	90.076	792.3	65.77	BE01-LI02	before	23.7	0.37	91.65	0.93	289.37	233.33	2017-05-07	18:00-18:39
182	18:00:10	24.388	90.048	784.4	65.82	BE01-LI02
183	18:00:20	24.363	89.795	776.6	65.869	BE01-LI02
184	18:00:30	24.363	89.85	776.6	65.969	BE01-LI02
185	18:00:40	24.363	89.96	768.7	66.019	BE01-LI02
186	18:00:50	24.363	90.015	760.8	66.119	BE01-LI02
187	18:01:00	24.339	90.037	745	66.219	BE01-LI02
188	18:01:10	24.339	89.927	752.9	66.269	BE01-LI02
189	18:01:20	24.339	89.872	745	66.269	BE01-LI02
190	18:01:30	24.315	89.894	705.6	66.32	BE01-LI02
191	18:01:40	24.315	89.949	737.1	66.32	BE01-LI02
192	18:01:50	24.315	89.976	729.2	66.37	BE01-LI02
193	18:02:00	24.291	90.053	721.4	66.42	BE01-LI02
194	18:02:10	24.291	90.053	713.5	66.471	BE01-LI02
195	18:02:20	24.291	89.97	713.5	66.521	BE01-LI02
196	18:02:30	24.291	89.943	705.6	66.572	BE01-LI02
197	18:02:40	24.267	89.882	705.6	66.673	BE01-LI02
198	18:02:50	24.243	89.904	697.7	66.724	BE01-LI02
199	18:03:00	24.243	89.876	689.8	66.826	BE01-LI02
200	18:03:10	24.243	89.904	689.8	66.928	BE01-LI02
201	18:03:20	24.219	89.926	681.9	67.03	BE01-LI02
202	18:03:30	24.219	89.981	674.1	67.03	BE01-LI02
203	18:03:40	24.219	89.953	666.2	67.03	BE01-LI02
204	18:03:50	24.219	89.981	658.3	67.03	BE01-LI02
205	18:04:00	24.219	90.063	658.3	67.082	BE01-LI02
206	18:04:10	24.195	90.14	650.4	67.082	BE01-LI02
207	18:04:20	24.195	90.249	642.5	67.082	BE01-LI02
208	18:04:30	24.195	90.332	642.5	67.082	BE01-LI02
209	18:04:40	24.171	90.353	634.6	67.082	BE01-LI02
210	18:04:50	24.171	90.408	626.8	67.082	BE01-LI02
211	18:05:00	24.171	90.436	626.8	67.082	BE01-LI02
212	18:05:10	24.171	90.463	618.9	67.082	BE01-LI02
213	18:05:20	24.171	90.49	611	67.082	BE01-LI02
214	18:05:30	24.146	90.539	611	67.082	BE01-LI02
215	18:05:40	24.146	90.567	603.1	67.082	BE01-LI02
216	18:05:50	24.146	90.594	595.2	67.082	BE01-LI02
217	18:06:00	24.146	90.622	595.2	67.133	BE01-LI02
218	18:06:10	24.146	90.649	587.3	67.133	BE01-LI02
219	18:06:20	24.122	90.671	579.5	67.184	BE01-LI02
220	18:06:30	24.122	90.671	579.5	67.184	BE01-LI02
221	18:06:40	24.122	90.725	571.6	67.236	BE01-LI02
222	18:06:50	24.122	90.753	571.6	67.287	BE01-LI02
223	18:07:00	24.122	90.78	563.7	67.339	BE01-LI02
224	18:07:10	24.098	90.829	555.8	67.443	BE01-LI02
225	18:07:20	24.098	90.884	547.9	67.494	BE01-LI02
226	18:07:30	24.098	90.911	547.9	67.546	BE01-LI02
227	18:07:40	24.098	90.911	540	67.702	BE01-LI02
228	18:07:50	24.074	90.933	540	67.807	BE01-LI02
229	18:08:00	24.074	90.987	532.2	67.859	BE01-LI02
230	18:08:10	24.074	90.987	532.2	67.912	BE01-LI02
231	18:08:20	24.074	90.85	524.3	67.964	BE01-LI02
232	18:08:30	24.074	90.878	524.3	68.069	BE01-LI02
233	18:08:40	24.05	90.927	516.4	68.122	BE01-LI02
234	18:08:50	24.05	90.927	508.5	68.175	BE01-LI02
235	18:09:00	24.05	90.927	500.6	68.28	BE01-LI02
236	18:09:10	24.026	90.921	500.6	68.386	BE01-LI02
237	18:09:20	24.026	90.948	492.7	68.493	BE01-LI02
238	18:09:30	24.026	90.976	484.9	68.653	BE01-LI02
239	18:09:40	24.026	91.003	484.9	68.706	BE01-LI02
240	18:09:50	24.026	91.003	477	68.706	BE01-LI02
241	18:10:00	24.002	90.97	477	68.76	BE01-LI02
242	18:10:10	24.002	90.86	469.1	68.76	BE01-LI02
243	18:10:20	24.002	90.751	461.2	68.76	BE01-LI02
244	18:10:30	24.002	90.696	461.2	68.76	BE01-LI02
245	18:10:40	23.978	90.8	453.3	68.76	BE01-LI02
246	18:10:50	23.978	90.909	453.3	68.76	BE01-LI02
247	18:11:00	23.978	90.936	445.4	68.76	BE01-LI02
248	18:11:10	23.978	90.991	437.5	68.76	BE01-LI02
249	18:11:20	23.978	91.018	429.7	68.76	BE01-LI02
250	18:11:30	23.978	91.1	429.7	68.76	BE01-LI02
251	18:11:40	23.954	91.149	421.8	68.76	BE01-LI02
252	18:11:50	23.954	91.177	421.8	68.813	BE01-LI02
253	18:12:00	23.954	91.231	413.9	68.813	BE01-LI02
254	18:12:10	23.954	91.258	413.9	68.813	BE01-LI02
255	18:12:20	23.954	91.258	406	68.813	BE01-LI02
256	18:12:30	23.93	91.198	398.1	68.867	BE01-LI02
257	18:12:40	23.93	91.171	398.1	68.921	BE01-LI02
258	18:12:50	23.93	91.225	390.2	68.921	BE01-LI02
259	18:13:00	23.905	91.274	390.2	68.975	BE01-LI02
260	18:13:10	23.905	91.356	358.7	69.028	BE01-LI02
261	18:13:20	23.905	91.438	382.4	69.137	BE01-LI02
262	18:13:30	23.905	91.492	374.5	69.191	BE01-LI02
263	18:13:40	23.905	91.492	374.5	69.299	BE01-LI02
264	18:13:50	23.905	91.438	366.6	69.354	BE01-LI02
265	18:14:00	23.881	91.405	366.6	69.463	BE01-LI02
266	18:14:10	23.881	91.405	358.7	69.517	BE01-LI02
267	18:14:20	23.881	91.268	350.8	69.627	BE01-LI02
268	18:14:30	23.857	91.126	350.8	69.682	BE01-LI02
269	18:14:40	23.857	91.262	342.9	69.682	BE01-LI02
270	18:14:50	23.857	91.371	342.9	69.737	BE01-LI02
271	18:15:00	23.857	91.399	335.1	69.792	BE01-LI02
272	18:15:10	23.857	91.426	335.1	69.792	BE01-LI02
273	18:15:20	23.833	91.42	327.2	69.847	BE01-LI02
274	18:15:30	23.833	91.366	327.2	69.902	BE01-LI02
275	18:15:40	23.833	91.311	319.3	70.012	BE01-LI02
276	18:15:50	23.833	91.338	319.3	70.068	BE01-LI02
277	18:16:00	23.809	91.36	311.4	70.179	BE01-LI02
278	18:16:10	23.809	91.387	303.5	70.29	BE01-LI02
279	18:16:20	23.785	91.354	303.5	70.402	BE01-LI02
280	18:16:30	23.785	91.381	295.6	70.458	BE01-LI02
281	18:16:40	23.785	91.408	295.6	70.458	BE01-LI02
282	18:16:50	23.785	91.463	287.8	70.514	BE01-LI02
283	18:17:00	23.785	91.49	287.8	70.514	BE01-LI02
284	18:17:10	23.761	91.511	287.8	70.514	BE01-LI02
285	18:17:20	23.761	91.566	279.9	70.514	BE01-LI02
286	18:17:30	23.761	91.648	272	70.514	BE01-LI02
287	18:17:40	23.761	91.648	272	70.514	BE01-LI02
288	18:17:50	23.761	91.729	272	70.514	BE01-LI02
289	18:18:00	23.761	91.729	264.1	70.514	BE01-LI02
290	18:18:10	23.737	91.615	264.1	70.514	BE01-LI02
291	18:18:20	23.737	91.669	256.2	70.514	BE01-LI02
292	18:18:30	23.737	91.723	256.2	70.514	BE01-LI02
293	18:18:40	23.737	91.696	256.2	70.57	BE01-LI02
294	18:18:50	23.737	91.723	248.3	70.57	BE01-LI02
295	18:19:00	23.713	91.718	248.3	70.57	BE01-LI02
296	18:19:10	23.713	91.745	240.5	70.57	BE01-LI02
297	18:19:20	23.713	91.772	240.5	70.57	BE01-LI02
298	18:19:30	23.713	91.826	240.5	70.57	BE01-LI02
299	18:19:40	23.689	91.875	232.6	70.626	BE01-LI02
300	18:19:50	23.689	91.875	224.7	70.626	BE01-LI02
301	18:20:00	23.689	91.875	224.7	70.683	BE01-LI02
302	18:20:10	23.689	91.875	224.7	70.683	BE01-LI02
303	18:20:20	23.689	91.875	216.8	70.739	BE01-LI02
304	18:20:30	23.665	91.896	216.8	70.796	BE01-LI02
305	18:20:40	23.665	91.978	208.9	70.852	BE01-LI02
306	18:20:50	23.665	92.032	208.9	70.909	BE01-LI02
307	18:21:00	23.665	92.032	208.9	70.966	BE01-LI02
308	18:21:10	23.665	91.978	201	71.022	BE01-LI02
309	18:21:20	23.641	91.945	201	71.079	BE01-LI02
310	18:21:30	23.641	91.863	193.2	71.193	BE01-LI02
311	18:21:40	23.641	91.809	193.2	71.251	BE01-LI02
312	18:21:50	23.641	91.809	193.2	71.308	BE01-LI02
313	18:22:00	23.641	91.754	193.2	71.365	BE01-LI02
314	18:22:10	23.641	91.781	185.3	71.365	BE01-LI02
315	18:22:20	23.617	91.857	185.3	71.365	BE01-LI02
316	18:22:30	23.617	91.912	177.4	71.423	BE01-LI02
317	18:22:40	23.617	91.966	177.4	71.423	BE01-LI02
318	18:22:50	23.617	91.966	169.5	71.423	BE01-LI02
319	18:23:00	23.593	91.96	169.5	71.423	BE01-LI02
320	18:23:10	23.593	91.96	169.5	71.423	BE01-LI02
321	18:23:20	23.593	92.014	161.6	71.48	BE01-LI02
322	18:23:30	23.569	92.008	161.6	71.538	BE01-LI02
323	18:23:40	23.569	92.008	161.6	71.595	BE01-LI02
324	18:23:50	23.569	92.008	153.7	71.653	BE01-LI02
325	18:24:00	23.569	92.008	153.7	71.653	BE01-LI02
326	18:24:10	23.569	92.063	153.7	71.711	BE01-LI02
327	18:24:20	23.545	92.084	153.7	71.827	BE01-LI02
328	18:24:30	23.545	92.084	145.8	71.885	BE01-LI02
329	18:24:40	23.545	92.111	145.8	72.002	BE01-LI02
330	18:24:50	23.545	92.165	145.8	72.06	BE01-LI02
331	18:25:00	23.545	92.165	138	72.177	BE01-LI02
332	18:25:10	23.521	92.16	138	72.295	BE01-LI02
333	18:25:20	23.521	92.105	138	72.295	BE01-LI02
334	18:25:30	23.521	92.16	130.1	72.354	BE01-LI02
335	18:25:40	23.521	92.214	130.1	72.354	BE01-LI02
336	18:25:50	23.497	92.126	130.1	72.413	BE01-LI02
337	18:26:00	23.497	92.045	122.2	72.413	BE01-LI02
338	18:26:10	23.497	92.099	122.2	72.413	BE01-LI02
339	18:26:20	23.497	92.099	122.2	72.413	BE01-LI02
340	18:26:30	23.472	92.121	122.2	72.413	BE01-LI02
341	18:26:40	23.472	92.093	114.3	72.413	BE01-LI02
342	18:26:50	23.472	92.093	114.3	72.413	BE01-LI02
343	18:27:00	23.472	92.039	114.3	72.413	BE01-LI02
344	18:27:10	23.448	92.087	106.4	72.413	BE01-LI02
345	18:27:20	23.448	92.087	106.4	72.413	BE01-LI02
346	18:27:30	23.448	92.142	106.4	72.413	BE01-LI02
347	18:27:40	23.424	92.082	106.4	72.472	BE01-LI02
348	18:27:50	23.424	92.244	98.5	72.413	BE01-LI02
349	18:28:00	23.424	92.271	98.5	72.413	BE01-LI02
350	18:28:10	23.424	92.271	98.5	72.472	BE01-LI02
351	18:28:20	23.4	92.211	98.5	72.472	BE01-LI02
352	18:28:30	23.4	92.13	90.7	72.472	BE01-LI02
353	18:28:40	23.4	92.076	90.7	72.472	BE01-LI02
354	18:28:50	23.4	92.13	90.7	72.472	BE01-LI02
355	18:29:00	23.376	92.178	82.8	72.472	BE01-LI02
356	18:29:10	23.376	92.178	82.8	72.472	BE01-LI02
357	18:29:20	23.376	92.287	82.8	72.472	BE01-LI02
358	18:29:30	23.376	92.314	82.8	72.472	BE01-LI02
359	18:29:40	23.376	92.341	82.8	72.531	BE01-LI02
360	18:29:50	23.352	92.335	82.8	72.531	BE01-LI02
361	18:30:00	23.352	92.335	74.9	72.59	BE01-LI02
362	18:30:10	23.352	92.389	74.9	72.59	BE01-LI02
363	18:30:20	23.352	92.443	74.9	72.649	BE01-LI02
364	18:30:30	23.352	92.308	74.9	72.709	BE01-LI02
365	18:30:40	23.328	92.112	74.9	72.828	BE01-LI02
366	18:30:50	23.328	92.058	67	72.888	BE01-LI02
367	18:31:00	23.328	91.976	67	72.947	BE01-LI02
368	18:31:10	23.304	91.943	67	72.947	BE01-LI02
369	18:31:20	23.304	91.998	67	73.007	BE01-LI02
370	18:31:30	23.304	92.052	59.1	73.067	BE01-LI02
371	18:31:40	23.304	92.16	59.1	73.067	BE01-LI02
372	18:31:50	23.28	92.209	59.1	73.127	BE01-LI02
373	18:32:00	23.28	92.29	59.1	73.188	BE01-LI02
374	18:32:10	23.28	92.317	59.1	73.188	BE01-LI02
375	18:32:20	23.28	92.317	59.1	73.248	BE01-LI02
376	18:32:30	23.28	92.371	59.1	73.248	BE01-LI02
377	18:32:40	23.256	92.393	51.2	73.248	BE01-LI02
378	18:32:50	23.28	92.426	51.2	73.308	BE01-LI02
379	18:33:00	23.256	92.528	51.2	73.308	BE01-LI02
380	18:33:10	23.256	92.528	51.2	73.308	BE01-LI02
381	18:33:20	23.256	92.474	51.2	73.369	BE01-LI02
382	18:33:30	23.256	92.447	43.4	73.369	BE01-LI02
383	18:33:40	23.232	92.468	43.4	73.429	BE01-LI02
384	18:33:50	23.232	92.549	43.4	73.429	BE01-LI02
385	18:34:00	23.232	92.576	43.4	73.49	BE01-LI02
386	18:34:10	23.232	92.576	43.4	73.551	BE01-LI02
387	18:34:20	23.232	92.63	43.4	73.612	BE01-LI02
388	18:34:30	23.232	92.738	35.5	73.612	BE01-LI02
389	18:34:40	23.232	92.793	35.5	73.734	BE01-LI02
390	18:34:50	23.232	92.847	35.5	73.856	BE01-LI02
391	18:35:00	23.232	92.847	35.5	73.979	BE01-LI02
392	18:35:10	23.208	92.787	35.5	74.164	BE01-LI02
393	18:35:20	23.208	92.787	35.5	74.226	BE01-LI02
394	18:35:30	23.208	92.895	35.5	74.226	BE01-LI02
395	18:35:40	23.208	92.895	35.5	74.288	BE01-LI02
396	18:35:50	23.208	92.976	35.5	74.35	BE01-LI02
397	18:36:00	23.208	93.003	27.6	74.35	BE01-LI02
398	18:36:10	23.208	93.003	27.6	74.412	BE01-LI02
399	18:36:20	23.184	93.051	27.6	74.412	BE01-LI02
400	18:36:30	23.184	93.051	27.6	74.474	BE01-LI02
401	18:36:40	23.184	93.132	27.6	74.537	BE01-LI02
402	18:36:50	23.184	93.159	27.6	74.537	BE01-LI02
403	18:37:00	23.184	93.186	27.6	74.599	BE01-LI02
404	18:37:10	23.184	93.267	27.6	74.662	BE01-LI02
405	18:37:20	23.184	93.294	27.6	74.725	BE01-LI02
406	18:37:30	23.184	93.348	27.6	74.85	BE01-LI02
407	18:37:40	23.184	93.267	27.6	74.914	BE01-LI02
408	18:37:50	23.16	93.153	19.7	75.04	BE01-LI02
409	18:38:00	23.16	93.018	19.7	75.103	BE01-LI02
410	18:38:10	23.16	92.964	19.7	75.167	BE01-LI02
411	18:38:20	23.16	93.018	19.7	75.23	BE01-LI02
412	18:38:30	23.136	93.093	19.7	75.23	BE01-LI02
413	18:38:40	23.136	93.201	19.7	75.294	BE01-LI02
414	18:38:50	23.136	93.255	19.7	75.294	BE01-LI02
415	18:39:00	23.136	93.336	19.7	75.358	BE01-LI02
416	18:39:10	23.136	93.363	19.7	75.422	BE01-LI02
417	18:39:20	23.136	93.336	19.7	75.486	BE01-LI02
418	18:39:30	23.112	93.357	19.7	75.55	BE01-LI02
419	18:39:40	23.112	93.357	19.7	75.614	BE01-LI02
420	18:39:50	23.112	93.357	19.7	75.743	BE01-LI02	棲地條件	Temp-av	temp-std	RH-av	Rh-std	Intensity, Lux-av	Int-std		interval
421	18:40:00	23.112	93.411	19.7	75.807	flash	flash	22.67	0.4	94.82	1.23	6.12	3.61	2017-05-07	18:40-19:40
422	18:40:10	23.112	93.411	11.8	75.937
423	18:40:20	23.112	93.437	11.8	76.067
424	18:40:30	23.088	93.458	11.8	76.197
425	18:40:40	23.088	93.458	11.8	76.197
426	18:40:50	23.088	93.458	11.8	76.263
427	18:41:00	23.088	93.405	11.8	76.263
428	18:41:10	23.088	93.351	11.8	76.328
429	18:41:20	23.088	93.351	11.8	76.394
430	18:41:30	23.064	93.345	11.8	76.394
431	18:41:40	23.064	93.345	11.8	76.394
432	18:41:50	23.064	93.345	11.8	76.46
433	18:42:00	23.064	93.264	11.8	76.46
434	18:42:10	23.064	93.237	11.8	76.394
435	18:42:20	23.064	93.318	11.8	76.525
436	18:42:30	23.04	93.339	11.8	76.591
437	18:42:40	23.04	93.419	11.8	76.591
438	18:42:50	23.04	93.5	11.8	76.525
439	18:43:00	23.04	93.527	11.8	76.46
440	18:43:10	23.04	93.554	11.8	76.46
441	18:43:20	23.04	93.554	11.8	76.46
442	18:43:30	23.016	93.548	11.8	76.525
443	18:43:40	23.016	93.602	11.8	76.525
444	18:43:50	23.016	93.656	3.9	76.525
445	18:44:00	23.016	93.71	11.8	76.591
446	18:44:10	23.016	93.763	11.8	76.591
447	18:44:20	23.016	93.763	11.8	76.591
448	18:44:30	23.016	93.817	11.8	76.657
449	18:44:40	22.992	93.838	11.8	76.724
450	18:44:50	22.992	93.811	11.8	76.79
451	18:45:00	22.992	93.784	3.9	76.856
452	18:45:10	22.992	93.811	11.8	76.923
453	18:45:20	22.992	93.838	3.9	76.99
454	18:45:30	22.992	93.811	3.9	77.056
455	18:45:40	22.992	93.757	11.8	77.123
456	18:45:50	22.968	93.751	3.9	77.19
457	18:46:00	22.968	93.724	11.8	77.258
458	18:46:10	22.968	93.671	11.8	77.258
459	18:46:20	22.968	93.617	11.8	77.258
460	18:46:30	22.944	93.53	3.9	77.258
461	18:46:40	22.944	93.557	3.9	77.258
462	18:46:50	22.944	93.638	3.9	77.258
463	18:47:00	22.944	93.718	3.9	77.258
464	18:47:10	22.944	93.691	3.9	77.258
465	18:47:20	22.944	93.745	3.9	77.325
466	18:47:30	22.92	93.739	3.9	77.325
467	18:47:40	22.92	93.766	3.9	77.392
468	18:47:50	22.92	93.82	3.9	77.46
469	18:48:00	22.92	93.874	3.9	77.527
470	18:48:10	22.92	93.712	3.9	77.663
471	18:48:20	22.92	93.632	11.8	77.663
472	18:48:30	22.896	93.599	11.8	77.731
473	18:48:40	22.896	93.599	3.9	77.731
474	18:48:50	22.896	93.679	3.9	77.799
475	18:49:00	22.896	93.787	3.9	77.868
476	18:49:10	22.896	93.841	3.9	77.868
477	18:49:20	22.896	93.948	3.9	77.936
478	18:49:30	22.872	93.969	3.9	78.073
479	18:49:40	22.872	93.942	3.9	78.142
480	18:49:50	22.872	93.996	3.9	78.211
481	18:50:00	22.872	93.996	3.9	78.28
482	18:50:10	22.872	93.996	11.8	78.349
483	18:50:20	22.872	93.969	3.9	78.418
484	18:50:30	22.872	93.942	11.8	78.418
485	18:50:40	22.848	93.99	3.9	78.488
486	18:50:50	22.848	93.99	3.9	78.488
487	18:51:00	22.848	93.99	3.9	78.558
488	18:51:10	22.848	93.99	3.9	78.558
489	18:51:20	22.848	93.99	3.9	78.558
490	18:51:30	22.824	93.984	3.9	78.627
491	18:51:40	22.824	93.984	3.9	78.627
492	18:51:50	22.824	93.984	11.8	78.627
493	18:52:00	22.824	93.984	3.9	78.627
494	18:52:10	22.8	93.924	3.9	78.627
495	18:52:20	22.8	93.978	3.9	78.627
496	18:52:30	22.8	93.978	3.9	78.627
497	18:52:40	22.8	93.978	3.9	78.627
498	18:52:50	22.8	93.924	3.9	78.627
499	18:53:00	22.8	93.978	11.8	78.627
500	18:53:10	22.776	93.999	3.9	78.627
501	18:53:20	22.776	94.052	3.9	78.627
502	18:53:30	22.776	94.052	11.8	78.627
503	18:53:40	22.776	94.079	3.9	78.697
504	18:53:50	22.753	94.073	3.9	78.697
505	18:54:00	22.753	94.1	3.9	78.697
506	18:54:10	22.753	94.18	3.9	78.767
507	18:54:20	22.753	94.18	3.9	78.767
508	18:54:30	22.753	94.207	3.9	78.837
509	18:54:40	22.753	94.234	3.9	78.837
510	18:54:50	22.729	94.228	3.9	78.907
511	18:55:00	22.729	94.201	3.9	78.978
512	18:55:10	22.729	94.228	3.9	79.048
513	18:55:20	22.729	94.174	3.9	79.048
514	18:55:30	22.729	94.174	11.8	79.119
515	18:55:40	22.729	94.174	3.9	79.19
516	18:55:50	22.729	94.228	3.9	79.261
517	18:56:00	22.705	94.222	3.9	79.332
518	18:56:10	22.705	94.275	3.9	79.332
519	18:56:20	22.705	94.249	3.9	79.403
520	18:56:30	22.705	94.275	3.9	79.403
521	18:56:40	22.705	94.275	11.8	79.474
522	18:56:50	22.705	94.275	3.9	79.474
523	18:57:00	22.705	94.249	11.8	79.546
524	18:57:10	22.681	94.243	3.9	79.546
525	18:57:20	22.681	94.216	3.9	79.618
526	18:57:30	22.681	94.216	3.9	79.618
527	18:57:40	22.681	94.216	3.9	79.689
528	18:57:50	22.681	94.162	3.9	79.689
529	18:58:00	22.681	94.162	11.8	79.761
530	18:58:10	22.681	94.082	11.8	79.761
531	18:58:20	22.657	93.968	3.9	79.761
532	18:58:30	22.657	93.995	3.9	79.761
533	18:58:40	22.657	94.076	3.9	79.761
534	18:58:50	22.657	94.156	3.9	79.761
535	18:59:00	22.657	94.263	3.9	79.761
536	18:59:10	22.657	94.317	3.9	79.833
537	18:59:20	22.657	94.371	3.9	79.905
538	18:59:30	22.657	94.424	3.9	79.978
539	18:59:40	22.657	94.451	11.8	80.05
540	18:59:50	22.657	94.478	3.9	80.123
541	19:00:00	22.657	94.531	3.9	80.196
542	19:00:10	22.633	94.525	3.9	80.342
543	19:00:20	22.633	94.525	11.8	80.415
544	19:00:30	22.633	94.579	3.9	80.488
545	19:00:40	22.633	94.605	11.8	80.562
546	19:00:50	22.633	94.632	3.9	80.635
547	19:01:00	22.633	94.605	3.9	80.709
548	19:01:10	22.633	94.579	3.9	80.783
549	19:01:20	22.633	94.579	3.9	80.857
550	19:01:30	22.609	94.546	3.9	81.006
551	19:01:40	22.609	94.573	3.9	81.006
552	19:01:50	22.609	94.626	3.9	81.081
553	19:02:00	22.609	94.653	3.9	81.155
554	19:02:10	22.609	94.68	3.9	81.23
555	19:02:20	22.609	94.68	3.9	81.23
556	19:02:30	22.609	94.68	3.9	81.305
557	19:02:40	22.609	94.733	11.8	81.38
558	19:02:50	22.585	94.673	3.9	81.456
559	19:03:00	22.585	94.673	3.9	81.531
560	19:03:10	22.585	94.7	3.9	81.683
561	19:03:20	22.585	94.727	3.9	81.759
562	19:03:30	22.585	94.673	3.9	81.835
563	19:03:40	22.585	94.673	3.9	81.835
564	19:03:50	22.585	94.593	3.9	82.064
565	19:04:00	22.561	94.56	3.9	82.218
566	19:04:10	22.561	94.56	3.9	82.372
567	19:04:20	22.561	94.56	3.9	82.45
568	19:04:30	22.561	94.56	3.9	82.527
569	19:04:40	22.561	94.56	3.9	82.527
570	19:04:50	22.537	94.554	3.9	82.527
571	19:05:00	22.537	94.554	3.9	82.527
572	19:05:10	22.537	94.608	3.9	82.527
573	19:05:20	22.537	94.661	3.9	82.527
574	19:05:30	22.537	94.715	3.9	82.527
575	19:05:40	22.537	94.741	11.8	82.605
576	19:05:50	22.537	94.715	11.8	82.605
577	19:06:00	22.513	94.655	11.8	82.683
578	19:06:10	22.513	94.602	11.8	82.683
579	19:06:20	22.513	94.602	3.9	82.683
580	19:06:30	22.513	94.655	3.9	82.683
581	19:06:40	22.513	94.682	3.9	82.605
582	19:06:50	22.513	94.735	3.9	82.605
583	19:07:00	22.513	94.789	11.8	82.605
584	19:07:10	22.513	94.842	3.9	82.605
585	19:07:20	22.489	94.809	3.9	82.605
586	19:07:30	22.489	94.783	3.9	82.605
587	19:07:40	22.489	94.809	3.9	82.683
588	19:07:50	22.489	94.836	3.9	82.761
589	19:08:00	22.489	94.863	3.9	82.839
590	19:08:10	22.489	94.863	11.8	82.918
591	19:08:20	22.489	94.863	3.9	82.996
592	19:08:30	22.465	94.883	3.9	82.996
593	19:08:40	22.465	94.964	3.9	83.075
594	19:08:50	22.465	94.964	3.9	83.075
595	19:09:00	22.465	94.964	11.8	83.154
596	19:09:10	22.465	94.964	3.9	83.154
597	19:09:20	22.441	94.904	3.9	83.154
598	19:09:30	22.441	94.851	3.9	83.233
599	19:09:40	22.441	94.797	3.9	83.154
600	19:09:50	22.441	94.797	11.8	83.154
601	19:10:00	22.441	94.77	3.9	83.154
602	19:10:10	22.441	94.797	3.9	83.154
603	19:10:20	22.441	94.797	11.8	83.075
604	19:10:30	22.417	94.818	3.9	83.075
605	19:10:40	22.417	94.818	11.8	83.075
606	19:10:50	22.417	94.845	3.9	83.075
607	19:11:00	22.417	94.791	3.9	82.996
608	19:11:10	22.417	94.738	3.9	82.996
609	19:11:20	22.393	94.732	3.9	82.996
610	19:11:30	22.417	94.764	3.9	82.918
611	19:11:40	22.393	94.785	3.9	82.918
612	19:11:50	22.393	94.838	3.9	82.918
613	19:12:00	22.393	94.838	11.8	82.918
614	19:12:10	22.393	94.892	3.9	82.918
615	19:12:20	22.393	94.945	3.9	82.918
616	19:12:30	22.393	94.972	3.9	82.918
617	19:12:40	22.393	94.999	3.9	82.918
618	19:12:50	22.393	95.052	3.9	82.918
619	19:13:00	22.393	95.052	11.8	82.918
620	19:13:10	22.393	95.105	11.8	82.918
621	19:13:20	22.393	95.132	3.9	82.996
622	19:13:30	22.393	95.159	11.8	82.996
623	19:13:40	22.393	95.159	3.9	82.996
624	19:13:50	22.393	95.159	3.9	82.996
625	19:14:00	22.369	95.179	3.9	82.996
626	19:14:10	22.393	95.185	11.8	83.075
627	19:14:20	22.393	95.159	11.8	83.075
628	19:14:30	22.369	95.126	3.9	83.075
629	19:14:40	22.369	95.072	3.9	83.154
630	19:14:50	22.369	95.046	3.9	83.075
631	19:15:00	22.369	95.019	3.9	83.075
632	19:15:10	22.345	95.013	3.9	83.154
633	19:15:20	22.345	94.986	11.8	83.154
634	19:15:30	22.345	95.013	3.9	83.154
635	19:15:40	22.345	95.04	11.8	83.154
636	19:15:50	22.345	95.04	11.8	83.154
637	19:16:00	22.345	95.04	3.9	83.154
638	19:16:10	22.345	95.093	3.9	83.154
639	19:16:20	22.345	95.093	3.9	83.154
640	19:16:30	22.345	95.12	11.8	83.233
641	19:16:40	22.345	95.146	11.8	83.233
642	19:16:50	22.345	95.12	11.8	83.233
643	19:17:00	22.345	95.2	3.9	83.233
644	19:17:10	22.321	95.22	11.8	83.312
645	19:17:20	22.321	95.247	3.9	83.312
646	19:17:30	22.321	95.247	3.9	83.312
647	19:17:40	22.321	95.247	3.9	83.312
648	19:17:50	22.321	95.194	11.8	83.392
649	19:18:00	22.298	95.107	3.9	83.392
650	19:18:10	22.298	95.027	11.8	83.392
651	19:18:20	22.298	94.921	3.9	83.392
652	19:18:30	22.298	94.921	11.8	83.312
653	19:18:40	22.298	94.894	3.9	83.312
654	19:18:50	22.298	94.894	11.8	83.233
655	19:19:00	22.274	94.915	3.9	83.233
656	19:19:10	22.274	94.968	3.9	83.154
657	19:19:20	22.274	94.995	3.9	83.154
658	19:19:30	22.274	95.021	3.9	83.154
659	19:19:40	22.25	95.015	11.8	83.154
660	19:19:50	22.25	95.095	3.9	83.154
661	19:20:00	22.25	95.122	11.8	83.154
662	19:20:10	22.25	95.122	11.8	83.154
663	19:20:20	22.25	95.122	3.9	83.233
664	19:20:30	22.25	95.095	3.9	83.233
665	19:20:40	22.25	95.069	11.8	83.233
666	19:20:50	22.25	95.069	3.9	83.312
667	19:21:00	22.226	95.116	11.8	83.312
668	19:21:10	22.226	95.116	3.9	83.312
669	19:21:20	22.226	95.142	3.9	83.312
670	19:21:30	22.226	95.169	3.9	83.312
671	19:21:40	22.226	95.222	3.9	83.312
672	19:21:50	22.226	95.276	3.9	83.392
673	19:22:00	22.226	95.276	3.9	83.392
674	19:22:10	22.226	95.276	3.9	83.392
675	19:22:20	22.226	95.276	3.9	83.392
676	19:22:30	22.226	95.329	3.9	83.392
677	19:22:40	22.226	95.355	3.9	83.472
678	19:22:50	22.226	95.382	3.9	83.472
679	19:23:00	22.226	95.382	11.8	83.472
680	19:23:10	22.202	95.376	3.9	83.551
681	19:23:20	22.202	95.323	3.9	83.551
682	19:23:30	22.202	95.269	11.8	83.551
683	19:23:40	22.202	95.323	3.9	83.551
684	19:23:50	22.202	95.376	3.9	83.472
685	19:24:00	22.202	95.349	3.9	83.551
686	19:24:10	22.202	95.323	3.9	83.551
687	19:24:20	22.202	95.323	3.9	83.472
688	19:24:30	22.178	95.317	3.9	83.472
689	19:24:40	22.178	95.29	11.8	83.472
690	19:24:50	22.178	95.21	11.8	83.472
691	19:25:00	22.178	95.183	3.9	83.472
692	19:25:10	22.178	95.157	3.9	83.392
693	19:25:20	22.178	95.157	3.9	83.312
694	19:25:30	22.178	95.21	3.9	83.312
695	19:25:40	22.178	95.237	11.8	83.233
696	19:25:50	22.154	95.257	11.8	83.233
697	19:26:00	22.154	95.31	3.9	83.233
698	19:26:10	22.154	95.31	11.8	83.233
699	19:26:20	22.154	95.364	3.9	83.233
700	19:26:30	22.154	95.417	3.9	83.233
701	19:26:40	22.154	95.47	3.9	83.312
702	19:26:50	22.154	95.523	11.8	83.312
703	19:27:00	22.154	95.55	3.9	83.392
704	19:27:10	22.154	95.576	3.9	83.472
705	19:27:20	22.178	95.636	3.9	83.551
706	19:27:30	22.154	95.63	11.8	83.631
707	19:27:40	22.154	95.63	3.9	83.712
708	19:27:50	22.178	95.636	3.9	83.872
709	19:28:00	22.154	95.63	3.9	83.953
710	19:28:10	22.154	95.576	3.9	84.115
711	19:28:20	22.154	95.576	3.9	84.196
712	19:28:30	22.154	95.55	3.9	84.278
713	19:28:40	22.154	95.576	3.9	84.359
714	19:28:50	22.154	95.576	3.9	84.441
715	19:29:00	22.154	95.576	3.9	84.523
716	19:29:10	22.154	95.55	3.9	84.688
717	19:29:20	22.13	95.49	3.9	84.77
718	19:29:30	22.13	95.464	11.8	84.77
719	19:29:40	22.13	95.464	3.9	84.853
720	19:29:50	22.13	95.411	3.9	84.853
721	19:30:00	22.13	95.357	3.9	84.936
722	19:30:10	22.106	95.298	3.9	84.936
723	19:30:20	22.106	95.245	3.9	84.936
724	19:30:30	22.106	95.218	3.9	84.936
725	19:30:40	22.106	95.218	3.9	84.936
726	19:30:50	22.106	95.271	3.9	84.936
727	19:31:00	22.082	95.292	11.8	84.936
728	19:31:10	22.082	95.345	3.9	84.936
729	19:31:20	22.082	95.345	3.9	84.936
730	19:31:30	22.393	97.651	3.9	86.637
731	19:31:40	22.489	98.361	3.9	88.239
732	19:31:50	22.561	98.538	3.9	89.442
733	19:32:00	22.681	98.675	3.9	90.204
734	19:32:10	22.729	98.688	3.9	92.9
735	19:32:20	22.8	98.707	3.9	94.382
736	19:32:30	22.848	98.746	3.9	94.059
737	19:32:40	22.896	98.732	3.9	93.739
738	19:32:50	22.92	98.739	3.9	93.317
739	19:33:00	22.968	98.752	3.9	93.846
740	19:33:10	22.992	98.758	3.9	93.212
741	19:33:20	23.016	98.738	3.9	92.693
742	19:33:30	23.064	98.751	3.9	92.181
743	19:33:40	23.088	98.731	3.9	91.978
744	19:33:50	23.112	98.685	3.9	91.676
745	19:34:00	23.112	98.685	3.9	91.576
746	19:34:10	23.136	98.639	3.9	91.476
747	19:34:20	23.16	98.592	3.9	91.476
748	19:34:30	23.184	98.493	3.9	91.377
749	19:34:40	23.208	98.447	3.9	91.377
750	19:34:50	23.232	98.348	3.9	91.278
751	19:35:00	23.232	98.242	3.9	92.181
752	19:35:10	23.256	98.09	3.9	91.877
753	19:35:20	23.256	97.932	3.9	91.476
754	19:35:30	23.28	97.647	3.9	91.278
755	19:35:40	23.28	97.303	3.9	90.982
756	19:35:50	23.304	96.619	3.9	90.786
757	19:36:00	23.328	96.359	3.9	90.493
758	19:36:10	23.328	96.199	3.9	90.204
759	19:36:20	23.352	95.965	3.9	89.916
760	19:36:30	23.376	95.785	3.9	89.631
761	19:36:40	23.376	95.411	3.9	89.348
762	19:36:50	23.4	95.337	3.9	88.975
763	19:37:00	23.424	94.995	11.8	88.605
764	19:37:10	23.448	95.001	3.9	88.975
765	19:37:20	23.448	94.893	3.9	89.068
766	19:37:30	23.472	94.765	11.8	88.513
767	19:37:40	23.472	94.578	11.8	88.605
768	19:37:50	23.497	94.53	11.8	90.108
769	19:38:00	23.521	94.429	3.9	90.3
770	19:38:10	23.521	94.321	3.9	89.348
771	19:38:20	23.521	94.213	3.9	88.513
772	19:38:30	23.545	94.004	3.9	87.877
773	19:38:40	23.545	93.627	3.9	87.34
774	19:38:50	23.569	93.687	3.9	86.811
775	19:39:00	23.593	93.639	11.8	86.29
776	19:39:10	23.593	93.261	3.9	85.776
777	19:39:20	23.593	93.315	11.8	85.438
778	19:39:30	23.593	93.207	3.9	85.019
779	19:39:40	23.617	93.105	11.8	84.688
780	19:39:50	23.617	92.996	11.8	84.359
781	19:40:00	23.641	92.894	3.9	84.034
782	19:40:10	23.641	92.759	3.9	83.631
783	19:40:20	23.641	92.433	3.9	83.233
784	19:40:30	23.641	92.352	3.9	82.996
785	19:40:40	23.665	92.249	11.8	82.761
786	19:40:50	23.665	92.222	3.9	82.527
787	19:41:00	23.689	92.12	3.9	82.218
788	19:41:10	23.689	91.929	11.8	81.911
789	19:41:20	23.689	91.766	3.9	81.683
790	19:41:30	23.713	91.718	3.9	81.38
791	19:41:40	23.713	91.663	3.9	81.081
792	19:41:50	23.713	91.663	3.9	80.783
793	19:42:00	23.713	91.282	3.9	80.562
794	19:42:10	23.737	91.342	3.9	80.269
795	19:42:20	23.737	91.342	11.8	80.05
796	19:42:30	23.761	91.293	3.9	79.761
797	19:42:40	23.761	91.239	3.9	79.546
798	19:42:50	23.761	91.184	3.9	79.261
799	19:43:00	23.761	91.102	11.8	79.048
800	19:43:10	23.785	91.026	11.8	78.837
801	19:43:20	23.785	90.972	3.9	78.558
802	19:43:30	23.785	90.944	3.9	78.349
803	19:43:40	23.785	90.89	3.9	78.211
804	19:43:50	23.809	90.841	3.9	78.005
805	19:44:00	23.809	90.704	3.9	77.731
806	19:44:10	23.809	90.595	3.9	77.46
807	19:44:20	23.833	90.601	3.9	77.258
808	19:44:30	23.833	90.491	3.9	76.99
809	19:44:40	23.833	90.491	11.8	76.525
810	19:44:50	23.833	90.464	11.8	76.132
811	19:45:00	23.833	90.382	3.9	75.872
812	19:45:10	23.857	90.25	3.9	75.743
813	19:45:20	23.857	90.278	3.9	75.55
814	19:45:30	23.857	90.25	3.9	75.422
815	19:45:40	23.857	90.196	3.9	75.294
816	19:45:50	23.881	90.147	3.9	75.167
817	19:46:00	23.881	90.009	3.9	75.103
818	19:46:10	23.881	90.009	3.9	75.04
819	19:46:20	23.881	90.009	11.8	74.914
820	19:46:30	23.905	89.96	3.9	74.85
821	19:46:40	23.905	89.905	3.9	74.662
822	19:46:50	23.905	89.878	3.9	74.537
823	19:47:00	23.905	89.851	3.9	74.35
824	19:47:10	23.905	89.768	3.9	74.226
825	19:47:20	23.93	89.746	3.9	74.164
826	19:47:30	23.93	89.691	3.9	74.102
827	19:47:40	23.93	89.637	11.8	74.041
828	19:47:50	23.93	89.637	3.9	73.979
829	19:48:00	23.93	89.554	3.9	73.918
830	19:48:10	23.954	89.477	3.9	73.795
831	19:48:20	23.954	89.422	3.9	73.673
832	19:48:30	23.954	89.257	3.9	73.49
833	19:48:40	23.954	89.175	3.9	73.308
834	19:48:50	23.954	89.23	3.9	73.127
835	19:49:00	23.954	89.257	3.9	73.007
836	19:49:10	23.954	89.202	3.9	72.888
837	19:49:20	23.954	89.202	3.9	72.709
838	19:49:30	23.954	89.175	3.9	72.59
839	19:49:40	23.978	89.125	3.9	72.354
840	19:49:50	23.978	89.07	3.9	72.236
841	19:50:00	23.978	88.932	11.8	72.119
842	19:50:10	23.978	88.822	3.9	72.06
843	19:50:20	23.978	88.822	3.9	71.944
844	19:50:30	23.978	88.877	3.9	71.885
845	19:50:40	23.978	88.822	3.9	71.769
846	19:50:50	23.978	88.794	3.9	71.595
847	19:51:00	23.978	88.739	3.9	71.48
848	19:51:10	23.978	88.684	3.9	71.365
849	19:51:20	23.978	88.601	3.9	71.251
850	19:51:30	23.978	88.574	3.9	71.136
851	19:51:40	23.978	88.518	3.9	71.022
Plot Title: 20034486_20170508_MiaoLi
#	Date Time, GMT+08:00	Temp, °C (LGR S/N: 20034486, SEN S/N: 20034486)	RH, % (LGR S/N: 20034486, SEN S/N: 20034486)	Intensity, Lux (LGR S/N: 20034486, SEN S/N: 20034486)	Temp, °C (LGR S/N: 20034486, SEN S/N: 20034486)	End Of File (LGR S/N: 20034486)
8287	16:31:00	28.196	69.613	1013.1	69.517	River04
8288	16:31:10	28.147	69.604	1044.6	69.299	River04
8289	16:31:20	28.072	69.53	1076.1	69.028	River04
8290	16:31:30	27.998	69.577	1107.7	68.76	River04
8291	16:31:40	27.949	69.598	1147.1	68.599	River04
8292	16:31:50	27.875	69.615	1194.4	68.386	River04
8293	16:32:00	27.825	69.727	1241.7	68.227	River04
8294	16:32:10	27.751	69.863	1289	68.016	River04
8295	16:32:20	27.702	70.065	1328.4	67.755	River04
8296	16:32:30	27.653	70.326	1367.8	67.546	River04
8297	16:32:40	27.579	70.163	1415.1	67.339	River04
8298	16:32:50	27.53	71.591	1470.3	67.03	River04
8299	16:33:00	27.456	72.144	1541.3	66.877	River04
8300	16:33:10	27.407	72.105	1635.9	66.673	River04
8301	16:33:20	27.358	71.827	1714.7	66.42	River04
8302	16:33:30	27.284	71.814	1777.8	66.169	River04
8303	16:33:40	27.235	71.566	1848.7	65.919	River04
8304	16:33:50	27.186	72.093	1880.3	65.621	River04
8305	16:34:00	27.136	72.322	1943.3	65.326	River04
8306	16:34:10	27.087	72.58	1990.6	64.984	River04
8307	16:34:20	27.038	72.601	2053.7	64.645	River04
8308	16:34:30	26.989	72.621	2093.1	64.357	River04
8309	16:34:40	26.94	72.493	2108.9	64.023	River04
8310	16:34:50	26.891	72.692	2140.4	63.739	River04
8311	16:35:00	26.842	72.979	2156.2	63.504	River04
8312	16:35:10	26.818	73.093	2156.2	63.271	River04
8313	16:35:20	26.769	73.172	2140.4	62.992	River04
8314	16:35:30	26.72	73.104	1825.1	62.807	River04
8315	16:35:40	26.695	73.602	2077.4	62.624	River04
8316	16:35:50	26.646	73.445	2030.1	62.395	River04
8317	16:36:00	26.598	73.406	1990.6	62.258	River04
8318	16:36:10	26.573	73.46	1959.1	62.122	River04
8319	16:36:20	26.524	73.569	1927.6	62.032	River04
8320	16:36:30	26.5	73.919	1911.8	61.942	River04
8321	16:36:40	26.451	74.263	1880.3	61.852	River04
8322	16:36:50	26.426	74.406	1864.5	61.762	River04
8323	16:37:00	26.378	74.485	1825.1	61.672	River04
8324	16:37:10	26.353	74.48	1777.8	61.672	River04
8325	16:37:20	26.304	74.559	1706.8	61.672	River04
8326	16:37:30	26.28	74.701	1628	61.672	River04
8327	16:37:40	26.231	74.956	1572.8	61.672	River04
8328	16:37:50	26.207	75.098	1509.7	61.672	River04
8329	16:38:00	26.158	75.265	1446.7	61.672	River04
8330	16:38:10	26.134	75.465	1375.7	61.672	River04
8331	16:38:20	26.109	75.431	1312.6	61.717	River04
8332	16:38:30	26.061	75.421	1249.6	61.807	River04
8333	16:38:40	26.036	75.504	1202.3	61.897	River04
8334	16:38:50	26.012	75.646	1147.1	62.032	River04
8335	16:39:00	25.963	75.929	1107.7	62.213	River04
8336	16:39:10	25.939	76.187	1068.2	62.395	River04
8337	16:39:20	25.89	76.294	1036.7	62.486	River04
8338	16:39:30	25.866	76.348	1020.9	62.532	River04
8339	16:39:40	25.841	76.284	1013.1	62.624	River04
8340	16:39:50	25.793	76.421	1005.2	62.715	River04
8341	16:40:00	25.768	77.086	997.3	62.807	River04
8342	16:40:10	25.744	77.488	997.3	62.946	River04
8343	16:40:20	25.695	77.42	1005.2	63.085	River04
8344	16:40:30	25.671	77.386	1005.2	63.131	River04
8345	16:40:40	25.647	77.584	989.4	63.177	River04
8346	16:40:50	25.598	78.038	965.8	63.271	River04
8347	16:41:00	25.574	78.727	926.3	63.364	River04
8348	16:41:10	25.55	78.376	886.9	63.457	River04
8349	16:41:20	25.525	78.197	839.6	63.551	River04
8350	16:41:30	25.477	78.389	800.2	63.692	River04
8351	16:41:40	25.453	78.645	752.9	63.881	River04
8352	16:41:50	25.428	78.582	713.5	63.881	River04
8353	16:42:00	25.404	77.738	674.1	63.928	River04
8354	16:42:10	25.355	78.393	642.5	64.023	River04
8355	16:42:20	25.331	78.504	618.9	64.07	River04
8356	16:42:30	25.307	79.018	603.1	64.166	River04
8357	16:42:40	25.283	79.013	587.3	64.261	River04
8358	16:42:50	25.234	79.176	579.5	64.357	River04
8359	16:43:00	25.21	78.652	579.5	64.501	River04
8360	16:43:10	25.186	78.936	563.7	64.597	River04
8361	16:43:20	25.162	79.363	563.7	64.693	River04
8362	16:43:30	25.137	79.559	555.8	64.741	River04
8363	16:43:40	25.113	79.583	555.8	64.838	River04
8364	16:43:50	25.089	79.606	555.8	64.887	River04
8365	16:44:00	25.065	79.716	555.8	64.984	River04
8366	16:44:10	25.04	79.654	563.7	65.081	River04
8367	16:44:20	25.016	79.821	579.5	65.179	River04
8368	16:44:30	24.992	80.017	595.2	65.277	River04
8369	16:44:40	24.968	80.47	611	65.375	River04
8370	16:44:50	24.919	80.66	611	65.424	River04
8371	16:45:00	24.895	80.798	618.9	65.424	River04
8372	16:45:10	24.895	80.798	634.6	65.424	River04
8373	16:45:20	24.847	80.702	634.6	65.424	River04
8374	16:45:30	24.847	80.759	626.8	65.424	River04
8375	16:45:40	24.823	80.783	618.9	65.424	River04
8376	16:45:50	24.798	80.92	603.1	65.424	River04
8377	16:46:00	24.774	80.915	603.1	65.424	River04
8378	16:46:10	24.75	80.91	587.3	65.424	River04
8379	16:46:20	24.726	80.933	587.3	65.424	River04
8380	16:46:30	24.702	81.071	595.2	65.424	River04
8381	16:46:40	24.677	81.351	603.1	65.424	River04
8382	16:46:50	24.653	81.773	603.1	65.424	River04
8383	16:47:00	24.653	81.915	603.1	65.424	River04
8384	16:47:10	24.629	81.853	587.3	65.424	River04
8385	16:47:20	24.605	81.933	571.6	65.424	River04
8386	16:47:30	24.581	82.042	555.8	65.424	River04
8387	16:47:40	24.557	82.065	547.9	65.424	River04
8388	16:47:50	24.557	82.008	547.9	65.424	River04
8389	16:48:00	24.532	81.918	555.8	65.424	River04
8390	16:48:10	24.508	82.111	555.8	65.424	River04
8391	16:48:20	24.484	82.504	571.6	65.424	River04
8392	16:48:30	24.46	83.178	579.5	65.424	River04
8393	16:48:40	24.46	83.121	579.5	65.424	River04
8394	16:48:50	24.436	83.116	587.3	65.424	River04
8395	16:49:00	24.412	82.998	595.2	65.424	River04
8396	16:49:10	24.412	83.054	603.1	65.424	River04
8397	16:49:20	24.388	83.275	611	65.424	River04
8398	16:49:30	24.363	83.75	618.9	65.424	River04
8399	16:49:40	24.363	83.665	618.9	65.424	River04
8400	16:49:50	24.339	83.434	618.9	65.424	River04
8401	16:50:00	24.315	83.231	611	65.424	River04
8402	16:50:10	24.291	83.141	611	65.424	River04
8403	16:50:20	24.291	83.112	611	65.424	River04
8404	16:50:30	24.267	83.192	603.1	65.424	River04
8405	16:50:40	24.267	83.305	603.1	65.424	River04
8406	16:50:50	24.243	83.469	603.1	65.424	River04
8407	16:51:00	24.243	83.554	603.1	65.424	River04
8408	16:51:10	24.219	83.633	595.2	65.424	River04
8409	16:51:20	24.195	83.599	595.2	65.424	River04
8410	16:51:30	24.195	83.966	587.3	65.424	River04
8411	16:51:40	24.171	84.214	587.3	65.424	River04
8412	16:51:50	24.171	84.298	579.5	65.424	River04
8413	16:52:00	24.146	84.208	579.5	65.424	River04
8414	16:52:10	24.146	84.152	579.5	65.424	River04
8415	16:52:20	24.122	84.119	587.3	65.424	River04
8416	16:52:30	24.122	84.203	595.2	65.424	River04
8417	16:52:40	24.098	84.254	611	65.375	River04
8418	16:52:50	24.098	84.338	626.8	65.375	River04
8419	16:53:00	24.074	84.586	650.4	65.375	River04
8420	16:53:10	24.074	84.501	674.1	65.375	River04
8421	16:53:20	24.05	84.496	705.6	65.375	River04
8422	16:53:30	24.05	84.44	737.1	65.375	River04
8423	16:53:40	24.026	84.659	776.6	65.375	River04
8424	16:53:50	24.026	84.575	823.9	65.375	River04
8425	16:54:00	24.026	84.659	886.9	65.375	River04
8426	16:54:10	24.002	84.794	957.9	65.375	River04
8427	16:54:20	24.002	84.934	1044.6	65.326	River04
8428	16:54:30	24.002	84.962	1123.4	65.277	River04
8429	16:54:40	23.978	85.125	1210.2	65.179	River04
8430	16:54:50	23.978	85.377	1257.5	65.033	River04
8431	16:55:00	23.978	85.293	1289	64.887	River04
8432	16:55:10	23.954	85.092	1320.5	64.741	River04
8433	16:55:20	23.954	85.176	1367.8	64.597	River04
8434	16:55:30	23.954	85.371	1407.3	64.453	River04
8435	16:55:40	23.93	85.506	1446.7	64.261	River04
8436	16:55:50	23.93	85.534	1501.9	64.07	River04
8437	16:56:00	23.93	85.59	1549.2	63.881	River04
8438	16:56:10	23.93	85.674	1580.7	63.786	River04
8439	16:56:20	23.93	85.59	1604.3	63.692	River04
8440	16:56:30	23.905	85.472	1612.2	63.551	River04
8441	16:56:40	23.905	85.584	1620.1	63.411	River04
8442	16:56:50	23.905	85.78	1643.8	63.271	River04
8443	16:57:00	23.905	85.975	1635.9	63.131	River04
8444	16:57:10	23.881	85.718	1643.8	63.038	River04
8445	16:57:20	23.881	85.663	1612.2	62.946	River04
8446	16:57:30	23.881	85.774	1580.7	62.853	River04
8447	16:57:40	23.881	85.83	1517.6	62.761	River04
8448	16:57:50	23.881	85.914	1494	62.715	River04
8449	16:58:00	23.881	85.914	1470.3	62.624	River04
8450	16:58:10	23.881	86.109	1470.3	62.532	River04
8451	16:58:20	23.857	86.159	1486.1	62.441	River04
8452	16:58:30	23.857	86.243	1525.5	62.395	River04
8453	16:58:40	23.857	86.466	1564.9	62.349	River04
8454	16:58:50	23.857	86.382	1604.3	62.349	River04
8455	16:59:00	23.857	86.243	1612.2	62.349	River04
8456	16:59:10	23.857	86.243	1620.1	62.349	River04
8457	16:59:20	23.857	86.355	1683.2	62.349	River04
8458	16:59:30	23.857	86.466	1777.8	62.349	River04
8459	16:59:40	23.857	86.549	1848.7	62.304	River04
8460	16:59:50	23.857	86.522	1943.3	62.213	River04
8461	17:00:00	23.881	86.527	1990.6	62.122	River04
8462	17:00:10	23.881	86.527	1951.2	62.032	River04
8463	17:00:20	23.881	86.583	1967	61.942	River04
8464	17:00:30	23.881	86.583	1974.9	61.852	River04
8465	17:00:40	23.881	86.638	1974.9	61.717	River04
8466	17:00:50	23.881	86.611	1990.6	61.627	River04
8467	17:01:00	23.881	86.611	1998.5	61.583	River04
8468	17:01:10	23.881	86.638	2014.3	61.493	River04
8469	17:01:20	23.881	86.666	2069.5	61.404	River04
8470	17:01:30	23.881	86.694	2124.7	61.36	River04
8471	17:01:40	23.881	86.694	2203.5	61.227	River04
8472	17:01:50	23.905	86.755	2266.6	61.05	River04
8473	17:02:00	23.905	86.783	2337.5	60.962	River04
8474	17:02:10	23.905	86.922	2400.6	60.874	River04
8475	17:02:20	23.905	86.922	2471.6	60.786	River04
8476	17:02:30	23.905	86.867	2542.5	60.699	River04
8477	17:02:40	23.905	86.867	2605.6	60.568	River04
8478	17:02:50	23.905	86.867	2652.9	60.394	River04
8479	17:03:00	23.93	86.844	2700.2	60.22	River04
8480	17:03:10	23.93	86.872	2645	60.091	River04
8481	17:03:20	23.93	86.928	2597.7	60.005	River04
8482	17:03:30	23.93	86.983	2574	59.876	River04
8483	17:03:40	23.93	86.955	2542.5	59.79	River04
8484	17:03:50	23.93	86.928	2471.6	59.705	River04
8485	17:04:00	23.93	86.955	2408.5	59.577	River04
8486	17:04:10	23.954	86.961	2361.2	59.577	River04
8487	17:04:20	23.954	86.989	2329.7	59.577	River04
8488	17:04:30	23.954	87.017	2274.5	59.577	River04
8489	17:04:40	23.954	87.1	2227.2	59.577	River04
8490	17:04:50	23.954	87.128	2124.7	59.577	River04
8491	17:05:00	23.954	87.072	2061.6	59.577	River04
8492	17:05:10	23.954	86.989	2022.2	59.62	River04
8493	17:05:20	23.954	86.961	1974.9	59.662	River04
8494	17:05:30	23.954	86.989	1943.3	59.662	River04
8495	17:05:40	23.954	87.017	1911.8	59.748	River04
8496	17:05:50	23.954	87.044	1951.2	59.79	River04
8497	17:06:00	23.978	87.161	1880.3	59.833	River04
8498	17:06:10	23.978	87.217	1959.1	59.919	River04
8499	17:06:20	23.978	87.328	1864.5	60.005	River04
8500	17:06:30	23.978	87.272	1880.3	60.091	River04
8501	17:06:40	23.978	87.355	1982.8	60.22	River04
8502	17:06:50	23.978	87.439	1833	60.264	River04
8503	17:07:00	23.978	87.439	1840.9	60.307	River04
8504	17:07:10	23.978	87.439	1738.4	60.394	River04
8505	17:07:20	23.978	87.411	1667.4	60.481	River04
8506	17:07:30	23.978	87.466	1620.1	60.655	River04
8507	17:07:40	23.978	87.522	1596.5	60.786	River04
8508	17:07:50	23.978	87.328	1572.8	60.962	River04
8509	17:08:00	24.002	87.611	1564.9	61.006	River04
8510	17:08:10	24.002	87.5	1549.2	61.05	River04
8511	17:08:20	24.002	87.832	1525.5	61.138	River04
8512	17:08:30	24.002	87.888	1486.1	61.227	River04
8513	17:08:40	24.002	87.638	1494	61.315	River04
8514	17:08:50	24.002	87.666	1533.4	61.404	River04
8515	17:09:00	24.002	87.666	1580.7	61.493	River04
8516	17:09:10	24.002	87.666	1628	61.583	River04
8517	17:09:20	24.002	87.666	1699	61.672	River04
8518	17:09:30	24.002	87.638	1762	61.672	River04
8519	17:09:40	24.002	87.666	1809.3	61.672	River04
8520	17:09:50	24.002	87.666	1840.9	61.672	River04
8521	17:10:00	24.002	87.722	1896	61.672	River04
8522	17:10:10	24.002	87.749	1974.9	61.672	River04
8523	17:10:20	24.002	87.777	2045.8	61.627	River04
8524	17:10:30	24.026	87.727	2124.7	61.627	River04
8525	17:10:40	24.026	87.672	2187.7	61.583	River04
8526	17:10:50	24.026	87.644	2242.9	61.493	River04
8527	17:11:00	24.026	87.783	2290.2	61.404	River04
8528	17:11:10	24.026	87.893	2313.9	61.36	River04
8529	17:11:20	24.05	87.954	2345.4	61.227	River04
8530	17:11:30	24.05	87.954	2424.3	61.138	River04
8531	17:11:40	24.05	87.954	2487.3	61.006	River04
8532	17:11:50	24.074	87.932	2487.3	60.918	River04
8533	17:12:00	24.074	87.738	2424.3	60.918	River04
8534	17:12:10	24.074	88.099	2313.9	60.918	River04
8535	17:12:20	24.074	88.043	2116.8	60.962	River04
8536	17:12:30	24.074	88.071	1959.1	61.006	River04
8537	17:12:40	24.098	88.021	1840.9	61.006	River04
8538	17:12:50	24.098	88.132	1746.3	61.05	River04
8539	17:13:00	24.074	87.738	1675.3	61.094	River04
8540	17:13:10	24.074	87.905	1651.6	61.182	River04
8541	17:13:20	24.074	87.905	1643.8	61.271	River04
8542	17:13:30	24.074	87.905	1643.8	61.404	River04
8543	17:13:40	24.074	87.766	1628	61.493	River04
8544	17:13:50	24.074	87.794	1612.2	61.627	River04
8545	17:14:00	24.074	87.794	1596.5	61.672	River04
8546	17:14:10	24.074	87.738	1572.8	61.717	River04
8547	17:14:20	24.05	87.733	1580.7	61.807	River04
8548	17:14:30	24.05	87.733	1580.7	61.852	River04
8549	17:14:40	24.05	87.733	1580.7	61.942	River04
8550	17:14:50	24.05	87.733	1572.8	62.032	River04
8551	17:15:00	24.026	87.644	1588.6	62.122	River04
8552	17:15:10	24.026	87.672	1620.1	62.213	River04
8553	17:15:20	24.026	87.755	1628	62.258	River04
8554	17:15:30	24.026	87.81	1612.2	62.395	River04
8555	17:15:40	24.026	87.81	1604.3	62.395	River04
8556	17:15:50	24.026	87.838	1612.2	62.395	River04
8557	17:16:00	24.002	87.888	1604.3	62.395	River04
8558	17:16:10	24.002	87.999	1596.5	62.395	River04
8559	17:16:20	24.002	87.943	1604.3	62.395	River04
8560	17:16:30	24.002	87.999	1604.3	62.395	River04
8561	17:16:40	24.002	88.026	1628	62.441	River04
8562	17:16:50	24.002	87.999	1659.5	62.395	River04
8563	17:17:00	23.978	88.076	1667.4	62.395	River04
8564	17:17:10	23.978	88.242	1651.6	62.395	River04
8565	17:17:20	23.978	88.27	1651.6	62.441	River04
8566	17:17:30	23.978	88.159	1643.8	62.441	River04
8567	17:17:40	23.978	88.297	1651.6	62.395	River04
8568	17:17:50	23.978	88.27	1643.8	62.441	River04
8569	17:18:00	23.954	88.292	1643.8	62.441	River04
8570	17:18:10	23.954	88.374	1635.9	62.395	River04
8571	17:18:20	23.954	88.374	1620.1	62.441	River04
8572	17:18:30	23.954	88.319	1604.3	62.441	River04
8573	17:18:40	23.93	88.258	1588.6	62.441	River04
8574	17:18:50	23.93	88.203	1564.9	62.441	River04
8575	17:19:00	23.93	88.203	1517.6	62.441	River04
8576	17:19:10	23.93	88.258	1478.2	62.441	River04
8577	17:19:20	23.93	88.258	1430.9	62.486	River04
8578	17:19:30	23.905	88.28	1399.4	62.532	River04
8579	17:19:40	23.905	88.308	1391.5	62.578	River04
8580	17:19:50	23.905	88.336	1375.7	62.624	River04
8581	17:20:00	23.905	88.391	1367.8	62.669	River04
8582	17:20:10	23.881	88.413	1344.2	62.761	River04
8583	17:20:20	23.881	88.358	1328.4	62.9	River04
8584	17:20:30	23.881	88.358	1320.5	62.992	River04
8585	17:20:40	23.881	88.358	1312.6	63.131	River04
8586	17:20:50	23.857	88.297	1296.9	63.177	River04
8587	17:21:00	23.857	88.297	1273.2	63.224	River04
8588	17:21:10	23.857	88.297	1265.3	63.317	River04
8589	17:21:20	23.833	88.319	1265.3	63.411	River04
8590	17:21:30	23.833	88.374	1265.3	63.504	River04
8591	17:21:40	23.833	88.457	1257.5	63.598	River04
8592	17:21:50	23.809	88.506	1265.3	63.692	River04
8593	17:22:00	23.809	88.451	1265.3	63.834	River04
8594	17:22:10	23.809	88.423	1265.3	63.881	River04
8595	17:22:20	23.809	88.451	1273.2	63.881	River04
8596	17:22:30	23.785	88.473	1289	63.881	River04
8597	17:22:40	23.785	88.556	1304.8	63.881	River04
8598	17:22:50	23.785	88.473	1328.4	63.881	River04
8599	17:23:00	23.785	88.501	1344.2	63.881	River04
8600	17:23:10	23.761	88.522	1352.1	63.881	River04
8601	17:23:20	23.761	88.578	1344.2	63.881	River04
8602	17:23:30	23.761	88.578	1344.2	63.881	River04
8603	17:23:40	23.761	88.495	1336.3	63.881	River04
8604	17:23:50	23.737	88.544	1320.5	63.881	River04
8605	17:24:00	23.737	88.627	1312.6	63.881	River04
8606	17:24:10	23.737	88.627	1312.6	63.928	River04
8607	17:24:20	23.737	88.655	1312.6	63.928	River04
8608	17:24:30	23.713	88.704	1312.6	63.928	River04
8609	17:24:40	23.713	88.759	1312.6	63.881	River04
8610	17:24:50	23.713	88.814	1320.5	63.928	River04
8611	17:25:00	23.713	88.87	1328.4	63.928	River04
8612	17:25:10	23.689	88.919	1328.4	63.928	River04
8613	17:25:20	23.689	88.974	1328.4	63.928	River04
8614	17:25:30	23.689	88.974	1320.5	63.928	River04
8615	17:25:40	23.689	88.974	1304.8	63.928	River04
8616	17:25:50	23.665	88.941	1281.1	63.928	River04
8617	17:26:00	23.665	88.996	1265.3	63.928	River04
8618	17:26:10	23.665	89.051	1249.6	63.976	River04
8619	17:26:20	23.665	89.078	1241.7	63.976	River04
8620	17:26:30	23.665	89.078	1233.8	63.976	River04
8621	17:26:40	23.665	89.106	1233.8	64.023	River04
8622	17:26:50	23.641	89.128	1233.8	64.07	River04
8623	17:27:00	23.641	89.238	1241.7	64.07	River04
8624	17:27:10	23.641	89.265	1241.7	64.118	River04
8625	17:27:20	23.641	89.183	1241.7	64.166	River04
8626	17:27:30	23.617	89.067	1249.6	64.261	River04
8627	17:27:40	23.617	89.012	1249.6	64.309	River04
8628	17:27:50	23.617	89.177	1257.5	64.405	River04
8629	17:28:00	23.617	89.452	1265.3	64.453	River04
8630	17:28:10	23.617	89.507	1273.2	64.549	River04
8631	17:28:20	23.617	89.534	1281.1	64.645	River04
8632	17:28:30	23.617	89.452	1281.1	64.693	River04
8633	17:28:40	23.593	89.336	1273.2	64.693	River04
8634	17:28:50	23.593	89.226	1273.2	64.741	River04
8635	17:29:00	23.593	89.281	1265.3	64.79	River04
8636	17:29:10	23.593	89.336	1265.3	64.79	River04
8637	17:29:20	23.593	89.336	1265.3	64.838	River04
8638	17:29:30	23.593	89.364	1265.3	64.887	River04
8639	17:29:40	23.593	89.474	1265.3	64.984	River04
8640	17:29:50	23.593	89.446	1273.2	65.033	River04
8641	17:30:00	23.569	89.386	1296.9	65.081	River04
8642	17:30:10	23.569	89.468	1312.6	65.13	River04
8643	17:30:20	23.569	89.55	1344.2	65.179	River04
8644	17:30:30	23.569	89.605	1359.9	65.277	River04
8645	17:30:40	23.569	89.633	1336.3	65.375	River04
8646	17:30:50	23.569	89.66	1344.2	65.424	River04
8647	17:31:00	23.569	89.605	1328.4	65.424	River04
8648	17:31:10	23.569	89.578	1296.9	65.424	River04
8649	17:31:20	23.569	89.66	1289	65.424	River04
8650	17:31:30	23.569	89.715	1289	65.473	River04
8651	17:31:40	23.569	89.715	1281.1	65.473	River04
8652	17:31:50	23.569	89.715	1273.2	65.473	River04
8653	17:32:00	23.569	89.688	1257.5	65.473	River04
8654	17:32:10	23.569	89.77	1249.6	65.473	River04
8655	17:32:20	23.569	89.742	1281.1	65.473	River04
8656	17:32:30	23.569	89.797	1296.9	65.473	River04
8657	17:32:40	23.569	89.825	1328.4	65.473	River04
8658	17:32:50	23.569	89.77	1312.6	65.424	River04
8659	17:33:00	23.569	89.715	1289	65.473	River04
8660	17:33:10	23.569	89.66	1320.5	65.473	River04
8661	17:33:20	23.569	89.688	1304.8	65.473	River04
8662	17:33:30	23.569	89.77	1241.7	65.473	River04
8663	17:33:40	23.569	89.797	1202.3	65.473	River04
8664	17:33:50	23.569	89.77	1162.9	65.523	River04
8665	17:34:00	23.569	89.77	1131.3	65.523	River04
8666	17:34:10	23.593	89.748	1020.9	65.523	River04
8667	17:34:20	23.593	89.776	950	65.621	River04
8668	17:34:30	23.593	89.776	902.7	65.671	River04
8669	17:34:40	23.593	89.858	855.4	65.82	River04
8670	17:34:50	23.569	89.88	839.6	65.919	River04
8671	17:35:00	23.569	89.797	831.7	66.069	River04
8672	17:35:10	23.569	89.88	823.9	66.219	River04
8673	17:35:20	23.569	89.989	808.1	66.32	River04
8674	17:35:30	23.569	90.017	784.4	66.37	River04
8675	17:35:40	23.569	89.88	752.9	66.471	River04
8676	17:35:50	23.569	89.88	721.4	66.623	River04
8677	17:36:00	23.569	89.852	689.8	66.724	River04
8678	17:36:10	23.545	89.874	674.1	66.928	River04
8679	17:36:20	23.569	89.852	666.2	67.03	River04
8680	17:36:30	23.545	89.819	674.1	67.082	River04
8681	17:36:40	23.545	89.819	681.9	67.082	River04
8682	17:36:50	23.545	89.846	681.9	67.082	River04
8683	17:37:00	23.545	89.846	681.9	67.082	River04
8684	17:37:10	23.545	89.874	681.9	67.082	River04
8685	17:37:20	23.521	89.895	674.1	67.082	River04
8686	17:37:30	23.521	89.923	674.1	67.082	River04
8687	17:37:40	23.521	89.95	666.2	67.082	River04
8688	17:37:50	23.521	89.868	674.1	67.082	River04
8689	17:38:00	23.521	89.841	681.9	67.082	River04
8690	17:38:10	23.497	89.807	689.8	67.082	River04
8691	17:38:20	23.497	89.807	697.7	67.082	River04
8692	17:38:30	23.497	89.835	713.5	67.082	River04
8693	17:38:40	23.497	89.807	721.4	67.082	River04
8694	17:38:50	23.472	89.829	729.2	67.082	River04
8695	17:39:00	23.472	89.856	729.2	67.082	River04
8696	17:39:10	23.472	89.911	737.1	67.082	River04
8697	17:39:20	23.472	89.993	737.1	67.082	River04
8698	17:39:30	23.472	90.021	737.1	67.082	River04
8699	17:39:40	23.448	90.015	745	67.082	River04
8700	17:39:50	23.448	90.07	752.9	67.082	River04
8701	17:40:00	23.448	90.042	760.8	67.082	River04
8702	17:40:10	23.448	90.07	768.7	67.082	River04
8703	17:40:20	23.448	90.07	776.6	67.082	River04
8704	17:40:30	23.424	90.119	784.4	67.082	River04
8705	17:40:40	23.424	90.119	800.2	67.082	River04
8706	17:40:50	23.424	90.338	816	67.082	River04
8707	17:41:00	23.4	90.605	831.7	67.082	River04
8708	17:41:10	23.424	90.474	847.5	67.082	River04
8709	17:41:20	23.4	90.496	863.3	67.082	River04
8710	17:41:30	23.4	90.414	871.2	67.082	River04
8711	17:41:40	23.4	90.387	879	67.082	River04
8712	17:41:50	23.376	90.326	863.3	67.082	River04
8713	17:42:00	23.376	90.381	847.5	67.082	River04
8714	17:42:10	23.376	90.353	823.9	67.133	River04
8715	17:42:20	23.376	90.353	808.1	67.082	River04
8716	17:42:30	23.376	90.326	776.6	67.082	River04
8717	17:42:40	23.352	90.32	760.8	67.133	River04
8718	17:42:50	23.352	90.43	737.1	67.133	River04
8719	17:43:00	23.352	90.43	721.4	67.184	River04
8720	17:43:10	23.352	90.43	697.7	67.236	River04
8721	17:43:20	23.352	90.539	681.9	67.287	River04
8722	17:43:30	23.352	90.512	658.3	67.339	River04
8723	17:43:40	23.352	90.594	642.5	67.391	River04
8724	17:43:50	23.328	90.588	618.9	67.494	River04
8725	17:44:00	23.328	90.588	603.1	67.65	River04
8726	17:44:10	23.328	90.588	579.5	67.755	River04
8727	17:44:20	23.328	90.588	571.6	67.859	River04
8728	17:44:30	23.304	90.527	555.8	67.964	River04
8729	17:44:40	23.304	90.527	540	68.016	River04
8730	17:44:50	23.304	90.582	524.3	68.069	River04
8731	17:45:00	23.304	90.582	516.4	68.175	River04
8732	17:45:10	23.28	90.576	500.6	68.227	River04
8733	17:45:20	23.28	90.576	484.9	68.333	River04
8734	17:45:30	23.28	90.631	477	68.439	River04
8735	17:45:40	23.28	90.576	461.2	68.599	River04
8736	17:45:50	23.256	90.625	453.3	68.706	River04
8737	17:46:00	23.256	90.734	453.3	68.76	River04
8738	17:46:10	23.256	90.898	453.3	68.76	River04
8739	17:46:20	23.256	90.952	445.4	68.813	River04
8740	17:46:30	23.256	90.925	445.4	68.76	River04
8741	17:46:40	23.256	90.898	445.4	68.76	River04
8742	17:46:50	23.232	91.001	437.5	68.813	River04
8743	17:47:00	23.232	91.028	437.5	68.813	River04
8744	17:47:10	23.232	91.028	437.5	68.813	River04
8745	17:47:20	23.232	90.946	437.5	68.813	River04
8746	17:47:30	23.232	90.919	429.7	68.813	River04
8747	17:47:40	23.232	90.946	429.7	68.867	River04
8748	17:47:50	23.208	90.886	429.7	68.867	River04
8749	17:48:00	23.208	90.886	429.7	68.921	River04
8750	17:48:10	23.208	90.941	429.7	68.921	River04
8751	17:48:20	23.208	90.886	429.7	68.975	River04
8752	17:48:30	23.184	90.88	437.5	69.028	River04
8753	17:48:40	23.208	90.995	429.7	69.082	River04
8754	17:48:50	23.184	91.044	429.7	69.137	River04
8755	17:49:00	23.184	91.071	429.7	69.245	River04
8756	17:49:10	23.184	91.207	421.8	69.299	River04
8757	17:49:20	23.184	91.18	413.9	69.408	River04
8758	17:49:30	23.184	91.207	406	69.517	River04
8759	17:49:40	23.184	91.289	398.1	69.572	River04
8760	17:49:50	23.184	91.207	398.1	69.627	River04
8761	17:50:00	23.184	91.316	398.1	69.682	River04
8762	17:50:10	23.16	91.201	406	69.737	River04
8763	17:50:20	23.16	91.201	413.9	69.792	River04
8764	17:50:30	23.16	91.256	421.8	69.847	River04
8765	17:50:40	23.16	91.256	429.7	69.902	River04
8766	17:50:50	23.16	91.256	445.4	69.957	River04
8767	17:51:00	23.16	91.256	445.4	70.012	River04
8768	17:51:10	23.16	91.337	453.3	70.068	River04
8769	17:51:20	23.16	91.473	453.3	70.123	River04
8770	17:51:30	23.136	91.522	445.4	70.179	River04
8771	17:51:40	23.136	91.44	437.5	70.29	River04
8772	17:51:50	23.136	91.413	429.7	70.346	River04
8773	17:52:00	23.136	91.359	413.9	70.402	River04
8774	17:52:10	23.136	91.331	406	70.458	River04
8775	17:52:20	23.136	91.304	406	70.458	River04
8776	17:52:30	23.112	91.244	398.1	70.458	River04
8777	17:52:40	23.112	91.271	398.1	70.458	River04
8778	17:52:50	23.112	91.298	390.2	70.514	River04
8779	17:53:00	23.112	91.353	374.5	70.514	River04
8780	17:53:10	23.112	91.407	366.6	70.514	River04
8781	17:53:20	23.112	91.326	358.7	70.514	River04
8782	17:53:30	23.112	91.38	342.9	70.514	River04
8783	17:53:40	23.112	91.353	335.1	70.514	River04
8784	17:53:50	23.088	91.347	327.2	70.514	River04
8785	17:54:00	23.112	91.434	311.4	70.514	River04
8786	17:54:10	23.088	91.429	303.5	70.57	River04
8787	17:54:20	23.088	91.51	295.6	70.57	River04
8788	17:54:30	23.088	91.619	295.6	70.57	River04
8789	17:54:40	23.088	91.592	295.6	70.57	River04
8790	17:54:50	23.088	91.51	295.6	70.57	River04
8791	17:55:00	23.088	91.564	295.6	70.57	River04
8792	17:55:10	23.088	91.619	303.5	70.57	River04
8793	17:55:20	23.088	91.673	303.5	70.626	River04
8794	17:55:30	23.088	91.592	311.4	70.626	River04
8795	17:55:40	23.064	91.559	303.5	70.626	River04
8796	17:55:50	23.064	91.613	295.6	70.626	River04
8797	17:56:00	23.064	91.613	287.8	70.683	River04
8798	17:56:10	23.064	91.586	272	70.683	River04
8799	17:56:20	23.064	91.559	264.1	70.739	River04
8800	17:56:30	23.064	91.531	248.3	70.739	River04
8801	17:56:40	23.064	91.559	240.5	70.796	River04
8802	17:56:50	23.064	91.559	232.6	70.852	River04
8803	17:57:00	23.04	91.607	216.8	70.966	River04
8804	17:57:10	23.04	91.607	208.9	71.022	River04
8805	17:57:20	23.04	91.607	201	71.079	River04
8806	17:57:30	23.04	91.607	193.2	71.193	River04
8807	17:57:40	23.04	91.661	185.3	71.308	River04
8808	17:57:50	23.04	91.634	177.4	71.365	River04
8809	17:58:00	23.04	91.661	177.4	71.423	River04
8810	17:58:10	23.04	91.933	177.4	71.48	River04
8811	17:58:20	23.04	91.933	185.3	71.48	River04
8812	17:58:30	23.016	91.927	185.3	71.538	River04
8813	17:58:40	23.04	91.878	193.2	71.595	River04
8814	17:58:50	23.016	91.954	193.2	71.653	River04
8815	17:59:00	23.04	91.987	208.9	71.711	River04
8816	17:59:10	23.016	92.035	208.9	71.769	River04
8817	17:59:20	23.016	92.089	216.8	71.827	River04
8818	17:59:30	23.016	92.144	216.8	71.944	River04
8819	17:59:40	23.016	92.198	216.8	72.06	River04
8820	17:59:50	23.016	92.144	216.8	72.177	River04	time	Temp-av	temp-std	RH-av	Rh-std	Intensity, Lux-av	Int-std		interval
8821	18:00:00	23.016	92.089	216.8	72.236	River04	before	22.81	0.12	92.91	0.41	76.1	52.2	2017-05-08	18:00-18:36
8822	18:00:10	23.016	92.035	216.8	72.295	River04
8823	18:00:20	23.016	92.008	208.9	72.295	River04
8824	18:00:30	23.016	91.981	201	72.354	River04
8825	18:00:40	23.016	92.008	193.2	72.354	River04
8826	18:00:50	23.016	92.035	185.3	72.354	River04
8827	18:01:00	22.992	92.138	177.4	72.413	River04
8828	18:01:10	22.992	92.083	177.4	72.413	River04
8829	18:01:20	22.992	92.056	177.4	72.413	River04
8830	18:01:30	22.992	92.083	177.4	72.472	River04
8831	18:01:40	22.992	92.056	177.4	72.413	River04
8832	18:01:50	22.992	92.083	177.4	72.472	River04
8833	18:02:00	22.992	92.327	177.4	72.472	River04
8834	18:02:10	22.992	92.354	169.5	72.531	River04
8835	18:02:20	22.992	92.3	169.5	72.531	River04
8836	18:02:30	22.992	92.381	169.5	72.59	River04
8837	18:02:40	22.992	92.381	177.4	72.649	River04
8838	18:02:50	22.968	92.348	185.3	72.649	River04
8839	18:03:00	22.968	92.294	193.2	72.709	River04
8840	18:03:10	22.968	92.294	201	72.709	River04
8841	18:03:20	22.968	92.267	201	72.768	River04
8842	18:03:30	22.968	92.24	201	72.828	River04
8843	18:03:40	22.968	92.267	193.2	72.888	River04
8844	18:03:50	22.968	92.24	193.2	73.007	River04
8845	18:04:00	22.968	92.294	193.2	73.067	River04
8846	18:04:10	22.968	92.402	193.2	73.127	River04
8847	18:04:20	22.968	92.402	185.3	73.188	River04
8848	18:04:30	22.944	92.397	193.2	73.248	River04
8849	18:04:40	22.944	92.451	193.2	73.248	River04
8850	18:04:50	22.944	92.505	193.2	73.308	River04
8851	18:05:00	22.944	92.505	193.2	73.308	River04
8852	18:05:10	22.944	92.451	185.3	73.308	River04
8853	18:05:20	22.944	92.369	169.5	73.308	River04
8854	18:05:30	22.944	92.342	161.6	73.369	River04
8855	18:05:40	22.944	92.342	153.7	73.369	River04
8856	18:05:50	22.944	92.342	145.8	73.369	River04
8857	18:06:00	22.944	92.505	138	73.369	River04
8858	18:06:10	22.944	92.559	122.2	73.429	River04
8859	18:06:20	22.92	92.418	122.2	73.429	River04
8860	18:06:30	22.92	92.336	114.3	73.49	River04
8861	18:06:40	22.92	92.282	106.4	73.551	River04
8862	18:06:50	22.92	92.282	106.4	73.612	River04
8863	18:07:00	22.92	92.309	98.5	73.673	River04
8864	18:07:10	22.92	92.336	90.7	73.734	River04
8865	18:07:20	22.92	92.336	82.8	73.856	River04
8866	18:07:30	22.92	92.336	74.9	73.918	River04
8867	18:07:40	22.92	92.336	74.9	74.041	River04
8868	18:07:50	22.92	92.364	67	74.164	River04
8869	18:08:00	22.92	92.445	59.1	74.226	River04
8870	18:08:10	22.92	92.445	59.1	74.226	River04
8871	18:08:20	22.896	92.439	59.1	74.226	River04
8872	18:08:30	22.896	92.493	51.2	74.288	River04
8873	18:08:40	22.896	92.655	51.2	74.288	River04
8874	18:08:50	22.92	92.661	51.2	74.288	River04
8875	18:09:00	22.92	92.634	51.2	74.35	River04
8876	18:09:10	22.896	92.682	51.2	74.35	River04
8877	18:09:20	22.92	92.823	51.2	74.35	River04
8878	18:09:30	22.896	92.682	51.2	74.35	River04
8879	18:09:40	22.896	92.817	51.2	74.412	River04
8880	18:09:50	22.896	92.709	51.2	74.412	River04
8881	18:10:00	22.896	92.763	51.2	74.412	River04
8882	18:10:10	22.896	92.871	51.2	74.412	River04
8883	18:10:20	22.896	93.087	59.1	74.412	River04
8884	18:10:30	22.896	93.06	59.1	74.412	River04
8885	18:10:40	22.896	92.925	59.1	74.474	River04
8886	18:10:50	22.896	93.006	59.1	74.474	River04
8887	18:11:00	22.896	92.925	59.1	74.537	River04
8888	18:11:10	22.896	92.817	67	74.537	River04
8889	18:11:20	22.896	92.925	74.9	74.599	River04
8890	18:11:30	22.896	92.925	74.9	74.599	River04
8891	18:11:40	22.896	92.817	74.9	74.662	River04
8892	18:11:50	22.896	92.817	82.8	74.662	River04
8893	18:12:00	22.896	92.925	82.8	74.725	River04
8894	18:12:10	22.896	92.817	82.8	74.725	River04
8895	18:12:20	22.896	92.763	82.8	74.725	River04
8896	18:12:30	22.896	92.817	82.8	74.725	River04
8897	18:12:40	22.896	92.871	82.8	74.788	River04
8898	18:12:50	22.896	92.871	82.8	74.788	River04
8899	18:13:00	22.872	92.811	82.8	74.85	River04
8900	18:13:10	22.872	92.757	82.8	74.85	River04
8901	18:13:20	22.872	92.784	82.8	74.914	River04
8902	18:13:30	22.872	92.811	74.9	74.914	River04
8903	18:13:40	22.872	92.757	74.9	74.977	River04
8904	18:13:50	22.872	92.703	67	74.977	River04
8905	18:14:00	22.872	92.676	67	75.04	River04
8906	18:14:10	22.872	92.703	67	75.103	River04
8907	18:14:20	22.872	92.703	67	75.103	River04
8908	18:14:30	22.872	92.703	67	75.167	River04
8909	18:14:40	22.872	92.676	59.1	75.167	River04
8910	18:14:50	22.848	92.724	67	75.23	River04
8911	18:15:00	22.848	92.724	59.1	75.23	River04
8912	18:15:10	22.848	92.697	59.1	75.23	River04
8913	18:15:20	22.848	92.751	59.1	75.23	River04
8914	18:15:30	22.848	92.859	59.1	75.23	River04
8915	18:15:40	22.848	92.859	59.1	75.23	River04
8916	18:15:50	22.848	92.913	59.1	75.23	River04
8917	18:16:00	22.848	93.021	59.1	75.294	River04
8918	18:16:10	22.848	93.075	59.1	75.294	River04
8919	18:16:20	22.848	93.021	67	75.294	River04
8920	18:16:30	22.848	93.075	67	75.358	River04
8921	18:16:40	22.848	92.994	67	75.358	River04
8922	18:16:50	22.848	92.967	67	75.358	River04
8923	18:17:00	22.848	92.967	67	75.358	River04
8924	18:17:10	22.848	92.967	67	75.358	River04
8925	18:17:20	22.848	92.913	59.1	75.358	River04
8926	18:17:30	22.848	92.886	59.1	75.358	River04
8927	18:17:40	22.848	92.859	59.1	75.422	River04
8928	18:17:50	22.824	92.853	59.1	75.422	River04
8929	18:18:00	22.848	92.832	51.2	75.422	River04
8930	18:18:10	22.848	92.832	51.2	75.358	River04
8931	18:18:20	22.824	92.853	51.2	75.358	River04
8932	18:18:30	22.824	92.907	43.4	75.358	River04
8933	18:18:40	22.824	92.961	43.4	75.358	River04
8934	18:18:50	22.824	92.907	43.4	75.358	River04
8935	18:19:00	22.824	92.907	43.4	75.422	River04
8936	18:19:10	22.824	92.907	35.5	75.422	River04
8937	18:19:20	22.824	92.934	35.5	75.422	River04
8938	18:19:30	22.824	92.907	35.5	75.422	River04
8939	18:19:40	22.824	92.907	35.5	75.486	River04
8940	18:19:50	22.824	92.88	35.5	75.486	River04
8941	18:20:00	22.824	92.88	43.4	75.486	River04
8942	18:20:10	22.824	92.961	43.4	75.55	River04
8943	18:20:20	22.8	93.09	43.4	75.614	River04
8944	18:20:30	22.824	93.15	43.4	75.614	River04
8945	18:20:40	22.824	93.231	51.2	75.678	River04
8946	18:20:50	22.8	93.171	51.2	75.743	River04
8947	18:21:00	22.8	93.117	51.2	75.807	River04
8948	18:21:10	22.8	93.171	51.2	75.872	River04
8949	18:21:20	22.8	93.144	59.1	75.937	River04
8950	18:21:30	22.8	93.171	59.1	76.002	River04
8951	18:21:40	22.8	93.198	59.1	76.067	River04
8952	18:21:50	22.8	93.171	67	76.132	River04
8953	18:22:00	22.8	93.117	59.1	76.132	River04
8954	18:22:10	22.8	93.144	67	76.197	River04
8955	18:22:20	22.8	93.171	67	76.197	River04
8956	18:22:30	22.8	93.252	67	76.197	River04
8957	18:22:40	22.8	93.171	67	76.132	River04
8958	18:22:50	22.8	93.171	67	76.132	River04
8959	18:23:00	22.776	93.138	67	76.132	River04
8960	18:23:10	22.776	93.138	67	76.132	River04
8961	18:23:20	22.776	93.165	67	76.197	River04
8962	18:23:30	22.776	93.165	67	76.132	River04
8963	18:23:40	22.776	93.192	59.1	76.197	River04
8964	18:23:50	22.776	93.273	59.1	76.197	River04
8965	18:24:00	22.776	93.299	59.1	76.197	River04
8966	18:24:10	22.776	93.246	59.1	76.197	River04
8967	18:24:20	22.753	93.186	59.1	76.197	River04
8968	18:24:30	22.776	93.111	59.1	76.197	River04
8969	18:24:40	22.776	93.111	59.1	76.197	River04
8970	18:24:50	22.753	93.105	59.1	76.197	River04
8971	18:25:00	22.753	93.051	59.1	76.197	River04
8972	18:25:10	22.753	93.051	59.1	76.197	River04
8973	18:25:20	22.753	93.024	59.1	76.197	River04
8974	18:25:30	22.753	93.051	59.1	76.197	River04
8975	18:25:40	22.753	93.051	59.1	76.197	River04
8976	18:25:50	22.753	93.105	59.1	76.197	River04
8977	18:26:00	22.753	93.105	59.1	76.197	River04
8978	18:26:10	22.753	93.105	59.1	76.263	River04
8979	18:26:20	22.753	93.105	59.1	76.197	River04
8980	18:26:30	22.753	93.078	59.1	76.197	River04
8981	18:26:40	22.753	93.105	59.1	76.197	River04
8982	18:26:50	22.753	93.132	59.1	76.197	River04
8983	18:27:00	22.729	93.099	59.1	76.263	River04
8984	18:27:10	22.729	93.099	59.1	76.263	River04
8985	18:27:20	22.729	93.099	59.1	76.263	River04
8986	18:27:30	22.729	93.099	59.1	76.263	River04
8987	18:27:40	22.729	93.153	59.1	76.263	River04
8988	18:27:50	22.729	93.126	59.1	76.263	River04
8989	18:28:00	22.729	93.153	59.1	76.263	River04
8990	18:28:10	22.729	93.099	59.1	76.263	River04
8991	18:28:20	22.705	93.147	51.2	76.263	River04
8992	18:28:30	22.705	93.147	51.2	76.263	River04
8993	18:28:40	22.705	93.147	51.2	76.263	River04
8994	18:28:50	22.705	93.147	51.2	76.263	River04
8995	18:29:00	22.705	93.147	51.2	76.263	River04
8996	18:29:10	22.705	93.147	51.2	76.263	River04
8997	18:29:20	22.705	93.147	51.2	76.263	River04
8998	18:29:30	22.681	93.141	43.4	76.328	River04
8999	18:29:40	22.681	93.141	51.2	76.328	River04
9000	18:29:50	22.681	93.168	43.4	76.328	River04
9001	18:30:00	22.681	93.195	43.4	76.328	River04
9002	18:30:10	22.681	93.195	43.4	76.328	River04
9003	18:30:20	22.681	93.195	43.4	76.328	River04
9004	18:30:30	22.681	93.168	43.4	76.328	River04
9005	18:30:40	22.681	93.195	35.5	76.328	River04
9006	18:30:50	22.681	93.195	35.5	76.328	River04
9007	18:31:00	22.657	93.216	35.5	76.328	River04
9008	18:31:10	22.657	93.243	35.5	76.328	River04
9009	18:31:20	22.657	93.458	35.5	76.328	River04
9010	18:31:30	22.657	93.512	35.5	76.328	River04
9011	18:31:40	22.657	93.512	35.5	76.328	River04
9012	18:31:50	22.657	93.565	35.5	76.394	River04
9013	18:32:00	22.657	93.565	35.5	76.394	River04
9014	18:32:10	22.657	93.565	35.5	76.394	River04
9015	18:32:20	22.657	93.538	35.5	76.46	River04
9016	18:32:30	22.633	93.506	27.6	76.46	River04
9017	18:32:40	22.633	93.452	35.5	76.46	River04
9018	18:32:50	22.633	93.506	27.6	76.46	River04
9019	18:33:00	22.633	93.479	27.6	76.46	River04
9020	18:33:10	22.633	93.452	27.6	76.46	River04
9021	18:33:20	22.633	93.479	27.6	76.46	River04
9022	18:33:30	22.633	93.452	27.6	76.46	River04
9023	18:33:40	22.609	93.446	27.6	76.46	River04
9024	18:33:50	22.609	93.392	27.6	76.46	River04
9025	18:34:00	22.609	93.446	27.6	76.46	River04
9026	18:34:10	22.609	93.392	27.6	76.46	River04
9027	18:34:20	22.609	93.446	27.6	76.46	River04
9028	18:34:30	22.585	93.467	19.7	76.46	River04
9029	18:34:40	22.585	93.467	19.7	76.46	River04
9030	18:34:50	22.585	93.44	19.7	76.46	River04
9031	18:35:00	22.585	93.467	19.7	76.525	River04
9032	18:35:10	22.585	93.494	19.7	76.46	River04
9033	18:35:20	22.585	93.494	19.7	76.525	River04
9034	18:35:30	22.585	93.494	19.7	76.525	River04
9035	18:35:40	22.585	93.494	19.7	76.525	River04
9036	18:35:50	22.585	93.52	19.7	76.525	River04
9037	18:36:00	22.561	93.541	19.7	76.525	River04
9038	18:36:10	22.561	93.541	19.7	76.591	River04
9039	18:36:20	22.561	93.595	19.7	76.591	River04
9040	18:36:30	22.561	93.568	19.7	76.591	River04
9041	18:36:40	22.561	93.568	19.7	76.657	River04
9042	18:36:50	22.561	93.568	19.7	76.657	River04	time	Temp-av	temp-std	RH-av	Rh-std	Intensity, Lux-av	Int-std		interval
9043	18:37:00	22.561	93.568	11.8	76.657	flash	flash	22	0.29	95.06	0.73	6.35	3.69	2017-05-08	18:37-20:00
9044	18:37:10	22.561	93.568	11.8	76.724
9045	18:37:20	22.537	93.589	19.7	76.724
9046	18:37:30	22.537	93.589	11.8	76.79
9047	18:37:40	22.537	93.616	11.8	76.79
9048	18:37:50	22.537	93.643	11.8	76.856
9049	18:38:00	22.537	93.643	11.8	76.923
9050	18:38:10	22.537	93.643	11.8	76.99
9051	18:38:20	22.537	93.67	11.8	77.056
9052	18:38:30	22.537	93.67	11.8	77.123
9053	18:38:40	22.537	93.696	11.8	77.19
9054	18:38:50	22.513	93.69	11.8	77.258
9055	18:39:00	22.513	93.69	11.8	77.258
9056	18:39:10	22.513	93.69	11.8	77.325
9057	18:39:20	22.513	93.69	11.8	77.325
9058	18:39:30	22.513	93.717	11.8	77.392
9059	18:39:40	22.513	93.69	11.8	77.392
9060	18:39:50	22.513	93.744	11.8	77.392
9061	18:40:00	22.513	93.744	11.8	77.46
9062	18:40:10	22.513	93.744	11.8	77.46
9063	18:40:20	22.513	93.744	11.8	77.46
9064	18:40:30	22.489	93.738	11.8	77.46
9065	18:40:40	22.489	93.765	11.8	77.46
9066	18:40:50	22.489	93.738	11.8	77.527
9067	18:41:00	22.489	93.765	11.8	77.527
9068	18:41:10	22.489	93.819	11.8	77.527
9069	18:41:20	22.489	93.792	11.8	77.595
9070	18:41:30	22.465	93.759	11.8	77.595
9071	18:41:40	22.465	93.759	11.8	77.595
9072	18:41:50	22.465	93.786	3.9	77.595
9073	18:42:00	22.465	93.786	11.8	77.595
9074	18:42:10	22.465	93.759	11.8	77.595
9075	18:42:20	22.465	93.786	11.8	77.595
9076	18:42:30	22.465	93.786	3.9	77.663
9077	18:42:40	22.465	93.786	11.8	77.663
9078	18:42:50	22.465	93.786	3.9	77.731
9079	18:43:00	22.465	93.813	3.9	77.731
9080	18:43:10	22.441	93.833	11.8	77.799
9081	18:43:20	22.441	93.86	11.8	77.799
9082	18:43:30	22.441	93.833	3.9	77.868
9083	18:43:40	22.441	93.86	3.9	77.936
9084	18:43:50	22.441	93.887	3.9	78.005
9085	18:44:00	22.441	93.887	11.8	78.073
9086	18:44:10	22.441	93.887	3.9	78.142
9087	18:44:20	22.441	93.914	3.9	78.211
9088	18:44:30	22.441	93.887	3.9	78.28
9089	18:44:40	22.441	93.914	3.9	78.28
9090	18:44:50	22.417	93.908	3.9	78.28
9091	18:45:00	22.417	93.908	3.9	78.28
9092	18:45:10	22.417	93.935	3.9	78.28
9093	18:45:20	22.417	93.935	11.8	78.349
9094	18:45:30	22.417	93.935	3.9	78.349
9095	18:45:40	22.417	93.935	3.9	78.349
9096	18:45:50	22.417	93.935	11.8	78.349
9097	18:46:00	22.417	93.935	3.9	78.349
9098	18:46:10	22.393	93.955	3.9	78.349
9099	18:46:20	22.417	93.935	11.8	78.349
9100	18:46:30	22.393	93.955	3.9	78.349
9101	18:46:40	22.393	93.982	3.9	78.349
9102	18:46:50	22.393	93.982	3.9	78.349
9103	18:47:00	22.393	93.982	11.8	78.349
9104	18:47:10	22.393	93.982	11.8	78.349
9105	18:47:20	22.393	93.982	3.9	78.349
9106	18:47:30	22.393	93.982	11.8	78.418
9107	18:47:40	22.393	94.009	3.9	78.418
9108	18:47:50	22.369	94.003	3.9	78.418
9109	18:48:00	22.369	94.03	3.9	78.418
9110	18:48:10	22.369	94.03	3.9	78.418
9111	18:48:20	22.369	94.03	3.9	78.418
9112	18:48:30	22.369	94.03	3.9	78.418
9113	18:48:40	22.369	94.03	3.9	78.418
9114	18:48:50	22.369	94.057	11.8	78.418
9115	18:49:00	22.369	94.083	11.8	78.418
9116	18:49:10	22.369	94.11	3.9	78.418
9117	18:49:20	22.345	94.131	3.9	78.488
9118	18:49:30	22.345	94.131	3.9	78.488
9119	18:49:40	22.345	94.158	3.9	78.418
9120	18:49:50	22.345	94.158	3.9	78.418
9121	18:50:00	22.345	94.184	11.8	78.418
9122	18:50:10	22.345	94.238	3.9	78.418
9123	18:50:20	22.345	94.238	3.9	78.488
9124	18:50:30	22.345	94.292	3.9	78.488
9125	18:50:40	22.345	94.318	3.9	78.488
9126	18:50:50	22.321	94.339	3.9	78.488
9127	18:51:00	22.345	94.345	3.9	78.488
9128	18:51:10	22.321	94.339	3.9	78.488
9129	18:51:20	22.321	94.312	3.9	78.558
9130	18:51:30	22.321	94.285	3.9	78.558
9131	18:51:40	22.321	94.285	3.9	78.488
9132	18:51:50	22.321	94.285	3.9	78.558
9133	18:52:00	22.321	94.285	3.9	78.488
9134	18:52:10	22.321	94.285	3.9	78.488
9135	18:52:20	22.298	94.306	3.9	78.558
9136	18:52:30	22.298	94.306	3.9	78.488
9137	18:52:40	22.298	94.279	3.9	78.558
9138	18:52:50	22.298	94.306	3.9	78.558
9139	18:53:00	22.298	94.333	3.9	78.558
9140	18:53:10	22.298	94.333	3.9	78.558
9141	18:53:20	22.298	94.306	3.9	78.627
9142	18:53:30	22.298	94.333	3.9	78.627
9143	18:53:40	22.298	94.333	3.9	78.697
9144	18:53:50	22.298	94.306	3.9	78.697
9145	18:54:00	22.298	94.333	11.8	78.697
9146	18:54:10	22.298	94.386	11.8	78.697
9147	18:54:20	22.298	94.36	11.8	78.697
9148	18:54:30	22.298	94.386	3.9	78.767
9149	18:54:40	22.274	94.354	3.9	78.767
9150	18:54:50	22.274	94.38	3.9	78.837
9151	18:55:00	22.274	94.38	3.9	78.837
9152	18:55:10	22.274	94.38	3.9	78.837
9153	18:55:20	22.274	94.407	3.9	78.907
9154	18:55:30	22.274	94.407	3.9	78.907
9155	18:55:40	22.274	94.38	3.9	78.978
9156	18:55:50	22.25	94.374	3.9	78.978
9157	18:56:00	22.25	94.374	3.9	78.978
9158	18:56:10	22.25	94.374	3.9	79.048
9159	18:56:20	22.25	94.401	3.9	79.119
9160	18:56:30	22.25	94.428	3.9	79.19
9161	18:56:40	22.25	94.428	3.9	79.19
9162	18:56:50	22.25	94.428	11.8	79.261
9163	18:57:00	22.25	94.428	3.9	79.332
9164	18:57:10	22.25	94.454	3.9	79.403
9165	18:57:20	22.226	94.475	3.9	79.474
9166	18:57:30	22.226	94.448	11.8	79.474
9167	18:57:40	22.226	94.448	3.9	79.546
9168	18:57:50	22.226	94.475	3.9	79.546
9169	18:58:00	22.226	94.529	3.9	79.546
9170	18:58:10	22.226	94.475	3.9	79.618
9171	18:58:20	22.226	94.475	3.9	79.618
9172	18:58:30	22.226	94.475	3.9	79.689
9173	18:58:40	22.226	94.475	3.9	79.689
9174	18:58:50	22.202	94.469	11.8	79.761
9175	18:59:00	22.202	94.496	3.9	79.761
9176	18:59:10	22.202	94.522	3.9	79.833
9177	18:59:20	22.202	94.522	3.9	79.833
9178	18:59:30	22.202	94.522	3.9	79.833
9179	18:59:40	22.202	94.522	3.9	79.905
9180	18:59:50	22.202	94.522	3.9	79.905
9181	19:00:00	22.202	94.522	3.9	79.905
9182	19:00:10	22.202	94.549	3.9	79.978
9183	19:00:20	22.202	94.549	11.8	80.05
9184	19:00:30	22.178	94.57	11.8	80.05
9185	19:00:40	22.202	94.576	11.8	80.123
9186	19:00:50	22.178	94.57	3.9	80.196
9187	19:01:00	22.178	94.57	3.9	80.196
9188	19:01:10	22.178	94.597	3.9	80.269
9189	19:01:20	22.178	94.623	3.9	80.269
9190	19:01:30	22.178	94.623	3.9	80.342
9191	19:01:40	22.178	94.677	11.8	80.342
9192	19:01:50	22.178	94.677	3.9	80.342
9193	19:02:00	22.178	94.677	11.8	80.342
9194	19:02:10	22.178	94.65	3.9	80.415
9195	19:02:20	22.178	94.677	11.8	80.415
9196	19:02:30	22.154	94.671	11.8	80.415
9197	19:02:40	22.154	94.697	11.8	80.415
9198	19:02:50	22.154	94.697	11.8	80.342
9199	19:03:00	22.154	94.697	3.9	80.342
9200	19:03:10	22.154	94.724	3.9	80.342
9201	19:03:20	22.154	94.724	11.8	80.342
9202	19:03:30	22.154	94.724	11.8	80.269
9203	19:03:40	22.154	94.724	3.9	80.269
9204	19:03:50	22.154	94.724	11.8	80.269
9205	19:04:00	22.154	94.724	11.8	80.196
9206	19:04:10	22.154	94.724	11.8	80.123
9207	19:04:20	22.154	94.751	11.8	80.123
9208	19:04:30	22.154	94.751	3.9	80.05
9209	19:04:40	22.154	94.724	11.8	80.05
9210	19:04:50	22.13	94.718	11.8	79.978
9211	19:05:00	22.13	94.718	3.9	79.905
9212	19:05:10	22.13	94.745	3.9	79.905
9213	19:05:20	22.13	94.745	11.8	79.833
9214	19:05:30	22.13	94.771	3.9	79.761
9215	19:05:40	22.13	94.771	11.8	79.761
9216	19:05:50	22.13	94.771	3.9	79.689
9217	19:06:00	22.13	94.771	11.8	79.689
9218	19:06:10	22.13	94.771	11.8	79.689
9219	19:06:20	22.13	94.771	3.9	79.618
9220	19:06:30	22.13	94.771	11.8	79.618
9221	19:06:40	22.13	94.798	3.9	79.546
9222	19:06:50	22.13	94.825	11.8	79.546
9223	19:07:00	22.13	94.825	3.9	79.546
9224	19:07:10	22.13	94.825	3.9	79.474
9225	19:07:20	22.106	94.818	3.9	79.474
9226	19:07:30	22.106	94.818	3.9	79.474
9227	19:07:40	22.13	94.825	11.8	79.403
9228	19:07:50	22.106	94.845	3.9	79.403
9229	19:08:00	22.106	94.845	3.9	79.403
9230	19:08:10	22.106	94.818	3.9	79.403
9231	19:08:20	22.106	94.845	3.9	79.403
9232	19:08:30	22.106	94.872	3.9	79.403
9233	19:08:40	22.106	94.872	11.8	79.332
9234	19:08:50	22.106	94.872	3.9	79.332
[truncated: 312 more rows]
